# Supplementary material for: Explore the Mechanism of Astragalus mongholicus Bunge against Nonalcoholic Fatty Liver Disease Based on Network Pharmacology and Experimental Verification
Source: Hindawi journal article supplement (doi:10.1155/2022/4745042), 2022-04-05
Supplement: f1 [file 4745042.f1.zip]

| Mol ID    | MolName                                                        | Symbol   | Symbol (removing duplicates) |
|-----------|----------------------------------------------------------------|----------|------------------------------|
| MOL000211 | Mairin                                                         | PGR      | PGR                          |
| MOL000239 | Jaranol                                                        | NOS2     | NOS2                         |
| MOL000239 | Jaranol                                                        | PTGS1    | PTGS1                        |
| MOL000239 | Jaranol                                                        | AR       | AR                           |
| MOL000239 | Jaranol                                                        | SCN5A    | SCN5A                        |
| MOL000239 | Jaranol                                                        | PTGS2    | PTGS2                        |
| MOL000239 | Jaranol                                                        | ESR2     | ESR2                         |
| MOL000239 | Jaranol                                                        | DPP4     | DPP4                         |
| MOL000239 | Jaranol                                                        | HSP90AA1 | HSP90AA1                     |
| MOL000239 | Jaranol                                                        | CDK2     | CDK2                         |
| MOL000239 | Jaranol                                                        | CHEK1    | CHEK1                        |
| MOL000239 | Jaranol                                                        | PRSS1    | PRSS1                        |
| MOL000239 | Jaranol                                                        | NCOA2    | NCOA2                        |
| MOL000239 | Jaranol                                                        | CALM     | CALM                         |
| MOL000296 | hederagenin                                                    | PGR      | CHRM3                        |
| MOL000296 | hederagenin                                                    | NCOA2    | CHRM1                        |
| MOL000296 | hederagenin                                                    | CHRM3    | GABRA2                       |
| MOL000296 | hederagenin                                                    | CHRM1    | GABRA3                       |
| MOL000296 | hederagenin                                                    | GABRA2   | CHRM2                        |
| MOL000296 | hederagenin                                                    | GABRA3   | ADRA1B                       |
| MOL000296 | hederagenin                                                    | CHRM2    | GABRA1                       |
| MOL000296 | hederagenin                                                    | ADRA1B   | GRIA2                        |
| MOL000296 | hederagenin                                                    | GABRA1   | GABRA6                       |
| MOL000296 | hederagenin                                                    | GRIA2    | GABRA5                       |
| MOL000296 | hederagenin                                                    | GABRA6   | IGHG1                        |
| MOL000296 | hederagenin                                                    | GABRA5   | LYZ                          |
| MOL000296 | hederagenin                                                    | IGHG1    | COBT                         |
| MOL000296 | hederagenin                                                    | LYZ      | RXRA                         |
| MOL000296 | hederagenin                                                    | COBT     | PDE3A                        |
| MOL000296 | hederagenin                                                    | PTGS1    | SLC6A2                       |
| MOL000296 | hederagenin                                                    | SCN5A    | NOR51B                       |
| MOL000296 | hederagenin                                                    | PTGS2    | ESR1                         |
| MOL000296 | hederagenin                                                    | RXRA     | PPARG                        |
| MOL000296 | hederagenin                                                    | PDE3A    | PTPN1                        |
| MOL000296 | hederagenin                                                    | SLC6A2   | MAPK14                       |
| MOL000296 | hederagenin                                                    | NOR51B   | GSK3B                        |
| MOL000033 | (3S,8S,9S,10R,11S)-3,8,9,10-tetrahydro-11H-pyrido[4,3-b]indole | PGR      | PIK3CG                       |
| MOL000354 | isorhamnetin                                                   | NOS2     | PRKACA                       |
| MOL000354 | isorhamnetin                                                   | PTGS1    | PIM1                         |
| MOL000354 | isorhamnetin                                                   | ESR1     | CCNA2                        |
| MOL000354 | isorhamnetin                                                   | AR       | PYGM                         |
| MOL000354 | isorhamnetin                                                   | PPARG    | PPARD                        |
| MOL000354 | isorhamnetin                                                   | PTGS2    | AKR1B1                       |
| MOL000354 | isorhamnetin                                                   | PTPN1    | NCOA1                        |
| MOL000354 | isorhamnetin                                                   | ESR2     | F7                           |
| MOL000354 | isorhamnetin                                                   | DPP4     | F2                           |
| MOL000354 | isorhamnetin                                                   | MAPK14   | NOS3                         |
| MOL000354 | isorhamnetin                                                   | GSK3B    | ACHE                         |
| MOL000354 | isorhamnetin                                                   | HSP90AA1 | MAOB                         |
| MOL000354 | isorhamnetin                                                   | CDK2     | RELA                         |

|           |                 |        |        |
|-----------|-----------------|--------|--------|
| MOL000354 | isorhamnetin    | PIK3CG | XDH    |
| MOL000354 | isorhamnetin    | PRKACA | NCF1   |
| MOL000354 | isorhamnetin    | PRSS1  | LDLR   |
| MOL000354 | isorhamnetin    | PIM1   | ADRB1  |
| MOL000354 | isorhamnetin    | CCNA2  | HTR3A  |
| MOL000354 | isorhamnetin    | NCOA2  | ADRA2C |
| MOL000354 | isorhamnetin    | CALM   | ADRB2  |
| MOL000354 | isorhamnetin    | PYGM   | ADRA1D |
| MOL000354 | isorhamnetin    | PPARD  | OPRM1  |
| MOL000354 | isorhamnetin    | CHEK1  | DRD1   |
| MOL000354 | isorhamnetin    | AKR1B1 | KCNH2  |
| MOL000354 | isorhamnetin    | NCOA1  | F10    |
| MOL000354 | isorhamnetin    | F7     | CHRM5  |
| MOL000354 | isorhamnetin    | F2     | CHRM4  |
| MOL000354 | isorhamnetin    | NOS3   | OPRD1  |
| MOL000354 | isorhamnetin    | ACHE   | HTR2A  |
| MOL000354 | isorhamnetin    | GABRA1 | ADRA1A |
| MOL000354 | isorhamnetin    | MAOB   | SLC6A3 |
| MOL000354 | isorhamnetin    | GRIA2  | SLC6A4 |
| MOL000354 | isorhamnetin    | NOR51B | KCNMA1 |
| MOL000354 | isorhamnetin    | RELA   | TOP2A  |
| MOL000354 | isorhamnetin    | XDH    | CHRNA7 |
| MOL000354 | isorhamnetin    | NCF1   | KDR    |
| MOL000354 | isorhamnetin    | LDLR   | MET    |
| MOL000371 | 3,9-di-O-methyl | NOS2   | PKIA   |
| MOL000371 | 3,9-di-O-methyl | PTGS1  | LACTB  |
| MOL000371 | 3,9-di-O-methyl | CHRM3  | JUN    |
| MOL000371 | 3,9-di-O-methyl | F2     | IL4R   |
| MOL000371 | 3,9-di-O-methyl | CHRM1  | SIRT1  |
| MOL000371 | 3,9-di-O-methyl | ESR1   | ATP5B  |
| MOL000371 | 3,9-di-O-methyl | ADRB1  | MT-ND6 |
| MOL000371 | 3,9-di-O-methyl | SCN5A  | HSD3B2 |
| MOL000371 | 3,9-di-O-methyl | PTGS2  | HSD3B1 |
| MOL000371 | 3,9-di-O-methyl | NOS3   | IKBKB  |
| MOL000371 | 3,9-di-O-methyl | HTR3A  | AKT1   |
| MOL000371 | 3,9-di-O-methyl | ADRA2C | BCL2   |
| MOL000371 | 3,9-di-O-methyl | RXRA   | BAX    |
| MOL000371 | 3,9-di-O-methyl | ACHE   | TNF    |
| MOL000371 | 3,9-di-O-methyl | PDE3A  | AHSA1  |
| MOL000371 | 3,9-di-O-methyl | ADRA1B | CASP3  |
| MOL000371 | 3,9-di-O-methyl | ADRB2  | MAPK8  |
| MOL000371 | 3,9-di-O-methyl | ADRA1D | MMP1   |
| MOL000371 | 3,9-di-O-methyl | OPRM1  | STAT1  |
| MOL000371 | 3,9-di-O-methyl | GABRA1 | CDK1   |
| MOL000371 | 3,9-di-O-methyl | PRSS1  | HMOX1  |
| MOL000371 | 3,9-di-O-methyl | NCOA2  | CYP3A4 |
| MOL000371 | 3,9-di-O-methyl | CALM   | UBE2O  |
| MOL000378 | 7-O-methylisom  | NOS2   | CYP1A1 |
| MOL000378 | 7-O-methylisom  | PTGS1  | ICAM1  |
| MOL000378 | 7-O-methylisom  | DRD1   | SELE   |
| MOL000378 | 7-O-methylisom  | CHRM3  | VCAM1  |
| MOL000378 | 7-O-methylisom  | F2     | NR1I2  |
| MOL000378 | 7-O-methylisom  | KCNH2  | CYP1B1 |

|           |                  |          |         |
|-----------|------------------|----------|---------|
| MOL000378 | 7-O-methylisomu  | CHRM1    | ALOX5   |
| MOL000378 | 7-O-methylisomu  | ESR1     | HAS2    |
| MOL000378 | 7-O-methylisomu  | AR       | AHR     |
| MOL000378 | 7-O-methylisomu  | ADRB1    | PSMD3   |
| MOL000378 | 7-O-methylisomu  | SCN5A    | SLC2A4  |
| MOL000378 | 7-O-methylisomu  | PPARG    | NR1I3   |
| MOL000378 | 7-O-methylisomu  | F10      | INSR    |
| MOL000378 | 7-O-methylisomu  | CHRM5    | DIO1    |
| MOL000378 | 7-O-methylisomu  | PTGS2    | PPP3CA  |
| MOL000378 | 7-O-methylisomu  | NOS3     | PRXC1A  |
| MOL000378 | 7-O-methylisomu  | ADRA2C   | GSTM1   |
| MOL000378 | 7-O-methylisomu  | CHRM4    | GSTM2   |
| MOL000378 | 7-O-methylisomu  | RXRA     | AKR1C3  |
| MOL000378 | 7-O-methylisomu  | OPRD1    | SLPI    |
| MOL000378 | 7-O-methylisomu  | PDE3A    | MMP3    |
| MOL000378 | 7-O-methylisomu  | HTR2A    | EGFR    |
| MOL000378 | 7-O-methylisomu  | ADRA1A   | CCND1   |
| MOL000378 | 7-O-methylisomu  | CHRM2    | BCL2L1  |
| MOL000378 | 7-O-methylisomu  | ADRA1B   | FOS     |
| MOL000378 | 7-O-methylisomu  | SLC6A3   | CDKN1A  |
| MOL000378 | 7-O-methylisomu  | ADRB2    | Eif6    |
| MOL000378 | 7-O-methylisomu  | ADRA1D   | CASP9   |
| MOL000378 | 7-O-methylisomu  | SLC6A4   | PLAU    |
| MOL000378 | 7-O-methylisomu  | ESR2     | MMP2    |
| MOL000378 | 7-O-methylisomu  | GABRA1   | MMP9    |
| MOL000378 | 7-O-methylisomu  | DPP4     | MAPK1   |
| MOL000378 | 7-O-methylisomu  | MAPK14   | IL10RA  |
| MOL000378 | 7-O-methylisomu  | GSK3B    | RB1     |
| MOL000378 | 7-O-methylisomu  | HSP90AA1 | IL6     |
| MOL000378 | 7-O-methylisomu  | CDK2     | TP53    |
| MOL000378 | 7-O-methylisomu  | CHEK1    | ELK1    |
| MOL000378 | 7-O-methylisomu  | PRKACA   | CHUK    |
| MOL000378 | 7-O-methylisomu  | PRSS1    | ODC1    |
| MOL000378 | 7-O-methylisomu  | PIM1     | CASP8   |
| MOL000378 | 7-O-methylisomu  | CCNA2    | TOP1    |
| MOL000378 | 7-O-methylisomu  | NCOA2    | RAF1    |
| MOL000378 | 7-O-methylisomu  | KCNMA1   | SOD1    |
| MOL000378 | 7-O-methylisomu  | CALM     | PRKCA   |
| MOL000379 | 9,10-dimethoxyp  | PTGS2    | HIF1AN  |
| MOL000379 | 9,10-dimethoxyp  | TOP2A    | RUNX1T1 |
| MOL000379 | 9,10-dimethoxyp  | NCOA2    | HSPA5   |
| MOL000380 | (6aR,11aR)-9,10- | NOS2     | ERBB2   |
| MOL000380 | (6aR,11aR)-9,10- | PTGS1    | ACACA   |
| MOL000380 | (6aR,11aR)-9,10- | CHRM3    | CAV1    |
| MOL000380 | (6aR,11aR)-9,10- | F2       | MYC     |
| MOL000380 | (6aR,11aR)-9,10- | CHRM1    | F3      |
| MOL000380 | (6aR,11aR)-9,10- | ESR1     | GJA1    |
| MOL000380 | (6aR,11aR)-9,10- | SCN5A    | IL1B    |
| MOL000380 | (6aR,11aR)-9,10- | PTGS2    | CCL2    |
| MOL000380 | (6aR,11aR)-9,10- | HTR3A    | PTGER3  |
| MOL000380 | (6aR,11aR)-9,10- | RXRA     | CXCL8   |
| MOL000380 | (6aR,11aR)-9,10- | ACHE     | Prkcb   |
| MOL000380 | (6aR,11aR)-9,10- | ADRA1B   | BIRC5   |

|           |                  |          |          |
|-----------|------------------|----------|----------|
| MOL000380 | (6aR,11aR)-9,10- | ADRB2    | DUOXA2   |
| MOL000380 | (6aR,11aR)-9,10- | ADRA1D   | HSPB1    |
| MOL000380 | (6aR,11aR)-9,10- | GABRA1   | TGFB1    |
| MOL000380 | (6aR,11aR)-9,10- | HSP90AA1 | MGAM     |
| MOL000380 | (6aR,11aR)-9,10- | CHRNA7   | IL2      |
| MOL000380 | (6aR,11aR)-9,10- | PRSS1    | CCNB1    |
| MOL000380 | (6aR,11aR)-9,10- | NCOA2    | PLAT     |
| MOL000380 | (6aR,11aR)-9,10- | NCOA1    | THBD     |
| MOL000380 | (6aR,11aR)-9,10- | CALM     | SERPINE1 |
| MOL000380 | (6aR,11aR)-9,10- | CHRM4    | IFNG     |
| MOL000387 | Bifendate        | PTGS2    | pteN     |
| MOL000387 | Bifendate        | KDR      | IL1A     |
| MOL000387 | Bifendate        | MET      | MPO      |
| MOL000387 | Bifendate        | HSP90AA1 | ABCA2    |
| MOL000387 | Bifendate        | KCNMA1   | NFE2L2   |
| MOL000387 | Bifendate        | PTGS1    | NQO1     |
| MOL000387 | Bifendate        | TOP2A    | TNKS     |
| MOL000392 | formononetin     | NOS2     | COL3A1   |
| MOL000392 | formononetin     | PTGS1    | GYRB1    |
| MOL000392 | formononetin     | CHRM1    | CXCL11   |
| MOL000392 | formononetin     | ESR1     | CXCL2    |
| MOL000392 | formononetin     | AR       | DCAF1    |
| MOL000392 | formononetin     | PPARG    | CHEK2    |
| MOL000392 | formononetin     | PTGS2    | CLDN4    |
| MOL000392 | formononetin     | RXRA     | PPARA    |
| MOL000392 | formononetin     | PDE3A    | HSF1     |
| MOL000392 | formononetin     | ADRA1A   | CRP      |
| MOL000392 | formononetin     | SLC6A3   | CXCL10   |
| MOL000392 | formononetin     | ADRB2    | SPP1     |
| MOL000392 | formononetin     | SLC6A4   | RUNX2    |
| MOL000392 | formononetin     | ESR2     | RASSF1   |
| MOL000392 | formononetin     | DPP4     | 2F1      |
| MOL000392 | formononetin     | MAPK14   | E2F2     |
| MOL000392 | formononetin     | GSK3B    | ACPP     |
| MOL000392 | formononetin     | HSP90AA1 | CTSD     |
| MOL000392 | formononetin     | CDK2     | IGFBP3   |
| MOL000392 | formononetin     | MAOB     | IGF2     |
| MOL000392 | formononetin     | CHEK1    | CD40LG   |
| MOL000392 | formononetin     | PRKACA   | IRF1     |
| MOL000392 | formononetin     | PRSS1    | ERBB3    |
| MOL000392 | formononetin     | PIM1     | PON1     |
| MOL000392 | formononetin     | CCNA2    | PCOLCE   |
| MOL000392 | formononetin     | CALM     | NPEPPS   |
| MOL000392 | formononetin     | PKIA     | HK2      |
| MOL000392 | formononetin     | F2       | NKX3-1   |
| MOL000392 | formononetin     | NOS3     | RASA1    |
| MOL000392 | formononetin     | ACHE     |          |
| MOL000392 | formononetin     | LACTB    |          |
| MOL000392 | formononetin     | JUN      |          |
| MOL000392 | formononetin     | PPARG    |          |
| MOL000392 | formononetin     | IL4R     |          |
| MOL000392 | formononetin     | SIRT1    |          |
| MOL000392 | formononetin     | ATP5B    |          |

|           |              |          |
|-----------|--------------|----------|
| MOL000392 | formononetin | MT-ND6   |
| MOL000392 | formononetin | HSD3B2   |
| MOL000392 | formononetin | HSD3B1   |
| MOL000417 | Calycosin    | NOS2     |
| MOL000417 | Calycosin    | PTGS1    |
| MOL000417 | Calycosin    | ESR1     |
| MOL000417 | Calycosin    | AR       |
| MOL000417 | Calycosin    | PPARG    |
| MOL000417 | Calycosin    | PTGS2    |
| MOL000417 | Calycosin    | RXRA     |
| MOL000417 | Calycosin    | PDE3A    |
| MOL000417 | Calycosin    | ESR2     |
| MOL000417 | Calycosin    | DPP4     |
| MOL000417 | Calycosin    | MAPK14   |
| MOL000417 | Calycosin    | GSK3B    |
| MOL000417 | Calycosin    | HSP90AA1 |
| MOL000417 | Calycosin    | CDK2     |
| MOL000417 | Calycosin    | CHEK1    |
| MOL000417 | Calycosin    | PRKACA   |
| MOL000417 | Calycosin    | PRSS1    |
| MOL000417 | Calycosin    | PIM1     |
| MOL000417 | Calycosin    | CCNA2    |
| MOL000417 | Calycosin    | NCOA2    |
| MOL000417 | Calycosin    | CALM     |
| MOL000417 | Calycosin    | ADRB2    |
| MOL000422 | kaempferol   | NOS2     |
| MOL000422 | kaempferol   | PTGS1    |
| MOL000422 | kaempferol   | AR       |
| MOL000422 | kaempferol   | PPARG    |
| MOL000422 | kaempferol   | PTGS2    |
| MOL000422 | kaempferol   | HSP90AA1 |
| MOL000422 | kaempferol   | PIK3CG   |
| MOL000422 | kaempferol   | PRKACA   |
| MOL000422 | kaempferol   | NCOA2    |
| MOL000422 | kaempferol   | DPP4     |
| MOL000422 | kaempferol   | PRSS1    |
| MOL000422 | kaempferol   | PGR      |
| MOL000422 | kaempferol   | F2       |
| MOL000422 | kaempferol   | CHRM1    |
| MOL000422 | kaempferol   | NOS3     |
| MOL000422 | kaempferol   | GABRA2   |
| MOL000422 | kaempferol   | ACHE     |
| MOL000422 | kaempferol   | SLC6A2   |
| MOL000422 | kaempferol   | CHRM2    |
| MOL000422 | kaempferol   | ADRA1B   |
| MOL000422 | kaempferol   | GABRA1   |
| MOL000422 | kaempferol   | TOP2A    |
| MOL000422 | kaempferol   | F7       |
| MOL000422 | kaempferol   | CALM     |
| MOL000422 | kaempferol   | RELA     |
| MOL000422 | kaempferol   | IKBKB    |
| MOL000422 | kaempferol   | AKT1     |
| MOL000422 | kaempferol   | BCL2     |

|           |                  |          |
|-----------|------------------|----------|
| MOL000422 | kaempferol       | BAX      |
| MOL000422 | kaempferol       | TNF      |
| MOL000422 | kaempferol       | JUN      |
| MOL000422 | kaempferol       | AHSA1    |
| MOL000422 | kaempferol       | CASP3    |
| MOL000422 | kaempferol       | MAPK8    |
| MOL000422 | kaempferol       | XDH      |
| MOL000422 | kaempferol       | MMP1     |
| MOL000422 | kaempferol       | STAT1    |
| MOL000422 | kaempferol       | CDK1     |
| MOL000422 | kaempferol       | PPARG    |
| MOL000422 | kaempferol       | HMOX1    |
| MOL000422 | kaempferol       | CYP3A4   |
| MOL000422 | kaempferol       | UBE2O    |
| MOL000422 | kaempferol       | CYP1A1   |
| MOL000422 | kaempferol       | ICAM1    |
| MOL000422 | kaempferol       | SELE     |
| MOL000422 | kaempferol       | VCAM1    |
| MOL000422 | kaempferol       | NR1I2    |
| MOL000422 | kaempferol       | CYP1B1   |
| MOL000422 | kaempferol       | ALOX5    |
| MOL000422 | kaempferol       | HAS2     |
| MOL000422 | kaempferol       | AHR      |
| MOL000422 | kaempferol       | PSMD3    |
| MOL000422 | kaempferol       | SLC2A4   |
| MOL000422 | kaempferol       | NR1I3    |
| MOL000422 | kaempferol       | INSR     |
| MOL000422 | kaempferol       | DIO1     |
| MOL000422 | kaempferol       | PPP3CA   |
| MOL000422 | kaempferol       | PRXC1A   |
| MOL000422 | kaempferol       | GSTM1    |
| MOL000422 | kaempferol       | GSTM2    |
| MOL000422 | kaempferol       | AKR1C3   |
| MOL000422 | kaempferol       | SLPI     |
| MOL000433 | FA               | CDK2     |
| MOL000433 | FA               | F2       |
| MOL000433 | FA               | GSK3B    |
| MOL000439 | isomucronulatol- | TOP2A    |
| MOL000442 | 1,7-Dihydroxy-3, | PTGS2    |
| MOL000442 | 1,7-Dihydroxy-3, | RXRA     |
| MOL000442 | 1,7-Dihydroxy-3, | HSP90AA1 |
| MOL000442 | 1,7-Dihydroxy-3, | PRSS1    |
| MOL000098 | quercetin        | PTGS1    |
| MOL000098 | quercetin        | AR       |
| MOL000098 | quercetin        | PPARG    |
| MOL000098 | quercetin        | PTGS2    |
| MOL000098 | quercetin        | HSP90AA1 |
| MOL000098 | quercetin        | PIK3CG   |
| MOL000098 | quercetin        | NCOA2    |
| MOL000098 | quercetin        | DPP4     |
| MOL000098 | quercetin        | AKR1B1   |
| MOL000098 | quercetin        | PRSS1    |
| MOL000098 | quercetin        | TOP2A    |

|           |           |         |
|-----------|-----------|---------|
| MOL000098 | quercetin | F2      |
| MOL000098 | quercetin | KCNH2   |
| MOL000098 | quercetin | SCN5A   |
| MOL000098 | quercetin | F10     |
| MOL000098 | quercetin | ADRB2   |
| MOL000098 | quercetin | MMP3    |
| MOL000098 | quercetin | PRKACA  |
| MOL000098 | quercetin | F7      |
| MOL000098 | quercetin | NOS3    |
| MOL000098 | quercetin | RXRA    |
| MOL000098 | quercetin | ACHE    |
| MOL000098 | quercetin | GABRA1  |
| MOL000098 | quercetin | MAOB    |
| MOL000098 | quercetin | RELA    |
| MOL000098 | quercetin | EGFR    |
| MOL000098 | quercetin | AKT1    |
| MOL000098 | quercetin | CCND1   |
| MOL000098 | quercetin | BCL2    |
| MOL000098 | quercetin | BCL2L1  |
| MOL000098 | quercetin | FOS     |
| MOL000098 | quercetin | CDKN1A  |
| MOL000098 | quercetin | Eif6    |
| MOL000098 | quercetin | BAX     |
| MOL000098 | quercetin | CASP9   |
| MOL000098 | quercetin | PLAU    |
| MOL000098 | quercetin | MMP2    |
| MOL000098 | quercetin | MMP9    |
| MOL000098 | quercetin | MAPK1   |
| MOL000098 | quercetin | IL10RA  |
| MOL000098 | quercetin | RB1     |
| MOL000098 | quercetin | TNF     |
| MOL000098 | quercetin | JUN     |
| MOL000098 | quercetin | IL6     |
| MOL000098 | quercetin | CHEK1   |
| MOL000098 | quercetin | AHSA1   |
| MOL000098 | quercetin | CASP3   |
| MOL000098 | quercetin | TP53    |
| MOL000098 | quercetin | ELK1    |
| MOL000098 | quercetin | CHUK    |
| MOL000098 | quercetin | ODC1    |
| MOL000098 | quercetin | XDH     |
| MOL000098 | quercetin | CASP8   |
| MOL000098 | quercetin | TOP1    |
| MOL000098 | quercetin | RAF1    |
| MOL000098 | quercetin | SOD1    |
| MOL000098 | quercetin | PRKCA   |
| MOL000098 | quercetin | MMP1    |
| MOL000098 | quercetin | HIF1AN  |
| MOL000098 | quercetin | STAT1   |
| MOL000098 | quercetin | RUNX1T1 |
| MOL000098 | quercetin | CDK1    |
| MOL000098 | quercetin | HSPA5   |
| MOL000098 | quercetin | ERBB2   |

|           |           |          |
|-----------|-----------|----------|
| MOL000098 | quercetin | PPARG    |
| MOL000098 | quercetin | ACACA    |
| MOL000098 | quercetin | HMOX1    |
| MOL000098 | quercetin | CYP3A4   |
| MOL000098 | quercetin | CAV1     |
| MOL000098 | quercetin | MYC      |
| MOL000098 | quercetin | F3       |
| MOL000098 | quercetin | GJA1     |
| MOL000098 | quercetin | CYP1A1   |
| MOL000098 | quercetin | ICAM1    |
| MOL000098 | quercetin | IL1B     |
| MOL000098 | quercetin | CCL2     |
| MOL000098 | quercetin | SELE     |
| MOL000098 | quercetin | VCAM1    |
| MOL000098 | quercetin | PTGER3   |
| MOL000098 | quercetin | CXCL8    |
| MOL000098 | quercetin | Prkcb    |
| MOL000098 | quercetin | BIRC5    |
| MOL000098 | quercetin | DUOXA2   |
| MOL000098 | quercetin | NOS3     |
| MOL000098 | quercetin | HSPB1    |
| MOL000098 | quercetin | TGFB1    |
| MOL000098 | quercetin | MGAM     |
| MOL000098 | quercetin | IL2      |
| MOL000098 | quercetin | NR1H2    |
| MOL000098 | quercetin | CYP1B1   |
| MOL000098 | quercetin | CCNB1    |
| MOL000098 | quercetin | PLAT     |
| MOL000098 | quercetin | THBD     |
| MOL000098 | quercetin | SERPINE1 |
| MOL000098 | quercetin | IFNG     |
| MOL000098 | quercetin | ALOX5    |
| MOL000098 | quercetin | pteN     |
| MOL000098 | quercetin | IL1A     |
| MOL000098 | quercetin | MPO      |
| MOL000098 | quercetin | TOP2A    |
| MOL000098 | quercetin | NCF1     |
| MOL000098 | quercetin | ABCA2    |
| MOL000098 | quercetin | HAS2     |
| MOL000098 | quercetin | NFE2L2   |
| MOL000098 | quercetin | NQO1     |
| MOL000098 | quercetin | TNKS     |
| MOL000098 | quercetin | AHR      |
| MOL000098 | quercetin | PSMD3    |
| MOL000098 | quercetin | SLC2A4   |
| MOL000098 | quercetin | COL3A1   |
| MOL000098 | quercetin | GYRB1    |
| MOL000098 | quercetin | CXCL11   |
| MOL000098 | quercetin | CXCL2    |
| MOL000098 | quercetin | DCAF1    |
| MOL000098 | quercetin | NR1H3    |
| MOL000098 | quercetin | CHEK2    |
| MOL000098 | quercetin | INSR     |



|           |           |        |
|-----------|-----------|--------|
| MOL000098 | quercetin | CLDN4  |
| MOL000098 | quercetin | PPARA  |
| MOL000098 | quercetin | PPARD  |
| MOL000098 | quercetin | HSF1   |
| MOL000098 | quercetin | CRP    |
| MOL000098 | quercetin | CXCL10 |
| MOL000098 | quercetin | CHUK   |
| MOL000098 | quercetin | SPP1   |
| MOL000098 | quercetin | RUNX2  |
| MOL000098 | quercetin | RASSF1 |
| MOL000098 | quercetin | 2F1    |
| MOL000098 | quercetin | E2F2   |
| MOL000098 | quercetin | ACPP   |
| MOL000098 | quercetin | CTSD   |
| MOL000098 | quercetin | IGFBP3 |
| MOL000098 | quercetin | IGF2   |
| MOL000098 | quercetin | CD40LG |
| MOL000098 | quercetin | IRF1   |
| MOL000098 | quercetin | ERBB3  |
| MOL000098 | quercetin | PON1   |
| MOL000098 | quercetin | DIO1   |
| MOL000098 | quercetin | PCOLCE |
| MOL000098 | quercetin | NPEPPS |
| MOL000098 | quercetin | HK2    |
| MOL000098 | quercetin | NKX3-1 |
| MOL000098 | quercetin | RASA1  |
| MOL000098 | quercetin | PRXC1A |
| MOL000098 | quercetin | GSTM1  |
| MOL000098 | quercetin | GSTM2  |
