# Supplementary material for: Explore the Mechanism of Astragalus mongholicus Bunge against Nonalcoholic Fatty Liver Disease Based on Network Pharmacology and Experimental Verification
Source: Hindawi journal article supplement (doi:10.1155/2022/4745042), 2022-04-05
Supplement: f1 [file 4745042.f1.zip]

| <b>AM-related targets</b> | <b>NAFLD-related targets</b> | <b>common targets of AM and NAFLD</b> |
|---------------------------|------------------------------|---------------------------------------|
| PGR                       | PNPLA3                       | XDH                                   |
| NOS2                      | IL6                          | VCAM1                                 |
| PTGS1                     | APOE                         | TP53                                  |
| AR                        | PRMT7                        | TNF                                   |
| SCN5A                     | MIR122                       | THBD                                  |
| PTGS2                     | TNF                          | TGFB1                                 |
| ESR2                      | TP53                         | STAT1                                 |
| DPP4                      | PKD2                         | SPP1                                  |
| HSP90AA1                  | INS                          | SOD1                                  |
| CDK2                      | HFE                          | SLC6A4                                |
| CHEK1                     | ALB                          | SLC6A3                                |
| PRSS1                     | IL10                         | SLC2A4                                |
| NCOA2                     | PPARG                        | SIRT1                                 |
| CALM                      | HADHA                        | SERPINE1                              |
| CHRM3                     | TGFB1                        | SELE                                  |
| CHRM1                     | LMNA                         | RXRA                                  |
| GABRA2                    | MARS1                        | RELA                                  |
| GABRA3                    | FABP1                        | PTPN1                                 |
| CHRM2                     | SMPD1                        | PTGS2                                 |
| ADRA1B                    | SLC17A5                      | PTEN                                  |
| GABRA1                    | SERPINA1                     | PRSS1                                 |
| GRIA2                     | FASN                         | PRKCA                                 |
| GABRA6                    | MIR21                        | PPP3CA                                |
| GABRA5                    | ATP7B                        | PPARG                                 |
| IGHG1                     | GPT                          | PPARD                                 |
| LYZ                       | FAS                          | PPARA                                 |
| COBT                      | ABCB11                       | PON1                                  |
| RXRA                      | GANAB                        | PLAU                                  |
| PDE3A                     | APOA1                        | OPRM1                                 |
| SLC6A2                    | CTNNB1                       | OPRD1                                 |
| NOR51B                    | PPARA                        | NR1I3                                 |
| ESR1                      | IL1B                         | NR1I2                                 |
| PPARG                     | MIR34A                       | NQO1                                  |
| PTPN1                     | APOB                         | NOS2                                  |
| MAPK14                    | NAFLD1                       | NFE2L2                                |
| GSK3B                     | ADIPOQ                       | MYC                                   |
| PIK3CG                    | NOD2                         | MT-ND6                                |
| PRKACA                    | MIR10B                       | MPO                                   |
| PIM1                      | LIPA                         | MMP9                                  |
| CCNA2                     | PIK3CA                       | MMP2                                  |
| PYGM                      | CPT2                         | MMP1                                  |
| PPARD                     | TLR4                         | MGAM                                  |
| AKR1B1                    | SQSTM1                       | MAPK8                                 |
| NCOA1                     | CRP                          | MAPK14                                |
| F7                        | NR1H4                        | LDLR                                  |
| F2                        | MFN2                         | JUN                                   |
| NOS3                      | CPT1A                        | IRF1                                  |
| ACHE                      | ABCA1                        | INSR                                  |
| MAOB                      | APP                          | IL6                                   |
| RELA                      | MIR17                        | IL1B                                  |
| XDH                       | G6PC1                        | IL1A                                  |
| NCF1                      | KRT18                        | IKBKB                                 |
| LDLR                      | MIR155                       | IGHG1                                 |
| ADRB1                     | CXCL8                        | IGFBP3                                |
| HTR3A                     | AKT1                         | IFNG                                  |
| ADRA2C                    | LPL                          | ICAM1                                 |

|        |          |          |
|--------|----------|----------|
| ADRB2  | PTEN     | HTR2A    |
| ADRA1D | CD36     | HSPB1    |
| OPRM1  | CTLA4    | HSPA5    |
| DRD1   | GGT1     | HSP90AA1 |
| KCNH2  | HNF4A    | HMOX1    |
| F10    | CYP2E1   | GSTM1    |
| CHRM5  | LEP      | GSK3B    |
| CHRM4  | VWF      | GABRA2   |
| OPRD1  | VCP      | FOS      |
| HTR2A  | FABP4    | F3       |
| ADRA1A | SREBF1   | F2       |
| SLC6A3 | F2       | ESR1     |
| SLC6A4 | MTTP     | ELK1     |
| KCNMA1 | INSR     | EGFR     |
| TOP2A  | IFNG     | DRD1     |
| CHRNA7 | NR1H3    | DPP4     |
| KDR    | CFTR     | CYP3A4   |
| MET    | ACE      | CYP1B1   |
| PKIA   | TERT     | CYP1A1   |
| LACTB  | FABP2    | CXCL8    |
| JUN    | MIR146A  | CXCL11   |
| IL4R   | ACOX1    | CXCL10   |
| SIRT1  | ABCB4    | CTSD     |
| ATP5B  | SERPINE1 | CRP      |
| MT-ND6 | EGFR     | COL3A1   |
| HSD3B2 | CASP8    | CHUK     |
| HSD3B1 | IGF1     | CHRM3    |
| IKBKB  | CYBB     | CDKN1A   |
| AKT1   | STAT3    | CCND1    |
| BCL2   | RBP4     | CCL2     |
| BAX    | HMOX1    | CAV1     |
| TNF    | HLA-DQB1 | CASP9    |
| AHSA1  | HBB      | CASP8    |
| CASP3  | TTR      | CASP3    |
| MAPK8  | IRS1     | BIRC5    |
| MMP1   | EGF      | BCL2     |
| STAT1  | SLC25A13 | BAX      |
| CDK1   | IL1A     | AKT1     |
| HMOX1  | AFP      | AHSA1    |
| CYP3A4 | TLR2     | AHR      |
| UBE2O  | KRT8     | ADRB2    |
| CYP1A1 | ABHD5    | ADRB1    |
| ICAM1  | MIR27A   | ACACA    |
| SELE   | LEPR     |          |
| VCAM1  | CASP3    |          |
| NR1I2  | CCL2     |          |
| CYP1B1 | SOD1     |          |
| ALOX5  | MTHFR    |          |
| HAS2   | BSCL2    |          |
| AHR    | PPARGC1A |          |
| PSMD3  | MIR29A   |          |
| SLC2A4 | VEGFA    |          |
| NR1I3  | MIR200B  |          |
| INSR   | MIR203A  |          |
| DIO1   | RETN     |          |
| PPP3CA | PON1     |          |
| PRXC1A | JAG1     |          |
| GSTM1  | MMP9     |          |

|          |          |
|----------|----------|
| GSTM2    | GARS1    |
| AKR1C3   | YARS1    |
| SLPI     | SMAD4    |
| MMP3     | CYP3A4   |
| EGFR     | FADS2    |
| CCND1    | LDLR     |
| BCL2L1   | FABP3    |
| FOS      | HSPB1    |
| CDKN1A   | UCP2     |
| Eif6     | MMP1     |
| CASP9    | MIR22    |
| PLAU     | NOTCH1   |
| MMP2     | IL18     |
| MMP9     | SOD2     |
| MAPK1    | MPO      |
| IL10RA   | SCD      |
| RB1      | CYBA     |
| IL6      | CFH      |
| TP53     | MLXIPL   |
| ELK1     | CAV1     |
| CHUK     | MAPK8    |
| ODC1     | PNPLA2   |
| CASP8    | TNFRSF1A |
| TOP1     | CP       |
| RAF1     | SERPINA3 |
| SOD1     | SPP1     |
| PRKCA    | MIR20A   |
| HIF1AN   | BRCA2    |
| RUNX1T1  | UGT1A1   |
| HSPA5    | MTOR     |
| ERBB2    | RELA     |
| ACACA    | SIRT1    |
| CAV1     | APOC3    |
| MYC      | DNAJB11  |
| F3       | ACACA    |
| GJA1     | ELOVL6   |
| IL1B     | PRKAG2   |
| CCL2     | ABCC2    |
| PTGER3   | LIPC     |
| CXCL8    | ICAM1    |
| Prkcb    | CCND1    |
| BIRC5    | MIR126   |
| DUOXA2   | HAMP     |
| HSPB1    | HMGCR    |
| TGFB1    | TF       |
| MGAM     | HGF      |
| IL2      | NFKB1    |
| CCNB1    | ANO5     |
| PLAT     | LCAT     |
| THBD     | CAT      |
| SERPINE1 | MIR221   |
| IFNG     | PTGS2    |
| pteN     | TIMP1    |
| IL1A     | IRS2     |
| MPO      | ESR1     |
| ABCA2    | FASLG    |
| NFE2L2   | IL1RN    |
| NQO1     | XBP1     |

TNKS  
COL3A1  
GYRB1  
CXCL11  
CXCL2  
DCAF1  
CHEK2  
CLDN4  
PPARA  
HSF1  
CRP  
CXCL10  
SPP1  
RUNX2  
RASSF1  
2F1  
E2F2  
ACPP  
CTSD  
IGFBP3  
IGF2  
CD40LG  
IRF1  
ERBB3  
PON1  
PCOLCE  
NPEPPS  
HK2  
NKX3-1  
RASA1

PTPN11  
MIR132  
MIR222  
ADIPOR1  
CDKN2A  
DDIT3  
ADIPOR2  
LITAF  
CYCS  
SDHB  
STAT1  
MT-CYB  
BDNF  
HP  
MIR140  
AGT  
TM6SF2  
MMP2  
ENPP1  
TGFB2  
FOS  
NOS2  
MIR181A1  
JUN  
MYC  
FABP12  
CYP1A1  
SLC27A2  
TARDBP  
IL17A  
SDHD  
SLC2A1  
NR1H2  
GCKR  
GFER  
MT-CO1  
TNFRSF11B  
PEMT  
COL1A1  
MIR107  
SLC40A1  
CEBPA  
CETP  
NDUFS1  
PLAU  
CYP1A2  
DGAT1  
MIR29C  
GSTP1  
SLC27A4  
IFNA1  
AKT2  
GSTM1  
GCG  
GRN  
AKR1D1  
PCSK9  
VDR

HNRNPA1  
ALMS1  
SMAD3  
MIR195  
CDKN3  
GCK  
AHSG  
CTSD  
SLC27A1  
MAP3K5  
NLRP3  
TFR2  
AGTR1  
DSP  
SLC2A4  
DPP4  
MT-CO3  
SERPINC1  
CASR  
CES1  
APOA5  
MIR31  
C3  
MIR30A  
PIK3R1  
MIR200A  
MIR23B  
SOCS3  
MIR181B1  
BAX  
CCN2  
THBD  
ADH1C  
LIPE  
F3  
MIR199A1  
NAMPT  
ALDH2  
PKLR  
CYP7A1  
ATP2A2  
ASS1  
ACTB  
NDUFS4  
SDHA  
FN1  
GHRL  
SMARCA4  
IKBKB  
NDUFV1  
SREBF2  
ACACB  
HIF1A  
HJV  
FGF21  
ALPL  
GSK3B  
CYP2A6

MT-ND3  
AGPAT2  
MIR224  
MSH6  
MT-ND6  
IL6R  
BMP6  
HSPD1  
FFAR4  
TNFRSF1B  
PRKAB1  
PRKAA1  
BCL2  
COX5A  
H19  
ELANE  
RARRES2  
UGT1A7  
VIM  
ITCH  
AIFM1  
CDKN1A  
FGF23  
PLIN2  
MIR200C  
FGA  
A2M  
MIR125A  
MT-CO2  
BTNL2  
LPA  
SDHC  
SELE  
IGF1R  
NR1I2  
FTL  
PDGFRB  
UGT1A6  
MSR1  
NPPB  
CXCL10  
IFIH1  
XDH  
ATF4  
MYH9  
TGFB1  
IDH1  
KRT7  
KRT19  
ADA2  
POMC  
NFE2L2  
ALPP  
TLR9  
MIR130A  
MAPK14  
PRKCQ  
VCAM1

UGT1A8  
NDUFS2  
FGF19  
ERN1  
SPINK1  
EIF2AK4  
BGLAP  
CCL5  
TBP  
MIR16-1  
MIR29B1  
IFNA2  
NDUFS7  
SHH  
MIRLET7D  
EIF2S1  
LCN2  
UGT1A9  
HBA1  
RXRA  
SELP  
CNR1  
CXCR4  
MIRLET7C  
LGALS3  
TET2  
EP300  
TCF7L2  
ADRB2  
NDUFV2  
MIR33A  
MST1  
COX6A1  
LIVAR  
CD14  
FLT1  
LRP6  
MIR26A1  
EIF2AK3  
TNFAIP3  
IGFBP3  
MIR141  
MIR183  
NDUFB9  
ERCC2  
TNFSF11  
MIR144  
MDM2  
MIR451A  
CPS1  
DGAT2  
SHBG  
CTSB  
NR5A2  
DNMT1  
CD44  
APOA2  
CHIT1

COL3A1  
IL21  
CLU  
ABCB7  
UGT1A4  
NDUFS3  
GHR  
MYD88  
MIR182  
SLC10A1  
COPA  
UQCRB  
SCARB1  
PC  
PPARD  
LOX  
NGF  
PLA2G4A  
CDH2  
MIRLET7E  
IL1R1  
IGFBP1  
UGT1A10  
CYP4A11  
MIR151A  
TIMP2  
PPIG  
GH1  
ACSL3  
SLC6A3  
CDK4  
CRYAA  
ERBB4  
TNFSF10  
EPHX1  
UGT1A3  
IL18BP  
HSPA5  
SLC6A4  
SIRT3  
NPY  
SPARC  
MIR378A  
ADH1B  
KHK  
CEL  
MIR192  
GNMT  
MIR429  
UCP3  
MEG3  
CRAT  
NDUFA13  
CYP1B1  
NEU1  
IL15  
NAT2  
FNDC5



NDUFA1  
GLUD1  
CASP9  
GC  
PRKAA2  
GSTT1  
EIF4G1  
CYP2B6  
EPRS1  
CHUK  
SERPINF2  
SERPINA6  
PARP1  
MIR30D  
AGER  
MIR483  
DKK1  
S100A9  
SDCCAG8  
EZH2  
LRPPRC  
MIR205  
CCL3  
SP1  
CEBPB  
SOST  
CSF1  
NDUFS8  
FGFR4  
DRD2  
TMPRSS6  
RAC1  
HSD11B1  
RPS27A  
UCP1  
PIK3CD  
CCR1  
NPC1L1  
MIR27B  
NR0B2  
IFNL3  
LOC110806263  
MIR214  
NR1I3  
AHR  
KL  
PRL  
GSR  
SUMF1  
SERPINH1  
NDUFA6  
ABCC3  
LTBP3  
HTR2A  
GPX1  
AKT3  
BLVRA  
DNMT3A

NDUFA10  
MIR9-1  
EPHX2  
CD163  
COX4I1  
HSP90AA1  
IRGM  
IRF1  
HMGB1  
DYSF  
DNASE1  
NDUFB8  
FGB  
MMP13  
CXCR3  
FLI1  
LMBRD1  
SERPINF1  
NQO1  
PRKCA  
UGT1A5  
ANGPTL3  
NDUFB11  
NDUFS6  
BIRC5  
AKR1A1  
MERTK  
MAPK10  
PRSS1  
CCK  
HSPG2  
GDF15  
CDC42  
MAOA  
NDUFA12  
GSS  
COX6B1  
NDUFB3  
HDAC9  
ATP1A1  
ABCG1  
GOT2  
CHI3L1  
MATR3  
CD55  
CCL20  
COX8A  
UQCRC2  
THBS1  
ETS1  
PEPD  
ACSM2B  
EIF2AK2  
MIR149  
PLCB1  
FOXO1  
CA2  
DDX3X

SNAI2  
PLIN1  
ALOX12  
FARSA  
RPS6KB1  
DICER1  
BMPR1A  
CNTNAP2  
CPOX  
DNAH11  
PIK3R2  
IRF8  
CYP17A1  
PLAUR  
SDC1  
PLTP  
POR  
ADRB3  
ALAD  
TGM2  
STAR  
SMAD7  
MYH14  
MT-TT  
KEAP1  
NOS1  
PPP3CA  
CD68  
GOLM1  
KLF6  
TPM2  
DBH  
CES2  
HCFC1  
MIR15B  
LEPQTL1  
IL6ST  
UBD  
PRDX1  
NEAT1  
SULT2A1  
MIR24-1  
HDAC1  
FDFT1  
CYP4F2  
MIR154  
RPS6KA3  
CD59  
LNCARSR  
CASP7  
SHC1  
HDAC8  
STAT5A  
ANGPTL8  
MIR331  
NDUFA11  
NDUFAB1  
POSTN

SI  
GABRG2  
NDUFA9  
CCL4  
OSM  
TXNRD2  
IRF3  
NDUFA2  
TLR1  
TXN  
IL33  
CYC1  
FYN  
GPC4  
CANX  
IAH1  
TSPO  
WNT3A  
RB1CC1  
CRH  
PIK3CB  
IL17RA  
ATF6  
ERLIN1  
MIR125B1  
OGG1  
HNRNPK  
LBP  
APPL1  
PHB  
CLTC  
CCR2  
MBOAT7  
GCLC  
PKM  
CIDEA  
TPM3  
IARS1  
ATP5F1E  
PTPN1  
FTO  
ANXA2  
OLR1  
GSK3A  
COX6A2  
DRD1  
GPBAR1  
HSPA1A  
E2F1  
MIR95  
ASCL1  
TFEB  
ARPC1B  
DRD4  
IL1RAPL2  
TPM1  
IL11  
NDUFB10

IGFBP2  
CFLAR  
NTS  
DPM1  
STUB1  
XRCC4  
RPL5  
CYP2J2  
SERPINA7  
DRD3  
SF3B1  
ACE2  
MDH2  
CDK8  
SCAP  
COL12A1  
PALLD  
MAPK9  
CLCN2  
COX7A2  
SRD5A2  
HUWE1  
LPIN1  
SLC25A1  
UQCRRS1  
MIR187  
DHCR24  
FGL1  
HNRNPU  
VTN  
FOXC2  
GREM1  
EGR1  
RDH5  
LECT2  
UBQLN4  
CYP4F3  
RUNX3  
STING1  
SPTAN1  
IGF2BP2  
FOXF1  
HYOU1  
CNR2  
PRPF8  
PTX3  
ACLY  
GAL  
EPAS1  
BCL2L1  
ADH5  
P2RX7  
UQCRQ  
SFRP4  
NOX4  
PHGDH  
TKT  
ITGA8

LPCAT3  
IFNAR1  
CPB2  
CLRN1  
TLR6  
AREG  
RARS1  
SOD3  
P4HB  
HNMT  
BIRC3  
MAP3K7  
MIR30C1  
ENPP2  
JCAD  
RTN4  
COX4I2  
NNMT  
IL16  
TRAPPC9  
SERPINB3  
MYL2  
IL18RAP  
ADH1A  
CUL3  
TRIB1  
JAZF1  
OGT  
PDK4  
GFPT1  
USF1  
COLGALT1  
CYGB  
APEX1  
MATN3  
MIR423  
PIK3R3  
PDGFA  
MLX  
NDUFC2  
RORA  
SLC39A14  
MGAM  
NLRC4  
MIR30B  
TRIM21  
NOS1AP  
SNRNP200  
CACNA2D1  
PRPF3  
PRDX5  
GOT1  
CYLD  
WWTR1  
AOC3  
AZGP1  
SLC25A12  
CFL1

TMPO  
PARVB  
BID  
APLN  
NCAN  
SLC9A9  
PER2  
COL13A1  
ALDH9A1  
GLP1R  
CD82  
TYSND1  
FOXA1  
PLIN5  
DISC1  
COMMD1  
EFTUD2  
PDXK  
CDH4  
GPI  
YWHAE  
SLC1A3  
COX7B  
CYP8B1  
ITPR2  
TRAP1  
MIR103A1  
YWHAQ  
PRKAG1  
MYH10  
CXCR5  
YY1  
PIN1  
PRKDC  
XRCC6  
CASP2  
EEA1  
CDH5  
UQCRC1  
HSD17B13  
PTPRD  
RPL10  
HPS1  
RPS15  
AXL  
NCOA3  
SLC39A4  
SLC4A4  
SIRT6  
SLC25A22  
TNFRSF4  
EDA  
ADRB1  
XRCC5  
SAMM50  
IMMT  
SIK1  
ALPI

ERLIN2  
CHRM3  
LCN1  
SERPINA12  
CLDN2  
TXNRD1  
NAT1  
SLC34A2  
MIR363  
EEF1A1  
PRKACG  
CXCL11  
TNC  
AKR1B10  
OPRM1  
RPS17  
GPNMB  
ITLN1  
PIIB  
GPC6  
PRKAB2  
APOF  
EIF3F  
CISD2  
TRAF2  
HSP90B1  
MYO6  
MOGAT2  
GRK2  
NDUFA4  
FUNDG2  
SNTA1  
AMPH  
ZNF365  
NDUFC2-KCTD14  
AHNAK  
CCN1  
MIR361  
NRG3  
ARNT  
DMGDH  
PSMC2  
KAT5  
YWHAG  
MACROD2  
SLC44A1  
CCT5  
IL27  
MIR590  
RPL27  
LOXL2  
TP53BP1  
HSPA6  
SLC25A47  
SIRT4  
DCLK1  
IGFBP7  
AQP9



DROSHA  
STEAP4  
TAGLN  
PZP  
TLL1  
IGFBP5  
PRSS2  
NFIC  
TRAF1  
ATP5F1B  
RBFOX1  
PPP2CA  
TSHB  
TRAF3  
SRSF1  
ATAD3A  
IGHG1  
FST  
LOC110806262  
H4-16  
GPT2  
UGDH  
RPS15A  
PEG10  
DGCR8  
OSMR  
RPL7  
AFAP1-AS1  
AUP1  
PUF60  
MYH2  
CD5L  
MYO1B  
ELK1  
LGALS3BP  
AQP3  
GPLD1  
GABRA2  
SEMA5A  
UBE2D2  
CAD  
IFNL4  
PSMD2  
MAP3K11  
SIPA1L2  
SDC2  
MMP11  
PARD3  
KHDRBS3  
CMKLR1  
MYF5  
SORCS3  
HNRNPC  
UFM1  
CARS1  
ADAMTS9  
NDRG2  
CFD

PTBP1  
SLC38A8  
ONECUT2  
RIPK3  
PYCARD  
CCL19  
RPTOR  
HS3ST1  
LCP1  
TFAP2B  
MAP3K8  
SLC25A3  
MAPK12  
PNLIPRP2  
YEATS2  
DARS1  
H1-4  
INSIG1  
CXCL16  
LAMP3  
BIRC2  
SLC25A10  
INSIG2  
H4C1  
PTPRG  
NDUFS5  
BNIP3  
GLO1  
SOCS2  
YBX1  
IRF2BP2  
ATXN2L  
YWHAB  
ATF3  
PRKCE  
NDUFA8  
UQCR11  
CCRL2  
NDUFA5  
PCLO  
PCSK5  
MIR103A2  
CAMKK2  
SVIL  
SIRT5  
CTBP2  
USP7  
CYP2A13  
TRIB3  
NGF-AS1  
TPM4  
CALD1  
ESM1  
RPL13  
KLB  
RPN1  
APLNR  
RPLP2

NUDT4  
TET1  
H4C11  
H4C8  
SLC6A9  
SNHG20  
H4C4  
TPT1  
RPL7A  
RPL6  
PTPRU  
FARP1  
CBLB  
SAT1  
YBX3  
CCNC  
NDUFB7  
IL1R2  
SRSF6  
YIPF1  
MIR33B  
PABPC1  
HNRNPH1  
TSBP1-AS1  
NFE2L1  
RPS11  
H4C9  
IL34  
AP2B1  
RPS18  
AQP7  
SLC3A2  
H4C3  
MCM3  
ST8SIA1  
H4C2  
H4C13  
H4C6  
ROCK1  
H4C14  
H4C15  
H4C12  
EHBP1L1  
PRKAG3  
H4C5  
BCAT1  
FAP  
ESRRG  
FRK  
UQCR10  
CYP2F1  
LAPTM4A  
RPL10A  
NCL  
TTF2  
SLC46A3  
TNR  
NDUFB6

FETUB  
RPL3  
RPL12  
MRTFA  
CTSS  
AEBP1  
PDGFC  
PFKFB3  
SUGP1  
FAF2  
RPS23  
YWHAZ  
CWF19L1  
HSP90AB1  
HNRNPF  
GCN1  
PCBP2  
ZP4  
RPL30  
NMT2  
COX5B  
INHBA  
PCBP1  
COX7A2L  
HLX  
MIR372  
CLRN1-AS1  
FAM107B  
DNAJA1  
DISC2  
PPP1CA  
ANXA9  
SORCS2  
POMP  
HNRNPM  
GGT2  
TMBIM1  
RPS2  
SLC25A11  
GPN1  
CREB5  
SERPINA4  
NDUFA3  
RPS9  
BICD1  
MYO18A  
NRG4  
HTR1B  
HSPH1  
MIR449A  
IGF2BP1  
TRIM33  
DDX1  
CTPS1  
VIL1  
AGAP1  
HNRNPA3  
TUBA8

CCAR2  
AHSA1  
RANGAP1  
DHX9  
HNRNPUL1  
TMSB4X  
CRTCL  
TNFRSF12A  
TARBP1  
LEPROT  
NFE2  
BBC3  
ITSN1  
COX6C  
NDUFB4  
DDX5  
POLR3H  
APPL2  
RPS4X  
PNPLA7  
DDX60L  
PSG1  
FOXK1  
MCM5  
RPS3A  
RPL4  
RPL8  
HNRNPPL  
RPL9  
MCM7  
C1QTNF1  
SLC23A1  
CCN4  
POLR2D  
SEL1L3  
STK24  
PGAM5  
STX17  
AP2A2  
CCT4  
MCF2L2  
NDUFB5  
TXNL1  
STMP1  
MYO1D  
QARS1  
UQCRH  
NDUFB2  
SNRPD2  
LOC110366354  
CAND1  
SLC23A2  
ORM1  
RPL24  
ILF3  
CRACR2A  
ARRDC3  
SLC30A6

ACTR2  
RUVBL1  
EDC4  
G0S2  
RNF114  
HKDC1  
NDUFV3  
EIF4A3  
TP53BP2  
TLCD4-RWDD3  
PLPPR4  
COX7C  
PDIA4  
NDUFC1  
SERPINB4  
NUCB2  
MIR873  
SFRP5  
SLC30A9  
COX7A1  
SRSF7  
PKNOX1  
SP4  
TUBA1C  
SEC16B  
CILP2  
EIF4A1  
GATAD2A  
AP2A1  
ZNF512  
PABIR1  
MTARC1  
NDUFA7  
SEN3  
LOC101928118  
ACTR3  
GRIK3  
SIRT7  
MIR1296  
C2orf16  
CCT8  
RWDD3  
COX8C  
SDK1  
BMP8B  
NDUFB1  
TEX36  
EIF3B  
DDX50  
PSME2  
NUDT21  
OPRD1  
FAM171A1  
MYO1C  
DNAJC15  
FAT1  
PHF2  
MACROH2A2

CHST2  
RPS8  
RPL23A  
ZFP90  
SEC16A  
MAPK13  
IL36A  
TCP1  
RGS4  
RTRAF  
RRBP1  
SRRM1  
CCT2  
AATF  
PIP5K1B  
USP48  
RUVBL2  
PCSK7  
LOC643339  
OSBPL5  
CCT3  
C1QTNF9  
TLCD4  
SRSF4  
GSTK1  
ENHO  
TMC4  
TMBIM6  
RBM14  
KIF16B  
SVIL-AS1  
RAB37  
NDUFA4L2  
DDX17  
RND3  
TMOD3  
CARD6  
GSDMD  
XPO4  
UBE2D3  
SF3B3  
PDE7B  
RNU6-53P  
FOXN3  
CIDEA  
IBTK  
EIF3L  
TRMT44  
SLC9A4  
RLN2  
NLRP2  
PLPP7  
WSPAR  
USP4  
C1QTNF3  
UBXN1  
LINC00917  
ADAMTS9-AS2

CIDEB  
EIF3E  
ARPC2  
KRTAP5-5  
KLHL6  
HSD17B11  
SLC26A6  
COX7B2  
VSIG4  
SNHG18  
ILF2  
HIGD1A  
MYBBP1A  
PWWP3A  
GGT3P  
ANKK1  
MAU2  
LOC101929710  
ZBTB7A  
MIR1183  
CDH26  
AGR3  
COL21A1  
SMOC2  
PABPC4  
LRRFIP2  
CNOT4  
CKAP4  
SUB1  
BECN2  
COX6B2  
USP10  
LATS2  
HSALNG0013825  
ACTR5  
CCDC63  
FAM3B  
DDX60  
TSNAX-DISC1  
SRRM2  
GGT5  
LINC01405  
LINC01016  
SH3BP5  
MYL6B  
ZNF101  
RESF1  
STRA8  
FAM3A  
MLXIP  
DEFA1  
DDX46  
KDM4B  
UQCRHL  
MIR646HG  
EIF4A2  
ARL2BPP6  
ZNF267



ENSG00000231487  
C16orf95  
lnc-TM6SF2-1  
ENSG00000267629  
MIR6090  
IL36B  
ETS1-AS1  
ARHGAP8  
RSPO3  
A2MP1  
GLT8D2  
RAB32  
HIF3A  
TMEM97  
TRPC4AP  
LINC02694  
SMIM20  
RNU6-961P  
DHX15  
LINC01354  
RUBCNL  
GBX2  
ENSG00000253111  
SDF2L1  
EBNA1BP2  
HSALNG0013412  
lnc-COA6-13  
RF00017-457  
LINC01679  
RTCB  
DUSP26  
CAPSL  
ENSG00000231992  
SLC2A8  
FECHP1  
LINC00322  
CENPM  
LOC644135  
LOC101928135  
ENSG00000287092  
COP1  
LOC389199  
INPP4B  
ENSG00000228852  
ENSG00000287292  
ENSG00000254599  
HSALNG0133406  
PRR5-ARHGAP8  
LINC01684  
FAIM  
ATP6AP1L  
LYPLAL1  
piR-37045  
HSALNG0135823  
RAMP3  
REPIN1  
H2BC11  
TPI1P1

TEX36-AS1  
ENSG00000255046  
ENSG00000222042  
OTX2P1  
lnc-JCAD-2  
ENSG00000237936  
THNSL2  
HCAR2  
STARP1  
ENSG00000234389  
ENSG00000249631  
HSALNG0088100  
HSALNG0088101  
HSALNG0088102  
FNDC3B  
LINC00355  
LOC105373170  
KRT8P18  
CTDNEP1  
SLC9A9-AS1  
LOC100130331  
ENSG00000257322  
ENSG00000236501  
RNU6-908P  
ENSG00000250541  
ENSG00000265994  
ENSG00000207171  
EEF1A1P20  
RNU1-35P  
ENSG00000235464  
ENSG00000236389  
RNU6-161P  
MTND1P25  
ENSG00000284676  
ENSG00000287032  
ENSG00000276627  
HSALNG0076986  
lnc-CRYAA-1  
piR-55809-001  
lnc-DDX60L-3  
LOC102723733  
ENSG00000270927  
ENSG00000226973  
LOC107986198  
lnc-EDRF1-4  
HSALNG0038430  
HSALNG0029504  
HSALNG0076987-001  
HSALNG0076987-002  
lnc-AIFM2-3  
HSALNG0093093  
piR-38051-198  
piR-41195-080  
piR-59297-626  
AB372775  
HSALNG0029512  
HSALNG0093097  
piR-31109-001

piR-57133-376  
HSALNG0131408  
ENSG00000254939  
HSALNG0068856  
POT1-AS1  
PBX2P1  
MAS1  
LINC02629  
RNU6-976P  
lnc-TRIB1-7  
ENSG00000268473  
HSALNG0055801  
ZNF300  
ST13P12  
MIR190B  
CLGN  
LINC02789  
IGHG4  
ARPC4  
ENSG00000286231  
PSAPL1  
ENSG00000248537  
ENSG00000250001  
HNRNPA1P58  
LOC101060035  
HSALNG0040068  
lnc-PPP1CC-3  
LINC00888  
LINC01090  
ENSG00000274121  
MIR378C  
SLC23A4P  
H2BC18  
MIR4772  
RAB24  
HMCES  
CPB2-AS1  
LINC01029  
HDHD5-AS1  
LINC02534  
LINC02392  
SNORA63E  
LINC01818  
SNORA63D  
ENSG00000243273  
ENSG00000251152  
ENSG00000249664  
ENSG00000251186  
ENSG00000260234  
LINC02822  
ENSG00000252040  
ENSG00000253092  
ENSG00000253354  
ENSG00000272479  
ENSG00000234481  
ENSG00000241679  
RPL35AP33  
RNU6-655P

LGMNP1  
ENSG00000248112  
HNRNPA3P5  
ENSG00000272823  
ENSG00000259080  
ENSG00000254171  
ENSG00000251730  
ENSG00000197462  
ENSG00000234034  
ENSG00000235503  
LOC107987158  
MRPL45P1  
RPL23AP20  
RNU6-1172P  
lnc-PNPLA5-3  
ENSG00000271682  
ENSG00000233983  
lnc-TSNAX-2  
SDR42E1P5  
ENSG00000288092  
lnc-FAM122A-1  
lnc-MRGPRG-1  
lnc-RHOB-11  
lnc-SLC46A3-1  
lnc-WDR91-4  
HSALNG0071703  
lnc-MYL2-4  
MN309223  
ENSG00000275383  
ENSG00000225906  
ENSG00000231984  
lnc-TRIB1-8  
HSALNG0017419  
ENSG00000287720  
lnc-BICD1-6  
HSALNG0023242  
HSALNG0113292  
HSALNG0113293  
NONHSAG013110.2  
lnc-SLC22A18-7  
HSALNG0071704  
hsa-miR-5096-076  
lnc-KLHL24-6  
piR-50443-100  
piR-61101-044  
ENSG00000280306  
ENSG00000285529  
ENSG00000258506  
ENSG00000271078  
HSALNG0011461  
LOC105376433  
LOC107986000  
lnc-RASGRP1-1  
HSALNG0032698  
HSALNG0043115  
HSALNG0043127  
HSALNG0014027  
HSALNG0010758

HSALNG0031159  
HSALNG0032696  
HSALNG0056551  
HSALNG0061543  
NONHSAG018421.2  
piR-43105-110  
piR-48799-012  
RF00017-1289  
piR-55036-040  
lnc-MARC2-2  
piR-31534-137  
piR-39858-368  
piR-43106-189  
LOC107984123  
LOC105377705  
ENSG00000219736  
ENSG00000229119  
ENSG00000220748  
LOC102724253  
RF00026-272  
HSALNG0105127-003  
HSP90AA2P  
DUSP14  
ZC3H12A  
TSKU  
TRIM47  
SLC25A48  
DNAJC11  
SNRNP40  
YIPF6  
RPL17-C18orf32  
LINC00333  
PDIA2  
TXNDC5  
PHLPP2  
LOC109279247  
PRMT3  
FAM166B  
CR1L  
SAP18  
IGKV2D-23  
NMBR  
SUCNR1  
SGIP1  
MIR103B2  
MIR103B1  
DNAJC10  
HERC4  
FAM174A  
MIR3666  
MIR4668  
TM6SF1
