# Supplementary material for: Explore the Mechanism of Astragalus mongholicus Bunge against Nonalcoholic Fatty Liver Disease Based on Network Pharmacology and Experimental Verification
Source: Hindawi journal article supplement (doi:10.1155/2022/4745042), 2022-04-05
Supplement: f1 [file 4745042.f1.zip]

| Gene     | Description                                                                   | Category       | Gifts | GC Id       | Relevance score | GeneCards Link                                                                                                                        |
|----------|-------------------------------------------------------------------------------|----------------|-------|-------------|-----------------|---------------------------------------------------------------------------------------------------------------------------------------|
| PNPLA3   | Patatin Like Phospholipase Domain Containing 3                                | Protein Coding | 41    | GC22P043923 | 102.4237137     | <a href="https://www.genecards.org/cgi-bin/carddisp.pl?gene=PNPLA3">https://www.genecards.org/cgi-bin/carddisp.pl?gene=PNPLA3</a>     |
| IL6      | Interleukin 6                                                                 | Protein Coding | 50    | GC07P022725 | 95.30979919     | <a href="https://www.genecards.org/cgi-bin/carddisp.pl?gene=IL6">https://www.genecards.org/cgi-bin/carddisp.pl?gene=IL6</a>           |
| APOE     | Apolipoprotein E                                                              | Protein Coding | 51    | GC19P044906 | 94.36561584     | <a href="https://www.genecards.org/cgi-bin/carddisp.pl?gene=APOE">https://www.genecards.org/cgi-bin/carddisp.pl?gene=APOE</a>         |
| PRMT7    | Protein Arginine Methyltransferase 7                                          | Protein Coding | 45    | GC16P068363 | 93.61840057     | <a href="https://www.genecards.org/cgi-bin/carddisp.pl?gene=PRMT7">https://www.genecards.org/cgi-bin/carddisp.pl?gene=PRMT7</a>       |
| MIR122   | MicroRNA 122                                                                  | RNA Gene       | 21    | GC18P058451 | 93.14680481     | <a href="https://www.genecards.org/cgi-bin/carddisp.pl?gene=MIR122">https://www.genecards.org/cgi-bin/carddisp.pl?gene=MIR122</a>     |
| TNF      | Tumor Necrosis Factor                                                         | Protein Coding | 51    | GC06P055202 | 92.23382568     | <a href="https://www.genecards.org/cgi-bin/carddisp.pl?gene=TNF">https://www.genecards.org/cgi-bin/carddisp.pl?gene=TNF</a>           |
| TP53     | Tumor Protein P53                                                             | Protein Coding | 54    | GC17M007661 | 90.97099304     | <a href="https://www.genecards.org/cgi-bin/carddisp.pl?gene=TP53">https://www.genecards.org/cgi-bin/carddisp.pl?gene=TP53</a>         |
| PKD2     | Polycystin 2, Transient Receptor Potential Cation Channel                     | Protein Coding | 47    | GC04P088007 | 89.09770966     | <a href="https://www.genecards.org/cgi-bin/carddisp.pl?gene=PKD2">https://www.genecards.org/cgi-bin/carddisp.pl?gene=PKD2</a>         |
| INS      | Insulin                                                                       | Protein Coding | 48    | GC11M002159 | 85.24944305     | <a href="https://www.genecards.org/cgi-bin/carddisp.pl?gene=INS">https://www.genecards.org/cgi-bin/carddisp.pl?gene=INS</a>           |
| HFE      | Homeostatic Iron Regulator                                                    | Protein Coding | 44    | GC06P026087 | 80.59532928     | <a href="https://www.genecards.org/cgi-bin/carddisp.pl?gene=HFE">https://www.genecards.org/cgi-bin/carddisp.pl?gene=HFE</a>           |
| ALB      | Albumin                                                                       | Protein Coding | 50    | GC04P073397 | 79.82528687     | <a href="https://www.genecards.org/cgi-bin/carddisp.pl?gene=ALB">https://www.genecards.org/cgi-bin/carddisp.pl?gene=ALB</a>           |
| IL10     | Interleukin 10                                                                | Protein Coding | 48    | GC01M206767 | 77.66014862     | <a href="https://www.genecards.org/cgi-bin/carddisp.pl?gene=IL10">https://www.genecards.org/cgi-bin/carddisp.pl?gene=IL10</a>         |
| PPARG    | Peroxisome Proliferator Activated Receptor Gamma                              | Protein Coding | 53    | GC03P012287 | 77.08204651     | <a href="https://www.genecards.org/cgi-bin/carddisp.pl?gene=PPARG">https://www.genecards.org/cgi-bin/carddisp.pl?gene=PPARG</a>       |
| HADHA    | Hydroxyacyl-CoA Dehydrogenase Trifunctional Multienzyme Complex Subunit Alpha | Protein Coding | 47    | GC02M026190 | 76.25171661     | <a href="https://www.genecards.org/cgi-bin/carddisp.pl?gene=HADHA">https://www.genecards.org/cgi-bin/carddisp.pl?gene=HADHA</a>       |
| TGFB1    | Transforming Growth Factor Beta 1                                             | Protein Coding | 52    | GC19M041301 | 72.79130554     | <a href="https://www.genecards.org/cgi-bin/carddisp.pl?gene=TGFB1">https://www.genecards.org/cgi-bin/carddisp.pl?gene=TGFB1</a>       |
| LMNA     | Lamin A/C                                                                     | Protein Coding | 48    | GC01P156082 | 71.62808228     | <a href="https://www.genecards.org/cgi-bin/carddisp.pl?gene=LMNA">https://www.genecards.org/cgi-bin/carddisp.pl?gene=LMNA</a>         |
| MARS1    | Methionyl-TRNA Synthetase 1                                                   | Protein Coding | 36    | GC12P057476 | 71.13464355     | <a href="https://www.genecards.org/cgi-bin/carddisp.pl?gene=MARS1">https://www.genecards.org/cgi-bin/carddisp.pl?gene=MARS1</a>       |
| FABP1    | Fatty Acid Binding Protein 1                                                  | Protein Coding | 44    | GC02M088122 | 67.62335968     | <a href="https://www.genecards.org/cgi-bin/carddisp.pl?gene=FABP1">https://www.genecards.org/cgi-bin/carddisp.pl?gene=FABP1</a>       |
| SMPD1    | Sphingomyelin Phosphodiesterase 1                                             | Protein Coding | 48    | GC11P006390 | 66.9227829      | <a href="https://www.genecards.org/cgi-bin/carddisp.pl?gene=SMPD1">https://www.genecards.org/cgi-bin/carddisp.pl?gene=SMPD1</a>       |
| SLC17A5  | Solute Carrier Family 17 Member 5                                             | Protein Coding | 45    | GC06M073593 | 66.39536285     | <a href="https://www.genecards.org/cgi-bin/carddisp.pl?gene=SLC17A5">https://www.genecards.org/cgi-bin/carddisp.pl?gene=SLC17A5</a>   |
| SERPINA1 | Serpin Family A Member 1                                                      | Protein Coding | 50    | GC14M094376 | 66.35801697     | <a href="https://www.genecards.org/cgi-bin/carddisp.pl?gene=SERPINA1">https://www.genecards.org/cgi-bin/carddisp.pl?gene=SERPINA1</a> |
| FASN     | Fatty Acid Synthase                                                           | Protein Coding | 50    | GC17M082078 | 66.21472168     | <a href="https://www.genecards.org/cgi-bin/carddisp.pl?gene=FASN">https://www.genecards.org/cgi-bin/carddisp.pl?gene=FASN</a>         |
| MIR21    | MicroRNA 21                                                                   | RNA Gene       | 24    | GC17P059841 | 66.13240051     | <a href="https://www.genecards.org/cgi-bin/carddisp.pl?gene=MIR21">https://www.genecards.org/cgi-bin/carddisp.pl?gene=MIR21</a>       |
| ATP7B    | ATPase Copper Transporting Beta                                               | Protein Coding | 48    | GC13M051930 | 65.01322937     | <a href="https://www.genecards.org/cgi-bin/carddisp.pl?gene=ATP7B">https://www.genecards.org/cgi-bin/carddisp.pl?gene=ATP7B</a>       |
| GPT      | Glutamic--Pyruvic Transaminase                                                | Protein Coding | 43    | GC08P144502 | 64.76797485     | <a href="https://www.genecards.org/cgi-bin/carddisp.pl?gene=GPT">https://www.genecards.org/cgi-bin/carddisp.pl?gene=GPT</a>           |
| FAS      | Fas Cell Surface Death Receptor                                               | Protein Coding | 51    | GC10P088969 | 64.5565033      | <a href="https://www.genecards.org/cgi-bin/carddisp.pl?gene=FAS">https://www.genecards.org/cgi-bin/carddisp.pl?gene=FAS</a>           |
| ABCB11   | ATP Binding Cassette Subfamily B Member 11                                    | Protein Coding | 47    | GC02M168922 | 63.66309357     | <a href="https://www.genecards.org/cgi-bin/carddisp.pl?gene=ABCB11">https://www.genecards.org/cgi-bin/carddisp.pl?gene=ABCB11</a>     |
| GANAB    | Glucosidase II Alpha Subunit                                                  | Protein Coding | 45    | GC11M069251 | 63.61607361     | <a href="https://www.genecards.org/cgi-bin/carddisp.pl?gene=GANAB">https://www.genecards.org/cgi-bin/carddisp.pl?gene=GANAB</a>       |
| APOA1    | Apolipoprotein A1                                                             | Protein Coding | 49    | GC11M116835 | 62.34758759     | <a href="https://www.genecards.org/cgi-bin/carddisp.pl?gene=APOA1">https://www.genecards.org/cgi-bin/carddisp.pl?gene=APOA1</a>       |
| CTNNB1   | Catenin Beta 1                                                                | Protein Coding | 54    | GC03P041236 | 62.09061432     | <a href="https://www.genecards.org/cgi-bin/carddisp.pl?gene=CTNNB1">https://www.genecards.org/cgi-bin/carddisp.pl?gene=CTNNB1</a>     |
| PPARA    | Peroxisome Proliferator Activated Receptor Alpha                              | Protein Coding | 47    | GC22P046150 | 61.89193344     | <a href="https://www.genecards.org/cgi-bin/carddisp.pl?gene=PPARA">https://www.genecards.org/cgi-bin/carddisp.pl?gene=PPARA</a>       |
| IL1B     | Interleukin 1 Beta                                                            | Protein Coding | 49    | GC02M112829 | 61.4563179      | <a href="https://www.genecards.org/cgi-bin/carddisp.pl?gene=IL1B">https://www.genecards.org/cgi-bin/carddisp.pl?gene=IL1B</a>         |
| MIR34A   | MicroRNA 34a                                                                  | RNA Gene       | 22    | GC01M009151 | 61.06716156     | <a href="https://www.genecards.org/cgi-bin/carddisp.pl?gene=MIR34A">https://www.genecards.org/cgi-bin/carddisp.pl?gene=MIR34A</a>     |
| APOB     | Apolipoprotein B                                                              | Protein Coding | 46    | GC02M020956 | 61.02857334     | <a href="https://www.genecards.org/cgi-bin/carddisp.pl?gene=APOB">https://www.genecards.org/cgi-bin/carddisp.pl?gene=APOB</a>         |
| NAFLD1   | Fatty Liver Disease 1, Susceptibility To                                      | Genetic Locus  | 1     | GC22U901005 | 61.00867462     | <a href="https://www.genecards.org/cgi-bin/carddisp.pl?gene=NAFLD1">https://www.genecards.org/cgi-bin/carddisp.pl?gene=NAFLD1</a>     |
| ADIPOQ   | Adiponectin, C1Q And Collagen Domain Containing                               | Protein Coding | 45    | GC03P186842 | 60.28987122     | <a href="https://www.genecards.org/cgi-bin/carddisp.pl?gene=ADIPOQ">https://www.genecards.org/cgi-bin/carddisp.pl?gene=ADIPOQ</a>     |
| NOD2     | Nucleotide Binding Oligomerization Domain Containing 2                        | Protein Coding | 48    | GC16P050693 | 60.10681534     | <a href="https://www.genecards.org/cgi-bin/carddisp.pl?gene=NOD2">https://www.genecards.org/cgi-bin/carddisp.pl?gene=NOD2</a>         |
| MIR10B   | MicroRNA 10b                                                                  | RNA Gene       | 21    | GC02P176150 | 59.71246338     | <a href="https://www.genecards.org/cgi-bin/carddisp.pl?gene=MIR10B">https://www.genecards.org/cgi-bin/carddisp.pl?gene=MIR10B</a>     |
| LIPA     | Lipase A, Lysosomal Acid Type                                                 | Protein Coding | 48    | GC10M089213 | 59.69533539     | <a href="https://www.genecards.org/cgi-bin/carddisp.pl?gene=LIPA">https://www.genecards.org/cgi-bin/carddisp.pl?gene=LIPA</a>         |
| PIK3CA   | Phosphatidylinositol-4,5-Bisphosphate 3-Kinase Catalytic Subunit Alpha        | Protein Coding | 53    | GC03P179148 | 59.36377335     | <a href="https://www.genecards.org/cgi-bin/carddisp.pl?gene=PIK3CA">https://www.genecards.org/cgi-bin/carddisp.pl?gene=PIK3CA</a>     |
| CPT2     | Carnitine Palmitoyltransferase 2                                              | Protein Coding | 50    | GC01P053196 | 59.22840118     | <a href="https://www.genecards.org/cgi-bin/carddisp.pl?gene=CPT2">https://www.genecards.org/cgi-bin/carddisp.pl?gene=CPT2</a>         |
| TLR4     | Toll Like Receptor 4                                                          | Protein Coding | 51    | GC09P117704 | 59.15758514     | <a href="https://www.genecards.org/cgi-bin/carddisp.pl?gene=TLR4">https://www.genecards.org/cgi-bin/carddisp.pl?gene=TLR4</a>         |
| SQSTM1   | Sequestosome 1                                                                | Protein Coding | 49    | GC05P179806 | 58.94549561     | <a href="https://www.genecards.org/cgi-bin/carddisp.pl?gene=SQSTM1">https://www.genecards.org/cgi-bin/carddisp.pl?gene=SQSTM1</a>     |
| CRP      | C-Reactive Protein                                                            | Protein Coding | 47    | GC01M159719 | 58.70598602     | <a href="https://www.genecards.org/cgi-bin/carddisp.pl?gene=CRP">https://www.genecards.org/cgi-bin/carddisp.pl?gene=CRP</a>           |
| NR1H4    | Nuclear Receptor Subfamily 1 Group H Member 4                                 | Protein Coding | 49    | GC12P100473 | 58.61371613     | <a href="https://www.genecards.org/cgi-bin/carddisp.pl?gene=NR1H4">https://www.genecards.org/cgi-bin/carddisp.pl?gene=NR1H4</a>       |
| MFN2     | Mitofusin 2                                                                   | Protein Coding | 48    | GC01P011980 | 58.31835938     | <a href="https://www.genecards.org/cgi-bin/carddisp.pl?gene=MFN2">https://www.genecards.org/cgi-bin/carddisp.pl?gene=MFN2</a>         |
| CPT1A    | Carnitine Palmitoyltransferase 1A                                             | Protein Coding | 50    | GC11M068754 | 58.00518799     | <a href="https://www.genecards.org/cgi-bin/carddisp.pl?gene=CPT1A">https://www.genecards.org/cgi-bin/carddisp.pl?gene=CPT1A</a>       |
| ABCA1    | ATP Binding Cassette Subfamily A Member 1                                     | Protein Coding | 48    | GC09M104781 | 57.74860001     | <a href="https://www.genecards.org/cgi-bin/carddisp.pl?gene=ABCA1">https://www.genecards.org/cgi-bin/carddisp.pl?gene=ABCA1</a>       |
| APP      | Amyloid Beta Precursor Protein                                                | Protein Coding | 52    | GC21M025880 | 57.08755493     | <a href="https://www.genecards.org/cgi-bin/carddisp.pl?gene=APP">https://www.genecards.org/cgi-bin/carddisp.pl?gene=APP</a>           |
| MIR17    | MicroRNA 17                                                                   | RNA Gene       | 21    | GC13P091350 | 56.92521436     | <a href="https://www.genecards.org/cgi-bin/carddisp.pl?gene=MIR17">https://www.genecards.org/cgi-bin/carddisp.pl?gene=MIR17</a>       |
| G6PC1    | Glucose-6-Phosphatase Catalytic Subunit 1                                     | Protein Coding | 36    | GC17P044746 | 56.77759171     | <a href="https://www.genecards.org/cgi-bin/carddisp.pl?gene=G6PC1">https://www.genecards.org/cgi-bin/carddisp.pl?gene=G6PC1</a>       |
| KRT18    | Keratin 18                                                                    | Protein Coding | 49    | GC12P052948 | 56.36305237     | <a href="https://www.genecards.org/cgi-bin/carddisp.pl?gene=KRT18">https://www.genecards.org/cgi-bin/carddisp.pl?gene=KRT18</a>       |
| MIR155   | MicroRNA 155                                                                  | RNA Gene       | 19    | GC21P025560 | 55.06369781     | <a href="https://www.genecards.org/cgi-bin/carddisp.pl?gene=MIR155">https://www.genecards.org/cgi-bin/carddisp.pl?gene=MIR155</a>     |
| CXCL8    | C-X-C Motif Chemokine Ligand 8                                                | Protein Coding | 42    | GC04P073740 | 54.85639954     | <a href="https://www.genecards.org/cgi-bin/carddisp.pl?gene=CXCL8">https://www.genecards.org/cgi-bin/carddisp.pl?gene=CXCL8</a>       |
| AKT1     | AKT Serine/Threonine Kinase 1                                                 | Protein Coding | 54    | GC14M104769 | 54.75885391     | <a href="https://www.genecards.org/cgi-bin/carddisp.pl?gene=AKT1">https://www.genecards.org/cgi-bin/carddisp.pl?gene=AKT1</a>         |
| LPL      | Lipoprotein Lipase                                                            | Protein Coding | 50    | GC08P019901 | 54.21808624     | <a href="https://www.genecards.org/cgi-bin/carddisp.pl?gene=LPL">https://www.genecards.org/cgi-bin/carddisp.pl?gene=LPL</a>           |
| PTEN     | Phosphatase And Tensin Homolog                                                | Protein Coding | 53    | GC10P087863 | 53.96323013     | <a href="https://www.genecards.org/cgi-bin/carddisp.pl?gene=PTEN">https://www.genecards.org/cgi-bin/carddisp.pl?gene=PTEN</a>         |
| CD36     | CD36 Molecule                                                                 | Protein Coding | 49    | GC07P080369 | 53.85723114     | <a href="https://www.genecards.org/cgi-bin/carddisp.pl?gene=CD36">https://www.genecards.org/cgi-bin/carddisp.pl?gene=CD36</a>         |
| CTLA4    | Cytotoxic T-Lymphocyte Associated Protein 4                                   | Protein Coding | 46    | GC02P203867 | 53.4139328      | <a href="https://www.genecards.org/cgi-bin/carddisp.pl?gene=CTLA4">https://www.genecards.org/cgi-bin/carddisp.pl?gene=CTLA4</a>       |
| GGT1     | Gamma-Glutamyltransferase 1                                                   | Protein Coding | 48    | GC22P024583 | 52.50072098     | <a href="https://www.genecards.org/cgi-bin/carddisp.pl?gene=GGT1">https://www.genecards.org/cgi-bin/carddisp.pl?gene=GGT1</a>         |
| HNF4A    | Hepatocyte Nuclear Factor 4 Alpha                                             | Protein Coding | 51    | GC20P044355 | 52.43869781     | <a href="https://www.genecards.org/cgi-bin/carddisp.pl?gene=HNF4A">https://www.genecards.org/cgi-bin/carddisp.pl?gene=HNF4A</a>       |
| CYP2E1   | Cytochrome P450 Family 2 Subfamily E Member 1                                 | Protein Coding | 46    | GC10P133520 | 52.40969467     | <a href="https://www.genecards.org/cgi-bin/carddisp.pl?gene=CYP2E1">https://www.genecards.org/cgi-bin/carddisp.pl?gene=CYP2E1</a>     |
| LEP      | Leptin                                                                        | Protein Coding | 48    | GC07P128241 | 52.03404236     | <a href="https://www.genecards.org/cgi-bin/carddisp.pl?gene=LEP">https://www.genecards.org/cgi-bin/carddisp.pl?gene=LEP</a>           |
| VWF      | Von Willebrand Factor                                                         | Protein Coding | 49    | GC12M005917 | 51.99846649     | <a href="https://www.genecards.org/cgi-bin/carddisp.pl?gene=VWF">https://www.genecards.org/cgi-bin/carddisp.pl?gene=VWF</a>           |
| VCP      | Valosin Containing Protein                                                    | Protein Coding | 50    | GC09M035056 | 51.8118248      | <a href="https://www.genecards.org/cgi-bin/carddisp.pl?gene=VCP">https://www.genecards.org/cgi-bin/carddisp.pl?gene=VCP</a>           |
| FABP4    | Fatty Acid Binding Protein 4                                                  | Protein Coding | 45    | GC08M081478 | 51.40408707     | <a href="https://www.genecards.org/cgi-bin/carddisp.pl?gene=FABP4">https://www.genecards.org/cgi-bin/carddisp.pl?gene=FABP4</a>       |
| SREBF1   | Sterol Regulatory Element Binding Transcription Factor 1                      | Protein Coding | 46    | GC17M017810 | 51.28795624     | <a href="https://www.genecards.org/cgi-bin/carddisp.pl?gene=SREBF1">https://www.genecards.org/cgi-bin/carddisp.pl?gene=SREBF1</a>     |
| F2       | Coagulation Factor II, Thrombin                                               | Protein Coding | 49    | GC11P046720 | 51.17159271     | <a href="https://www.genecards.org/cgi-bin/carddisp.pl?gene=F2">https://www.genecards.org/cgi-bin/carddisp.pl?gene=F2</a>             |
| MTTP     | Microsomal Triglyceride Transfer Protein                                      | Protein Coding | 45    | GC04P099563 | 50.73419189     | <a href="https://www.genecards.org/cgi-bin/carddisp.pl?gene=MTTP">https://www.genecards.org/cgi-bin/carddisp.pl?gene=MTTP</a>         |
| INSR     | Insulin Receptor                                                              | Protein Coding | 54    | GC19M007112 | 49.7062912      | <a href="https://www.genecards.org/cgi-bin/carddisp.pl?gene=INSR">https://www.genecards.org/cgi-bin/carddisp.pl?gene=INSR</a>         |
| IFNG     | Interferon Gamma                                                              | Protein Coding | 48    | GC12M068154 | 49.25480652     | <a href="https://www.genecards.org/cgi-bin/carddisp.pl?gene=IFNG">https://www.genecards.org/cgi-bin/carddisp.pl?gene=IFNG</a>         |
| NR1H3    | Nuclear Receptor Subfamily 1 Group H Member 3                                 | Protein Coding | 48    | GC11P047248 | 49.17764664     | <a href="https://www.genecards.org/cgi-bin/carddisp.pl?gene=NR1H3">https://www.genecards.org/cgi-bin/carddisp.pl?gene=NR1H3</a>       |
| CFTR     | CF Transmembrane Conductance                                                  | Protein Coding | 52    | GC07P117287 | 49.02300262     | <a href="https://www.genecards.org/cgi-bin/carddisp.pl?gene=CFTR">https://www.genecards.org/cgi-bin/carddisp.pl?gene=CFTR</a>         |
| ACE      | Angiotensin I Converting Enzyme                                               | Protein Coding | 50    | GC17P063477 | 48.6252594      | <a href="https://www.genecards.org/cgi-bin/carddisp.pl?gene=ACE">https://www.genecards.org/cgi-bin/carddisp.pl?gene=ACE</a>           |
| TERT     | Telomerase Reverse Transcriptase                                              | Protein Coding | 52    | GC05M001253 | 48.496418       | <a href="https://www.genecards.org/cgi-bin/carddisp.pl?gene=TERT">https://www.genecards.org/cgi-bin/carddisp.pl?gene=TERT</a>         |
| FABP2    | Fatty Acid Binding Protein 2                                                  | Protein Coding | 43    | GC04M119317 | 48.23287582     | <a href="https://www.genecards.org/cgi-bin/carddisp.pl?gene=FABP2">https://www.genecards.org/cgi-bin/carddisp.pl?gene=FABP2</a>       |
| MIR146A  | MicroRNA 146a                                                                 | RNA Gene       | 22    | GC05P160485 | 47.88103485     | <a href="https://www.genecards.org/cgi-bin/carddisp.pl?gene=MIR146A">https://www.genecards.org/cgi-bin/carddisp.pl?gene=MIR146A</a>   |
| ACOX1    | Acyl-CoA Oxidase 1                                                            | Protein Coding | 47    | GC17M075941 | 47.87750244     | <a href="https://www.genecards.org/cgi-bin/carddisp.pl?gene=ACOX1">https://www.genecards.org/cgi-bin/carddisp.pl?gene=ACOX1</a>       |
| ABCB4    | ATP Binding Cassette Subfamily B Member 4                                     | Protein Coding | 47    | GC07M087401 | 47.29715347     | <a href="https://www.genecards.org/cgi-bin/carddisp.pl?gene=ABCB4">https://www.genecards.org/cgi-bin/carddisp.pl?gene=ABCB4</a>       |
| SERPINE1 | Serpin Family E Member 1                                                      | Protein Coding | 51    | GC07P101127 | 46.52587891     | <a href="https://www.genecards.org/cgi-bin/carddisp.pl?gene=SERPINE1">https://www.genecards.org/cgi-bin/carddisp.pl?gene=SERPINE1</a> |
| EGFR     | Epidermal Growth Factor Receptor                                              | Protein Coding | 54    | GC07P055019 | 46.42074203     | <a href="https://www.genecards.org/cgi-bin/carddisp.pl?gene=EGFR">https://www.genecards.org/cgi-bin/carddisp.pl?gene=EGFR</a>         |
| CASP8    | Caspase 8                                                                     | Protein Coding | 52    | GC02P201233 | 46.29785156     | <a href="https://www.genecards.org/cgi-bin/carddisp.pl?gene=CASP8">https://www.genecards.org/cgi-bin/carddisp.pl?gene=CASP8</a>       |
| IGF1     | Insulin Like Growth Factor 1                                                  | Protein Coding | 50    | GC12M102395 | 46.25844574     | <a href="https://www.genecards.org/cgi-bin/carddisp.pl?gene=IGF1">https://www.genecards.org/cgi-bin/carddisp.pl?gene=IGF1</a>         |
| CYBB     | Cytochrome B-245 Beta Chain                                                   | Protein Coding | 47    | GC0XP037780 | 46.05702591     | <a href="https://www.genecards.org/cgi-bin/carddisp.pl?gene=CYBB">https://www.genecards.org/cgi-bin/carddisp.pl?gene=CYBB</a>         |
| STAT3    | Signal Transducer And Activator Of Transcription 3                            | Protein Coding | 53    | GC17M042313 | 45.96729279     | <a href="https://www.genecards.org/cgi-bin/carddisp.pl?gene=STAT3">https://www.genecards.org/cgi-bin/carddisp.pl?gene=STAT3</a>       |
| RBP4     | Retinol Binding Protein 4                                                     | Protein Coding | 45    | GC10M093591 | 45.69139862     | <a href="https://www.genecards.org/cgi-bin/carddisp.pl?gene=RBP4">https://www.genecards.org/cgi-bin/carddisp.pl?gene=RBP4</a>         |
| HMOX1    | Heme Oxygenase 1                                                              | Protein Coding | 53    | GC22P035380 | 45.51039124     | <a href="https://www.genecards.org/cgi-bin/carddisp.pl?gene=HMOX1">https://www.genecards.org/cgi-bin/carddisp.pl?gene=HMOX1</a>       |
| HLA-DQB1 | Major Histocompatibility Complex, Class II, DO Beta 1                         | Protein Coding | 43    | GC06M046939 | 45.46877289     | <a href="https://www.genecards.org/cgi-bin/carddisp.pl?gene=HLA-DQB1">https://www.genecards.org/cgi-bin/carddisp.pl?gene=HLA-DQB1</a> |

|          |                                                                        |                |    |              |             |                                                                                                                                       |
|----------|------------------------------------------------------------------------|----------------|----|--------------|-------------|---------------------------------------------------------------------------------------------------------------------------------------|
| HBB      | Hemoglobin Subunit Beta                                                | Protein Coding | 46 | GC11M005434  | 44.67763901 | <a href="https://www.genecards.org/cgi-bin/carddisp.pl?gene=HBB">https://www.genecards.org/cgi-bin/carddisp.pl?gene=HBB</a>           |
| TTR      | Transthyretin                                                          | Protein Coding | 50 | GC18P031557  | 44.22271729 | <a href="https://www.genecards.org/cgi-bin/carddisp.pl?gene=TTR">https://www.genecards.org/cgi-bin/carddisp.pl?gene=TTR</a>           |
| IRS1     | Insulin Receptor Substrate 1                                           | Protein Coding | 48 | GC02M226731  | 43.72430801 | <a href="https://www.genecards.org/cgi-bin/carddisp.pl?gene=IRS1">https://www.genecards.org/cgi-bin/carddisp.pl?gene=IRS1</a>         |
| EGF      | Epidermal Growth Factor                                                | Protein Coding | 51 | GC04P109912  | 43.58280182 | <a href="https://www.genecards.org/cgi-bin/carddisp.pl?gene=EGF">https://www.genecards.org/cgi-bin/carddisp.pl?gene=EGF</a>           |
| SLC25A13 | Solute Carrier Family 25 Member 13                                     | Protein Coding | 47 | GC07M096120  | 43.5845413  | <a href="https://www.genecards.org/cgi-bin/carddisp.pl?gene=SLC25A13">https://www.genecards.org/cgi-bin/carddisp.pl?gene=SLC25A13</a> |
| IL1A     | Interleukin 1 Alpha                                                    | Protein Coding | 44 | GC02M112773  | 43.59876175 | <a href="https://www.genecards.org/cgi-bin/carddisp.pl?gene=IL1A">https://www.genecards.org/cgi-bin/carddisp.pl?gene=IL1A</a>         |
| AFP      | Alpha Fetoprotein                                                      | Protein Coding | 46 | GC04P073431  | 43.34745026 | <a href="https://www.genecards.org/cgi-bin/carddisp.pl?gene=AFP">https://www.genecards.org/cgi-bin/carddisp.pl?gene=AFP</a>           |
| TLR2     | Toll Like Receptor 2                                                   | Protein Coding | 52 | GC04P153684  | 43.21223068 | <a href="https://www.genecards.org/cgi-bin/carddisp.pl?gene=TLR2">https://www.genecards.org/cgi-bin/carddisp.pl?gene=TLR2</a>         |
| KRT8     | Keratin 8                                                              | Protein Coding | 48 | GC12M052897  | 43.20010376 | <a href="https://www.genecards.org/cgi-bin/carddisp.pl?gene=KRT8">https://www.genecards.org/cgi-bin/carddisp.pl?gene=KRT8</a>         |
| ABHD5    | Abhydrolase Domain Containing 5, Lysophosphatidic Acid Acyltransferase | Protein Coding | 45 | GC03P043707  | 42.95199966 | <a href="https://www.genecards.org/cgi-bin/carddisp.pl?gene=ABHD5">https://www.genecards.org/cgi-bin/carddisp.pl?gene=ABHD5</a>       |
| MIR27A   | MicroRNA 27a                                                           | RNA Gene       | 22 | GC19M0114109 | 42.90045929 | <a href="https://www.genecards.org/cgi-bin/carddisp.pl?gene=MIR27A">https://www.genecards.org/cgi-bin/carddisp.pl?gene=MIR27A</a>     |
| LEPR     | Leptin Receptor                                                        | Protein Coding | 50 | GC01P065421  | 42.75074005 | <a href="https://www.genecards.org/cgi-bin/carddisp.pl?gene=LEPR">https://www.genecards.org/cgi-bin/carddisp.pl?gene=LEPR</a>         |
| CASP3    | Caspase 3                                                              | Protein Coding | 51 | GC04M184627  | 42.58610153 | <a href="https://www.genecards.org/cgi-bin/carddisp.pl?gene=CASP3">https://www.genecards.org/cgi-bin/carddisp.pl?gene=CASP3</a>       |
| CCL2     | C-C Motif Chemokine Ligand 2                                           | Protein Coding | 49 | GC17P034255  | 42.4992485  | <a href="https://www.genecards.org/cgi-bin/carddisp.pl?gene=CCL2">https://www.genecards.org/cgi-bin/carddisp.pl?gene=CCL2</a>         |
| SOD1     | Superoxide Dismutase 1                                                 | Protein Coding | 52 | GC21P031659  | 42.46434402 | <a href="https://www.genecards.org/cgi-bin/carddisp.pl?gene=SOD1">https://www.genecards.org/cgi-bin/carddisp.pl?gene=SOD1</a>         |
| MTHFR    | Methylenetetrahydrofolate Reductase                                    | Protein Coding | 49 | GC01M011785  | 42.33821869 | <a href="https://www.genecards.org/cgi-bin/carddisp.pl?gene=MTHFR">https://www.genecards.org/cgi-bin/carddisp.pl?gene=MTHFR</a>       |
| BSC12    | BSC12 Lipid Droplet Biogenesis Associated, Seipin                      | Protein Coding | 43 | GC11M069260  | 42.32678604 | <a href="https://www.genecards.org/cgi-bin/carddisp.pl?gene=BSC12">https://www.genecards.org/cgi-bin/carddisp.pl?gene=BSC12</a>       |
| PPARGC1A | PPARG Coactivator 1 Alpha                                              | Protein Coding | 47 | GC04M023755  | 42.03114319 | <a href="https://www.genecards.org/cgi-bin/carddisp.pl?gene=PPARGC1A">https://www.genecards.org/cgi-bin/carddisp.pl?gene=PPARGC1A</a> |
| MIR29A   | MicroRNA 29a                                                           | RNA Gene       | 22 | GC07M130876  | 41.87608719 | <a href="https://www.genecards.org/cgi-bin/carddisp.pl?gene=MIR29A">https://www.genecards.org/cgi-bin/carddisp.pl?gene=MIR29A</a>     |
| VEGFA    | Vascular Endothelial Growth Factor A                                   | Protein Coding | 49 | GC06P043770  | 41.61352921 | <a href="https://www.genecards.org/cgi-bin/carddisp.pl?gene=VEGFA">https://www.genecards.org/cgi-bin/carddisp.pl?gene=VEGFA</a>       |
| MIR200B  | MicroRNA 200b                                                          | RNA Gene       | 20 | GC01P001167  | 41.41399384 | <a href="https://www.genecards.org/cgi-bin/carddisp.pl?gene=MIR200B">https://www.genecards.org/cgi-bin/carddisp.pl?gene=MIR200B</a>   |
| MIR203A  | MicroRNA 203a                                                          | RNA Gene       | 19 | GC14P106054  | 41.18896484 | <a href="https://www.genecards.org/cgi-bin/carddisp.pl?gene=MIR203A">https://www.genecards.org/cgi-bin/carddisp.pl?gene=MIR203A</a>   |
| RETN     | Resistin                                                               | Protein Coding | 44 | GC19P007669  | 40.77745056 | <a href="https://www.genecards.org/cgi-bin/carddisp.pl?gene=RETN">https://www.genecards.org/cgi-bin/carddisp.pl?gene=RETN</a>         |
| PON1     | Paraoxonase 1                                                          | Protein Coding | 46 | GC07M095297  | 40.4878006  | <a href="https://www.genecards.org/cgi-bin/carddisp.pl?gene=PON1">https://www.genecards.org/cgi-bin/carddisp.pl?gene=PON1</a>         |
| JAG1     | Jagged Canonical Notch Ligand 1                                        | Protein Coding | 51 | GC20M010637  | 40.26721573 | <a href="https://www.genecards.org/cgi-bin/carddisp.pl?gene=JAG1">https://www.genecards.org/cgi-bin/carddisp.pl?gene=JAG1</a>         |
| MMP9     | Matrix Metalloproteinase 9                                             | Protein Coding | 54 | GC20P046008  | 40.25731659 | <a href="https://www.genecards.org/cgi-bin/carddisp.pl?gene=MMP9">https://www.genecards.org/cgi-bin/carddisp.pl?gene=MMP9</a>         |
| GARS1    | Glycyl-TRNA Synthetase 1                                               | Protein Coding | 37 | GC07P030580  | 40.09081268 | <a href="https://www.genecards.org/cgi-bin/carddisp.pl?gene=GARS1">https://www.genecards.org/cgi-bin/carddisp.pl?gene=GARS1</a>       |
| YARS1    | Tyrosyl-TRNA Synthetase 1                                              | Protein Coding | 37 | GC01M032776  | 40.0786438  | <a href="https://www.genecards.org/cgi-bin/carddisp.pl?gene=YARS1">https://www.genecards.org/cgi-bin/carddisp.pl?gene=YARS1</a>       |
| SMAD4    | SMAD Family Member 4                                                   | Protein Coding | 51 | GC18P051028  | 40.06649017 | <a href="https://www.genecards.org/cgi-bin/carddisp.pl?gene=SMAD4">https://www.genecards.org/cgi-bin/carddisp.pl?gene=SMAD4</a>       |
| CYP3A4   | Cytochrome P450 Family 3 Subfamily A Member 4                          | Protein Coding | 51 | GC07M099759  | 40.04926682 | <a href="https://www.genecards.org/cgi-bin/carddisp.pl?gene=CYP3A4">https://www.genecards.org/cgi-bin/carddisp.pl?gene=CYP3A4</a>     |
| FADS2    | Fatty Acid Desaturase 2                                                | Protein Coding | 45 | GC11P061792  | 39.96272278 | <a href="https://www.genecards.org/cgi-bin/carddisp.pl?gene=FADS2">https://www.genecards.org/cgi-bin/carddisp.pl?gene=FADS2</a>       |
| LDLR     | Low Density Lipoprotein Receptor                                       | Protein Coding | 50 | GC19P011091  | 39.88188553 | <a href="https://www.genecards.org/cgi-bin/carddisp.pl?gene=LDLR">https://www.genecards.org/cgi-bin/carddisp.pl?gene=LDLR</a>         |
| FABP3    | Fatty Acid Binding Protein 3                                           | Protein Coding | 44 | GC01M031365  | 39.87561798 | <a href="https://www.genecards.org/cgi-bin/carddisp.pl?gene=FABP3">https://www.genecards.org/cgi-bin/carddisp.pl?gene=FABP3</a>       |
| HSPB1    | Heat Shock Protein Family B (Small) Member 1                           | Protein Coding | 52 | GC07P076302  | 39.70830917 | <a href="https://www.genecards.org/cgi-bin/carddisp.pl?gene=HSPB1">https://www.genecards.org/cgi-bin/carddisp.pl?gene=HSPB1</a>       |
| UCP2     | Uncoupling Protein 2                                                   | Protein Coding | 46 | GC11M073974  | 39.67284775 | <a href="https://www.genecards.org/cgi-bin/carddisp.pl?gene=UCP2">https://www.genecards.org/cgi-bin/carddisp.pl?gene=UCP2</a>         |
| MMP1     | Matrix Metalloproteinase 1                                             | Protein Coding | 52 | GC11M102810  | 39.0076828  | <a href="https://www.genecards.org/cgi-bin/carddisp.pl?gene=MMP1">https://www.genecards.org/cgi-bin/carddisp.pl?gene=MMP1</a>         |
| MIR22    | MicroRNA 22                                                            | RNA Gene       | 20 | GC17M001713  | 38.98328018 | <a href="https://www.genecards.org/cgi-bin/carddisp.pl?gene=MIR22">https://www.genecards.org/cgi-bin/carddisp.pl?gene=MIR22</a>       |
| NOTCH1   | Notch Receptor 1                                                       | Protein Coding | 51 | GC09M136705  | 38.94213867 | <a href="https://www.genecards.org/cgi-bin/carddisp.pl?gene=NOTCH1">https://www.genecards.org/cgi-bin/carddisp.pl?gene=NOTCH1</a>     |
| IL18     | Interleukin 18                                                         | Protein Coding | 44 | GC11M112143  | 38.8327179  | <a href="https://www.genecards.org/cgi-bin/carddisp.pl?gene=IL18">https://www.genecards.org/cgi-bin/carddisp.pl?gene=IL18</a>         |
| SOD2     | Superoxide Dismutase 2                                                 | Protein Coding | 51 | GC06M159669  | 38.7767334  | <a href="https://www.genecards.org/cgi-bin/carddisp.pl?gene=SOD2">https://www.genecards.org/cgi-bin/carddisp.pl?gene=SOD2</a>         |
| MPO      | Myeloperoxidase                                                        | Protein Coding | 51 | GC17M058269  | 38.43812561 | <a href="https://www.genecards.org/cgi-bin/carddisp.pl?gene=MPO">https://www.genecards.org/cgi-bin/carddisp.pl?gene=MPO</a>           |
| SCD      | Stearoyl-CoA Desaturase                                                | Protein Coding | 49 | GC10P100347  | 38.4039917  | <a href="https://www.genecards.org/cgi-bin/carddisp.pl?gene=SCD">https://www.genecards.org/cgi-bin/carddisp.pl?gene=SCD</a>           |
| CYBA     | Cytochrome B-245 Alpha Chain                                           | Protein Coding | 48 | GC16M088643  | 38.31346512 | <a href="https://www.genecards.org/cgi-bin/carddisp.pl?gene=CYBA">https://www.genecards.org/cgi-bin/carddisp.pl?gene=CYBA</a>         |
| CFH      | Complement Factor H                                                    | Protein Coding | 46 | GC01P196621  | 37.9663887  | <a href="https://www.genecards.org/cgi-bin/carddisp.pl?gene=CFH">https://www.genecards.org/cgi-bin/carddisp.pl?gene=CFH</a>           |
| MLXIPL   | MLX Interacting Protein Like                                           | Protein Coding | 43 | GC07M073593  | 37.83913422 | <a href="https://www.genecards.org/cgi-bin/carddisp.pl?gene=MLXIPL">https://www.genecards.org/cgi-bin/carddisp.pl?gene=MLXIPL</a>     |
| CAV1     | Caveolin 1                                                             | Protein Coding | 48 | GC07P116524  | 37.80889511 | <a href="https://www.genecards.org/cgi-bin/carddisp.pl?gene=CAV1">https://www.genecards.org/cgi-bin/carddisp.pl?gene=CAV1</a>         |
| MAPK8    | Mitogen-Activated Protein Kinase 8                                     | Protein Coding | 51 | GC10P048306  | 37.78774261 | <a href="https://www.genecards.org/cgi-bin/carddisp.pl?gene=MAPK8">https://www.genecards.org/cgi-bin/carddisp.pl?gene=MAPK8</a>       |
| PNPLA2   | Patatin Like Phospholipase Domain                                      | Protein Coding | 45 | GC11P000994  | 37.62009811 | <a href="https://www.genecards.org/cgi-bin/carddisp.pl?gene=PNPLA2">https://www.genecards.org/cgi-bin/carddisp.pl?gene=PNPLA2</a>     |
| TNFRSF1A | TNF Receptor Superfamily Member 1A                                     | Protein Coding | 50 | GC12M006328  | 37.56293488 | <a href="https://www.genecards.org/cgi-bin/carddisp.pl?gene=TNFRSF1A">https://www.genecards.org/cgi-bin/carddisp.pl?gene=TNFRSF1A</a> |
| CP       | Ceruloplasmin                                                          | Protein Coding | 48 | GC03M149162  | 37.3901062  | <a href="https://www.genecards.org/cgi-bin/carddisp.pl?gene=CP">https://www.genecards.org/cgi-bin/carddisp.pl?gene=CP</a>             |
| SERPINA3 | Serpin Family A Member 3                                               | Protein Coding | 44 | GC14P094612  | 37.31189346 | <a href="https://www.genecards.org/cgi-bin/carddisp.pl?gene=SERPINA3">https://www.genecards.org/cgi-bin/carddisp.pl?gene=SERPINA3</a> |
| SPPI     | Secreted Phosphoprotein 1                                              | Protein Coding | 47 | GC04P087975  | 37.20774841 | <a href="https://www.genecards.org/cgi-bin/carddisp.pl?gene=SPPI">https://www.genecards.org/cgi-bin/carddisp.pl?gene=SPPI</a>         |
| MIR20A   | MicroRNA 20a                                                           | RNA Gene       | 19 | GC13P091444  | 37.0332489  | <a href="https://www.genecards.org/cgi-bin/carddisp.pl?gene=MIR20A">https://www.genecards.org/cgi-bin/carddisp.pl?gene=MIR20A</a>     |
| BRCA2    | BRCA2 DNA Repair Associated                                            | Protein Coding | 50 | GC13P032315  | 37.04915619 | <a href="https://www.genecards.org/cgi-bin/carddisp.pl?gene=BRCA2">https://www.genecards.org/cgi-bin/carddisp.pl?gene=BRCA2</a>       |
| UGT1A1   | UDP Glucuronosyltransferase Family 1 Member A1                         | Protein Coding | 49 | GC02P233760  | 36.9387207  | <a href="https://www.genecards.org/cgi-bin/carddisp.pl?gene=UGT1A1">https://www.genecards.org/cgi-bin/carddisp.pl?gene=UGT1A1</a>     |
| MTOR     | Mechanistic Target Of Rapamycin Kinase                                 | Protein Coding | 54 | GC01M011106  | 36.73412704 | <a href="https://www.genecards.org/cgi-bin/carddisp.pl?gene=MTOR">https://www.genecards.org/cgi-bin/carddisp.pl?gene=MTOR</a>         |
| RELA     | RELA Proto-Oncogene, NF-KB Subunit                                     | Protein Coding | 51 | GC11M065653  | 36.6779213  | <a href="https://www.genecards.org/cgi-bin/carddisp.pl?gene=RELA">https://www.genecards.org/cgi-bin/carddisp.pl?gene=RELA</a>         |
| SIRT1    | Sirtuin 1                                                              | Protein Coding | 50 | GC10P067884  | 36.48433685 | <a href="https://www.genecards.org/cgi-bin/carddisp.pl?gene=SIRT1">https://www.genecards.org/cgi-bin/carddisp.pl?gene=SIRT1</a>       |
| APOC3    | Apolipoprotein C3                                                      | Protein Coding | 44 | GC11P116829  | 36.37243652 | <a href="https://www.genecards.org/cgi-bin/carddisp.pl?gene=APOC3">https://www.genecards.org/cgi-bin/carddisp.pl?gene=APOC3</a>       |
| DNAJB11  | DnaJ Heat Shock Protein Family (Hsp40) Member B11                      | Protein Coding | 41 | GC03P186567  | 36.25784302 | <a href="https://www.genecards.org/cgi-bin/carddisp.pl?gene=DNAJB11">https://www.genecards.org/cgi-bin/carddisp.pl?gene=DNAJB11</a>   |
| ACACA    | Acetyl-CoA Carboxylase Alpha                                           | Protein Coding | 50 | GC17M037084  | 36.21570587 | <a href="https://www.genecards.org/cgi-bin/carddisp.pl?gene=ACACA">https://www.genecards.org/cgi-bin/carddisp.pl?gene=ACACA</a>       |
| ELOVL6   | ELOVL Fatty Acid Elongase 6                                            | Protein Coding | 41 | GC04M110045  | 35.96213531 | <a href="https://www.genecards.org/cgi-bin/carddisp.pl?gene=ELOVL6">https://www.genecards.org/cgi-bin/carddisp.pl?gene=ELOVL6</a>     |
| PRKAG2   | Protein Kinase AMP-Activated Non-Catalytic Subunit Gamma 2             | Protein Coding | 51 | GC07M151556  | 35.65856171 | <a href="https://www.genecards.org/cgi-bin/carddisp.pl?gene=PRKAG2">https://www.genecards.org/cgi-bin/carddisp.pl?gene=PRKAG2</a>     |
| ABCC2    | ATP Binding Cassette Subfamily C Member 2                              | Protein Coding | 48 | GC10P099782  | 35.48709869 | <a href="https://www.genecards.org/cgi-bin/carddisp.pl?gene=ABCC2">https://www.genecards.org/cgi-bin/carddisp.pl?gene=ABCC2</a>       |
| LIPC     | Lipase C, Hepatic Type                                                 | Protein Coding | 46 | GC15P058410  | 35.48361969 | <a href="https://www.genecards.org/cgi-bin/carddisp.pl?gene=LIPC">https://www.genecards.org/cgi-bin/carddisp.pl?gene=LIPC</a>         |
| ICAM1    | Intercellular Adhesion Molecule 1                                      | Protein Coding | 51 | GC19P010270  | 35.46846771 | <a href="https://www.genecards.org/cgi-bin/carddisp.pl?gene=ICAM1">https://www.genecards.org/cgi-bin/carddisp.pl?gene=ICAM1</a>       |
| CCND1    | Cyclin D1                                                              | Protein Coding | 52 | GC11P069641  | 35.30378723 | <a href="https://www.genecards.org/cgi-bin/carddisp.pl?gene=CCND1">https://www.genecards.org/cgi-bin/carddisp.pl?gene=CCND1</a>       |
| MIR126   | MicroRNA 126                                                           | RNA Gene       | 22 | GC09P136670  | 35.23448944 | <a href="https://www.genecards.org/cgi-bin/carddisp.pl?gene=MIR126">https://www.genecards.org/cgi-bin/carddisp.pl?gene=MIR126</a>     |
| HAMP     | Hepcidin Antimicrobial Peptide                                         | Protein Coding | 44 | GC19P040344  | 35.09099579 | <a href="https://www.genecards.org/cgi-bin/carddisp.pl?gene=HAMP">https://www.genecards.org/cgi-bin/carddisp.pl?gene=HAMP</a>         |
| HMGCR    | 3-Hydroxy-3-Methylglutaryl-CoA                                         | Protein Coding | 47 | GC05P075336  | 35.07630539 | <a href="https://www.genecards.org/cgi-bin/carddisp.pl?gene=HMGCR">https://www.genecards.org/cgi-bin/carddisp.pl?gene=HMGCR</a>       |
| TF       | Transferrin                                                            | Protein Coding | 50 | GC03P133666  | 34.86120605 | <a href="https://www.genecards.org/cgi-bin/carddisp.pl?gene=TF">https://www.genecards.org/cgi-bin/carddisp.pl?gene=TF</a>             |
| HGF      | Hepatocyte Growth Factor                                               | Protein Coding | 52 | GC07M081699  | 34.77481108 | <a href="https://www.genecards.org/cgi-bin/carddisp.pl?gene=HGF">https://www.genecards.org/cgi-bin/carddisp.pl?gene=HGF</a>           |
| NFKB1    | Nuclear Factor Kappa B Subunit 1                                       | Protein Coding | 52 | GC04P102501  | 34.63681793 | <a href="https://www.genecards.org/cgi-bin/carddisp.pl?gene=NFKB1">https://www.genecards.org/cgi-bin/carddisp.pl?gene=NFKB1</a>       |
| ANO5     | Anoctamin 5                                                            | Protein Coding | 38 | GC11P021799  | 34.59410858 | <a href="https://www.genecards.org/cgi-bin/carddisp.pl?gene=ANO5">https://www.genecards.org/cgi-bin/carddisp.pl?gene=ANO5</a>         |
| LCAT     | Lecithin-Cholesterol Acyltransferase                                   | Protein Coding | 47 | GC16M067939  | 34.5559082  | <a href="https://www.genecards.org/cgi-bin/carddisp.pl?gene=LCAT">https://www.genecards.org/cgi-bin/carddisp.pl?gene=LCAT</a>         |
| CAT      | Catalase                                                               | Protein Coding | 50 | GC11P034460  | 34.48881531 | <a href="https://www.genecards.org/cgi-bin/carddisp.pl?gene=CAT">https://www.genecards.org/cgi-bin/carddisp.pl?gene=CAT</a>           |
| MIR221   | MicroRNA 221                                                           | RNA Gene       | 20 | GC0XM045746  | 34.46895599 | <a href="https://www.genecards.org/cgi-bin/carddisp.pl?gene=MIR221">https://www.genecards.org/cgi-bin/carddisp.pl?gene=MIR221</a>     |
| PTGS2    | Prostaglandin-Endoperoxide Synthase 2                                  | Protein Coding | 49 | GC01M186640  | 34.3535881  | <a href="https://www.genecards.org/cgi-bin/carddisp.pl?gene=PTGS2">https://www.genecards.org/cgi-bin/carddisp.pl?gene=PTGS2</a>       |
| TIMP1    | TIMP Metalloproteinase Inhibitor 1                                     | Protein Coding | 45 | GC0XP047583  | 34.31763458 | <a href="https://www.genecards.org/cgi-bin/carddisp.pl?gene=TIMP1">https://www.genecards.org/cgi-bin/carddisp.pl?gene=TIMP1</a>       |
| IRS2     | Insulin Receptor Substrate 2                                           | Protein Coding | 45 | GC13M109752  | 34.14591217 | <a href="https://www.genecards.org/cgi-bin/carddisp.pl?gene=IRS2">https://www.genecards.org/cgi-bin/carddisp.pl?gene=IRS2</a>         |
| ESR1     | Estrogen Receptor 1                                                    | Protein Coding | 53 | GC06P151656  | 34.093647   | <a href="https://www.genecards.org/cgi-bin/carddisp.pl?gene=ESR1">https://www.genecards.org/cgi-bin/carddisp.pl?gene=ESR1</a>         |
| FASLG    | Fas Ligand                                                             | Protein Coding | 48 | GC01P172628  | 34.00541687 | <a href="https://www.genecards.org/cgi-bin/carddisp.pl?gene=FASLG">https://www.genecards.org/cgi-bin/carddisp.pl?gene=FASLG</a>       |
| IL1RN    | Interleukin 1 Receptor Antagonist                                      | Protein Coding | 48 | GC02P116694  | 33.9354744  | <a href="https://www.genecards.org/cgi-bin/carddisp.pl?gene=IL1RN">https://www.genecards.org/cgi-bin/carddisp.pl?gene=IL1RN</a>       |
| XBP1     | X-Box Binding Protein 1                                                | Protein Coding | 46 | GC22M028794  | 33.89216995 | <a href="https://www.genecards.org/cgi-bin/carddisp.pl?gene=XBP1">https://www.genecards.org/cgi-bin/carddisp.pl?gene=XBP1</a>         |
| PTPN11   | Protein Tyrosine Phosphatase Non-Receptor Type 11                      | Protein Coding | 54 | GC12P112418  | 33.66088867 | <a href="https://www.genecards.org/cgi-bin/carddisp.pl?gene=PTPN11">https://www.genecards.org/cgi-bin/carddisp.pl?gene=PTPN11</a>     |
| MIR132   | MicroRNA 132                                                           | RNA Gene       | 21 | GC17M002049  | 33.63765335 | <a href="https://www.genecards.org/cgi-bin/carddisp.pl?gene=MIR132">https://www.genecards.org/cgi-bin/carddisp.pl?gene=MIR132</a>     |
| MIR222   | MicroRNA 222                                                           | RNA Gene       | 21 | GC0XM045747  | 33.41287994 | <a href="https://www.genecards.org/cgi-bin/carddisp.pl?gene=MIR222">https://www.genecards.org/cgi-bin/carddisp.pl?gene=MIR222</a>     |
| ADIPOR1  | Adiponectin Receptor 1                                                 | Protein Coding | 45 | GC01M020940  | 33.19025803 | <a href="https://www.genecards.org/cgi-bin/carddisp.pl?gene=ADIPOR1">https://www.genecards.org/cgi-bin/carddisp.pl?gene=ADIPOR1</a>   |
| CDKN2A   | Cyclin Dependent Kinase Inhibitor 2A                                   | Protein Coding | 52 | GC09M021967  | 33.02046204 | <a href="https://www.genecards.org/cgi-bin/carddisp.pl?gene=CDKN2A">https://www.genecards.org/cgi-bin/carddisp.pl?gene=CDKN2A</a>     |
| DDIT3    | DNA Damage Inducible Transcript 3                                      | Protein Coding | 46 | GC12M057516  | 32.84270477 | <a href="https://www.genecards.org/cgi-bin/carddisp.pl?gene=DDIT3">https://www.genecards.org/cgi-bin/carddisp.pl?gene=DDIT3</a>       |
| ADIPOR2  | Adiponectin Receptor 2                                                 | Protein Coding | 43 | GC12P001670  | 32.60053635 | <a href="https://www.genecards.org/cgi-bin/carddisp.pl?gene=ADIPOR2">https://www.genecards.org/cgi-bin/carddisp.pl?gene=ADIPOR2</a>   |
| LITAF    | Lipopolysaccharide Induced TNF Factor                                  | Protein Coding | 45 | GC16M011547  | 32.47165668 | <a href="https://www.genecards.org/cgi-bin/carddisp.pl?gene=LITAF">https://www.genecards.org/cgi-bin/carddisp.pl?gene=LITAF</a>       |
| CYCS     | Cytochrome C, Somatic                                                  | Protein Coding | 49 | GC07M025118  | 32.37697983 | <a href="https://www.genecards.org/cgi-bin/carddisp.pl?gene=CYCS">https://www.genecards.org/cgi-bin/carddisp.pl?gene=CYCS</a>         |
| SDHB     | Succinate Dehydrogenase Complex Iron Sulfur Subunit B                  | Protein Coding | 48 | GC01M017238  | 32.02085114 | <a href="https://www.genecards.org/cgi-bin/carddisp.pl?gene=SDHB">https://www.genecards.org/cgi-bin/carddisp.pl?gene=SDHB</a>         |
| STAT1    | Signal Transducer And Activator Of Transcription 1                     | Protein Coding | 54 | GC02M190908  | 31.95772362 | <a href="https://www.genecards.org/cgi-bin/carddisp.pl?gene=STAT1">https://www.genecards.org/cgi-bin/carddisp.pl?gene=STAT1</a>       |
| MT-CYB   | Mitochondrially Encoded Cytochrome B                                   | Protein Coding | 32 | GCMTPT014749 | 31.85387611 | <a href="https://www.genecards.org/cgi-bin/carddisp.pl?gene=MT-CYB">https://www.genecards.org/cgi-bin/carddisp.pl?gene=MT-CYB</a>     |

|           |                                                       |                |    |             |             |                                                                                                                                         |
|-----------|-------------------------------------------------------|----------------|----|-------------|-------------|-----------------------------------------------------------------------------------------------------------------------------------------|
| BDNF      | Brain Derived Neurotrophic Factor                     | Protein Coding | 48 | GC11M027654 | 31.83507347 | <a href="https://www.genecards.org/cgi-bin/carddisp.pl?gene=BDNF">https://www.genecards.org/cgi-bin/carddisp.pl?gene=BDNF</a>           |
| HP        | Haptoglobin                                           | Protein Coding | 45 | GC16P072089 | 31.81941605 | <a href="https://www.genecards.org/cgi-bin/carddisp.pl?gene=HP">https://www.genecards.org/cgi-bin/carddisp.pl?gene=HP</a>               |
| MIR140    | MicroRNA 140                                          | RNA Gene       | 22 | GC16P069934 | 31.75845909 | <a href="https://www.genecards.org/cgi-bin/carddisp.pl?gene=MIR140">https://www.genecards.org/cgi-bin/carddisp.pl?gene=MIR140</a>       |
| AGT       | Angiotensinogen                                       | Protein Coding | 50 | GC01M230702 | 31.73010635 | <a href="https://www.genecards.org/cgi-bin/carddisp.pl?gene=AGT">https://www.genecards.org/cgi-bin/carddisp.pl?gene=AGT</a>             |
| TM6SF2    | Transmembrane 6 Superfamily Member 2                  | Protein Coding | 29 | GC19M019264 | 31.40005493 | <a href="https://www.genecards.org/cgi-bin/carddisp.pl?gene=TM6SF2">https://www.genecards.org/cgi-bin/carddisp.pl?gene=TM6SF2</a>       |
| MMP2      | Matrix Metalloproteinase 2                            | Protein Coding | 54 | GC16P055390 | 31.33286285 | <a href="https://www.genecards.org/cgi-bin/carddisp.pl?gene=MMP2">https://www.genecards.org/cgi-bin/carddisp.pl?gene=MMP2</a>           |
| ENPP1     | Ectonucleotide Pyrophosphatase/Phosphodiesterase 1    | Protein Coding | 48 | GC06P131808 | 31.26300621 | <a href="https://www.genecards.org/cgi-bin/carddisp.pl?gene=ENPP1">https://www.genecards.org/cgi-bin/carddisp.pl?gene=ENPP1</a>         |
| TGFB2     | Transforming Growth Factor Beta Receptor 2            | Protein Coding | 51 | GC03P030623 | 31.11475754 | <a href="https://www.genecards.org/cgi-bin/carddisp.pl?gene=TGFB2">https://www.genecards.org/cgi-bin/carddisp.pl?gene=TGFB2</a>         |
| FOS       | Fos Proto-Oncogene, AP-1 Transcription Factor Subunit | Protein Coding | 51 | GC14P075278 | 31.08187485 | <a href="https://www.genecards.org/cgi-bin/carddisp.pl?gene=FOS">https://www.genecards.org/cgi-bin/carddisp.pl?gene=FOS</a>             |
| NOS2      | Nitric Oxide Synthase 2                               | Protein Coding | 50 | GC17M027756 | 31.06771851 | <a href="https://www.genecards.org/cgi-bin/carddisp.pl?gene=NOS2">https://www.genecards.org/cgi-bin/carddisp.pl?gene=NOS2</a>           |
| MIR181A1  | MicroRNA 181a-1                                       | RNA Gene       | 19 | GC01M198860 | 31.06432343 | <a href="https://www.genecards.org/cgi-bin/carddisp.pl?gene=MIR181A1">https://www.genecards.org/cgi-bin/carddisp.pl?gene=MIR181A1</a>   |
| JUN       | Jun Proto-Oncogene, AP-1 Transcription Factor Subunit | Protein Coding | 50 | GC01M058780 | 31.01990891 | <a href="https://www.genecards.org/cgi-bin/carddisp.pl?gene=JUN">https://www.genecards.org/cgi-bin/carddisp.pl?gene=JUN</a>             |
| MYC       | MYC Proto-Oncogene, BHLH Transcription Factor         | Protein Coding | 51 | GC08P127735 | 30.94736099 | <a href="https://www.genecards.org/cgi-bin/carddisp.pl?gene=MYC">https://www.genecards.org/cgi-bin/carddisp.pl?gene=MYC</a>             |
| FABP12    | Fatty Acid Binding Protein 12                         | Protein Coding | 32 | GC08M081524 | 30.87104034 | <a href="https://www.genecards.org/cgi-bin/carddisp.pl?gene=FABP12">https://www.genecards.org/cgi-bin/carddisp.pl?gene=FABP12</a>       |
| CYP1A1    | Cytochrome P450 Family 1 Subfamily A Member 1         | Protein Coding | 48 | GC15M074719 | 30.83807373 | <a href="https://www.genecards.org/cgi-bin/carddisp.pl?gene=CYP1A1">https://www.genecards.org/cgi-bin/carddisp.pl?gene=CYP1A1</a>       |
| SLC27A2   | Solute Carrier Family 27 Member 2                     | Protein Coding | 46 | GC15P050182 | 30.83671761 | <a href="https://www.genecards.org/cgi-bin/carddisp.pl?gene=SLC27A2">https://www.genecards.org/cgi-bin/carddisp.pl?gene=SLC27A2</a>     |
| TARDBP    | TAR DNA Binding Protein                               | Protein Coding | 47 | GC01P011013 | 30.79296494 | <a href="https://www.genecards.org/cgi-bin/carddisp.pl?gene=TARDBP">https://www.genecards.org/cgi-bin/carddisp.pl?gene=TARDBP</a>       |
| IL17A     | Interleukin 17A                                       | Protein Coding | 43 | GC06P052186 | 30.76344449 | <a href="https://www.genecards.org/cgi-bin/carddisp.pl?gene=IL17A">https://www.genecards.org/cgi-bin/carddisp.pl?gene=IL17A</a>         |
| SDHD      | Succinate Dehydrogenase Complex Subunit D             | Protein Coding | 45 | GC11P112087 | 30.75510979 | <a href="https://www.genecards.org/cgi-bin/carddisp.pl?gene=SDHD">https://www.genecards.org/cgi-bin/carddisp.pl?gene=SDHD</a>           |
| SLC2A1    | Solute Carrier Family 2 Member 1                      | Protein Coding | 53 | GC01M042925 | 30.74088669 | <a href="https://www.genecards.org/cgi-bin/carddisp.pl?gene=SLC2A1">https://www.genecards.org/cgi-bin/carddisp.pl?gene=SLC2A1</a>       |
| NR1H2     | Nuclear Receptor Subfamily 1 Group H Member 2         | Protein Coding | 49 | GC19P050329 | 30.56098175 | <a href="https://www.genecards.org/cgi-bin/carddisp.pl?gene=NR1H2">https://www.genecards.org/cgi-bin/carddisp.pl?gene=NR1H2</a>         |
| GCKR      | Glucokinase Regulator                                 | Protein Coding | 42 | GC02P027496 | 30.43237877 | <a href="https://www.genecards.org/cgi-bin/carddisp.pl?gene=GCKR">https://www.genecards.org/cgi-bin/carddisp.pl?gene=GCKR</a>           |
| GFER      | Growth Factor, Augmenter Of Liver Regeneration        | Protein Coding | 45 | GC16P001984 | 30.36795425 | <a href="https://www.genecards.org/cgi-bin/carddisp.pl?gene=GFER">https://www.genecards.org/cgi-bin/carddisp.pl?gene=GFER</a>           |
| MT-CO1    | Mitochondrially Encoded Cytochrome C Oxidase I        | Protein Coding | 34 | GCMT005906  | 30.12521744 | <a href="https://www.genecards.org/cgi-bin/carddisp.pl?gene=MT-CO1">https://www.genecards.org/cgi-bin/carddisp.pl?gene=MT-CO1</a>       |
| TNFRSF11B | TNF Receptor Superfamily Member 11b                   | Protein Coding | 48 | GC08M118923 | 30.02269554 | <a href="https://www.genecards.org/cgi-bin/carddisp.pl?gene=TNFRSF11B">https://www.genecards.org/cgi-bin/carddisp.pl?gene=TNFRSF11B</a> |
| PEMT      | Phosphatidylethanolamine N-Methyltransferase          | Protein Coding | 41 | GC17M017506 | 29.98512268 | <a href="https://www.genecards.org/cgi-bin/carddisp.pl?gene=PEMT">https://www.genecards.org/cgi-bin/carddisp.pl?gene=PEMT</a>           |
| COL1A1    | Collagen Type I Alpha 1 Chain                         | Protein Coding | 51 | GC17M050183 | 29.84389877 | <a href="https://www.genecards.org/cgi-bin/carddisp.pl?gene=COL1A1">https://www.genecards.org/cgi-bin/carddisp.pl?gene=COL1A1</a>       |
| MIR107    | MicroRNA 107                                          | RNA Gene       | 19 | GC10M089600 | 29.81664085 | <a href="https://www.genecards.org/cgi-bin/carddisp.pl?gene=MIR107">https://www.genecards.org/cgi-bin/carddisp.pl?gene=MIR107</a>       |
| SLC40A1   | Solute Carrier Family 40 Member 1                     | Protein Coding | 47 | GC02M189560 | 29.70161438 | <a href="https://www.genecards.org/cgi-bin/carddisp.pl?gene=SLC40A1">https://www.genecards.org/cgi-bin/carddisp.pl?gene=SLC40A1</a>     |
| CEBPA     | CCAAT Enhancer Binding Protein Alpha                  | Protein Coding | 48 | GC19M033299 | 29.64617348 | <a href="https://www.genecards.org/cgi-bin/carddisp.pl?gene=CEBPA">https://www.genecards.org/cgi-bin/carddisp.pl?gene=CEBPA</a>         |
| CETP      | Cholesteryl Ester Transfer Protein                    | Protein Coding | 47 | GC16P056961 | 29.60931015 | <a href="https://www.genecards.org/cgi-bin/carddisp.pl?gene=CETP">https://www.genecards.org/cgi-bin/carddisp.pl?gene=CETP</a>           |
| NDUFS1    | NADH:Ubiquinone Oxidoreductase Core Subunit S1        | Protein Coding | 47 | GC02M206114 | 29.59335709 | <a href="https://www.genecards.org/cgi-bin/carddisp.pl?gene=NDUFS1">https://www.genecards.org/cgi-bin/carddisp.pl?gene=NDUFS1</a>       |
| PLAU      | Plasminogen Activator, Urokinase                      | Protein Coding | 52 | GC10P073909 | 29.57400703 | <a href="https://www.genecards.org/cgi-bin/carddisp.pl?gene=PLAU">https://www.genecards.org/cgi-bin/carddisp.pl?gene=PLAU</a>           |
| CYP1A2    | Cytochrome P450 Family 1 Subfamily A Member 2         | Protein Coding | 46 | GC15P074748 | 29.37054825 | <a href="https://www.genecards.org/cgi-bin/carddisp.pl?gene=CYP1A2">https://www.genecards.org/cgi-bin/carddisp.pl?gene=CYP1A2</a>       |
| DGAT1     | Diacylglycerol O-Acyltransferase 1                    | Protein Coding | 47 | GC08M144316 | 29.37005615 | <a href="https://www.genecards.org/cgi-bin/carddisp.pl?gene=DGAT1">https://www.genecards.org/cgi-bin/carddisp.pl?gene=DGAT1</a>         |
| MIR29C    | MicroRNA 29c                                          | RNA Gene       | 18 | GC01M207802 | 29.35494232 | <a href="https://www.genecards.org/cgi-bin/carddisp.pl?gene=MIR29C">https://www.genecards.org/cgi-bin/carddisp.pl?gene=MIR29C</a>       |
| GSTP1     | Glutathione S-Transferase Pi 1                        | Protein Coding | 51 | GC11P067583 | 29.33391595 | <a href="https://www.genecards.org/cgi-bin/carddisp.pl?gene=GSTP1">https://www.genecards.org/cgi-bin/carddisp.pl?gene=GSTP1</a>         |
| SLC27A4   | Solute Carrier Family 27 Member 4                     | Protein Coding | 47 | GC09P128340 | 29.23885918 | <a href="https://www.genecards.org/cgi-bin/carddisp.pl?gene=SLC27A4">https://www.genecards.org/cgi-bin/carddisp.pl?gene=SLC27A4</a>     |
| IFNA1     | Interferon Alpha 1                                    | Protein Coding | 40 | GC09P021522 | 29.23606491 | <a href="https://www.genecards.org/cgi-bin/carddisp.pl?gene=IFNA1">https://www.genecards.org/cgi-bin/carddisp.pl?gene=IFNA1</a>         |
| AKT2      | AKT Serine/Threonine Kinase 2                         | Protein Coding | 54 | GC19M040230 | 29.22427368 | <a href="https://www.genecards.org/cgi-bin/carddisp.pl?gene=AKT2">https://www.genecards.org/cgi-bin/carddisp.pl?gene=AKT2</a>           |
| GSTM1     | Glutathione S-Transferase Mu 1                        | Protein Coding | 43 | GC01P109687 | 29.21365356 | <a href="https://www.genecards.org/cgi-bin/carddisp.pl?gene=GSTM1">https://www.genecards.org/cgi-bin/carddisp.pl?gene=GSTM1</a>         |
| GCG       | Glucagon                                              | Protein Coding | 41 | GC02M162142 | 29.18795395 | <a href="https://www.genecards.org/cgi-bin/carddisp.pl?gene=GCG">https://www.genecards.org/cgi-bin/carddisp.pl?gene=GCG</a>             |
| GRN       | Granulin Precursor                                    | Protein Coding | 47 | GC17P044345 | 29.08464813 | <a href="https://www.genecards.org/cgi-bin/carddisp.pl?gene=GRN">https://www.genecards.org/cgi-bin/carddisp.pl?gene=GRN</a>             |
| AKR1D1    | Aldo-Keto Reductase Family 1 Member                   | Protein Coding | 47 | GC07P138003 | 29.05905914 | <a href="https://www.genecards.org/cgi-bin/carddisp.pl?gene=AKR1D1">https://www.genecards.org/cgi-bin/carddisp.pl?gene=AKR1D1</a>       |
| PCSK9     | Proprotein Convertase Subtilisin/Kexin Type 9         | Protein Coding | 51 | GC01P055039 | 28.94561386 | <a href="https://www.genecards.org/cgi-bin/carddisp.pl?gene=PCSK9">https://www.genecards.org/cgi-bin/carddisp.pl?gene=PCSK9</a>         |
| VDR       | Vitamin D Receptor                                    | Protein Coding | 52 | GC12M047841 | 28.85274124 | <a href="https://www.genecards.org/cgi-bin/carddisp.pl?gene=VDR">https://www.genecards.org/cgi-bin/carddisp.pl?gene=VDR</a>             |
| HNRNPA1   | Heterogeneous Nuclear Ribonucleoprotein A1            | Protein Coding | 47 | GC12P054280 | 28.84785808 | <a href="https://www.genecards.org/cgi-bin/carddisp.pl?gene=HNRNPA1">https://www.genecards.org/cgi-bin/carddisp.pl?gene=HNRNPA1</a>     |
| ALMS1     | ALMS1 Centrosome And Basal Body Associated Protein    | Protein Coding | 42 | GC02P073385 | 28.76959801 | <a href="https://www.genecards.org/cgi-bin/carddisp.pl?gene=ALMS1">https://www.genecards.org/cgi-bin/carddisp.pl?gene=ALMS1</a>         |
| SMAD3     | SMAD Family Member 3                                  | Protein Coding | 50 | GC15P067063 | 28.75627518 | <a href="https://www.genecards.org/cgi-bin/carddisp.pl?gene=SMAD3">https://www.genecards.org/cgi-bin/carddisp.pl?gene=SMAD3</a>         |
| MIR195    | MicroRNA 195                                          | RNA Gene       | 19 | GC17M007018 | 28.73178864 | <a href="https://www.genecards.org/cgi-bin/carddisp.pl?gene=MIR195">https://www.genecards.org/cgi-bin/carddisp.pl?gene=MIR195</a>       |
| CDKN3     | Cyclin Dependent Kinase Inhibitor 3                   | Protein Coding | 43 | GC14P054398 | 28.72810555 | <a href="https://www.genecards.org/cgi-bin/carddisp.pl?gene=CDKN3">https://www.genecards.org/cgi-bin/carddisp.pl?gene=CDKN3</a>         |
| GCK       | Glucokinase                                           | Protein Coding | 51 | GC07M044154 | 28.71801376 | <a href="https://www.genecards.org/cgi-bin/carddisp.pl?gene=GCK">https://www.genecards.org/cgi-bin/carddisp.pl?gene=GCK</a>             |
| AHSG      | Alpha 2-HS Glycoprotein                               | Protein Coding | 44 | GC03P186612 | 28.60829544 | <a href="https://www.genecards.org/cgi-bin/carddisp.pl?gene=AHSG">https://www.genecards.org/cgi-bin/carddisp.pl?gene=AHSG</a>           |
| CTSD      | Cathepsin D                                           | Protein Coding | 52 | GC11M001752 | 28.59474182 | <a href="https://www.genecards.org/cgi-bin/carddisp.pl?gene=CTSD">https://www.genecards.org/cgi-bin/carddisp.pl?gene=CTSD</a>           |
| SLC27A1   | Solute Carrier Family 27 Member 1                     | Protein Coding | 41 | GC19P026639 | 28.4191494  | <a href="https://www.genecards.org/cgi-bin/carddisp.pl?gene=SLC27A1">https://www.genecards.org/cgi-bin/carddisp.pl?gene=SLC27A1</a>     |
| MAP3K5    | Mitogen-Activated Protein Kinase Kinase 5             | Protein Coding | 48 | GC06M136557 | 28.39349556 | <a href="https://www.genecards.org/cgi-bin/carddisp.pl?gene=MAP3K5">https://www.genecards.org/cgi-bin/carddisp.pl?gene=MAP3K5</a>       |
| NLRP3     | NLR Family Pyrin Domain Containing 3                  | Protein Coding | 48 | GC01P247415 | 28.35830688 | <a href="https://www.genecards.org/cgi-bin/carddisp.pl?gene=NLRP3">https://www.genecards.org/cgi-bin/carddisp.pl?gene=NLRP3</a>         |
| TFR2      | Transferrin Receptor 2                                | Protein Coding | 45 | GC07M100620 | 28.3279171  | <a href="https://www.genecards.org/cgi-bin/carddisp.pl?gene=TFR2">https://www.genecards.org/cgi-bin/carddisp.pl?gene=TFR2</a>           |
| AGTR1     | Angiotensin II Receptor Type 1                        | Protein Coding | 51 | GC03P148697 | 28.28638649 | <a href="https://www.genecards.org/cgi-bin/carddisp.pl?gene=AGTR1">https://www.genecards.org/cgi-bin/carddisp.pl?gene=AGTR1</a>         |
| DSP       | Desmoplakin                                           | Protein Coding | 50 | GC06P007541 | 28.1997757  | <a href="https://www.genecards.org/cgi-bin/carddisp.pl?gene=DSP">https://www.genecards.org/cgi-bin/carddisp.pl?gene=DSP</a>             |
| SLC2A4    | Solute Carrier Family 2 Member 4                      | Protein Coding | 47 | GC17P009071 | 28.08086395 | <a href="https://www.genecards.org/cgi-bin/carddisp.pl?gene=SLC2A4">https://www.genecards.org/cgi-bin/carddisp.pl?gene=SLC2A4</a>       |
| DPP4      | Dipeptidyl Peptidase 4                                | Protein Coding | 50 | GC02M161992 | 27.92372894 | <a href="https://www.genecards.org/cgi-bin/carddisp.pl?gene=DPP4">https://www.genecards.org/cgi-bin/carddisp.pl?gene=DPP4</a>           |
| MT-CO3    | Mitochondrially Encoded Cytochrome C Oxidase III      | Protein Coding | 31 | GCMT009209  | 27.90365219 | <a href="https://www.genecards.org/cgi-bin/carddisp.pl?gene=MT-CO3">https://www.genecards.org/cgi-bin/carddisp.pl?gene=MT-CO3</a>       |
| SERPINC1  | Serpin Family C Member 1                              | Protein Coding | 49 | GC01M174251 | 27.83083153 | <a href="https://www.genecards.org/cgi-bin/carddisp.pl?gene=SERPINC1">https://www.genecards.org/cgi-bin/carddisp.pl?gene=SERPINC1</a>   |
| CASR      | Calcium Sensing Receptor                              | Protein Coding | 51 | GC03P122183 | 27.77983093 | <a href="https://www.genecards.org/cgi-bin/carddisp.pl?gene=CASR">https://www.genecards.org/cgi-bin/carddisp.pl?gene=CASR</a>           |
| CES1      | Carboxylesterase 1                                    | Protein Coding | 47 | GC16M055836 | 27.63164139 | <a href="https://www.genecards.org/cgi-bin/carddisp.pl?gene=CES1">https://www.genecards.org/cgi-bin/carddisp.pl?gene=CES1</a>           |
| APOA5     | Apolipoprotein A5                                     | Protein Coding | 45 | GC11M116789 | 27.54660797 | <a href="https://www.genecards.org/cgi-bin/carddisp.pl?gene=APOA5">https://www.genecards.org/cgi-bin/carddisp.pl?gene=APOA5</a>         |
| MIR31     | MicroRNA 31                                           | RNA Gene       | 20 | GC09M021513 | 27.51093292 | <a href="https://www.genecards.org/cgi-bin/carddisp.pl?gene=MIR31">https://www.genecards.org/cgi-bin/carddisp.pl?gene=MIR31</a>         |
| C3        | Complement C3                                         | Protein Coding | 48 | GC19M006677 | 27.40309906 | <a href="https://www.genecards.org/cgi-bin/carddisp.pl?gene=C3">https://www.genecards.org/cgi-bin/carddisp.pl?gene=C3</a>               |
| MIR30A    | MicroRNA 30a                                          | RNA Gene       | 20 | GC06M071403 | 27.36931419 | <a href="https://www.genecards.org/cgi-bin/carddisp.pl?gene=MIR30A">https://www.genecards.org/cgi-bin/carddisp.pl?gene=MIR30A</a>       |
| PIK3R1    | Phosphoinositide-3-Kinase Regulatory Subunit 1        | Protein Coding | 51 | GC05P068215 | 27.31510544 | <a href="https://www.genecards.org/cgi-bin/carddisp.pl?gene=PIK3R1">https://www.genecards.org/cgi-bin/carddisp.pl?gene=PIK3R1</a>       |
| MIR200A   | MicroRNA 200a                                         | RNA Gene       | 22 | GC01P002022 | 27.26833916 | <a href="https://www.genecards.org/cgi-bin/carddisp.pl?gene=MIR200A">https://www.genecards.org/cgi-bin/carddisp.pl?gene=MIR200A</a>     |
| MIR23B    | MicroRNA 23b                                          | RNA Gene       | 19 | GC09P095085 | 27.25074387 | <a href="https://www.genecards.org/cgi-bin/carddisp.pl?gene=MIR23B">https://www.genecards.org/cgi-bin/carddisp.pl?gene=MIR23B</a>       |
| SOC3      | Suppressor Of Cytokine Signaling 3                    | Protein Coding | 45 | GC17M078356 | 27.24120712 | <a href="https://www.genecards.org/cgi-bin/carddisp.pl?gene=SOC3">https://www.genecards.org/cgi-bin/carddisp.pl?gene=SOC3</a>           |
| MIR181B1  | MicroRNA 181b-1                                       | RNA Gene       | 19 | GC01M198858 | 27.18358612 | <a href="https://www.genecards.org/cgi-bin/carddisp.pl?gene=MIR181B1">https://www.genecards.org/cgi-bin/carddisp.pl?gene=MIR181B1</a>   |
| BAX       | BCL2 Associated X, Apoptosis Regulator                | Protein Coding | 49 | GC19P048954 | 27.06827736 | <a href="https://www.genecards.org/cgi-bin/carddisp.pl?gene=BAX">https://www.genecards.org/cgi-bin/carddisp.pl?gene=BAX</a>             |
| CCN2      | Cellular Communication Network Factor 2               | Protein Coding | 40 | GC06M131948 | 27.01944733 | <a href="https://www.genecards.org/cgi-bin/carddisp.pl?gene=CCN2">https://www.genecards.org/cgi-bin/carddisp.pl?gene=CCN2</a>           |
| THBD      | Thrombomodulin                                        | Protein Coding | 44 | GC02M023026 | 26.96779633 | <a href="https://www.genecards.org/cgi-bin/carddisp.pl?gene=THBD">https://www.genecards.org/cgi-bin/carddisp.pl?gene=THBD</a>           |
| ADH1C     | Alcohol Dehydrogenase 1C (Class I), Gamma Polypeptide | Protein Coding | 43 | GC04M099336 | 26.79531097 | <a href="https://www.genecards.org/cgi-bin/carddisp.pl?gene=ADH1C">https://www.genecards.org/cgi-bin/carddisp.pl?gene=ADH1C</a>         |
| LIPE      | Lipase E, Hormone Sensitive Type                      | Protein Coding | 48 | GC19M042401 | 26.70900536 | <a href="https://www.genecards.org/cgi-bin/carddisp.pl?gene=LIPE">https://www.genecards.org/cgi-bin/carddisp.pl?gene=LIPE</a>           |
| F3        | Coagulation Factor III, Tissue Factor                 | Protein Coding | 45 | GC01M094530 | 26.66098785 | <a href="https://www.genecards.org/cgi-bin/carddisp.pl?gene=F3">https://www.genecards.org/cgi-bin/carddisp.pl?gene=F3</a>               |
| MIR199A1  | MicroRNA 199a-1                                       | RNA Gene       | 19 | GC19M010817 | 26.62546349 | <a href="https://www.genecards.org/cgi-bin/carddisp.pl?gene=MIR199A1">https://www.genecards.org/cgi-bin/carddisp.pl?gene=MIR199A1</a>   |
| NAMPT     | Nicotinamide Phosphoribosyltransferase                | Protein Coding | 48 | GC07M106248 | 26.59061813 | <a href="https://www.genecards.org/cgi-bin/carddisp.pl?gene=NAMPT">https://www.genecards.org/cgi-bin/carddisp.pl?gene=NAMPT</a>         |
| ALDH2     | Aldehyde Dehydrogenase 2 Family                       | Protein Coding | 51 | GC12P111766 | 26.49488258 | <a href="https://www.genecards.org/cgi-bin/carddisp.pl?gene=ALDH2">https://www.genecards.org/cgi-bin/carddisp.pl?gene=ALDH2</a>         |
| PKLR      | Pyruvate Kinase L/R                                   | Protein Coding | 48 | GC01M155289 | 26.48228836 | <a href="https://www.genecards.org/cgi-bin/carddisp.pl?gene=PKLR">https://www.genecards.org/cgi-bin/carddisp.pl?gene=PKLR</a>           |
| CYP7A1    | Cytochrome P450 Family 7 Subfamily A Member 1         | Protein Coding | 44 | GC08M058476 | 26.47492027 | <a href="https://www.genecards.org/cgi-bin/carddisp.pl?gene=CYP7A1">https://www.genecards.org/cgi-bin/carddisp.pl?gene=CYP7A1</a>       |

|          |                                                                                                            |                |    |              |             |                                                                                                                                       |
|----------|------------------------------------------------------------------------------------------------------------|----------------|----|--------------|-------------|---------------------------------------------------------------------------------------------------------------------------------------|
| ATP2A2   | ATPase Sarcoplasmic/Endoplasmic Reticulum Ca2+ Transporting 2                                              | Protein Coding | 52 | GC12P110280  | 26.42674637 | <a href="https://www.genecards.org/cgi-bin/carddisp.pl?gene=ATP2A2">https://www.genecards.org/cgi-bin/carddisp.pl?gene=ATP2A2</a>     |
| ASS1     | Argininosuccinate Synthase 1                                                                               | Protein Coding | 49 | GC09P130444  | 26.4234066  | <a href="https://www.genecards.org/cgi-bin/carddisp.pl?gene=ASS1">https://www.genecards.org/cgi-bin/carddisp.pl?gene=ASS1</a>         |
| ACTB     | Actin Beta                                                                                                 | Protein Coding | 50 | GC07M005527  | 26.38704491 | <a href="https://www.genecards.org/cgi-bin/carddisp.pl?gene=ACTB">https://www.genecards.org/cgi-bin/carddisp.pl?gene=ACTB</a>         |
| NDUFS4   | NADH:Ubiquinone Oxidoreductase Subunit S4                                                                  | Protein Coding | 45 | GC05P053560  | 26.36944962 | <a href="https://www.genecards.org/cgi-bin/carddisp.pl?gene=NDUFS4">https://www.genecards.org/cgi-bin/carddisp.pl?gene=NDUFS4</a>     |
| SDHA     | Succinate Dehydrogenase Complex Flavoprotein Subunit A                                                     | Protein Coding | 48 | GC05P000208  | 26.30423355 | <a href="https://www.genecards.org/cgi-bin/carddisp.pl?gene=SDHA">https://www.genecards.org/cgi-bin/carddisp.pl?gene=SDHA</a>         |
| FN1      | Fibronectin 1                                                                                              | Protein Coding | 50 | GC02M215360  | 26.24593925 | <a href="https://www.genecards.org/cgi-bin/carddisp.pl?gene=FN1">https://www.genecards.org/cgi-bin/carddisp.pl?gene=FN1</a>           |
| GHRL     | Ghrelin And Obestatin Prepropeptide                                                                        | Protein Coding | 44 | GC03M010285  | 26.2089653  | <a href="https://www.genecards.org/cgi-bin/carddisp.pl?gene=GHRL">https://www.genecards.org/cgi-bin/carddisp.pl?gene=GHRL</a>         |
| SMARCA4  | SWI/SNF Related, Matrix Associated, Actin Dependent Regulator Of Chromatin, Subfamily A, Member 4          | Protein Coding | 50 | GC19P010932  | 26.17413139 | <a href="https://www.genecards.org/cgi-bin/carddisp.pl?gene=SMARCA4">https://www.genecards.org/cgi-bin/carddisp.pl?gene=SMARCA4</a>   |
| IKBKB    | Inhibitor Of Nuclear Factor Kappa B Kinase Subunit Beta                                                    | Protein Coding | 53 | GC08P042271  | 26.08623123 | <a href="https://www.genecards.org/cgi-bin/carddisp.pl?gene=IKBKB">https://www.genecards.org/cgi-bin/carddisp.pl?gene=IKBKB</a>       |
| NDUFV1   | NADH:Ubiquinone Oxidoreductase Core Subunit V1                                                             | Protein Coding | 47 | GC11P067670  | 26.07613182 | <a href="https://www.genecards.org/cgi-bin/carddisp.pl?gene=NDUFV1">https://www.genecards.org/cgi-bin/carddisp.pl?gene=NDUFV1</a>     |
| SREBF2   | Sterol Regulatory Element Binding Transcription Factor 2                                                   | Protein Coding | 43 | GC22P041833  | 26.01618958 | <a href="https://www.genecards.org/cgi-bin/carddisp.pl?gene=SREBF2">https://www.genecards.org/cgi-bin/carddisp.pl?gene=SREBF2</a>     |
| ACACB    | Acetyl-CoA Carboxylase Beta                                                                                | Protein Coding | 47 | GC12P109116  | 25.94504547 | <a href="https://www.genecards.org/cgi-bin/carddisp.pl?gene=ACACB">https://www.genecards.org/cgi-bin/carddisp.pl?gene=ACACB</a>       |
| HIF1A    | Hypoxia Inducible Factor 1 Subunit Alpha                                                                   | Protein Coding | 48 | GC14P061695  | 25.86544037 | <a href="https://www.genecards.org/cgi-bin/carddisp.pl?gene=HIF1A">https://www.genecards.org/cgi-bin/carddisp.pl?gene=HIF1A</a>       |
| HJV      | Hemojuvelin BMP Co-Receptor                                                                                | Protein Coding | 36 | GC01M146018  | 25.79007912 | <a href="https://www.genecards.org/cgi-bin/carddisp.pl?gene=HJV">https://www.genecards.org/cgi-bin/carddisp.pl?gene=HJV</a>           |
| FGF21    | Fibroblast Growth Factor 21                                                                                | Protein Coding | 40 | GC19P048781  | 25.7541008  | <a href="https://www.genecards.org/cgi-bin/carddisp.pl?gene=FGF21">https://www.genecards.org/cgi-bin/carddisp.pl?gene=FGF21</a>       |
| ALPL     | Alkaline Phosphatase, Biominerization Associated                                                           | Protein Coding | 51 | GC01P021508  | 25.72567749 | <a href="https://www.genecards.org/cgi-bin/carddisp.pl?gene=ALPL">https://www.genecards.org/cgi-bin/carddisp.pl?gene=ALPL</a>         |
| GSK3B    | Glycogen Synthase Kinase 3 Beta                                                                            | Protein Coding | 51 | GC03M119821  | 25.71948242 | <a href="https://www.genecards.org/cgi-bin/carddisp.pl?gene=GSK3B">https://www.genecards.org/cgi-bin/carddisp.pl?gene=GSK3B</a>       |
| CYP2A6   | Cytochrome P450 Family 2 Subfamily A Member 6                                                              | Protein Coding | 48 | GC19M040843  | 25.65201378 | <a href="https://www.genecards.org/cgi-bin/carddisp.pl?gene=CYP2A6">https://www.genecards.org/cgi-bin/carddisp.pl?gene=CYP2A6</a>     |
| MT-ND3   | Mitochondrially Encoded NADH:Ubiquinone Oxidoreductase Core 1-Acylglycerol-3-Phosphate O-Acyltransferase 2 | Protein Coding | 33 | GCMT0P10061  | 25.59578133 | <a href="https://www.genecards.org/cgi-bin/carddisp.pl?gene=MT-ND3">https://www.genecards.org/cgi-bin/carddisp.pl?gene=MT-ND3</a>     |
| AGPAT2   | 1-Acylglycerol-3-Phosphate O-Acyltransferase 2                                                             | Protein Coding | 47 | GC09M136673  | 25.53592682 | <a href="https://www.genecards.org/cgi-bin/carddisp.pl?gene=AGPAT2">https://www.genecards.org/cgi-bin/carddisp.pl?gene=AGPAT2</a>     |
| MIR224   | MicroRNA 224                                                                                               | RNA Gene       | 17 | GC0XM151958  | 25.41087723 | <a href="https://www.genecards.org/cgi-bin/carddisp.pl?gene=MIR224">https://www.genecards.org/cgi-bin/carddisp.pl?gene=MIR224</a>     |
| MSH6     | MutS Homolog 6                                                                                             | Protein Coding | 51 | GC02P047695  | 25.33275223 | <a href="https://www.genecards.org/cgi-bin/carddisp.pl?gene=MSH6">https://www.genecards.org/cgi-bin/carddisp.pl?gene=MSH6</a>         |
| MT-ND6   | Mitochondrially Encoded NADH:Ubiquinone Oxidoreductase Core                                                | Protein Coding | 33 | GCMT0M014151 | 25.23871994 | <a href="https://www.genecards.org/cgi-bin/carddisp.pl?gene=MT-ND6">https://www.genecards.org/cgi-bin/carddisp.pl?gene=MT-ND6</a>     |
| IL6R     | Interleukin 6 Receptor                                                                                     | Protein Coding | 50 | GC01P154405  | 25.18363953 | <a href="https://www.genecards.org/cgi-bin/carddisp.pl?gene=IL6R">https://www.genecards.org/cgi-bin/carddisp.pl?gene=IL6R</a>         |
| BMP6     | Bone Morphogenetic Protein 6                                                                               | Protein Coding | 44 | GC06P007726  | 25.16589737 | <a href="https://www.genecards.org/cgi-bin/carddisp.pl?gene=BMP6">https://www.genecards.org/cgi-bin/carddisp.pl?gene=BMP6</a>         |
| HSPD1    | Heat Shock Protein Family D (Hsp60) Member 1                                                               | Protein Coding | 48 | GC02M197486  | 25.16395569 | <a href="https://www.genecards.org/cgi-bin/carddisp.pl?gene=HSPD1">https://www.genecards.org/cgi-bin/carddisp.pl?gene=HSPD1</a>       |
| FFAR4    | Free Fatty Acid Receptor 4                                                                                 | Protein Coding | 39 | GC10P093566  | 25.0192318  | <a href="https://www.genecards.org/cgi-bin/carddisp.pl?gene=FFAR4">https://www.genecards.org/cgi-bin/carddisp.pl?gene=FFAR4</a>       |
| TNFRSF1B | TNF Receptor Superfamily Member 1B                                                                         | Protein Coding | 48 | GC01P012167  | 24.98200226 | <a href="https://www.genecards.org/cgi-bin/carddisp.pl?gene=TNFRSF1B">https://www.genecards.org/cgi-bin/carddisp.pl?gene=TNFRSF1B</a> |
| PRKAB1   | Protein Kinase AMP-Activated Non-Catalytic Subunit Beta 1                                                  | Protein Coding | 48 | GC12P119632  | 24.95871735 | <a href="https://www.genecards.org/cgi-bin/carddisp.pl?gene=PRKAB1">https://www.genecards.org/cgi-bin/carddisp.pl?gene=PRKAB1</a>     |
| PRKAA1   | Protein Kinase AMP-Activated Catalytic Subunit Alpha 1                                                     | Protein Coding | 48 | GC05M040759  | 24.95615959 | <a href="https://www.genecards.org/cgi-bin/carddisp.pl?gene=PRKAA1">https://www.genecards.org/cgi-bin/carddisp.pl?gene=PRKAA1</a>     |
| BCL2     | BCL2 Apoptosis Regulator                                                                                   | Protein Coding | 51 | GC18M063123  | 24.95194244 | <a href="https://www.genecards.org/cgi-bin/carddisp.pl?gene=BCL2">https://www.genecards.org/cgi-bin/carddisp.pl?gene=BCL2</a>         |
| COX5A    | Cytochrome C Oxidase Subunit 5A                                                                            | Protein Coding | 45 | GC15M074919  | 24.93875122 | <a href="https://www.genecards.org/cgi-bin/carddisp.pl?gene=COX5A">https://www.genecards.org/cgi-bin/carddisp.pl?gene=COX5A</a>       |
| H19      | H19 Imprinted Maternally Expressed Transcript                                                              | RNA Gene       | 28 | GC11M001995  | 24.76796341 | <a href="https://www.genecards.org/cgi-bin/carddisp.pl?gene=H19">https://www.genecards.org/cgi-bin/carddisp.pl?gene=H19</a>           |
| ELANE    | Elastase, Neutrophil Expressed                                                                             | Protein Coding | 47 | GC19P000855  | 24.69678497 | <a href="https://www.genecards.org/cgi-bin/carddisp.pl?gene=ELANE">https://www.genecards.org/cgi-bin/carddisp.pl?gene=ELANE</a>       |
| RARRES2  | Retinoic Acid Receptor Responder 2                                                                         | Protein Coding | 40 | GC07M150333  | 24.6766777  | <a href="https://www.genecards.org/cgi-bin/carddisp.pl?gene=RARRES2">https://www.genecards.org/cgi-bin/carddisp.pl?gene=RARRES2</a>   |
| UGT1A7   | UDP Glucuronosyltransferase Family 1 Member A7                                                             | Protein Coding | 39 | GC02P233681  | 24.61125755 | <a href="https://www.genecards.org/cgi-bin/carddisp.pl?gene=UGT1A7">https://www.genecards.org/cgi-bin/carddisp.pl?gene=UGT1A7</a>     |
| VIM      | Vimentin                                                                                                   | Protein Coding | 51 | GC10P017227  | 24.5502224  | <a href="https://www.genecards.org/cgi-bin/carddisp.pl?gene=VIM">https://www.genecards.org/cgi-bin/carddisp.pl?gene=VIM</a>           |
| ITCH     | Itchy E3 Ubiquitin Protein Ligase                                                                          | Protein Coding | 46 | GC20P034363  | 24.52334976 | <a href="https://www.genecards.org/cgi-bin/carddisp.pl?gene=ITCH">https://www.genecards.org/cgi-bin/carddisp.pl?gene=ITCH</a>         |
| AIFM1    | Apoptosis Inducing Factor Mitochondria Associated 1                                                        | Protein Coding | 50 | GC0XM130129  | 24.51913452 | <a href="https://www.genecards.org/cgi-bin/carddisp.pl?gene=AIFM1">https://www.genecards.org/cgi-bin/carddisp.pl?gene=AIFM1</a>       |
| CDKN1A   | Cyclin Dependent Kinase Inhibitor 1A                                                                       | Protein Coding | 50 | GC06P055348  | 24.48690414 | <a href="https://www.genecards.org/cgi-bin/carddisp.pl?gene=CDKN1A">https://www.genecards.org/cgi-bin/carddisp.pl?gene=CDKN1A</a>     |
| FGF23    | Fibroblast Growth Factor 23                                                                                | Protein Coding | 46 | GC12M004368  | 24.33061218 | <a href="https://www.genecards.org/cgi-bin/carddisp.pl?gene=FGF23">https://www.genecards.org/cgi-bin/carddisp.pl?gene=FGF23</a>       |
| PLIN2    | Perilipin 2                                                                                                | Protein Coding | 44 | GC09M019127  | 24.32180786 | <a href="https://www.genecards.org/cgi-bin/carddisp.pl?gene=PLIN2">https://www.genecards.org/cgi-bin/carddisp.pl?gene=PLIN2</a>       |
| MIR200C  | MicroRNA 200c                                                                                              | RNA Gene       | 21 | GC12P011871  | 24.12338257 | <a href="https://www.genecards.org/cgi-bin/carddisp.pl?gene=MIR200C">https://www.genecards.org/cgi-bin/carddisp.pl?gene=MIR200C</a>   |
| FGA      | Fibrinogen Alpha Chain                                                                                     | Protein Coding | 48 | GC04M154583  | 24.08589172 | <a href="https://www.genecards.org/cgi-bin/carddisp.pl?gene=FGA">https://www.genecards.org/cgi-bin/carddisp.pl?gene=FGA</a>           |
| A2M      | Alpha-2-Macroglobulin                                                                                      | Protein Coding | 47 | GC12M009067  | 23.90711975 | <a href="https://www.genecards.org/cgi-bin/carddisp.pl?gene=A2M">https://www.genecards.org/cgi-bin/carddisp.pl?gene=A2M</a>           |
| MIR125A  | MicroRNA 125a                                                                                              | RNA Gene       | 21 | GC19P051720  | 23.89912224 | <a href="https://www.genecards.org/cgi-bin/carddisp.pl?gene=MIR125A">https://www.genecards.org/cgi-bin/carddisp.pl?gene=MIR125A</a>   |
| MT-CO2   | Mitochondrially Encoded Cytochrome C Oxidase II                                                            | Protein Coding | 34 | GCMT0P007587 | 23.81887436 | <a href="https://www.genecards.org/cgi-bin/carddisp.pl?gene=MT-CO2">https://www.genecards.org/cgi-bin/carddisp.pl?gene=MT-CO2</a>     |
| BTNL2    | Butyrophilin Like 2                                                                                        | Protein Coding | 39 | GC06M032393  | 23.80173492 | <a href="https://www.genecards.org/cgi-bin/carddisp.pl?gene=BTNL2">https://www.genecards.org/cgi-bin/carddisp.pl?gene=BTNL2</a>       |
| LPA      | Lipoprotein(A)                                                                                             | Protein Coding | 42 | GC06M160531  | 23.78948212 | <a href="https://www.genecards.org/cgi-bin/carddisp.pl?gene=LPA">https://www.genecards.org/cgi-bin/carddisp.pl?gene=LPA</a>           |
| SDHC     | Succinate Dehydrogenase Complex Subunit C                                                                  | Protein Coding | 45 | GC01P161314  | 23.74804688 | <a href="https://www.genecards.org/cgi-bin/carddisp.pl?gene=SDHC">https://www.genecards.org/cgi-bin/carddisp.pl?gene=SDHC</a>         |
| SELE     | Selectin E                                                                                                 | Protein Coding | 44 | GC01M169722  | 23.58281708 | <a href="https://www.genecards.org/cgi-bin/carddisp.pl?gene=SELE">https://www.genecards.org/cgi-bin/carddisp.pl?gene=SELE</a>         |
| IGF1R    | Insulin Like Growth Factor 1 Receptor                                                                      | Protein Coding | 55 | GC15P098648  | 23.55892944 | <a href="https://www.genecards.org/cgi-bin/carddisp.pl?gene=IGF1R">https://www.genecards.org/cgi-bin/carddisp.pl?gene=IGF1R</a>       |
| NR1I2    | Nuclear Receptor Subfamily 1 Group 1 Member 2                                                              | Protein Coding | 47 | GC03P119780  | 23.4993782  | <a href="https://www.genecards.org/cgi-bin/carddisp.pl?gene=NR1I2">https://www.genecards.org/cgi-bin/carddisp.pl?gene=NR1I2</a>       |
| FTL      | Ferritin Light Chain                                                                                       | Protein Coding | 48 | GC19P048965  | 23.48954773 | <a href="https://www.genecards.org/cgi-bin/carddisp.pl?gene=FTL">https://www.genecards.org/cgi-bin/carddisp.pl?gene=FTL</a>           |
| PDGFRB   | Platelet Derived Growth Factor Receptor Beta                                                               | Protein Coding | 55 | GC05M150113  | 23.46020126 | <a href="https://www.genecards.org/cgi-bin/carddisp.pl?gene=PDGFRB">https://www.genecards.org/cgi-bin/carddisp.pl?gene=PDGFRB</a>     |
| UGT1A6   | UDP Glucuronosyltransferase Family 1 Member A6                                                             | Protein Coding | 42 | GC02P233691  | 23.270998   | <a href="https://www.genecards.org/cgi-bin/carddisp.pl?gene=UGT1A6">https://www.genecards.org/cgi-bin/carddisp.pl?gene=UGT1A6</a>     |
| MSR1     | Macrophage Scavenger Receptor 1                                                                            | Protein Coding | 47 | GC08M016107  | 23.25499344 | <a href="https://www.genecards.org/cgi-bin/carddisp.pl?gene=MSR1">https://www.genecards.org/cgi-bin/carddisp.pl?gene=MSR1</a>         |
| NPPB     | Natriuretic Peptide B                                                                                      | Protein Coding | 44 | GC01M011858  | 23.25296783 | <a href="https://www.genecards.org/cgi-bin/carddisp.pl?gene=NPPB">https://www.genecards.org/cgi-bin/carddisp.pl?gene=NPPB</a>         |
| CXCL10   | C-X-C Motif Chemokine Ligand 10                                                                            | Protein Coding | 45 | GC04M076021  | 23.22422409 | <a href="https://www.genecards.org/cgi-bin/carddisp.pl?gene=CXCL10">https://www.genecards.org/cgi-bin/carddisp.pl?gene=CXCL10</a>     |
| IFIH1    | Interferon Induced With Helicase C Domain 1                                                                | Protein Coding | 48 | GC02M162267  | 23.21790695 | <a href="https://www.genecards.org/cgi-bin/carddisp.pl?gene=IFIH1">https://www.genecards.org/cgi-bin/carddisp.pl?gene=IFIH1</a>       |
| XDH      | Xanthine Dehydrogenase                                                                                     | Protein Coding | 47 | GC02M031334  | 23.17886925 | <a href="https://www.genecards.org/cgi-bin/carddisp.pl?gene=XDH">https://www.genecards.org/cgi-bin/carddisp.pl?gene=XDH</a>           |
| ATF4     | Activating Transcription Factor 4                                                                          | Protein Coding | 47 | GC22P039547  | 23.17003822 | <a href="https://www.genecards.org/cgi-bin/carddisp.pl?gene=ATF4">https://www.genecards.org/cgi-bin/carddisp.pl?gene=ATF4</a>         |
| MYH9     | Myosin Heavy Chain 9                                                                                       | Protein Coding | 50 | GC22M036281  | 23.12662125 | <a href="https://www.genecards.org/cgi-bin/carddisp.pl?gene=MYH9">https://www.genecards.org/cgi-bin/carddisp.pl?gene=MYH9</a>         |
| TGFBR1   | Transforming Growth Factor Beta Receptor 1                                                                 | Protein Coding | 54 | GC09P099104  | 23.08447647 | <a href="https://www.genecards.org/cgi-bin/carddisp.pl?gene=TGFBR1">https://www.genecards.org/cgi-bin/carddisp.pl?gene=TGFBR1</a>     |
| IDH1     | Isocitrate Dehydrogenase (NADP(+)) 1                                                                       | Protein Coding | 53 | GC02M208236  | 23.08345795 | <a href="https://www.genecards.org/cgi-bin/carddisp.pl?gene=IDH1">https://www.genecards.org/cgi-bin/carddisp.pl?gene=IDH1</a>         |
| KRT7     | Keratin 7                                                                                                  | Protein Coding | 43 | GC12P052232  | 23.07139206 | <a href="https://www.genecards.org/cgi-bin/carddisp.pl?gene=KRT7">https://www.genecards.org/cgi-bin/carddisp.pl?gene=KRT7</a>         |
| KRT19    | Keratin 19                                                                                                 | Protein Coding | 46 | GC17M041523  | 23.06446457 | <a href="https://www.genecards.org/cgi-bin/carddisp.pl?gene=KRT19">https://www.genecards.org/cgi-bin/carddisp.pl?gene=KRT19</a>       |
| ADA2     | Adenosine Deaminase 2                                                                                      | Protein Coding | 34 | GC22M017179  | 23.01762009 | <a href="https://www.genecards.org/cgi-bin/carddisp.pl?gene=ADA2">https://www.genecards.org/cgi-bin/carddisp.pl?gene=ADA2</a>         |
| POMC     | Proopiomelanocortin                                                                                        | Protein Coding | 48 | GC02M025160  | 22.94438934 | <a href="https://www.genecards.org/cgi-bin/carddisp.pl?gene=POMC">https://www.genecards.org/cgi-bin/carddisp.pl?gene=POMC</a>         |
| NFE2L2   | Nuclear Factor, Erythroid 2 Like 2                                                                         | Protein Coding | 50 | GC02M177227  | 22.85059738 | <a href="https://www.genecards.org/cgi-bin/carddisp.pl?gene=NFE2L2">https://www.genecards.org/cgi-bin/carddisp.pl?gene=NFE2L2</a>     |
| ALPP     | Alkaline Phosphatase, Placental                                                                            | Protein Coding | 47 | GC02P232378  | 22.80949783 | <a href="https://www.genecards.org/cgi-bin/carddisp.pl?gene=ALPP">https://www.genecards.org/cgi-bin/carddisp.pl?gene=ALPP</a>         |
| TLR9     | Toll Like Receptor 9                                                                                       | Protein Coding | 45 | GC03M052222  | 22.79990768 | <a href="https://www.genecards.org/cgi-bin/carddisp.pl?gene=TLR9">https://www.genecards.org/cgi-bin/carddisp.pl?gene=TLR9</a>         |
| MIR130A  | MicroRNA 130a                                                                                              | RNA Gene       | 20 | GC11P057641  | 22.72928238 | <a href="https://www.genecards.org/cgi-bin/carddisp.pl?gene=MIR130A">https://www.genecards.org/cgi-bin/carddisp.pl?gene=MIR130A</a>   |
| MAPK14   | Mitogen-Activated Protein Kinase 14                                                                        | Protein Coding | 52 | GC06P055339  | 22.71913147 | <a href="https://www.genecards.org/cgi-bin/carddisp.pl?gene=MAPK14">https://www.genecards.org/cgi-bin/carddisp.pl?gene=MAPK14</a>     |
| PRKCG    | Protein Kinase C Theta                                                                                     | Protein Coding | 50 | GC10M006393  | 22.58216286 | <a href="https://www.genecards.org/cgi-bin/carddisp.pl?gene=PRKCG">https://www.genecards.org/cgi-bin/carddisp.pl?gene=PRKCG</a>       |
| VCAM1    | Vascular Cell Adhesion Molecule 1                                                                          | Protein Coding | 46 | GC01P100719  | 22.57697296 | <a href="https://www.genecards.org/cgi-bin/carddisp.pl?gene=VCAM1">https://www.genecards.org/cgi-bin/carddisp.pl?gene=VCAM1</a>       |
| UGT1A8   | UDP Glucuronosyltransferase Family 1 Member A8                                                             | Protein Coding | 36 | GC02P233618  | 22.53224373 | <a href="https://www.genecards.org/cgi-bin/carddisp.pl?gene=UGT1A8">https://www.genecards.org/cgi-bin/carddisp.pl?gene=UGT1A8</a>     |
| NDUFS2   | NADH:Ubiquinone Oxidoreductase Core Subunit S2                                                             | Protein Coding | 45 | GC01P161197  | 22.51537323 | <a href="https://www.genecards.org/cgi-bin/carddisp.pl?gene=NDUFS2">https://www.genecards.org/cgi-bin/carddisp.pl?gene=NDUFS2</a>     |
| FGF19    | Fibroblast Growth Factor 19                                                                                | Protein Coding | 44 | GC11M070382  | 22.49826813 | <a href="https://www.genecards.org/cgi-bin/carddisp.pl?gene=FGF19">https://www.genecards.org/cgi-bin/carddisp.pl?gene=FGF19</a>       |

|          |                                                             |                |    |             |             |                                                                                                                                       |
|----------|-------------------------------------------------------------|----------------|----|-------------|-------------|---------------------------------------------------------------------------------------------------------------------------------------|
| ERN1     | Endoplasmic Reticulum To Nucleus Signaling 1                | Protein Coding | 46 | GC17M064039 | 22.49084854 | <a href="https://www.genecards.org/cgi-bin/carddisp.pl?gene=ERN1">https://www.genecards.org/cgi-bin/carddisp.pl?gene=ERN1</a>         |
| SPINK1   | Serine Peptidase Inhibitor Kazal Type 1                     | Protein Coding | 44 | GC05M147825 | 22.4596138  | <a href="https://www.genecards.org/cgi-bin/carddisp.pl?gene=SPINK1">https://www.genecards.org/cgi-bin/carddisp.pl?gene=SPINK1</a>     |
| EIF2AK4  | Eukaryotic Translation Initiation Factor 2 Alpha Kinase 4   | Protein Coding | 45 | GC15P039934 | 22.43599892 | <a href="https://www.genecards.org/cgi-bin/carddisp.pl?gene=EIF2AK4">https://www.genecards.org/cgi-bin/carddisp.pl?gene=EIF2AK4</a>   |
| BGLAP    | Bone Gamma-Carboxyglutamate Protein                         | Protein Coding | 41 | GC01P156242 | 22.3146019  | <a href="https://www.genecards.org/cgi-bin/carddisp.pl?gene=BGLAP">https://www.genecards.org/cgi-bin/carddisp.pl?gene=BGLAP</a>       |
| CCL5     | C-C Motif Chemokine Ligand 5                                | Protein Coding | 44 | GC17M035871 | 22.25790977 | <a href="https://www.genecards.org/cgi-bin/carddisp.pl?gene=CCL5">https://www.genecards.org/cgi-bin/carddisp.pl?gene=CCL5</a>         |
| TBP      | TATA-Box Binding Protein                                    | Protein Coding | 49 | GC06P170554 | 22.20865059 | <a href="https://www.genecards.org/cgi-bin/carddisp.pl?gene=TBP">https://www.genecards.org/cgi-bin/carddisp.pl?gene=TBP</a>           |
| MIR16-1  | MicroRNA 16-1                                               | RNA Gene       | 22 | GC13M050048 | 22.20575523 | <a href="https://www.genecards.org/cgi-bin/carddisp.pl?gene=MIR16-1">https://www.genecards.org/cgi-bin/carddisp.pl?gene=MIR16-1</a>   |
| MIR29B1  | MicroRNA 29b-1                                              | RNA Gene       | 20 | GC07M130877 | 22.15891647 | <a href="https://www.genecards.org/cgi-bin/carddisp.pl?gene=MIR29B1">https://www.genecards.org/cgi-bin/carddisp.pl?gene=MIR29B1</a>   |
| IFNA2    | Interferon Alpha 2                                          | Protein Coding | 41 | GC09M021384 | 22.1397171  | <a href="https://www.genecards.org/cgi-bin/carddisp.pl?gene=IFNA2">https://www.genecards.org/cgi-bin/carddisp.pl?gene=IFNA2</a>       |
| NDUFS7   | NADH:Ubiquinone Oxidoreductase Core Subunit S7              | Protein Coding | 47 | GC19P001635 | 22.11656189 | <a href="https://www.genecards.org/cgi-bin/carddisp.pl?gene=NDUFS7">https://www.genecards.org/cgi-bin/carddisp.pl?gene=NDUFS7</a>     |
| SHH      | Sonic Hedgehog Signaling Molecule                           | Protein Coding | 50 | GC07M155799 | 22.06713486 | <a href="https://www.genecards.org/cgi-bin/carddisp.pl?gene=SHH">https://www.genecards.org/cgi-bin/carddisp.pl?gene=SHH</a>           |
| MIRLET7D | MicroRNA Let-7d                                             | RNA Gene       | 21 | GC09P094178 | 21.96260452 | <a href="https://www.genecards.org/cgi-bin/carddisp.pl?gene=MIRLET7D">https://www.genecards.org/cgi-bin/carddisp.pl?gene=MIRLET7D</a> |
| EIF2S1   | Eukaryotic Translation Initiation Factor 2 Subunit Alpha    | Protein Coding | 45 | GC14P067359 | 21.94793892 | <a href="https://www.genecards.org/cgi-bin/carddisp.pl?gene=EIF2S1">https://www.genecards.org/cgi-bin/carddisp.pl?gene=EIF2S1</a>     |
| LCN2     | Lipocalin 2                                                 | Protein Coding | 44 | GC09P128149 | 21.90474701 | <a href="https://www.genecards.org/cgi-bin/carddisp.pl?gene=LCN2">https://www.genecards.org/cgi-bin/carddisp.pl?gene=LCN2</a>         |
| UGT1A9   | UDP Glucuronosyltransferase Family 1 Member A9              | Protein Coding | 44 | GC02P233671 | 21.84596825 | <a href="https://www.genecards.org/cgi-bin/carddisp.pl?gene=UGT1A9">https://www.genecards.org/cgi-bin/carddisp.pl?gene=UGT1A9</a>     |
| HBA1     | Hemoglobin Subunit Alpha 1                                  | Protein Coding | 43 | GC16P005490 | 21.71658516 | <a href="https://www.genecards.org/cgi-bin/carddisp.pl?gene=HBA1">https://www.genecards.org/cgi-bin/carddisp.pl?gene=HBA1</a>         |
| RXRA     | Retinoid X Receptor Alpha                                   | Protein Coding | 51 | GC09P134317 | 21.71615219 | <a href="https://www.genecards.org/cgi-bin/carddisp.pl?gene=RXRA">https://www.genecards.org/cgi-bin/carddisp.pl?gene=RXRA</a>         |
| SELP     | Selectin P                                                  | Protein Coding | 46 | GC01M169558 | 21.67138672 | <a href="https://www.genecards.org/cgi-bin/carddisp.pl?gene=SELP">https://www.genecards.org/cgi-bin/carddisp.pl?gene=SELP</a>         |
| CNR1     | Cannabinoid Receptor 1                                      | Protein Coding | 47 | GC06M088139 | 21.61171913 | <a href="https://www.genecards.org/cgi-bin/carddisp.pl?gene=CNR1">https://www.genecards.org/cgi-bin/carddisp.pl?gene=CNR1</a>         |
| CXCR4    | C-X-C Motif Chemokine Receptor 4                            | Protein Coding | 52 | GC02M136114 | 21.59842873 | <a href="https://www.genecards.org/cgi-bin/carddisp.pl?gene=CXCR4">https://www.genecards.org/cgi-bin/carddisp.pl?gene=CXCR4</a>       |
| MIRLET7C | MicroRNA Let-7c                                             | RNA Gene       | 22 | GC21P106551 | 21.58302879 | <a href="https://www.genecards.org/cgi-bin/carddisp.pl?gene=MIRLET7C">https://www.genecards.org/cgi-bin/carddisp.pl?gene=MIRLET7C</a> |
| LGALS3   | Galectin 3                                                  | Protein Coding | 45 | GC14P055124 | 21.55549622 | <a href="https://www.genecards.org/cgi-bin/carddisp.pl?gene=LGALS3">https://www.genecards.org/cgi-bin/carddisp.pl?gene=LGALS3</a>     |
| TET2     | Tet Methylcytosine Dioxygenase 2                            | Protein Coding | 45 | GC04P105145 | 21.51708221 | <a href="https://www.genecards.org/cgi-bin/carddisp.pl?gene=TET2">https://www.genecards.org/cgi-bin/carddisp.pl?gene=TET2</a>         |
| EP300    | E1A Binding Protein P300                                    | Protein Coding | 51 | GC22P041091 | 21.46718597 | <a href="https://www.genecards.org/cgi-bin/carddisp.pl?gene=EP300">https://www.genecards.org/cgi-bin/carddisp.pl?gene=EP300</a>       |
| TCF7L2   | Transcription Factor 7 Like 2                               | Protein Coding | 46 | GC10P112950 | 21.46273422 | <a href="https://www.genecards.org/cgi-bin/carddisp.pl?gene=TCF7L2">https://www.genecards.org/cgi-bin/carddisp.pl?gene=TCF7L2</a>     |
| ADRB2    | Adrenoceptor Beta 2                                         | Protein Coding | 50 | GC05P148825 | 21.45920944 | <a href="https://www.genecards.org/cgi-bin/carddisp.pl?gene=ADRB2">https://www.genecards.org/cgi-bin/carddisp.pl?gene=ADRB2</a>       |
| NDUFV2   | NADH:Ubiquinone Oxidoreductase Core Subunit V2              | Protein Coding | 45 | GC18P009092 | 21.40446472 | <a href="https://www.genecards.org/cgi-bin/carddisp.pl?gene=NDUFV2">https://www.genecards.org/cgi-bin/carddisp.pl?gene=NDUFV2</a>     |
| MIR33A   | MicroRNA 33a                                                | RNA Gene       | 19 | GC22P041900 | 21.35975266 | <a href="https://www.genecards.org/cgi-bin/carddisp.pl?gene=MIR33A">https://www.genecards.org/cgi-bin/carddisp.pl?gene=MIR33A</a>     |
| MST1     | Macrophage Stimulating 1                                    | Protein Coding | 46 | GC03M049683 | 21.30723381 | <a href="https://www.genecards.org/cgi-bin/carddisp.pl?gene=MST1">https://www.genecards.org/cgi-bin/carddisp.pl?gene=MST1</a>         |
| COX6A1   | Cytochrome C Oxidase Subunit 6A1                            | Protein Coding | 45 | GC12P120439 | 21.29756927 | <a href="https://www.genecards.org/cgi-bin/carddisp.pl?gene=COX6A1">https://www.genecards.org/cgi-bin/carddisp.pl?gene=COX6A1</a>     |
| LIVAR    | Liver Cell Viability Associated LncRNA                      | RNA Gene       | 10 | GC18M070336 | 21.27138519 | <a href="https://www.genecards.org/cgi-bin/carddisp.pl?gene=LIVAR">https://www.genecards.org/cgi-bin/carddisp.pl?gene=LIVAR</a>       |
| CD14     | CD14 Molecule                                               | Protein Coding | 45 | GC05M140631 | 21.18961334 | <a href="https://www.genecards.org/cgi-bin/carddisp.pl?gene=CD14">https://www.genecards.org/cgi-bin/carddisp.pl?gene=CD14</a>         |
| FLT1     | Fms Related Receptor Tyrosine Kinase 1                      | Protein Coding | 51 | GC13M028300 | 21.17339325 | <a href="https://www.genecards.org/cgi-bin/carddisp.pl?gene=FLT1">https://www.genecards.org/cgi-bin/carddisp.pl?gene=FLT1</a>         |
| LRP6     | LDL Receptor Related Protein 6                              | Protein Coding | 49 | GC12M015714 | 21.11747742 | <a href="https://www.genecards.org/cgi-bin/carddisp.pl?gene=LRP6">https://www.genecards.org/cgi-bin/carddisp.pl?gene=LRP6</a>         |
| MIR26A1  | MicroRNA 26a-1                                              | RNA Gene       | 20 | GC03P037969 | 21.05493164 | <a href="https://www.genecards.org/cgi-bin/carddisp.pl?gene=MIR26A1">https://www.genecards.org/cgi-bin/carddisp.pl?gene=MIR26A1</a>   |
| EIF2AK3  | Eukaryotic Translation Initiation Factor 2 Alpha Kinase 3   | Protein Coding | 50 | GC02M088556 | 21.0508213  | <a href="https://www.genecards.org/cgi-bin/carddisp.pl?gene=EIF2AK3">https://www.genecards.org/cgi-bin/carddisp.pl?gene=EIF2AK3</a>   |
| TNFAIP3  | TNF Alpha Induced Protein 3                                 | Protein Coding | 48 | GC06P137866 | 21.04412079 | <a href="https://www.genecards.org/cgi-bin/carddisp.pl?gene=TNFAIP3">https://www.genecards.org/cgi-bin/carddisp.pl?gene=TNFAIP3</a>   |
| IGFBP3   | Insulin Like Growth Factor Binding                          | Protein Coding | 45 | GC07M045912 | 21.04045677 | <a href="https://www.genecards.org/cgi-bin/carddisp.pl?gene=IGFBP3">https://www.genecards.org/cgi-bin/carddisp.pl?gene=IGFBP3</a>     |
| MIR141   | MicroRNA 141                                                | RNA Gene       | 22 | GC12P011872 | 21.01330948 | <a href="https://www.genecards.org/cgi-bin/carddisp.pl?gene=MIR141">https://www.genecards.org/cgi-bin/carddisp.pl?gene=MIR141</a>     |
| MIR183   | MicroRNA 183                                                | RNA Gene       | 18 | GC07M129798 | 21.00595474 | <a href="https://www.genecards.org/cgi-bin/carddisp.pl?gene=MIR183">https://www.genecards.org/cgi-bin/carddisp.pl?gene=MIR183</a>     |
| NDUFB9   | NADH:Ubiquinone Oxidoreductase Subunit B9                   | Protein Coding | 45 | GC08P124539 | 20.99195862 | <a href="https://www.genecards.org/cgi-bin/carddisp.pl?gene=NDUFB9">https://www.genecards.org/cgi-bin/carddisp.pl?gene=NDUFB9</a>     |
| ERCC2    | ERCC Excision Repair 2, TFIIF Core Complex Helicase Subunit | Protein Coding | 48 | GC19M045349 | 20.98767281 | <a href="https://www.genecards.org/cgi-bin/carddisp.pl?gene=ERCC2">https://www.genecards.org/cgi-bin/carddisp.pl?gene=ERCC2</a>       |
| TNFSF11  | TNF Superfamily Member 11                                   | Protein Coding | 48 | GC13P042562 | 20.97611237 | <a href="https://www.genecards.org/cgi-bin/carddisp.pl?gene=TNFSF11">https://www.genecards.org/cgi-bin/carddisp.pl?gene=TNFSF11</a>   |
| MIR144   | MicroRNA 144                                                | RNA Gene       | 17 | GC17M031086 | 20.89792252 | <a href="https://www.genecards.org/cgi-bin/carddisp.pl?gene=MIR144">https://www.genecards.org/cgi-bin/carddisp.pl?gene=MIR144</a>     |
| MDM2     | MDM2 Proto-Oncogene                                         | Protein Coding | 53 | GC12P068808 | 20.87329674 | <a href="https://www.genecards.org/cgi-bin/carddisp.pl?gene=MDM2">https://www.genecards.org/cgi-bin/carddisp.pl?gene=MDM2</a>         |
| MIR451A  | MicroRNA 451a                                               | RNA Gene       | 18 | GC17M028861 | 20.86265373 | <a href="https://www.genecards.org/cgi-bin/carddisp.pl?gene=MIR451A">https://www.genecards.org/cgi-bin/carddisp.pl?gene=MIR451A</a>   |
| CPS1     | Carbamoyl-Phosphate Synthase 1                              | Protein Coding | 46 | GC02P210477 | 20.84814072 | <a href="https://www.genecards.org/cgi-bin/carddisp.pl?gene=CPS1">https://www.genecards.org/cgi-bin/carddisp.pl?gene=CPS1</a>         |
| DGAT2    | Diacylglycerol O-Acyltransferase 2                          | Protein Coding | 44 | GC11P075759 | 20.81304932 | <a href="https://www.genecards.org/cgi-bin/carddisp.pl?gene=DGAT2">https://www.genecards.org/cgi-bin/carddisp.pl?gene=DGAT2</a>       |
| SHBG     | Sex Hormone Binding Globulin                                | Protein Coding | 41 | GC17P007613 | 20.80622482 | <a href="https://www.genecards.org/cgi-bin/carddisp.pl?gene=SHBG">https://www.genecards.org/cgi-bin/carddisp.pl?gene=SHBG</a>         |
| CTSB     | Cathepsin B                                                 | Protein Coding | 51 | GC08M011842 | 20.73703384 | <a href="https://www.genecards.org/cgi-bin/carddisp.pl?gene=CTSB">https://www.genecards.org/cgi-bin/carddisp.pl?gene=CTSB</a>         |
| NR5A2    | Nuclear Receptor Subfamily 5 Group A Member 2               | Protein Coding | 47 | GC01P199996 | 20.71928215 | <a href="https://www.genecards.org/cgi-bin/carddisp.pl?gene=NR5A2">https://www.genecards.org/cgi-bin/carddisp.pl?gene=NR5A2</a>       |
| DNMT1    | DNA Methyltransferase 1                                     | Protein Coding | 51 | GC19M010133 | 20.66369629 | <a href="https://www.genecards.org/cgi-bin/carddisp.pl?gene=DNMT1">https://www.genecards.org/cgi-bin/carddisp.pl?gene=DNMT1</a>       |
| CD44     | CD44 Molecule (Indian Blood Group)                          | Protein Coding | 48 | GC11P035139 | 20.63989639 | <a href="https://www.genecards.org/cgi-bin/carddisp.pl?gene=CD44">https://www.genecards.org/cgi-bin/carddisp.pl?gene=CD44</a>         |
| APOA2    | Apolipoprotein A2                                           | Protein Coding | 44 | GC01M161222 | 20.63027    | <a href="https://www.genecards.org/cgi-bin/carddisp.pl?gene=APOA2">https://www.genecards.org/cgi-bin/carddisp.pl?gene=APOA2</a>       |
| CHIT1    | Chitinase 1                                                 | Protein Coding | 44 | GC01M203181 | 20.58336639 | <a href="https://www.genecards.org/cgi-bin/carddisp.pl?gene=CHIT1">https://www.genecards.org/cgi-bin/carddisp.pl?gene=CHIT1</a>       |
| COL3A1   | Collagen Type III Alpha 1 Chain                             | Protein Coding | 47 | GC02P188974 | 20.57392311 | <a href="https://www.genecards.org/cgi-bin/carddisp.pl?gene=COL3A1">https://www.genecards.org/cgi-bin/carddisp.pl?gene=COL3A1</a>     |
| IL21     | Interleukin 21                                              | Protein Coding | 43 | GC04M122612 | 20.53334045 | <a href="https://www.genecards.org/cgi-bin/carddisp.pl?gene=IL21">https://www.genecards.org/cgi-bin/carddisp.pl?gene=IL21</a>         |
| CLU      | Clusterin                                                   | Protein Coding | 47 | GC08M027596 | 20.50471687 | <a href="https://www.genecards.org/cgi-bin/carddisp.pl?gene=CLU">https://www.genecards.org/cgi-bin/carddisp.pl?gene=CLU</a>           |
| ABCB7    | ATP Binding Cassette Subfamily B Member 7                   | Protein Coding | 44 | GC0XM075053 | 20.49568176 | <a href="https://www.genecards.org/cgi-bin/carddisp.pl?gene=ABCB7">https://www.genecards.org/cgi-bin/carddisp.pl?gene=ABCB7</a>       |
| UGT1A4   | UDP Glucuronosyltransferase Family 1 Member A4              | Protein Coding | 42 | GC02P233718 | 20.49449434 | <a href="https://www.genecards.org/cgi-bin/carddisp.pl?gene=UGT1A4">https://www.genecards.org/cgi-bin/carddisp.pl?gene=UGT1A4</a>     |
| NDUFS3   | NADH:Ubiquinone Oxidoreductase Core Subunit S3              | Protein Coding | 48 | GC11P047567 | 20.49392509 | <a href="https://www.genecards.org/cgi-bin/carddisp.pl?gene=NDUFS3">https://www.genecards.org/cgi-bin/carddisp.pl?gene=NDUFS3</a>     |
| GHR      | Growth Hormone Receptor                                     | Protein Coding | 47 | GC05P042429 | 20.44636154 | <a href="https://www.genecards.org/cgi-bin/carddisp.pl?gene=GHR">https://www.genecards.org/cgi-bin/carddisp.pl?gene=GHR</a>           |
| MYD88    | MYD88 Innate Immune Signal Transduction Adaptor             | Protein Coding | 50 | GC03P038139 | 20.36114693 | <a href="https://www.genecards.org/cgi-bin/carddisp.pl?gene=MYD88">https://www.genecards.org/cgi-bin/carddisp.pl?gene=MYD88</a>       |
| MIR182   | MicroRNA 182                                                | RNA Gene       | 20 | GC07M129770 | 20.32253456 | <a href="https://www.genecards.org/cgi-bin/carddisp.pl?gene=MIR182">https://www.genecards.org/cgi-bin/carddisp.pl?gene=MIR182</a>     |
| SLC10A1  | Solute Carrier Family 10 Member 1                           | Protein Coding | 45 | GC14M069775 | 20.31093025 | <a href="https://www.genecards.org/cgi-bin/carddisp.pl?gene=SLC10A1">https://www.genecards.org/cgi-bin/carddisp.pl?gene=SLC10A1</a>   |
| COPA     | COPI Coat Complex Subunit Alpha                             | Protein Coding | 43 | GC01M160288 | 20.20817757 | <a href="https://www.genecards.org/cgi-bin/carddisp.pl?gene=COPA">https://www.genecards.org/cgi-bin/carddisp.pl?gene=COPA</a>         |
| UQCRB    | Ubiquinol-Cytochrome C Reductase Binding Protein            | Protein Coding | 44 | GC08M096225 | 20.19953156 | <a href="https://www.genecards.org/cgi-bin/carddisp.pl?gene=UQCRB">https://www.genecards.org/cgi-bin/carddisp.pl?gene=UQCRB</a>       |
| SCARB1   | Scavenger Receptor Class B Member 1                         | Protein Coding | 46 | GC12M124776 | 20.18565941 | <a href="https://www.genecards.org/cgi-bin/carddisp.pl?gene=SCARB1">https://www.genecards.org/cgi-bin/carddisp.pl?gene=SCARB1</a>     |
| PC       | Pyruvate Carboxylase                                        | Protein Coding | 48 | GC11M066848 | 20.17343903 | <a href="https://www.genecards.org/cgi-bin/carddisp.pl?gene=PC">https://www.genecards.org/cgi-bin/carddisp.pl?gene=PC</a>             |
| PPARD    | Peroxisome Proliferator Activated Receptor Delta            | Protein Coding | 48 | GC06P055324 | 20.14023972 | <a href="https://www.genecards.org/cgi-bin/carddisp.pl?gene=PPARD">https://www.genecards.org/cgi-bin/carddisp.pl?gene=PPARD</a>       |
| LOX      | Lysyl Oxidase                                               | Protein Coding | 45 | GC05M122063 | 20.06209946 | <a href="https://www.genecards.org/cgi-bin/carddisp.pl?gene=LOX">https://www.genecards.org/cgi-bin/carddisp.pl?gene=LOX</a>           |
| NGF      | Nerve Growth Factor                                         | Protein Coding | 51 | GC01M115285 | 20.05589676 | <a href="https://www.genecards.org/cgi-bin/carddisp.pl?gene=NGF">https://www.genecards.org/cgi-bin/carddisp.pl?gene=NGF</a>           |
| PLA2G4A  | Phospholipase A2 Group IVA                                  | Protein Coding | 50 | GC01P186798 | 20.0489502  | <a href="https://www.genecards.org/cgi-bin/carddisp.pl?gene=PLA2G4A">https://www.genecards.org/cgi-bin/carddisp.pl?gene=PLA2G4A</a>   |
| CDH2     | Cadherin 2                                                  | Protein Coding | 53 | GC18M027950 | 19.97754669 | <a href="https://www.genecards.org/cgi-bin/carddisp.pl?gene=CDH2">https://www.genecards.org/cgi-bin/carddisp.pl?gene=CDH2</a>         |
| MIRLET7E | MicroRNA Let-7e                                             | RNA Gene       | 20 | GC19P051718 | 19.92986679 | <a href="https://www.genecards.org/cgi-bin/carddisp.pl?gene=MIRLET7E">https://www.genecards.org/cgi-bin/carddisp.pl?gene=MIRLET7E</a> |
| IL1R1    | Interleukin 1 Receptor Type 1                               | Protein Coding | 46 | GC02P102136 | 19.91479301 | <a href="https://www.genecards.org/cgi-bin/carddisp.pl?gene=IL1R1">https://www.genecards.org/cgi-bin/carddisp.pl?gene=IL1R1</a>       |
| IGFBP1   | Insulin Like Growth Factor Binding                          | Protein Coding | 44 | GC07P046838 | 19.88154602 | <a href="https://www.genecards.org/cgi-bin/carddisp.pl?gene=IGFBP1">https://www.genecards.org/cgi-bin/carddisp.pl?gene=IGFBP1</a>     |
| UGT1A10  | UDP Glucuronosyltransferase Family 1 Member A10             | Protein Coding | 41 | GC02P233636 | 19.87574959 | <a href="https://www.genecards.org/cgi-bin/carddisp.pl?gene=UGT1A10">https://www.genecards.org/cgi-bin/carddisp.pl?gene=UGT1A10</a>   |
| CYP4A11  | Cytochrome P450 Family 4 Subfamily A Member 11              | Protein Coding | 44 | GC01M046929 | 19.8310051  | <a href="https://www.genecards.org/cgi-bin/carddisp.pl?gene=CYP4A11">https://www.genecards.org/cgi-bin/carddisp.pl?gene=CYP4A11</a>   |
| MIR151A  | MicroRNA 151a                                               | RNA Gene       | 18 | GC08M140733 | 19.82871246 | <a href="https://www.genecards.org/cgi-bin/carddisp.pl?gene=MIR151A">https://www.genecards.org/cgi-bin/carddisp.pl?gene=MIR151A</a>   |
| TIMP2    | TIMP Metalloproteinase Inhibitor 2                          | Protein Coding | 44 | GC17M078852 | 19.76366043 | <a href="https://www.genecards.org/cgi-bin/carddisp.pl?gene=TIMP2">https://www.genecards.org/cgi-bin/carddisp.pl?gene=TIMP2</a>       |
| PP1G     | Peptidylprolyl Isomerase G                                  | Protein Coding | 43 | GC02P169584 | 19.74473572 | <a href="https://www.genecards.org/cgi-bin/carddisp.pl?gene=PP1G">https://www.genecards.org/cgi-bin/carddisp.pl?gene=PP1G</a>         |
| GHI      | Growth Hormone 1                                            | Protein Coding | 44 | GC17M063917 | 19.72757721 | <a href="https://www.genecards.org/cgi-bin/carddisp.pl?gene=GHI">https://www.genecards.org/cgi-bin/carddisp.pl?gene=GHI</a>           |
| ACSL3    | Acyl-CoA Synthetase Long Chain Family Member 3              | Protein Coding | 41 | GC02P222860 | 19.67117882 | <a href="https://www.genecards.org/cgi-bin/carddisp.pl?gene=ACSL3">https://www.genecards.org/cgi-bin/carddisp.pl?gene=ACSL3</a>       |
| SLC6A3   | Solute Carrier Family 6 Member 3                            | Protein Coding | 50 | GC05M001392 | 19.65219879 | <a href="https://www.genecards.org/cgi-bin/carddisp.pl?gene=SLC6A3">https://www.genecards.org/cgi-bin/carddisp.pl?gene=SLC6A3</a>     |
| CDK4     | Cyclin Dependent Kinase 4                                   | Protein Coding | 54 | GC12M057743 | 19.62770844 | <a href="https://www.genecards.org/cgi-bin/carddisp.pl?gene=CDK4">https://www.genecards.org/cgi-bin/carddisp.pl?gene=CDK4</a>         |
| CRYAA    | Crystallin Alpha A                                          | Protein Coding | 45 | GC21P043169 | 19.57661819 | <a href="https://www.genecards.org/cgi-bin/carddisp.pl?gene=CRYAA">https://www.genecards.org/cgi-bin/carddisp.pl?gene=CRYAA</a>       |
| ERBB4    | Erb-B2 Receptor Tyrosine Kinase 4                           | Protein Coding | 55 | GC02M211375 | 19.56996918 | <a href="https://www.genecards.org/cgi-bin/carddisp.pl?gene=ERBB4">https://www.genecards.org/cgi-bin/carddisp.pl?gene=ERBB4</a>       |
| TNFSF10  | TNF Superfamily Member 10                                   | Protein Coding | 47 | GC03M172505 | 19.53599993 | <a href="https://www.genecards.org/cgi-bin/carddisp.pl?gene=TNFSF10">https://www.genecards.org/cgi-bin/carddisp.pl?gene=TNFSF10</a>   |

|              |                                                                        |                   |    |             |             |                                                                                                                                               |
|--------------|------------------------------------------------------------------------|-------------------|----|-------------|-------------|-----------------------------------------------------------------------------------------------------------------------------------------------|
| EPHX1        | Epoxide Hydrolase 1                                                    | Protein Coding    | 48 | GC01P225810 | 19.52431297 | <a href="https://www.genecards.org/cgi-bin/carddisp.pl?gene=EPHX1">https://www.genecards.org/cgi-bin/carddisp.pl?gene=EPHX1</a>               |
| UGT1A3       | UDP Glucuronosyltransferase Family 1 Member A3                         | Protein Coding    | 39 | GC02P233729 | 19.51120567 | <a href="https://www.genecards.org/cgi-bin/carddisp.pl?gene=UGT1A3">https://www.genecards.org/cgi-bin/carddisp.pl?gene=UGT1A3</a>             |
| IL18BP       | Interleukin 18 Binding Protein                                         | Protein Coding    | 40 | GC11P071998 | 19.50037193 | <a href="https://www.genecards.org/cgi-bin/carddisp.pl?gene=IL18BP">https://www.genecards.org/cgi-bin/carddisp.pl?gene=IL18BP</a>             |
| HSPA5        | Heat Shock Protein Family A (Hsp70) Member 5                           | Protein Coding    | 48 | GC09M125234 | 19.48897552 | <a href="https://www.genecards.org/cgi-bin/carddisp.pl?gene=HSPA5">https://www.genecards.org/cgi-bin/carddisp.pl?gene=HSPA5</a>               |
| SLC6A4       | Solute Carrier Family 6 Member 4                                       | Protein Coding    | 48 | GC17M030194 | 19.44141388 | <a href="https://www.genecards.org/cgi-bin/carddisp.pl?gene=SLC6A4">https://www.genecards.org/cgi-bin/carddisp.pl?gene=SLC6A4</a>             |
| SIRT3        | Sirtuin 3                                                              | Protein Coding    | 48 | GC11M000215 | 19.38682938 | <a href="https://www.genecards.org/cgi-bin/carddisp.pl?gene=SIRT3">https://www.genecards.org/cgi-bin/carddisp.pl?gene=SIRT3</a>               |
| NPY          | Neuropeptide Y                                                         | Protein Coding    | 46 | GC07P024290 | 19.33066177 | <a href="https://www.genecards.org/cgi-bin/carddisp.pl?gene=NPY">https://www.genecards.org/cgi-bin/carddisp.pl?gene=NPY</a>                   |
| SPARC        | Secreted Protein Acidic And Cysteine Rich                              | Protein Coding    | 51 | GC05M151661 | 19.32937622 | <a href="https://www.genecards.org/cgi-bin/carddisp.pl?gene=SPARC">https://www.genecards.org/cgi-bin/carddisp.pl?gene=SPARC</a>               |
| MIR378A      | MicroRNA 378a                                                          | RNA Gene          | 19 | GC05P149732 | 19.31931877 | <a href="https://www.genecards.org/cgi-bin/carddisp.pl?gene=MIR378A">https://www.genecards.org/cgi-bin/carddisp.pl?gene=MIR378A</a>           |
| ADH1B        | Alcohol Dehydrogenase 1B (Class I), Beta Polypeptide                   | Protein Coding    | 44 | GC04M099304 | 19.28111203 | <a href="https://www.genecards.org/cgi-bin/carddisp.pl?gene=ADH1B">https://www.genecards.org/cgi-bin/carddisp.pl?gene=ADH1B</a>               |
| KHK          | Ketohexokinase                                                         | Protein Coding    | 45 | GC02P027086 | 19.27867317 | <a href="https://www.genecards.org/cgi-bin/carddisp.pl?gene=KHK">https://www.genecards.org/cgi-bin/carddisp.pl?gene=KHK</a>                   |
| CEL          | Carboxyl Ester Lipase                                                  | Protein Coding    | 47 | GC09P133061 | 19.21060181 | <a href="https://www.genecards.org/cgi-bin/carddisp.pl?gene=CEL">https://www.genecards.org/cgi-bin/carddisp.pl?gene=CEL</a>                   |
| MIR192       | MicroRNA 192                                                           | RNA Gene          | 22 | GC11M064891 | 19.18599129 | <a href="https://www.genecards.org/cgi-bin/carddisp.pl?gene=MIR192">https://www.genecards.org/cgi-bin/carddisp.pl?gene=MIR192</a>             |
| GNMT         | Glycine N-Methyltransferase                                            | Protein Coding    | 46 | GC06P042960 | 19.16465569 | <a href="https://www.genecards.org/cgi-bin/carddisp.pl?gene=GNMT">https://www.genecards.org/cgi-bin/carddisp.pl?gene=GNMT</a>                 |
| MIR429       | MicroRNA 429                                                           | RNA Gene          | 19 | GC01P002023 | 19.1120357  | <a href="https://www.genecards.org/cgi-bin/carddisp.pl?gene=MIR429">https://www.genecards.org/cgi-bin/carddisp.pl?gene=MIR429</a>             |
| UCP3         | Uncoupling Protein 3                                                   | Protein Coding    | 44 | GC11M074000 | 19.11037827 | <a href="https://www.genecards.org/cgi-bin/carddisp.pl?gene=UCP3">https://www.genecards.org/cgi-bin/carddisp.pl?gene=UCP3</a>                 |
| MEG3         | Maternally Expressed 3                                                 | RNA Gene          | 30 | GC14P106296 | 19.07384491 | <a href="https://www.genecards.org/cgi-bin/carddisp.pl?gene=MEG3">https://www.genecards.org/cgi-bin/carddisp.pl?gene=MEG3</a>                 |
| CRAT         | Carnitine O-Acetyltransferase                                          | Protein Coding    | 45 | GC09M129094 | 18.94405556 | <a href="https://www.genecards.org/cgi-bin/carddisp.pl?gene=CRAT">https://www.genecards.org/cgi-bin/carddisp.pl?gene=CRAT</a>                 |
| NDUFA13      | NADH:Ubiquinone Oxidoreductase Subunit A13                             | Protein Coding    | 45 | GC19P019515 | 18.90237999 | <a href="https://www.genecards.org/cgi-bin/carddisp.pl?gene=NDUFA13">https://www.genecards.org/cgi-bin/carddisp.pl?gene=NDUFA13</a>           |
| CYP1B1       | Cytochrome P450 Family 1 Subfamily B Member 1                          | Protein Coding    | 49 | GC02M038066 | 18.88570023 | <a href="https://www.genecards.org/cgi-bin/carddisp.pl?gene=CYP1B1">https://www.genecards.org/cgi-bin/carddisp.pl?gene=CYP1B1</a>             |
| NEU1         | Neuraminidase 1                                                        | Protein Coding    | 45 | GC06M031857 | 18.8324219  | <a href="https://www.genecards.org/cgi-bin/carddisp.pl?gene=NEU1">https://www.genecards.org/cgi-bin/carddisp.pl?gene=NEU1</a>                 |
| IL15         | Interleukin 15                                                         | Protein Coding    | 41 | GC04P141636 | 18.78727341 | <a href="https://www.genecards.org/cgi-bin/carddisp.pl?gene=IL15">https://www.genecards.org/cgi-bin/carddisp.pl?gene=IL15</a>                 |
| NAT2         | N-Acetyltransferase 2                                                  | Protein Coding    | 44 | GC08P018391 | 18.71180725 | <a href="https://www.genecards.org/cgi-bin/carddisp.pl?gene=NAT2">https://www.genecards.org/cgi-bin/carddisp.pl?gene=NAT2</a>                 |
| FNDC5        | Fibronectin Type III Domain Containing 5                               | Protein Coding    | 34 | GC01M032866 | 18.67414093 | <a href="https://www.genecards.org/cgi-bin/carddisp.pl?gene=FNDC5">https://www.genecards.org/cgi-bin/carddisp.pl?gene=FNDC5</a>               |
| NDUFA1       | NADH:Ubiquinone Oxidoreductase Subunit A1                              | Protein Coding    | 45 | GC0XP119871 | 18.66812134 | <a href="https://www.genecards.org/cgi-bin/carddisp.pl?gene=NDUFA1">https://www.genecards.org/cgi-bin/carddisp.pl?gene=NDUFA1</a>             |
| GLUD1        | Glutamate Dehydrogenase 1                                              | Protein Coding    | 50 | GC10M087050 | 18.65625572 | <a href="https://www.genecards.org/cgi-bin/carddisp.pl?gene=GLUD1">https://www.genecards.org/cgi-bin/carddisp.pl?gene=GLUD1</a>               |
| CASP9        | Caspase 9                                                              | Protein Coding    | 48 | GC01M015491 | 18.55427933 | <a href="https://www.genecards.org/cgi-bin/carddisp.pl?gene=CASP9">https://www.genecards.org/cgi-bin/carddisp.pl?gene=CASP9</a>               |
| GC           | GC Vitamin D Binding Protein                                           | Protein Coding    | 44 | GC04M071741 | 18.5395565  | <a href="https://www.genecards.org/cgi-bin/carddisp.pl?gene=GC">https://www.genecards.org/cgi-bin/carddisp.pl?gene=GC</a>                     |
| PRKAA2       | Protein Kinase AMP-Activated Catalytic Subunit Alpha 2                 | Protein Coding    | 51 | GC01P056645 | 18.48451614 | <a href="https://www.genecards.org/cgi-bin/carddisp.pl?gene=PRKAA2">https://www.genecards.org/cgi-bin/carddisp.pl?gene=PRKAA2</a>             |
| GSTT1        | Glutathione S-Transferase Theta 1                                      | Protein Coding    | 33 | GC22M100270 | 18.47049713 | <a href="https://www.genecards.org/cgi-bin/carddisp.pl?gene=GSTT1">https://www.genecards.org/cgi-bin/carddisp.pl?gene=GSTT1</a>               |
| EIF4G1       | Eukaryotic Translation Initiation Factor 4 Gamma 1                     | Protein Coding    | 47 | GC03P184314 | 18.41026306 | <a href="https://www.genecards.org/cgi-bin/carddisp.pl?gene=EIF4G1">https://www.genecards.org/cgi-bin/carddisp.pl?gene=EIF4G1</a>             |
| CYP2B6       | Cytochrome P450 Family 2 Subfamily B Member 6                          | Protein Coding    | 48 | GC19P040991 | 18.40908432 | <a href="https://www.genecards.org/cgi-bin/carddisp.pl?gene=CYP2B6">https://www.genecards.org/cgi-bin/carddisp.pl?gene=CYP2B6</a>             |
| EPRS1        | Glutamyl-Prolyl-TRNA Synthetase 1                                      | Protein Coding    | 37 | GC01M219969 | 18.34876251 | <a href="https://www.genecards.org/cgi-bin/carddisp.pl?gene=EPRS1">https://www.genecards.org/cgi-bin/carddisp.pl?gene=EPRS1</a>               |
| CHUK         | Component Of Inhibitor Of Nuclear Factor Kappa B Kinase Complex        | Protein Coding    | 52 | GC10M100188 | 18.32289314 | <a href="https://www.genecards.org/cgi-bin/carddisp.pl?gene=CHUK">https://www.genecards.org/cgi-bin/carddisp.pl?gene=CHUK</a>                 |
| SERPINF2     | Serpin Family F Member 2                                               | Protein Coding    | 44 | GC17P001742 | 18.27783012 | <a href="https://www.genecards.org/cgi-bin/carddisp.pl?gene=SERPINF2">https://www.genecards.org/cgi-bin/carddisp.pl?gene=SERPINF2</a>         |
| SERPINA6     | Serpin Family A Member 6                                               | Protein Coding    | 44 | GC14M095823 | 18.27275848 | <a href="https://www.genecards.org/cgi-bin/carddisp.pl?gene=SERPINA6">https://www.genecards.org/cgi-bin/carddisp.pl?gene=SERPINA6</a>         |
| PARP1        | Poly(ADP-Ribose) Polymerase 1                                          | Protein Coding    | 50 | GC01M226360 | 18.22401428 | <a href="https://www.genecards.org/cgi-bin/carddisp.pl?gene=PARP1">https://www.genecards.org/cgi-bin/carddisp.pl?gene=PARP1</a>               |
| MIR30D       | MicroRNA 30d                                                           | RNA Gene          | 17 | GC08M134804 | 18.22224998 | <a href="https://www.genecards.org/cgi-bin/carddisp.pl?gene=MIR30D">https://www.genecards.org/cgi-bin/carddisp.pl?gene=MIR30D</a>             |
| AGER         | Advanced Glycosylation End-Product Specific Receptor                   | Protein Coding    | 45 | GC06M032180 | 18.18928909 | <a href="https://www.genecards.org/cgi-bin/carddisp.pl?gene=AGER">https://www.genecards.org/cgi-bin/carddisp.pl?gene=AGER</a>                 |
| MIR483       | MicroRNA 483                                                           | RNA Gene          | 18 | GC11M002219 | 18.14042473 | <a href="https://www.genecards.org/cgi-bin/carddisp.pl?gene=MIR483">https://www.genecards.org/cgi-bin/carddisp.pl?gene=MIR483</a>             |
| DKK1         | Dickkopf WNT Signaling Pathway Inhibitor 1                             | Protein Coding    | 45 | GC10P052314 | 18.08655548 | <a href="https://www.genecards.org/cgi-bin/carddisp.pl?gene=DKK1">https://www.genecards.org/cgi-bin/carddisp.pl?gene=DKK1</a>                 |
| SI00A9       | SI00 Calcium Binding Protein A9                                        | Protein Coding    | 43 | GC01P153357 | 18.07329178 | <a href="https://www.genecards.org/cgi-bin/carddisp.pl?gene=SI00A9">https://www.genecards.org/cgi-bin/carddisp.pl?gene=SI00A9</a>             |
| SDCCAG8      | SHH Signaling And Ciliogenesis Regulator SDCCAG8                       | Protein Coding    | 43 | GC01P243255 | 18.03864479 | <a href="https://www.genecards.org/cgi-bin/carddisp.pl?gene=SDCCAG8">https://www.genecards.org/cgi-bin/carddisp.pl?gene=SDCCAG8</a>           |
| EZH2         | Enhancer Of Zeste 2 Polycomb Repressive Complex 2 Subunit              | Protein Coding    | 54 | GC07M148807 | 17.97975922 | <a href="https://www.genecards.org/cgi-bin/carddisp.pl?gene=EZH2">https://www.genecards.org/cgi-bin/carddisp.pl?gene=EZH2</a>                 |
| LRPPRC       | Leucine Rich Pentatricopeptide Repeat Containing                       | Protein Coding    | 43 | GC02M043850 | 17.92406082 | <a href="https://www.genecards.org/cgi-bin/carddisp.pl?gene=LRPPRC">https://www.genecards.org/cgi-bin/carddisp.pl?gene=LRPPRC</a>             |
| MIR205       | MicroRNA 205                                                           | RNA Gene          | 20 | GC01P209493 | 17.92008209 | <a href="https://www.genecards.org/cgi-bin/carddisp.pl?gene=MIR205">https://www.genecards.org/cgi-bin/carddisp.pl?gene=MIR205</a>             |
| CCL3         | C-C Motif Chemokine Ligand 3                                           | Protein Coding    | 40 | GC17M036088 | 17.90954018 | <a href="https://www.genecards.org/cgi-bin/carddisp.pl?gene=CCL3">https://www.genecards.org/cgi-bin/carddisp.pl?gene=CCL3</a>                 |
| SP1          | Sp1 Transcription Factor                                               | Protein Coding    | 45 | GC12P053380 | 17.85421753 | <a href="https://www.genecards.org/cgi-bin/carddisp.pl?gene=SP1">https://www.genecards.org/cgi-bin/carddisp.pl?gene=SP1</a>                   |
| CEBPB        | CCAAT Enhancer Binding Protein Beta                                    | Protein Coding    | 44 | GC20P050190 | 17.85057068 | <a href="https://www.genecards.org/cgi-bin/carddisp.pl?gene=CEBPB">https://www.genecards.org/cgi-bin/carddisp.pl?gene=CEBPB</a>               |
| SOST         | Sclerostin                                                             | Protein Coding    | 44 | GC17M043753 | 17.82912827 | <a href="https://www.genecards.org/cgi-bin/carddisp.pl?gene=SOST">https://www.genecards.org/cgi-bin/carddisp.pl?gene=SOST</a>                 |
| CSF1         | Colony Stimulating Factor 1                                            | Protein Coding    | 44 | GC01P109911 | 17.75559616 | <a href="https://www.genecards.org/cgi-bin/carddisp.pl?gene=CSF1">https://www.genecards.org/cgi-bin/carddisp.pl?gene=CSF1</a>                 |
| NDUFS8       | NADH:Ubiquinone Oxidoreductase Core Subunit S8                         | Protein Coding    | 46 | GC11P068030 | 17.73937988 | <a href="https://www.genecards.org/cgi-bin/carddisp.pl?gene=NDUFS8">https://www.genecards.org/cgi-bin/carddisp.pl?gene=NDUFS8</a>             |
| FGFR4        | Fibroblast Growth Factor Receptor 4                                    | Protein Coding    | 52 | GC05P177086 | 17.73563576 | <a href="https://www.genecards.org/cgi-bin/carddisp.pl?gene=FGFR4">https://www.genecards.org/cgi-bin/carddisp.pl?gene=FGFR4</a>               |
| DRD2         | Dopamine Receptor D2                                                   | Protein Coding    | 51 | GC11M113409 | 17.66122055 | <a href="https://www.genecards.org/cgi-bin/carddisp.pl?gene=DRD2">https://www.genecards.org/cgi-bin/carddisp.pl?gene=DRD2</a>                 |
| TMPPRS6      | Transmembrane Serine Protease 6                                        | Protein Coding    | 44 | GC22M037066 | 17.62794876 | <a href="https://www.genecards.org/cgi-bin/carddisp.pl?gene=TMPPRS6">https://www.genecards.org/cgi-bin/carddisp.pl?gene=TMPPRS6</a>           |
| RAC1         | Rac Family Small GTPase 1                                              | Protein Coding    | 50 | GC07P006377 | 17.59141159 | <a href="https://www.genecards.org/cgi-bin/carddisp.pl?gene=RAC1">https://www.genecards.org/cgi-bin/carddisp.pl?gene=RAC1</a>                 |
| HSD11B1      | Hydroxysteroid 11-Beta Dehydrogenase 1                                 | Protein Coding    | 50 | GC02P209686 | 17.57976151 | <a href="https://www.genecards.org/cgi-bin/carddisp.pl?gene=HSD11B1">https://www.genecards.org/cgi-bin/carddisp.pl?gene=HSD11B1</a>           |
| RPS27A       | Ribosomal Protein S27a                                                 | Protein Coding    | 44 | GC02P055231 | 17.52258873 | <a href="https://www.genecards.org/cgi-bin/carddisp.pl?gene=RPS27A">https://www.genecards.org/cgi-bin/carddisp.pl?gene=RPS27A</a>             |
| UCP1         | Uncoupling Protein 1                                                   | Protein Coding    | 45 | GC04M140559 | 17.26399612 | <a href="https://www.genecards.org/cgi-bin/carddisp.pl?gene=UCP1">https://www.genecards.org/cgi-bin/carddisp.pl?gene=UCP1</a>                 |
| PIK3CD       | Phosphatidylinositol-4,5-Bisphosphate 3-Kinase Catalytic Subunit Delta | Protein Coding    | 54 | GC01P009629 | 17.26249123 | <a href="https://www.genecards.org/cgi-bin/carddisp.pl?gene=PIK3CD">https://www.genecards.org/cgi-bin/carddisp.pl?gene=PIK3CD</a>             |
| CCR1         | C-C Motif Chemokine Receptor 1                                         | Protein Coding    | 45 | GC03M046218 | 17.22773552 | <a href="https://www.genecards.org/cgi-bin/carddisp.pl?gene=CCR1">https://www.genecards.org/cgi-bin/carddisp.pl?gene=CCR1</a>                 |
| NPC1L1       | NPC1 Like Intracellular Cholesterol Transporter 1                      | Protein Coding    | 44 | GC07M044512 | 17.19471741 | <a href="https://www.genecards.org/cgi-bin/carddisp.pl?gene=NPC1L1">https://www.genecards.org/cgi-bin/carddisp.pl?gene=NPC1L1</a>             |
| MIR27B       | MicroRNA 27b                                                           | RNA Gene          | 20 | GC09P095097 | 17.17765427 | <a href="https://www.genecards.org/cgi-bin/carddisp.pl?gene=MIR27B">https://www.genecards.org/cgi-bin/carddisp.pl?gene=MIR27B</a>             |
| NR0B2        | Nuclear Receptor Subfamily 0 Group B Member 2                          | Protein Coding    | 44 | GC01M026922 | 17.08059311 | <a href="https://www.genecards.org/cgi-bin/carddisp.pl?gene=NR0B2">https://www.genecards.org/cgi-bin/carddisp.pl?gene=NR0B2</a>               |
| IFNL3        | Interferon Lambda 3                                                    | Protein Coding    | 35 | GC19M039243 | 17.02130127 | <a href="https://www.genecards.org/cgi-bin/carddisp.pl?gene=IFNL3">https://www.genecards.org/cgi-bin/carddisp.pl?gene=IFNL3</a>               |
| LOC110806263 | TERT 5' Regulatory Region                                              | Biological Region | 2  | GC05P001294 | 16.94519043 | <a href="https://www.genecards.org/cgi-bin/carddisp.pl?gene=LOC110806263">https://www.genecards.org/cgi-bin/carddisp.pl?gene=LOC110806263</a> |
| MIR214       | MicroRNA 214                                                           | RNA Gene          | 20 | GC01M172234 | 16.94231033 | <a href="https://www.genecards.org/cgi-bin/carddisp.pl?gene=MIR214">https://www.genecards.org/cgi-bin/carddisp.pl?gene=MIR214</a>             |
| NR1I3        | Nuclear Receptor Subfamily 1 Group 1 Member 3                          | Protein Coding    | 45 | GC01M161229 | 16.8729744  | <a href="https://www.genecards.org/cgi-bin/carddisp.pl?gene=NR1I3">https://www.genecards.org/cgi-bin/carddisp.pl?gene=NR1I3</a>               |
| AHR          | Aryl Hydrocarbon Receptor                                              | Protein Coding    | 49 | GC07P016916 | 16.86351013 | <a href="https://www.genecards.org/cgi-bin/carddisp.pl?gene=AHR">https://www.genecards.org/cgi-bin/carddisp.pl?gene=AHR</a>                   |
| KL           | Klotho                                                                 | Protein Coding    | 46 | GC13P033016 | 16.86110878 | <a href="https://www.genecards.org/cgi-bin/carddisp.pl?gene=KL">https://www.genecards.org/cgi-bin/carddisp.pl?gene=KL</a>                     |
| PRL          | Prolactin                                                              | Protein Coding    | 44 | GC06M022287 | 16.85406494 | <a href="https://www.genecards.org/cgi-bin/carddisp.pl?gene=PRL">https://www.genecards.org/cgi-bin/carddisp.pl?gene=PRL</a>                   |
| GSR          | Glutathione-Disulfide Reductase                                        | Protein Coding    | 50 | GC08M030678 | 16.76444817 | <a href="https://www.genecards.org/cgi-bin/carddisp.pl?gene=GSR">https://www.genecards.org/cgi-bin/carddisp.pl?gene=GSR</a>                   |
| SUMF1        | Sulfatase Modifying Factor 1                                           | Protein Coding    | 43 | GC03M003700 | 16.68222046 | <a href="https://www.genecards.org/cgi-bin/carddisp.pl?gene=SUMF1">https://www.genecards.org/cgi-bin/carddisp.pl?gene=SUMF1</a>               |
| SERPINH1     | Serpin Family H Member 1                                               | Protein Coding    | 46 | GC11P075562 | 16.63241386 | <a href="https://www.genecards.org/cgi-bin/carddisp.pl?gene=SERPINH1">https://www.genecards.org/cgi-bin/carddisp.pl?gene=SERPINH1</a>         |
| NDUFA6       | NADH:Ubiquinone Oxidoreductase Subunit A6                              | Protein Coding    | 45 | GC22M042085 | 16.63097191 | <a href="https://www.genecards.org/cgi-bin/carddisp.pl?gene=NDUFA6">https://www.genecards.org/cgi-bin/carddisp.pl?gene=NDUFA6</a>             |
| ABCC3        | ATP Binding Cassette Subfamily C Member 3                              | Protein Coding    | 47 | GC17P050634 | 16.56124687 | <a href="https://www.genecards.org/cgi-bin/carddisp.pl?gene=ABCC3">https://www.genecards.org/cgi-bin/carddisp.pl?gene=ABCC3</a>               |
| LTBP3        | Latent Transforming Growth Factor Beta Binding Protein 3               | Protein Coding    | 42 | GC11M065538 | 16.55593491 | <a href="https://www.genecards.org/cgi-bin/carddisp.pl?gene=LTBP3">https://www.genecards.org/cgi-bin/carddisp.pl?gene=LTBP3</a>               |
| HTR2A        | 5-Hydroxytryptamine Receptor 2A                                        | Protein Coding    | 48 | GC13M046831 | 16.53968048 | <a href="https://www.genecards.org/cgi-bin/carddisp.pl?gene=HTR2A">https://www.genecards.org/cgi-bin/carddisp.pl?gene=HTR2A</a>               |
| GPX1         | Glutathione Peroxidase 1                                               | Protein Coding    | 48 | GC03M049486 | 16.5343132  | <a href="https://www.genecards.org/cgi-bin/carddisp.pl?gene=GPX1">https://www.genecards.org/cgi-bin/carddisp.pl?gene=GPX1</a>                 |
| AKT3         | AKT Serine/Threonine Kinase 3                                          | Protein Coding    | 54 | GC01M243488 | 16.53372192 | <a href="https://www.genecards.org/cgi-bin/carddisp.pl?gene=AKT3">https://www.genecards.org/cgi-bin/carddisp.pl?gene=AKT3</a>                 |
| BLVRA        | Biliverdin Reductase A                                                 | Protein Coding    | 45 | GC07P043758 | 16.52719688 | <a href="https://www.genecards.org/cgi-bin/carddisp.pl?gene=BLVRA">https://www.genecards.org/cgi-bin/carddisp.pl?gene=BLVRA</a>               |
| DNMT3A       | DNA Methyltransferase 3 Alpha                                          | Protein Coding    | 52 | GC02M025228 | 16.47757721 | <a href="https://www.genecards.org/cgi-bin/carddisp.pl?gene=DNMT3A">https://www.genecards.org/cgi-bin/carddisp.pl?gene=DNMT3A</a>             |
| NDUFA10      | NADH:Ubiquinone Oxidoreductase Subunit A10                             | Protein Coding    | 45 | GC02M239893 | 16.45397758 | <a href="https://www.genecards.org/cgi-bin/carddisp.pl?gene=NDUFA10">https://www.genecards.org/cgi-bin/carddisp.pl?gene=NDUFA10</a>           |

|          |                                                                     |                |    |              |             |                                                                                                                                       |
|----------|---------------------------------------------------------------------|----------------|----|--------------|-------------|---------------------------------------------------------------------------------------------------------------------------------------|
| MIR9-1   | MicroRNA 9-1                                                        | RNA Gene       | 20 | GC01M156420  | 16.45192528 | <a href="https://www.genecards.org/cgi-bin/carddisp.pl?gene=MIR9-1">https://www.genecards.org/cgi-bin/carddisp.pl?gene=MIR9-1</a>     |
| EPHX2    | Epoxide Hydrolase 2                                                 | Protein Coding | 48 | GC08P027490  | 16.41978073 | <a href="https://www.genecards.org/cgi-bin/carddisp.pl?gene=EPHX2">https://www.genecards.org/cgi-bin/carddisp.pl?gene=EPHX2</a>       |
| CD163    | CD163 Molecule                                                      | Protein Coding | 43 | GC12M007471  | 16.40397072 | <a href="https://www.genecards.org/cgi-bin/carddisp.pl?gene=CD163">https://www.genecards.org/cgi-bin/carddisp.pl?gene=CD163</a>       |
| COX4I1   | Cytochrome C Oxidase Subunit 4I1                                    | Protein Coding | 47 | GC16P085798  | 16.39952278 | <a href="https://www.genecards.org/cgi-bin/carddisp.pl?gene=COX4I1">https://www.genecards.org/cgi-bin/carddisp.pl?gene=COX4I1</a>     |
| HSP90AA1 | Heat Shock Protein 90 Alpha Family Class A Member 1                 | Protein Coding | 48 | GC14M102080  | 16.37860668 | <a href="https://www.genecards.org/cgi-bin/carddisp.pl?gene=HSP90AA1">https://www.genecards.org/cgi-bin/carddisp.pl?gene=HSP90AA1</a> |
| IRGM     | Immunity Related GTPase M                                           | Protein Coding | 38 | GC05P150846  | 16.36742401 | <a href="https://www.genecards.org/cgi-bin/carddisp.pl?gene=IRGM">https://www.genecards.org/cgi-bin/carddisp.pl?gene=IRGM</a>         |
| IRF1     | Interferon Regulatory Factor 1                                      | Protein Coding | 47 | GC05M132440  | 16.34394264 | <a href="https://www.genecards.org/cgi-bin/carddisp.pl?gene=IRF1">https://www.genecards.org/cgi-bin/carddisp.pl?gene=IRF1</a>         |
| HMG1     | High Mobility Group Box 1                                           | Protein Coding | 45 | GC13M030456  | 16.3422699  | <a href="https://www.genecards.org/cgi-bin/carddisp.pl?gene=HMG1">https://www.genecards.org/cgi-bin/carddisp.pl?gene=HMG1</a>         |
| DYSF     | Dysferlin                                                           | Protein Coding | 44 | GC02P071453  | 16.32235718 | <a href="https://www.genecards.org/cgi-bin/carddisp.pl?gene=DYSF">https://www.genecards.org/cgi-bin/carddisp.pl?gene=DYSF</a>         |
| DNASE1   | Deoxyribonuclease 1                                                 | Protein Coding | 43 | GC16P003611  | 16.29515839 | <a href="https://www.genecards.org/cgi-bin/carddisp.pl?gene=DNASE1">https://www.genecards.org/cgi-bin/carddisp.pl?gene=DNASE1</a>     |
| NDUFB8   | NADH:Ubiquinone Oxidoreductase Subunit B8                           | Protein Coding | 43 | GC10M100523  | 16.28831863 | <a href="https://www.genecards.org/cgi-bin/carddisp.pl?gene=NDUFB8">https://www.genecards.org/cgi-bin/carddisp.pl?gene=NDUFB8</a>     |
| FGB      | Fibrinogen Beta Chain                                               | Protein Coding | 47 | GC04P154572  | 16.28487778 | <a href="https://www.genecards.org/cgi-bin/carddisp.pl?gene=FGB">https://www.genecards.org/cgi-bin/carddisp.pl?gene=FGB</a>           |
| MMP13    | Matrix Metalloproteinase 13                                         | Protein Coding | 51 | GC11M102942  | 16.26388931 | <a href="https://www.genecards.org/cgi-bin/carddisp.pl?gene=MMP13">https://www.genecards.org/cgi-bin/carddisp.pl?gene=MMP13</a>       |
| CXCR3    | C-X-C Motif Chemokine Receptor 3                                    | Protein Coding | 45 | GC0XM071615  | 16.24189758 | <a href="https://www.genecards.org/cgi-bin/carddisp.pl?gene=CXCR3">https://www.genecards.org/cgi-bin/carddisp.pl?gene=CXCR3</a>       |
| FLI1     | Fli-1 Proto-Oncogene, ETS Transcription Factor                      | Protein Coding | 49 | GC11P128686  | 16.21395111 | <a href="https://www.genecards.org/cgi-bin/carddisp.pl?gene=FLI1">https://www.genecards.org/cgi-bin/carddisp.pl?gene=FLI1</a>         |
| LMBRD1   | LMBR1 Domain Containing 1                                           | Protein Coding | 39 | GC06M069675  | 16.20565033 | <a href="https://www.genecards.org/cgi-bin/carddisp.pl?gene=LMBRD1">https://www.genecards.org/cgi-bin/carddisp.pl?gene=LMBRD1</a>     |
| SERPINF1 | Serpin Family F Member 1                                            | Protein Coding | 45 | GC17P001761  | 16.18712997 | <a href="https://www.genecards.org/cgi-bin/carddisp.pl?gene=SERPINF1">https://www.genecards.org/cgi-bin/carddisp.pl?gene=SERPINF1</a> |
| NQO1     | NAD(P)H Quinone Dehydrogenase 1                                     | Protein Coding | 50 | GC16M069706  | 16.1689415  | <a href="https://www.genecards.org/cgi-bin/carddisp.pl?gene=NQO1">https://www.genecards.org/cgi-bin/carddisp.pl?gene=NQO1</a>         |
| PRKCA    | Protein Kinase C Alpha                                              | Protein Coding | 52 | GC17P066302  | 16.13891029 | <a href="https://www.genecards.org/cgi-bin/carddisp.pl?gene=PRKCA">https://www.genecards.org/cgi-bin/carddisp.pl?gene=PRKCA</a>       |
| UGT1A5   | UDP Glucuronosyltransferase Family 1 Member A5                      | Protein Coding | 34 | GC02P233712  | 16.1357193  | <a href="https://www.genecards.org/cgi-bin/carddisp.pl?gene=UGT1A5">https://www.genecards.org/cgi-bin/carddisp.pl?gene=UGT1A5</a>     |
| ANGPTL3  | Angiotensinogen Like 3                                              | Protein Coding | 46 | GC01P062597  | 16.09730911 | <a href="https://www.genecards.org/cgi-bin/carddisp.pl?gene=ANGPTL3">https://www.genecards.org/cgi-bin/carddisp.pl?gene=ANGPTL3</a>   |
| NDUFB11  | NADH:Ubiquinone Oxidoreductase Subunit B11                          | Protein Coding | 40 | GC0XM047142  | 16.08590698 | <a href="https://www.genecards.org/cgi-bin/carddisp.pl?gene=NDUFB11">https://www.genecards.org/cgi-bin/carddisp.pl?gene=NDUFB11</a>   |
| NDUFS6   | NADH:Ubiquinone Oxidoreductase Subunit S6                           | Protein Coding | 45 | GC05P001801  | 16.07621384 | <a href="https://www.genecards.org/cgi-bin/carddisp.pl?gene=NDUFS6">https://www.genecards.org/cgi-bin/carddisp.pl?gene=NDUFS6</a>     |
| BIRC5    | Baculoviral IAP Repeat Containing 5                                 | Protein Coding | 47 | GC17P078214  | 16.07241058 | <a href="https://www.genecards.org/cgi-bin/carddisp.pl?gene=BIRC5">https://www.genecards.org/cgi-bin/carddisp.pl?gene=BIRC5</a>       |
| AKR1A1   | Aldo-Keto Reductase Family 1 Member                                 | Protein Coding | 45 | GC01P045550  | 16.06908417 | <a href="https://www.genecards.org/cgi-bin/carddisp.pl?gene=AKR1A1">https://www.genecards.org/cgi-bin/carddisp.pl?gene=AKR1A1</a>     |
| MERTK    | MER Proto-Oncogene, Tyrosine Kinase                                 | Protein Coding | 51 | GC02P111898  | 16.00081635 | <a href="https://www.genecards.org/cgi-bin/carddisp.pl?gene=MERTK">https://www.genecards.org/cgi-bin/carddisp.pl?gene=MERTK</a>       |
| MAPK10   | Mitogen-Activated Protein Kinase 10                                 | Protein Coding | 52 | GC04M085990  | 15.95767784 | <a href="https://www.genecards.org/cgi-bin/carddisp.pl?gene=MAPK10">https://www.genecards.org/cgi-bin/carddisp.pl?gene=MAPK10</a>     |
| PRSS1    | Serine Protease 1                                                   | Protein Coding | 47 | GC07P145775  | 15.9276638  | <a href="https://www.genecards.org/cgi-bin/carddisp.pl?gene=PRSS1">https://www.genecards.org/cgi-bin/carddisp.pl?gene=PRSS1</a>       |
| CKK      | Cholecystokinin                                                     | Protein Coding | 43 | GC03M042274  | 15.90043545 | <a href="https://www.genecards.org/cgi-bin/carddisp.pl?gene=CKK">https://www.genecards.org/cgi-bin/carddisp.pl?gene=CKK</a>           |
| HSPG2    | Heparan Sulfate Proteoglycan 2                                      | Protein Coding | 46 | GC01M021822  | 15.88156986 | <a href="https://www.genecards.org/cgi-bin/carddisp.pl?gene=HSPG2">https://www.genecards.org/cgi-bin/carddisp.pl?gene=HSPG2</a>       |
| GDF15    | Growth Differentiation Factor 15                                    | Protein Coding | 43 | GC19P026656  | 15.87571144 | <a href="https://www.genecards.org/cgi-bin/carddisp.pl?gene=GDF15">https://www.genecards.org/cgi-bin/carddisp.pl?gene=GDF15</a>       |
| CDC42    | Cell Division Cycle 42                                              | Protein Coding | 51 | GC01P022112  | 15.85445023 | <a href="https://www.genecards.org/cgi-bin/carddisp.pl?gene=CDC42">https://www.genecards.org/cgi-bin/carddisp.pl?gene=CDC42</a>       |
| MAOA     | Monoamine Oxidase A                                                 | Protein Coding | 51 | GC0XP043654  | 15.81402779 | <a href="https://www.genecards.org/cgi-bin/carddisp.pl?gene=MAOA">https://www.genecards.org/cgi-bin/carddisp.pl?gene=MAOA</a>         |
| NDUFA12  | NADH:Ubiquinone Oxidoreductase Subunit A12                          | Protein Coding | 45 | GC12M094898  | 15.79312706 | <a href="https://www.genecards.org/cgi-bin/carddisp.pl?gene=NDUFA12">https://www.genecards.org/cgi-bin/carddisp.pl?gene=NDUFA12</a>   |
| GSS      | Glutathione Synthetase                                              | Protein Coding | 47 | GC20M034928  | 15.64771557 | <a href="https://www.genecards.org/cgi-bin/carddisp.pl?gene=GSS">https://www.genecards.org/cgi-bin/carddisp.pl?gene=GSS</a>           |
| COX6B1   | Cytochrome C Oxidase Subunit 6B1                                    | Protein Coding | 43 | GC19P040358  | 15.64626884 | <a href="https://www.genecards.org/cgi-bin/carddisp.pl?gene=COX6B1">https://www.genecards.org/cgi-bin/carddisp.pl?gene=COX6B1</a>     |
| NDUFB3   | NADH:Ubiquinone Oxidoreductase Subunit B3                           | Protein Coding | 43 | GC02P201071  | 15.64473438 | <a href="https://www.genecards.org/cgi-bin/carddisp.pl?gene=NDUFB3">https://www.genecards.org/cgi-bin/carddisp.pl?gene=NDUFB3</a>     |
| HDAC9    | Histone Deacetylase 9                                               | Protein Coding | 47 | GC07P018086  | 15.61901283 | <a href="https://www.genecards.org/cgi-bin/carddisp.pl?gene=HDAC9">https://www.genecards.org/cgi-bin/carddisp.pl?gene=HDAC9</a>       |
| ATP1A1   | ATPase Na <sup>+</sup> /K <sup>+</sup> Transporting Subunit Alpha 1 | Protein Coding | 51 | GC01P116372  | 15.59727097 | <a href="https://www.genecards.org/cgi-bin/carddisp.pl?gene=ATP1A1">https://www.genecards.org/cgi-bin/carddisp.pl?gene=ATP1A1</a>     |
| ABCG1    | ATP Binding Cassette Subfamily G Member 1                           | Protein Coding | 44 | GC21P042199  | 15.56394768 | <a href="https://www.genecards.org/cgi-bin/carddisp.pl?gene=ABCG1">https://www.genecards.org/cgi-bin/carddisp.pl?gene=ABCG1</a>       |
| GOT2     | Glutamate-Oxaloacetate Transaminase 2                               | Protein Coding | 47 | GC16M058707  | 15.5422679  | <a href="https://www.genecards.org/cgi-bin/carddisp.pl?gene=GOT2">https://www.genecards.org/cgi-bin/carddisp.pl?gene=GOT2</a>         |
| CH13L1   | Chitinase 3 Like 1                                                  | Protein Coding | 44 | GC01M203148  | 15.52296543 | <a href="https://www.genecards.org/cgi-bin/carddisp.pl?gene=CH13L1">https://www.genecards.org/cgi-bin/carddisp.pl?gene=CH13L1</a>     |
| MATR3    | Matrin 3                                                            | Protein Coding | 43 | GC05P139274  | 15.51981354 | <a href="https://www.genecards.org/cgi-bin/carddisp.pl?gene=MATR3">https://www.genecards.org/cgi-bin/carddisp.pl?gene=MATR3</a>       |
| CD55     | CD55 Molecule (Cromer Blood Group)                                  | Protein Coding | 48 | GC01P207321  | 15.50701332 | <a href="https://www.genecards.org/cgi-bin/carddisp.pl?gene=CD55">https://www.genecards.org/cgi-bin/carddisp.pl?gene=CD55</a>         |
| CCL20    | C-C Motif Chemokine Ligand 20                                       | Protein Coding | 44 | GC02P227814  | 15.50111008 | <a href="https://www.genecards.org/cgi-bin/carddisp.pl?gene=CCL20">https://www.genecards.org/cgi-bin/carddisp.pl?gene=CCL20</a>       |
| COX8A    | Cytochrome C Oxidase Subunit 8A                                     | Protein Coding | 41 | GC11P063994  | 15.4643364  | <a href="https://www.genecards.org/cgi-bin/carddisp.pl?gene=COX8A">https://www.genecards.org/cgi-bin/carddisp.pl?gene=COX8A</a>       |
| UQCRC2   | Ubiquinol-Cytochrome C Reductase Core Protein 2                     | Protein Coding | 47 | GC16P021963  | 15.43040752 | <a href="https://www.genecards.org/cgi-bin/carddisp.pl?gene=UQCRC2">https://www.genecards.org/cgi-bin/carddisp.pl?gene=UQCRC2</a>     |
| THBS1    | Thrombospondin 1                                                    | Protein Coding | 45 | GC15P039581  | 15.41858387 | <a href="https://www.genecards.org/cgi-bin/carddisp.pl?gene=THBS1">https://www.genecards.org/cgi-bin/carddisp.pl?gene=THBS1</a>       |
| ETS1     | ETS Proto-Oncogene 1, Transcription                                 | Protein Coding | 49 | GC11M128458  | 15.40030289 | <a href="https://www.genecards.org/cgi-bin/carddisp.pl?gene=ETS1">https://www.genecards.org/cgi-bin/carddisp.pl?gene=ETS1</a>         |
| PEPD     | Peptidase D                                                         | Protein Coding | 46 | GC19M033386  | 15.37115002 | <a href="https://www.genecards.org/cgi-bin/carddisp.pl?gene=PEPD">https://www.genecards.org/cgi-bin/carddisp.pl?gene=PEPD</a>         |
| ACSM2B   | Acyl-CoA Synthetase Medium Chain Family Member 2B                   | Protein Coding | 36 | GC16M020547  | 15.28150845 | <a href="https://www.genecards.org/cgi-bin/carddisp.pl?gene=ACSM2B">https://www.genecards.org/cgi-bin/carddisp.pl?gene=ACSM2B</a>     |
| EIF2AK2  | Eukaryotic Translation Initiation Factor 2 Alpha Kinase 2           | Protein Coding | 46 | GC02M037099  | 15.26604939 | <a href="https://www.genecards.org/cgi-bin/carddisp.pl?gene=EIF2AK2">https://www.genecards.org/cgi-bin/carddisp.pl?gene=EIF2AK2</a>   |
| MIR149   | MicroRNA 149                                                        | RNA Gene       | 20 | GC02P240456  | 15.20406532 | <a href="https://www.genecards.org/cgi-bin/carddisp.pl?gene=MIR149">https://www.genecards.org/cgi-bin/carddisp.pl?gene=MIR149</a>     |
| PLCB1    | Phospholipase C Beta 1                                              | Protein Coding | 49 | GC20P008061  | 15.19641972 | <a href="https://www.genecards.org/cgi-bin/carddisp.pl?gene=PLCB1">https://www.genecards.org/cgi-bin/carddisp.pl?gene=PLCB1</a>       |
| FOXO1    | Forkhead Box O1                                                     | Protein Coding | 48 | GC13M040555  | 15.14049435 | <a href="https://www.genecards.org/cgi-bin/carddisp.pl?gene=FOXO1">https://www.genecards.org/cgi-bin/carddisp.pl?gene=FOXO1</a>       |
| CA2      | Carbonic Anhydrase 2                                                | Protein Coding | 52 | GC08P085463  | 15.12652779 | <a href="https://www.genecards.org/cgi-bin/carddisp.pl?gene=CA2">https://www.genecards.org/cgi-bin/carddisp.pl?gene=CA2</a>           |
| DDX3X    | DEAD-Box Helicase 3 X-Linked                                        | Protein Coding | 48 | GC0XP041333  | 15.11061478 | <a href="https://www.genecards.org/cgi-bin/carddisp.pl?gene=DDX3X">https://www.genecards.org/cgi-bin/carddisp.pl?gene=DDX3X</a>       |
| SNAI2    | Snail Family Transcriptional Repressor 2                            | Protein Coding | 45 | GC08M048917  | 15.10995197 | <a href="https://www.genecards.org/cgi-bin/carddisp.pl?gene=SNAI2">https://www.genecards.org/cgi-bin/carddisp.pl?gene=SNAI2</a>       |
| PLIN1    | Perilipin 1                                                         | Protein Coding | 45 | GC15M089664  | 15.08190918 | <a href="https://www.genecards.org/cgi-bin/carddisp.pl?gene=PLIN1">https://www.genecards.org/cgi-bin/carddisp.pl?gene=PLIN1</a>       |
| ALOX12   | Arachidonate 12-Lipoxygenase, 12S Type                              | Protein Coding | 44 | GC17P006995  | 15.08088303 | <a href="https://www.genecards.org/cgi-bin/carddisp.pl?gene=ALOX12">https://www.genecards.org/cgi-bin/carddisp.pl?gene=ALOX12</a>     |
| FARSA    | Phenylalanyl-TRNA Synthetase Subunit Alpha                          | Protein Coding | 41 | GC19M012922  | 15.07990646 | <a href="https://www.genecards.org/cgi-bin/carddisp.pl?gene=FARSA">https://www.genecards.org/cgi-bin/carddisp.pl?gene=FARSA</a>       |
| RPS6KB1  | Ribosomal Protein S6 Kinase B1                                      | Protein Coding | 50 | GC17P059893  | 15.05170727 | <a href="https://www.genecards.org/cgi-bin/carddisp.pl?gene=RPS6KB1">https://www.genecards.org/cgi-bin/carddisp.pl?gene=RPS6KB1</a>   |
| DICER1   | Dicer 1, Ribonuclease III                                           | Protein Coding | 48 | GC14M095086  | 15.03832054 | <a href="https://www.genecards.org/cgi-bin/carddisp.pl?gene=DICER1">https://www.genecards.org/cgi-bin/carddisp.pl?gene=DICER1</a>     |
| BMPRI1A  | Bone Morphogenetic Protein Receptor Type 1A                         | Protein Coding | 51 | GC10P086756  | 15.03406662 | <a href="https://www.genecards.org/cgi-bin/carddisp.pl?gene=BMPRI1A">https://www.genecards.org/cgi-bin/carddisp.pl?gene=BMPRI1A</a>   |
| CNTNAP2  | Contactin Associated Protein 2                                      | Protein Coding | 44 | GC07P146116  | 15.01487637 | <a href="https://www.genecards.org/cgi-bin/carddisp.pl?gene=CNTNAP2">https://www.genecards.org/cgi-bin/carddisp.pl?gene=CNTNAP2</a>   |
| CPOX     | Coproporphyrinogen Oxidase                                          | Protein Coding | 44 | GC03M098576  | 14.96734905 | <a href="https://www.genecards.org/cgi-bin/carddisp.pl?gene=CPOX">https://www.genecards.org/cgi-bin/carddisp.pl?gene=CPOX</a>         |
| DNAH11   | Dynein Axonemal Heavy Chain 11                                      | Protein Coding | 42 | GC07P021543  | 14.86241722 | <a href="https://www.genecards.org/cgi-bin/carddisp.pl?gene=DNAH11">https://www.genecards.org/cgi-bin/carddisp.pl?gene=DNAH11</a>     |
| PIK3R2   | Phosphoinositide-3-Kinase Regulatory Subunit 2                      | Protein Coding | 50 | GC19P018153  | 14.8380537  | <a href="https://www.genecards.org/cgi-bin/carddisp.pl?gene=PIK3R2">https://www.genecards.org/cgi-bin/carddisp.pl?gene=PIK3R2</a>     |
| IRF8     | Interferon Regulatory Factor 8                                      | Protein Coding | 47 | GC16P085898  | 14.79246044 | <a href="https://www.genecards.org/cgi-bin/carddisp.pl?gene=IRF8">https://www.genecards.org/cgi-bin/carddisp.pl?gene=IRF8</a>         |
| CYP17A1  | Cytochrome P450 Family 17 Subfamily A Member 1                      | Protein Coding | 50 | GC10M102830  | 14.77322292 | <a href="https://www.genecards.org/cgi-bin/carddisp.pl?gene=CYP17A1">https://www.genecards.org/cgi-bin/carddisp.pl?gene=CYP17A1</a>   |
| PLAUR    | Plasminogen Activator, Urokinase                                    | Protein Coding | 45 | GC19M043646  | 14.73099422 | <a href="https://www.genecards.org/cgi-bin/carddisp.pl?gene=PLAUR">https://www.genecards.org/cgi-bin/carddisp.pl?gene=PLAUR</a>       |
| SDC1     | Syndecan 1                                                          | Protein Coding | 44 | GC02M020200  | 14.6667614  | <a href="https://www.genecards.org/cgi-bin/carddisp.pl?gene=SDC1">https://www.genecards.org/cgi-bin/carddisp.pl?gene=SDC1</a>         |
| PLTP     | Phospholipid Transfer Protein                                       | Protein Coding | 44 | GC20M045898  | 14.64484978 | <a href="https://www.genecards.org/cgi-bin/carddisp.pl?gene=PLTP">https://www.genecards.org/cgi-bin/carddisp.pl?gene=PLTP</a>         |
| POR      | Cytochrome P450 Oxidoreductase                                      | Protein Coding | 50 | GC07P075899  | 14.60950947 | <a href="https://www.genecards.org/cgi-bin/carddisp.pl?gene=POR">https://www.genecards.org/cgi-bin/carddisp.pl?gene=POR</a>           |
| ADRB3    | Adrenoreceptor Beta 3                                               | Protein Coding | 46 | GC08M037962  | 14.55301666 | <a href="https://www.genecards.org/cgi-bin/carddisp.pl?gene=ADRB3">https://www.genecards.org/cgi-bin/carddisp.pl?gene=ADRB3</a>       |
| ALAD     | Aminolevulinatase Dehydratase                                       | Protein Coding | 47 | GC09M113386  | 14.53653908 | <a href="https://www.genecards.org/cgi-bin/carddisp.pl?gene=ALAD">https://www.genecards.org/cgi-bin/carddisp.pl?gene=ALAD</a>         |
| TGM2     | Transglutaminase 2                                                  | Protein Coding | 48 | GC20M038127  | 14.51640129 | <a href="https://www.genecards.org/cgi-bin/carddisp.pl?gene=TGM2">https://www.genecards.org/cgi-bin/carddisp.pl?gene=TGM2</a>         |
| STAR     | Steroidogenic Acute Regulatory Protein                              | Protein Coding | 47 | GC08M038145  | 14.50080585 | <a href="https://www.genecards.org/cgi-bin/carddisp.pl?gene=STAR">https://www.genecards.org/cgi-bin/carddisp.pl?gene=STAR</a>         |
| SMAD7    | SMAD Family Member 7                                                | Protein Coding | 44 | GC18M048919  | 14.4142046  | <a href="https://www.genecards.org/cgi-bin/carddisp.pl?gene=SMAD7">https://www.genecards.org/cgi-bin/carddisp.pl?gene=SMAD7</a>       |
| MYH14    | Myosin Heavy Chain 14                                               | Protein Coding | 46 | GC19P050192  | 14.4097271  | <a href="https://www.genecards.org/cgi-bin/carddisp.pl?gene=MYH14">https://www.genecards.org/cgi-bin/carddisp.pl?gene=MYH14</a>       |
| MT-TT    | Mitochondrially Encoded TRNA-Thr                                    | RNA Gene       | 15 | GCMTPT015890 | 14.38364792 | <a href="https://www.genecards.org/cgi-bin/carddisp.pl?gene=MT-TT">https://www.genecards.org/cgi-bin/carddisp.pl?gene=MT-TT</a>       |
| KEAP1    | Kelch Like ECH Associated Protein 1                                 | Protein Coding | 48 | GC19M010486  | 14.35438061 | <a href="https://www.genecards.org/cgi-bin/carddisp.pl?gene=KEAP1">https://www.genecards.org/cgi-bin/carddisp.pl?gene=KEAP1</a>       |
| NOS1     | Nitric Oxide Synthase 1                                             | Protein Coding | 50 | GC12M117208  | 14.35239029 | <a href="https://www.genecards.org/cgi-bin/carddisp.pl?gene=NOS1">https://www.genecards.org/cgi-bin/carddisp.pl?gene=NOS1</a>         |
| PPP3CA   | Protein Phosphatase 3 Catalytic Subunit Alpha                       | Protein Coding | 54 | GC04M101024  | 14.35124397 | <a href="https://www.genecards.org/cgi-bin/carddisp.pl?gene=PPP3CA">https://www.genecards.org/cgi-bin/carddisp.pl?gene=PPP3CA</a>     |
| CD68     | CD68 Molecule                                                       | Protein Coding | 40 | GC17P007579  | 14.33781528 | <a href="https://www.genecards.org/cgi-bin/carddisp.pl?gene=CD68">https://www.genecards.org/cgi-bin/carddisp.pl?gene=CD68</a>         |
| GOLM1    | Golgi Membrane Protein 1                                            | Protein Coding | 39 | GC09M086026  | 14.30690002 | <a href="https://www.genecards.org/cgi-bin/carddisp.pl?gene=GOLM1">https://www.genecards.org/cgi-bin/carddisp.pl?gene=GOLM1</a>       |
| KLF6     | Kruppel Like Factor 6                                               | Protein Coding | 44 | GC10M003779  | 14.259799   | <a href="https://www.genecards.org/cgi-bin/carddisp.pl?gene=KLF6">https://www.genecards.org/cgi-bin/carddisp.pl?gene=KLF6</a>         |
| TPM2     | Tropomyosin 2                                                       | Protein Coding | 46 | GC09M035672  | 14.24700546 | <a href="https://www.genecards.org/cgi-bin/carddisp.pl?gene=TPM2">https://www.genecards.org/cgi-bin/carddisp.pl?gene=TPM2</a>         |
| DBH      | Dopamine Beta-Hydroxylase                                           | Protein Coding | 51 | GC09P133636  | 14.19199371 | <a href="https://www.genecards.org/cgi-bin/carddisp.pl?gene=DBH">https://www.genecards.org/cgi-bin/carddisp.pl?gene=DBH</a>           |
| CES2     | Carboxylesterase 2                                                  | Protein Coding | 44 | GC16P066934  | 14.17992878 | <a href="https://www.genecards.org/cgi-bin/carddisp.pl?gene=CES2">https://www.genecards.org/cgi-bin/carddisp.pl?gene=CES2</a>         |

|          |                                                                         |                |    |             |             |                                                                                                                                       |
|----------|-------------------------------------------------------------------------|----------------|----|-------------|-------------|---------------------------------------------------------------------------------------------------------------------------------------|
| HCFC1    | Host Cell Factor C1                                                     | Protein Coding | 47 | GC0XM153947 | 14.17186546 | <a href="https://www.genecards.org/cgi-bin/carddisp.pl?gene=HCFC1">https://www.genecards.org/cgi-bin/carddisp.pl?gene=HCFC1</a>       |
| MIR15B   | MicroRNA 15b                                                            | RNA Gene       | 19 | GC03P160404 | 14.16932392 | <a href="https://www.genecards.org/cgi-bin/carddisp.pl?gene=MIR15B">https://www.genecards.org/cgi-bin/carddisp.pl?gene=MIR15B</a>     |
| LEPOTL1  | Leptin, Serum Levels Of                                                 | Genetic Locus  | 2  | GC02U903086 | 14.10124874 | <a href="https://www.genecards.org/cgi-bin/carddisp.pl?gene=LEPOTL1">https://www.genecards.org/cgi-bin/carddisp.pl?gene=LEPOTL1</a>   |
| IL6ST    | Interleukin 6 Cytokine Family Signal Transducer                         | Protein Coding | 47 | GC05M055935 | 14.09537411 | <a href="https://www.genecards.org/cgi-bin/carddisp.pl?gene=IL6ST">https://www.genecards.org/cgi-bin/carddisp.pl?gene=IL6ST</a>       |
| UBD      | Ubiquitin D                                                             | Protein Coding | 39 | GC06M046741 | 14.06287384 | <a href="https://www.genecards.org/cgi-bin/carddisp.pl?gene=UBD">https://www.genecards.org/cgi-bin/carddisp.pl?gene=UBD</a>           |
| PRDX1    | Peroxioredoxin 1                                                        | Protein Coding | 50 | GC01M045511 | 14.05330944 | <a href="https://www.genecards.org/cgi-bin/carddisp.pl?gene=PRDX1">https://www.genecards.org/cgi-bin/carddisp.pl?gene=PRDX1</a>       |
| NEAT1    | Nuclear Paraspeckle Assembly Transcript                                 | RNA Gene       | 23 | GC11P066222 | 14.03329945 | <a href="https://www.genecards.org/cgi-bin/carddisp.pl?gene=NEAT1">https://www.genecards.org/cgi-bin/carddisp.pl?gene=NEAT1</a>       |
| SULT2A1  | Sulfotransferase Family 2A Member 1                                     | Protein Coding | 45 | GC19M047870 | 13.93974113 | <a href="https://www.genecards.org/cgi-bin/carddisp.pl?gene=SULT2A1">https://www.genecards.org/cgi-bin/carddisp.pl?gene=SULT2A1</a>   |
| MIR24-1  | MicroRNA 24-1                                                           | RNA Gene       | 19 | GC09P095086 | 13.89949894 | <a href="https://www.genecards.org/cgi-bin/carddisp.pl?gene=MIR24-1">https://www.genecards.org/cgi-bin/carddisp.pl?gene=MIR24-1</a>   |
| HDAC1    | Histone Deacetylase 1                                                   | Protein Coding | 50 | GC01P032292 | 13.898386   | <a href="https://www.genecards.org/cgi-bin/carddisp.pl?gene=HDAC1">https://www.genecards.org/cgi-bin/carddisp.pl?gene=HDAC1</a>       |
| FDFT1    | Farnesyl-Diphosphate Farnesyltransferase                                | Protein Coding | 46 | GC08P011795 | 13.89482498 | <a href="https://www.genecards.org/cgi-bin/carddisp.pl?gene=FDFT1">https://www.genecards.org/cgi-bin/carddisp.pl?gene=FDFT1</a>       |
| CYP4F2   | Cytochrome P450 Family 4 Subfamily F Member 2                           | Protein Coding | 45 | GC19M015878 | 13.87469292 | <a href="https://www.genecards.org/cgi-bin/carddisp.pl?gene=CYP4F2">https://www.genecards.org/cgi-bin/carddisp.pl?gene=CYP4F2</a>     |
| MIR154   | MicroRNA 154                                                            | RNA Gene       | 18 | GC14P106303 | 13.86999893 | <a href="https://www.genecards.org/cgi-bin/carddisp.pl?gene=MIR154">https://www.genecards.org/cgi-bin/carddisp.pl?gene=MIR154</a>     |
| RPS6KA3  | Ribosomal Protein S6 Kinase A3                                          | Protein Coding | 53 | GC0XM020149 | 13.83438778 | <a href="https://www.genecards.org/cgi-bin/carddisp.pl?gene=RPS6KA3">https://www.genecards.org/cgi-bin/carddisp.pl?gene=RPS6KA3</a>   |
| CD59     | CD59 Molecule (CD59 Blood Group)                                        | Protein Coding | 47 | GC11M033704 | 13.81402588 | <a href="https://www.genecards.org/cgi-bin/carddisp.pl?gene=CD59">https://www.genecards.org/cgi-bin/carddisp.pl?gene=CD59</a>         |
| LNCARSR  | LncRNA Regulator Of Akt Signaling Associated With HCC And RCC           | RNA Gene       | 11 | GC09M079507 | 13.79727173 | <a href="https://www.genecards.org/cgi-bin/carddisp.pl?gene=LNCARSR">https://www.genecards.org/cgi-bin/carddisp.pl?gene=LNCARSR</a>   |
| CASP7    | Caspase 7                                                               | Protein Coding | 50 | GC10P113679 | 13.77668762 | <a href="https://www.genecards.org/cgi-bin/carddisp.pl?gene=CASP7">https://www.genecards.org/cgi-bin/carddisp.pl?gene=CASP7</a>       |
| SHC1     | SHC Adaptor Protein 1                                                   | Protein Coding | 46 | GC01M154962 | 13.76587296 | <a href="https://www.genecards.org/cgi-bin/carddisp.pl?gene=SHC1">https://www.genecards.org/cgi-bin/carddisp.pl?gene=SHC1</a>         |
| HDAC8    | Histone Deacetylase 8                                                   | Protein Coding | 48 | GC0XM072329 | 13.7309866  | <a href="https://www.genecards.org/cgi-bin/carddisp.pl?gene=HDAC8">https://www.genecards.org/cgi-bin/carddisp.pl?gene=HDAC8</a>       |
| STAT5A   | Signal Transducer And Activator Of Transcription 5A                     | Protein Coding | 47 | GC17P042287 | 13.69988918 | <a href="https://www.genecards.org/cgi-bin/carddisp.pl?gene=STAT5A">https://www.genecards.org/cgi-bin/carddisp.pl?gene=STAT5A</a>     |
| ANGPTL8  | Angiopoietin Like 8                                                     | Protein Coding | 29 | GC19P011238 | 13.67861843 | <a href="https://www.genecards.org/cgi-bin/carddisp.pl?gene=ANGPTL8">https://www.genecards.org/cgi-bin/carddisp.pl?gene=ANGPTL8</a>   |
| MIR331   | MicroRNA 331                                                            | RNA Gene       | 18 | GC12P095308 | 13.670681   | <a href="https://www.genecards.org/cgi-bin/carddisp.pl?gene=MIR331">https://www.genecards.org/cgi-bin/carddisp.pl?gene=MIR331</a>     |
| NDUFA11  | NADH:Ubiquinone Oxidoreductase Subunit A11                              | Protein Coding | 38 | GC19M005891 | 13.65572929 | <a href="https://www.genecards.org/cgi-bin/carddisp.pl?gene=NDUFA11">https://www.genecards.org/cgi-bin/carddisp.pl?gene=NDUFA11</a>   |
| NDUFAB1  | NADH:Ubiquinone Oxidoreductase Subunit AB1                              | Protein Coding | 41 | GC16M023582 | 13.6364193  | <a href="https://www.genecards.org/cgi-bin/carddisp.pl?gene=NDUFAB1">https://www.genecards.org/cgi-bin/carddisp.pl?gene=NDUFAB1</a>   |
| POSTN    | Periostin                                                               | Protein Coding | 44 | GC13M037562 | 13.58043385 | <a href="https://www.genecards.org/cgi-bin/carddisp.pl?gene=POSTN">https://www.genecards.org/cgi-bin/carddisp.pl?gene=POSTN</a>       |
| SI       | Sucrase-Isomaltase                                                      | Protein Coding | 44 | GC03M164978 | 13.53289604 | <a href="https://www.genecards.org/cgi-bin/carddisp.pl?gene=SI">https://www.genecards.org/cgi-bin/carddisp.pl?gene=SI</a>             |
| GABRG2   | Gamma-Aminobutyric Acid Type A Receptor Subunit Gamma2                  | Protein Coding | 48 | GC05P162000 | 13.52079391 | <a href="https://www.genecards.org/cgi-bin/carddisp.pl?gene=GABRG2">https://www.genecards.org/cgi-bin/carddisp.pl?gene=GABRG2</a>     |
| NDUFA9   | NADH:Ubiquinone Oxidoreductase Subunit A9                               | Protein Coding | 44 | GC12P004649 | 13.46017838 | <a href="https://www.genecards.org/cgi-bin/carddisp.pl?gene=NDUFA9">https://www.genecards.org/cgi-bin/carddisp.pl?gene=NDUFA9</a>     |
| CCL4     | C-C Motif Chemokine Ligand 4                                            | Protein Coding | 41 | GC17P036103 | 13.45113277 | <a href="https://www.genecards.org/cgi-bin/carddisp.pl?gene=CCL4">https://www.genecards.org/cgi-bin/carddisp.pl?gene=CCL4</a>         |
| OSM      | Oncostatin M                                                            | Protein Coding | 43 | GC22M030262 | 13.45028496 | <a href="https://www.genecards.org/cgi-bin/carddisp.pl?gene=OSM">https://www.genecards.org/cgi-bin/carddisp.pl?gene=OSM</a>           |
| TXNRD2   | Thioredoxin Reductase 2                                                 | Protein Coding | 48 | GC22M019863 | 13.43647003 | <a href="https://www.genecards.org/cgi-bin/carddisp.pl?gene=TXNRD2">https://www.genecards.org/cgi-bin/carddisp.pl?gene=TXNRD2</a>     |
| IRF3     | Interferon Regulatory Factor 3                                          | Protein Coding | 47 | GC19M049659 | 13.42432785 | <a href="https://www.genecards.org/cgi-bin/carddisp.pl?gene=IRF3">https://www.genecards.org/cgi-bin/carddisp.pl?gene=IRF3</a>         |
| NDUFA2   | NADH:Ubiquinone Oxidoreductase Subunit A2                               | Protein Coding | 43 | GC05M140653 | 13.41955948 | <a href="https://www.genecards.org/cgi-bin/carddisp.pl?gene=NDUFA2">https://www.genecards.org/cgi-bin/carddisp.pl?gene=NDUFA2</a>     |
| TLR1     | Toll Like Receptor 1                                                    | Protein Coding | 48 | GC04M038793 | 13.35544014 | <a href="https://www.genecards.org/cgi-bin/carddisp.pl?gene=TLR1">https://www.genecards.org/cgi-bin/carddisp.pl?gene=TLR1</a>         |
| TXN      | Thioredoxin                                                             | Protein Coding | 46 | GC09M110243 | 13.29109383 | <a href="https://www.genecards.org/cgi-bin/carddisp.pl?gene=TXN">https://www.genecards.org/cgi-bin/carddisp.pl?gene=TXN</a>           |
| IL33     | Interleukin 33                                                          | Protein Coding | 40 | GC09P006206 | 13.25358009 | <a href="https://www.genecards.org/cgi-bin/carddisp.pl?gene=IL33">https://www.genecards.org/cgi-bin/carddisp.pl?gene=IL33</a>         |
| CYC1     | Cytochrome C1                                                           | Protein Coding | 46 | GC08P144095 | 13.20482063 | <a href="https://www.genecards.org/cgi-bin/carddisp.pl?gene=CYC1">https://www.genecards.org/cgi-bin/carddisp.pl?gene=CYC1</a>         |
| FYN      | FYN Proto-Oncogene, Src Family Tyrosine Kinase                          | Protein Coding | 48 | GC06M111660 | 13.20200253 | <a href="https://www.genecards.org/cgi-bin/carddisp.pl?gene=FYN">https://www.genecards.org/cgi-bin/carddisp.pl?gene=FYN</a>           |
| GPC4     | Glypican 4                                                              | Protein Coding | 46 | GC0XM133300 | 13.19788933 | <a href="https://www.genecards.org/cgi-bin/carddisp.pl?gene=GPC4">https://www.genecards.org/cgi-bin/carddisp.pl?gene=GPC4</a>         |
| CANX     | Calnexin                                                                | Protein Coding | 45 | GC05P179678 | 13.18466759 | <a href="https://www.genecards.org/cgi-bin/carddisp.pl?gene=CANX">https://www.genecards.org/cgi-bin/carddisp.pl?gene=CANX</a>         |
| IAH1     | Isoamyl Acetate Hydrolyzing Esterase 1 (Putative)                       | Protein Coding | 34 | GC02P009473 | 13.18420792 | <a href="https://www.genecards.org/cgi-bin/carddisp.pl?gene=IAH1">https://www.genecards.org/cgi-bin/carddisp.pl?gene=IAH1</a>         |
| TSP0     | Translocator Protein                                                    | Protein Coding | 44 | GC22P043151 | 13.14738941 | <a href="https://www.genecards.org/cgi-bin/carddisp.pl?gene=TSP0">https://www.genecards.org/cgi-bin/carddisp.pl?gene=TSP0</a>         |
| WNT3A    | Wnt Family Member 3A                                                    | Protein Coding | 48 | GC01P228466 | 13.12548256 | <a href="https://www.genecards.org/cgi-bin/carddisp.pl?gene=WNT3A">https://www.genecards.org/cgi-bin/carddisp.pl?gene=WNT3A</a>       |
| RB1CC1   | RB1 Inducible Coiled-Coil 1                                             | Protein Coding | 43 | GC08M052622 | 13.06217957 | <a href="https://www.genecards.org/cgi-bin/carddisp.pl?gene=RB1CC1">https://www.genecards.org/cgi-bin/carddisp.pl?gene=RB1CC1</a>     |
| CRH      | Corticotropin Releasing Hormone                                         | Protein Coding | 44 | GC08M066176 | 13.05428314 | <a href="https://www.genecards.org/cgi-bin/carddisp.pl?gene=CRH">https://www.genecards.org/cgi-bin/carddisp.pl?gene=CRH</a>           |
| PIK3CB   | Phosphatidylinositol-4,5-Bisphosphate 3-Kinase Catalytic Subunit Beta   | Protein Coding | 50 | GC03M138652 | 13.05126762 | <a href="https://www.genecards.org/cgi-bin/carddisp.pl?gene=PIK3CB">https://www.genecards.org/cgi-bin/carddisp.pl?gene=PIK3CB</a>     |
| IL17RA   | Interleukin 17 Receptor A                                               | Protein Coding | 45 | GC22P017116 | 13.02085209 | <a href="https://www.genecards.org/cgi-bin/carddisp.pl?gene=IL17RA">https://www.genecards.org/cgi-bin/carddisp.pl?gene=IL17RA</a>     |
| ATF6     | Activating Transcription Factor 6                                       | Protein Coding | 48 | GC01P161766 | 13.00949764 | <a href="https://www.genecards.org/cgi-bin/carddisp.pl?gene=ATF6">https://www.genecards.org/cgi-bin/carddisp.pl?gene=ATF6</a>         |
| ERLIN1   | ER Lipid Raft Associated 1                                              | Protein Coding | 43 | GC10M100150 | 12.97800636 | <a href="https://www.genecards.org/cgi-bin/carddisp.pl?gene=ERLIN1">https://www.genecards.org/cgi-bin/carddisp.pl?gene=ERLIN1</a>     |
| MIR125B1 | MicroRNA 125b-1                                                         | RNA Gene       | 21 | GC11M122100 | 12.97618294 | <a href="https://www.genecards.org/cgi-bin/carddisp.pl?gene=MIR125B1">https://www.genecards.org/cgi-bin/carddisp.pl?gene=MIR125B1</a> |
| OGG1     | 8-Oxoguanine DNA Glycosylase                                            | Protein Coding | 47 | GC03P009751 | 12.94499207 | <a href="https://www.genecards.org/cgi-bin/carddisp.pl?gene=OGG1">https://www.genecards.org/cgi-bin/carddisp.pl?gene=OGG1</a>         |
| HNRNP    | Heterogeneous Nuclear Ribonucleoprotein                                 | Protein Coding | 47 | GC09M086093 | 12.92714214 | <a href="https://www.genecards.org/cgi-bin/carddisp.pl?gene=HNRNP">https://www.genecards.org/cgi-bin/carddisp.pl?gene=HNRNP</a>       |
| LBP      | Lipopolysaccharide Binding Protein                                      | Protein Coding | 44 | GC20P038346 | 12.82848358 | <a href="https://www.genecards.org/cgi-bin/carddisp.pl?gene=LBP">https://www.genecards.org/cgi-bin/carddisp.pl?gene=LBP</a>           |
| APPL1    | Adaptor Protein, Phosphotyrosine Interacting With PH Domain And Leucine | Protein Coding | 46 | GC03P057227 | 12.78715897 | <a href="https://www.genecards.org/cgi-bin/carddisp.pl?gene=APPL1">https://www.genecards.org/cgi-bin/carddisp.pl?gene=APPL1</a>       |
| PHB      | Prohibitin                                                              | Protein Coding | 48 | GC17M049404 | 12.78440094 | <a href="https://www.genecards.org/cgi-bin/carddisp.pl?gene=PHB">https://www.genecards.org/cgi-bin/carddisp.pl?gene=PHB</a>           |
| CLTC     | Clathrin Heavy Chain                                                    | Protein Coding | 47 | GC17P059619 | 12.76284981 | <a href="https://www.genecards.org/cgi-bin/carddisp.pl?gene=CLTC">https://www.genecards.org/cgi-bin/carddisp.pl?gene=CLTC</a>         |
| CCR2     | C-C Motif Chemokine Receptor 2                                          | Protein Coding | 45 | GC03P046356 | 12.69025803 | <a href="https://www.genecards.org/cgi-bin/carddisp.pl?gene=CCR2">https://www.genecards.org/cgi-bin/carddisp.pl?gene=CCR2</a>         |
| MBOAT7   | Membrane Bound O-Acyltransferase Domain Containing 7                    | Protein Coding | 41 | GC19M054173 | 12.66814995 | <a href="https://www.genecards.org/cgi-bin/carddisp.pl?gene=MBOAT7">https://www.genecards.org/cgi-bin/carddisp.pl?gene=MBOAT7</a>     |
| GCLC     | Glutamate-Cysteine Ligase Catalytic                                     | Protein Coding | 44 | GC06M053497 | 12.65995121 | <a href="https://www.genecards.org/cgi-bin/carddisp.pl?gene=GCLC">https://www.genecards.org/cgi-bin/carddisp.pl?gene=GCLC</a>         |
| PKM      | Pyruvate Kinase M1/2                                                    | Protein Coding | 46 | GC15M072199 | 12.65349388 | <a href="https://www.genecards.org/cgi-bin/carddisp.pl?gene=PKM">https://www.genecards.org/cgi-bin/carddisp.pl?gene=PKM</a>           |
| CIDE     | Cell Death Inducing DFFA Like Effector C                                | Protein Coding | 42 | GC03M009866 | 12.6244297  | <a href="https://www.genecards.org/cgi-bin/carddisp.pl?gene=CIDE">https://www.genecards.org/cgi-bin/carddisp.pl?gene=CIDE</a>         |
| TPM3     | Tropomyosin 3                                                           | Protein Coding | 47 | GC01M154127 | 12.62048721 | <a href="https://www.genecards.org/cgi-bin/carddisp.pl?gene=TPM3">https://www.genecards.org/cgi-bin/carddisp.pl?gene=TPM3</a>         |
| IARS1    | Isoleucyl-TRNA Synthetase 1                                             | Protein Coding | 36 | GC09M092211 | 12.5953846  | <a href="https://www.genecards.org/cgi-bin/carddisp.pl?gene=IARS1">https://www.genecards.org/cgi-bin/carddisp.pl?gene=IARS1</a>       |
| ATP5F1E  | ATP Synthase F1 Subunit Epsilon                                         | Protein Coding | 32 | GC20M059026 | 12.58127308 | <a href="https://www.genecards.org/cgi-bin/carddisp.pl?gene=ATP5F1E">https://www.genecards.org/cgi-bin/carddisp.pl?gene=ATP5F1E</a>   |
| PTPN1    | Protein Tyrosine Phosphatase Non-Receptor Type 1                        | Protein Coding | 51 | GC20P050510 | 12.57707119 | <a href="https://www.genecards.org/cgi-bin/carddisp.pl?gene=PTPN1">https://www.genecards.org/cgi-bin/carddisp.pl?gene=PTPN1</a>       |
| FTO      | FTO Alpha-Ketoglutarate Dependent Dioxxygenase                          | Protein Coding | 45 | GC16P053737 | 12.57312965 | <a href="https://www.genecards.org/cgi-bin/carddisp.pl?gene=FTO">https://www.genecards.org/cgi-bin/carddisp.pl?gene=FTO</a>           |
| ANXA2    | Annexin A2                                                              | Protein Coding | 49 | GC15M060347 | 12.57032967 | <a href="https://www.genecards.org/cgi-bin/carddisp.pl?gene=ANXA2">https://www.genecards.org/cgi-bin/carddisp.pl?gene=ANXA2</a>       |
| OLR1     | Oxidized Low Density Lipoprotein Receptor 1                             | Protein Coding | 44 | GC12M015685 | 12.54725552 | <a href="https://www.genecards.org/cgi-bin/carddisp.pl?gene=OLR1">https://www.genecards.org/cgi-bin/carddisp.pl?gene=OLR1</a>         |
| GSK3A    | Glycogen Synthase Kinase 3 Alpha                                        | Protein Coding | 50 | GC19M046852 | 12.53806496 | <a href="https://www.genecards.org/cgi-bin/carddisp.pl?gene=GSK3A">https://www.genecards.org/cgi-bin/carddisp.pl?gene=GSK3A</a>       |
| COX6A2   | Cytochrome C Oxidase Subunit 6A2                                        | Protein Coding | 40 | GC16M031439 | 12.53235722 | <a href="https://www.genecards.org/cgi-bin/carddisp.pl?gene=COX6A2">https://www.genecards.org/cgi-bin/carddisp.pl?gene=COX6A2</a>     |
| DRD1     | Dopamine Receptor D1                                                    | Protein Coding | 45 | GC05M175440 | 12.52599335 | <a href="https://www.genecards.org/cgi-bin/carddisp.pl?gene=DRD1">https://www.genecards.org/cgi-bin/carddisp.pl?gene=DRD1</a>         |
| GPBAR1   | G Protein-Coupled Bile Acid Receptor 1                                  | Protein Coding | 40 | GC02P218259 | 12.50343513 | <a href="https://www.genecards.org/cgi-bin/carddisp.pl?gene=GPBAR1">https://www.genecards.org/cgi-bin/carddisp.pl?gene=GPBAR1</a>     |
| HSPA1A   | Heat Shock Protein Family A (Hsp70) Member 1A                           | Protein Coding | 44 | GC06P055219 | 12.49759865 | <a href="https://www.genecards.org/cgi-bin/carddisp.pl?gene=HSPA1A">https://www.genecards.org/cgi-bin/carddisp.pl?gene=HSPA1A</a>     |
| E2F1     | E2F Transcription Factor 1                                              | Protein Coding | 44 | GC20M033675 | 12.48872185 | <a href="https://www.genecards.org/cgi-bin/carddisp.pl?gene=E2F1">https://www.genecards.org/cgi-bin/carddisp.pl?gene=E2F1</a>         |
| MIR95    | MicroRNA 95                                                             | RNA Gene       | 16 | GC04M008007 | 12.48134708 | <a href="https://www.genecards.org/cgi-bin/carddisp.pl?gene=MIR95">https://www.genecards.org/cgi-bin/carddisp.pl?gene=MIR95</a>       |
| ASCL1    | Achaete-Scute Family BHLH Transcription Factor 1                        | Protein Coding | 45 | GC12P102957 | 12.46600342 | <a href="https://www.genecards.org/cgi-bin/carddisp.pl?gene=ASCL1">https://www.genecards.org/cgi-bin/carddisp.pl?gene=ASCL1</a>       |
| TFEB     | Transcription Factor EB                                                 | Protein Coding | 43 | GC06M047093 | 12.44377232 | <a href="https://www.genecards.org/cgi-bin/carddisp.pl?gene=TFEB">https://www.genecards.org/cgi-bin/carddisp.pl?gene=TFEB</a>         |
| ARPC1B   | Actin Related Protein 2/3 Complex Subunit 1B                            | Protein Coding | 44 | GC07P099374 | 12.43692398 | <a href="https://www.genecards.org/cgi-bin/carddisp.pl?gene=ARPC1B">https://www.genecards.org/cgi-bin/carddisp.pl?gene=ARPC1B</a>     |
| DRD4     | Dopamine Receptor D4                                                    | Protein Coding | 47 | GC11P000979 | 12.43097115 | <a href="https://www.genecards.org/cgi-bin/carddisp.pl?gene=DRD4">https://www.genecards.org/cgi-bin/carddisp.pl?gene=DRD4</a>         |
| IL1RAPL2 | Interleukin 1 Receptor Accessory Protein Like 2                         | Protein Coding | 38 | GC0XP104566 | 12.4201622  | <a href="https://www.genecards.org/cgi-bin/carddisp.pl?gene=IL1RAPL2">https://www.genecards.org/cgi-bin/carddisp.pl?gene=IL1RAPL2</a> |
| TPM1     | Tropomyosin 1                                                           | Protein Coding | 50 | GC15P078910 | 12.40521622 | <a href="https://www.genecards.org/cgi-bin/carddisp.pl?gene=TPM1">https://www.genecards.org/cgi-bin/carddisp.pl?gene=TPM1</a>         |
| IL11     | Interleukin 11                                                          | Protein Coding | 41 | GC19M055364 | 12.38793373 | <a href="https://www.genecards.org/cgi-bin/carddisp.pl?gene=IL11">https://www.genecards.org/cgi-bin/carddisp.pl?gene=IL11</a>         |
| NDUFB10  | NADH:Ubiquinone Oxidoreductase Subunit B10                              | Protein Coding | 44 | GC16P005573 | 12.35549355 | <a href="https://www.genecards.org/cgi-bin/carddisp.pl?gene=NDUFB10">https://www.genecards.org/cgi-bin/carddisp.pl?gene=NDUFB10</a>   |
| IGFBP2   | Insulin Like Growth Factor Binding                                      | Protein Coding | 44 | GC02P216632 | 12.32943249 | <a href="https://www.genecards.org/cgi-bin/carddisp.pl?gene=IGFBP2">https://www.genecards.org/cgi-bin/carddisp.pl?gene=IGFBP2</a>     |
| CFLAR    | CASP8 And FADD Like Apoptosis Regulator                                 | Protein Coding | 47 | GC02P201117 | 12.28454971 | <a href="https://www.genecards.org/cgi-bin/carddisp.pl?gene=CFLAR">https://www.genecards.org/cgi-bin/carddisp.pl?gene=CFLAR</a>       |



|          |                                                                    |                |    |             |             |                                                                                                                                       |
|----------|--------------------------------------------------------------------|----------------|----|-------------|-------------|---------------------------------------------------------------------------------------------------------------------------------------|
| NTS      | Neurotensin                                                        | Protein Coding | 41 | GC12P085876 | 12.27574921 | <a href="https://www.genecards.org/cgi-bin/carddisp.pl?gene=NTS">https://www.genecards.org/cgi-bin/carddisp.pl?gene=NTS</a>           |
| DPM1     | Dolichyl-Phosphate Mannosyltransferase Subunit 1, Catalytic        | Protein Coding | 45 | GC20M050934 | 12.26564312 | <a href="https://www.genecards.org/cgi-bin/carddisp.pl?gene=DPM1">https://www.genecards.org/cgi-bin/carddisp.pl?gene=DPM1</a>         |
| STUB1    | STI1P Homology And U-Box Containing Protein 1                      | Protein Coding | 46 | GC16P005516 | 12.25460815 | <a href="https://www.genecards.org/cgi-bin/carddisp.pl?gene=STUB1">https://www.genecards.org/cgi-bin/carddisp.pl?gene=STUB1</a>       |
| XRCC4    | X-Ray Repair Cross Complementing 4                                 | Protein Coding | 44 | GC05P083077 | 12.23878098 | <a href="https://www.genecards.org/cgi-bin/carddisp.pl?gene=XRCC4">https://www.genecards.org/cgi-bin/carddisp.pl?gene=XRCC4</a>       |
| RPL5     | Ribosomal Protein L5                                               | Protein Coding | 48 | GC01P092832 | 12.23239803 | <a href="https://www.genecards.org/cgi-bin/carddisp.pl?gene=RPL5">https://www.genecards.org/cgi-bin/carddisp.pl?gene=RPL5</a>         |
| CYP2J2   | Cytochrome P450 Family 2 Subfamily J Member 2                      | Protein Coding | 45 | GC01M059893 | 12.15305138 | <a href="https://www.genecards.org/cgi-bin/carddisp.pl?gene=CYP2J2">https://www.genecards.org/cgi-bin/carddisp.pl?gene=CYP2J2</a>     |
| SERPINA7 | Serpin Family A Member 7                                           | Protein Coding | 40 | GC0XM106032 | 12.11055183 | <a href="https://www.genecards.org/cgi-bin/carddisp.pl?gene=SERPINA7">https://www.genecards.org/cgi-bin/carddisp.pl?gene=SERPINA7</a> |
| DRD3     | Dopamine Receptor D3                                               | Protein Coding | 45 | GC03M114128 | 12.10384369 | <a href="https://www.genecards.org/cgi-bin/carddisp.pl?gene=DRD3">https://www.genecards.org/cgi-bin/carddisp.pl?gene=DRD3</a>         |
| SF3B1    | Splicing Factor 3b Subunit 1                                       | Protein Coding | 45 | GC02M197393 | 12.0990696  | <a href="https://www.genecards.org/cgi-bin/carddisp.pl?gene=SF3B1">https://www.genecards.org/cgi-bin/carddisp.pl?gene=SF3B1</a>       |
| ACE2     | Angiotensin Converting Enzyme 2                                    | Protein Coding | 49 | GC0XM015494 | 12.09478569 | <a href="https://www.genecards.org/cgi-bin/carddisp.pl?gene=ACE2">https://www.genecards.org/cgi-bin/carddisp.pl?gene=ACE2</a>         |
| MDH2     | Malate Dehydrogenase 2                                             | Protein Coding | 49 | GC07P076048 | 12.08661652 | <a href="https://www.genecards.org/cgi-bin/carddisp.pl?gene=MDH2">https://www.genecards.org/cgi-bin/carddisp.pl?gene=MDH2</a>         |
| CDK8     | Cyclin Dependent Kinase 8                                          | Protein Coding | 48 | GC13P026254 | 12.06512737 | <a href="https://www.genecards.org/cgi-bin/carddisp.pl?gene=CDK8">https://www.genecards.org/cgi-bin/carddisp.pl?gene=CDK8</a>         |
| SCAP     | SREBF Chaperone                                                    | Protein Coding | 41 | GC03M047413 | 12.04054737 | <a href="https://www.genecards.org/cgi-bin/carddisp.pl?gene=SCAP">https://www.genecards.org/cgi-bin/carddisp.pl?gene=SCAP</a>         |
| COL12A1  | Collagen Type XII Alpha 1 Chain                                    | Protein Coding | 42 | GC06M075084 | 11.98452568 | <a href="https://www.genecards.org/cgi-bin/carddisp.pl?gene=COL12A1">https://www.genecards.org/cgi-bin/carddisp.pl?gene=COL12A1</a>   |
| PALLD    | Palladin, Cytoskeletal Associated Protein                          | Protein Coding | 44 | GC04P168497 | 11.97765255 | <a href="https://www.genecards.org/cgi-bin/carddisp.pl?gene=PALLD">https://www.genecards.org/cgi-bin/carddisp.pl?gene=PALLD</a>       |
| MAPK9    | Mitogen-Activated Protein Kinase 9                                 | Protein Coding | 49 | GC05M180234 | 11.97732925 | <a href="https://www.genecards.org/cgi-bin/carddisp.pl?gene=MAPK9">https://www.genecards.org/cgi-bin/carddisp.pl?gene=MAPK9</a>       |
| CLCN2    | Chloride Voltage-Gated Channel 2                                   | Protein Coding | 47 | GC03M184346 | 11.97595787 | <a href="https://www.genecards.org/cgi-bin/carddisp.pl?gene=CLCN2">https://www.genecards.org/cgi-bin/carddisp.pl?gene=CLCN2</a>       |
| COX7A2   | Cytochrome C Oxidase Subunit 7A2                                   | Protein Coding | 39 | GC06M075237 | 11.96281242 | <a href="https://www.genecards.org/cgi-bin/carddisp.pl?gene=COX7A2">https://www.genecards.org/cgi-bin/carddisp.pl?gene=COX7A2</a>     |
| SRD5A2   | Steroid 5 Alpha-Reductase 2                                        | Protein Coding | 43 | GC02M031522 | 11.95817089 | <a href="https://www.genecards.org/cgi-bin/carddisp.pl?gene=SRD5A2">https://www.genecards.org/cgi-bin/carddisp.pl?gene=SRD5A2</a>     |
| HUWE1    | HECT, UBA And WWE Domain Containing E3 Ubiquitin Protein Ligase 1  | Protein Coding | 44 | GC0XM053532 | 11.95288658 | <a href="https://www.genecards.org/cgi-bin/carddisp.pl?gene=HUWE1">https://www.genecards.org/cgi-bin/carddisp.pl?gene=HUWE1</a>       |
| LPIN1    | Lipin 1                                                            | Protein Coding | 48 | GC02P011677 | 11.95048332 | <a href="https://www.genecards.org/cgi-bin/carddisp.pl?gene=LPIN1">https://www.genecards.org/cgi-bin/carddisp.pl?gene=LPIN1</a>       |
| SLC25A1  | Solute Carrier Family 25 Member 1                                  | Protein Coding | 47 | GC02M019177 | 11.93685532 | <a href="https://www.genecards.org/cgi-bin/carddisp.pl?gene=SLC25A1">https://www.genecards.org/cgi-bin/carddisp.pl?gene=SLC25A1</a>   |
| UQCRCF1  | Ubiquinol-Cytochrome C Reductase, Rieske Iron-Sulfur Polypeptide 1 | Protein Coding | 47 | GC19M029205 | 11.9285717  | <a href="https://www.genecards.org/cgi-bin/carddisp.pl?gene=UQCRCF1">https://www.genecards.org/cgi-bin/carddisp.pl?gene=UQCRCF1</a>   |
| MIR187   | MicroRNA 187                                                       | RNA Gene       | 18 | GC18M035904 | 11.92744637 | <a href="https://www.genecards.org/cgi-bin/carddisp.pl?gene=MIR187">https://www.genecards.org/cgi-bin/carddisp.pl?gene=MIR187</a>     |
| DHCR24   | 24-Dehydrocholesterol Reductase                                    | Protein Coding | 46 | GC01M058489 | 11.92619324 | <a href="https://www.genecards.org/cgi-bin/carddisp.pl?gene=DHCR24">https://www.genecards.org/cgi-bin/carddisp.pl?gene=DHCR24</a>     |
| FGL1     | Fibrinogen Like 1                                                  | Protein Coding | 41 | GC08M017864 | 11.92427444 | <a href="https://www.genecards.org/cgi-bin/carddisp.pl?gene=FGL1">https://www.genecards.org/cgi-bin/carddisp.pl?gene=FGL1</a>         |
| HNRNPNU  | Heterogeneous Nuclear Ribonucleoprotein VTN                        | Protein Coding | 43 | GC01M244844 | 11.87169933 | <a href="https://www.genecards.org/cgi-bin/carddisp.pl?gene=HNRNPNU">https://www.genecards.org/cgi-bin/carddisp.pl?gene=HNRNPNU</a>   |
| VTN      | Vitronectin                                                        | Protein Coding | 44 | GC17M031079 | 11.84849072 | <a href="https://www.genecards.org/cgi-bin/carddisp.pl?gene=VTN">https://www.genecards.org/cgi-bin/carddisp.pl?gene=VTN</a>           |
| FOXO2    | Forkhead Box C2                                                    | Protein Coding | 45 | GC16P086570 | 11.80293083 | <a href="https://www.genecards.org/cgi-bin/carddisp.pl?gene=FOXO2">https://www.genecards.org/cgi-bin/carddisp.pl?gene=FOXO2</a>       |
| GREM1    | Gremlin 1, DAN Family BMP Antagonist                               | Protein Coding | 44 | GC15P033128 | 11.79185867 | <a href="https://www.genecards.org/cgi-bin/carddisp.pl?gene=GREM1">https://www.genecards.org/cgi-bin/carddisp.pl?gene=GREM1</a>       |
| EGR1     | Early Growth Response 1                                            | Protein Coding | 44 | GC05P138465 | 11.78876686 | <a href="https://www.genecards.org/cgi-bin/carddisp.pl?gene=EGR1">https://www.genecards.org/cgi-bin/carddisp.pl?gene=EGR1</a>         |
| RDH5     | Retinol Dehydrogenase 5                                            | Protein Coding | 47 | GC12P055720 | 11.77545261 | <a href="https://www.genecards.org/cgi-bin/carddisp.pl?gene=RDH5">https://www.genecards.org/cgi-bin/carddisp.pl?gene=RDH5</a>         |
| LECT2    | Leukocyte Cell Derived Chemotaxin 2                                | Protein Coding | 37 | GC05M135922 | 11.76731968 | <a href="https://www.genecards.org/cgi-bin/carddisp.pl?gene=LECT2">https://www.genecards.org/cgi-bin/carddisp.pl?gene=LECT2</a>       |
| UBQLN4   | Ubiquilin 4                                                        | Protein Coding | 40 | GC01M156033 | 11.59201622 | <a href="https://www.genecards.org/cgi-bin/carddisp.pl?gene=UBQLN4">https://www.genecards.org/cgi-bin/carddisp.pl?gene=UBQLN4</a>     |
| CYP4F3   | Cytochrome P450 Family 4 Subfamily F Member 3                      | Protein Coding | 44 | GC19P015640 | 11.56530571 | <a href="https://www.genecards.org/cgi-bin/carddisp.pl?gene=CYP4F3">https://www.genecards.org/cgi-bin/carddisp.pl?gene=CYP4F3</a>     |
| RUNX3    | RUNX Family Transcription Factor 3                                 | Protein Coding | 44 | GC01M024899 | 11.55098152 | <a href="https://www.genecards.org/cgi-bin/carddisp.pl?gene=RUNX3">https://www.genecards.org/cgi-bin/carddisp.pl?gene=RUNX3</a>       |
| STING1   | Stimulator Of Interferon Response CGAMP Interactor 1               | Protein Coding | 34 | GC05M139476 | 11.53891373 | <a href="https://www.genecards.org/cgi-bin/carddisp.pl?gene=STING1">https://www.genecards.org/cgi-bin/carddisp.pl?gene=STING1</a>     |
| SPTAN1   | Spectrin Alpha, Non-Erythrocytic 1                                 | Protein Coding | 48 | GC09P128552 | 11.51099682 | <a href="https://www.genecards.org/cgi-bin/carddisp.pl?gene=SPTAN1">https://www.genecards.org/cgi-bin/carddisp.pl?gene=SPTAN1</a>     |
| IGF2BP2  | Insulin Like Growth Factor 2 MRNA Binding Protein 2                | Protein Coding | 44 | GC03M185643 | 11.45017338 | <a href="https://www.genecards.org/cgi-bin/carddisp.pl?gene=IGF2BP2">https://www.genecards.org/cgi-bin/carddisp.pl?gene=IGF2BP2</a>   |
| FOXF1    | Forkhead Box F1                                                    | Protein Coding | 43 | GC16P086510 | 11.43947029 | <a href="https://www.genecards.org/cgi-bin/carddisp.pl?gene=FOXF1">https://www.genecards.org/cgi-bin/carddisp.pl?gene=FOXF1</a>       |
| HYOU1    | Hypoxia Up-Regulated 1                                             | Protein Coding | 44 | GC11M119045 | 11.43041039 | <a href="https://www.genecards.org/cgi-bin/carddisp.pl?gene=HYOU1">https://www.genecards.org/cgi-bin/carddisp.pl?gene=HYOU1</a>       |
| CNR2     | Cannabinoid Receptor 2                                             | Protein Coding | 46 | GC01M023870 | 11.39825153 | <a href="https://www.genecards.org/cgi-bin/carddisp.pl?gene=CNR2">https://www.genecards.org/cgi-bin/carddisp.pl?gene=CNR2</a>         |
| PRPF8    | Pre-MRNA Processing Factor 8                                       | Protein Coding | 42 | GC17M001650 | 11.3741169  | <a href="https://www.genecards.org/cgi-bin/carddisp.pl?gene=PRPF8">https://www.genecards.org/cgi-bin/carddisp.pl?gene=PRPF8</a>       |
| PTX3     | Pentraxin 3                                                        | Protein Coding | 43 | GC03P157436 | 11.37303257 | <a href="https://www.genecards.org/cgi-bin/carddisp.pl?gene=PTX3">https://www.genecards.org/cgi-bin/carddisp.pl?gene=PTX3</a>         |
| ACLY     | ATP Citrate Lyase                                                  | Protein Coding | 47 | GC17M041866 | 11.3557663  | <a href="https://www.genecards.org/cgi-bin/carddisp.pl?gene=ACLY">https://www.genecards.org/cgi-bin/carddisp.pl?gene=ACLY</a>         |
| GAL      | Galanin And GMAP Prepropeptide                                     | Protein Coding | 45 | GC11P068684 | 11.31365013 | <a href="https://www.genecards.org/cgi-bin/carddisp.pl?gene=GAL">https://www.genecards.org/cgi-bin/carddisp.pl?gene=GAL</a>           |
| EPAS1    | Endothelial PAS Domain Protein 1                                   | Protein Coding | 50 | GC02P046293 | 11.29292488 | <a href="https://www.genecards.org/cgi-bin/carddisp.pl?gene=EPAS1">https://www.genecards.org/cgi-bin/carddisp.pl?gene=EPAS1</a>       |
| BCL2L11  | BCL2 Like 11                                                       | Protein Coding | 45 | GC02P111119 | 11.28868675 | <a href="https://www.genecards.org/cgi-bin/carddisp.pl?gene=BCL2L11">https://www.genecards.org/cgi-bin/carddisp.pl?gene=BCL2L11</a>   |
| ADH5     | Alcohol Dehydrogenase 5 (Class III), Chi Polypeptide               | Protein Coding | 47 | GC04M099070 | 11.26165009 | <a href="https://www.genecards.org/cgi-bin/carddisp.pl?gene=ADH5">https://www.genecards.org/cgi-bin/carddisp.pl?gene=ADH5</a>         |
| P2RX7    | Purinergic Receptor P2X 7                                          | Protein Coding | 46 | GC12P123575 | 11.25559235 | <a href="https://www.genecards.org/cgi-bin/carddisp.pl?gene=P2RX7">https://www.genecards.org/cgi-bin/carddisp.pl?gene=P2RX7</a>       |
| UQCRCQ   | Ubiquinol-Cytochrome C Reductase Complex III Subunit VII           | Protein Coding | 42 | GC05P132866 | 11.23309517 | <a href="https://www.genecards.org/cgi-bin/carddisp.pl?gene=UQCRCQ">https://www.genecards.org/cgi-bin/carddisp.pl?gene=UQCRCQ</a>     |
| SFRP4    | Secreted Frizzled Related Protein 4                                | Protein Coding | 44 | GC07M037912 | 11.23053169 | <a href="https://www.genecards.org/cgi-bin/carddisp.pl?gene=SFRP4">https://www.genecards.org/cgi-bin/carddisp.pl?gene=SFRP4</a>       |
| NOX4     | NADPH Oxidase 4                                                    | Protein Coding | 43 | GC11M089324 | 11.20555115 | <a href="https://www.genecards.org/cgi-bin/carddisp.pl?gene=NOX4">https://www.genecards.org/cgi-bin/carddisp.pl?gene=NOX4</a>         |
| PHGDH    | Phosphoglycerate Dehydrogenase                                     | Protein Coding | 50 | GC01P119660 | 11.1698761  | <a href="https://www.genecards.org/cgi-bin/carddisp.pl?gene=PHGDH">https://www.genecards.org/cgi-bin/carddisp.pl?gene=PHGDH</a>       |
| TKT      | Transketolase                                                      | Protein Coding | 48 | GC03M053224 | 11.16229248 | <a href="https://www.genecards.org/cgi-bin/carddisp.pl?gene=TKT">https://www.genecards.org/cgi-bin/carddisp.pl?gene=TKT</a>           |
| ITGA8    | Integrin Subunit Alpha 8                                           | Protein Coding | 43 | GC10M015513 | 11.15959072 | <a href="https://www.genecards.org/cgi-bin/carddisp.pl?gene=ITGA8">https://www.genecards.org/cgi-bin/carddisp.pl?gene=ITGA8</a>       |
| LPCAT3   | Lysophosphatidylcholine Acyltransferase 3                          | Protein Coding | 36 | GC12M006976 | 11.08821201 | <a href="https://www.genecards.org/cgi-bin/carddisp.pl?gene=LPCAT3">https://www.genecards.org/cgi-bin/carddisp.pl?gene=LPCAT3</a>     |
| IFNAR1   | Interferon Alpha And Beta Receptor Subunit 1                       | Protein Coding | 45 | GC21P033324 | 11.03121376 | <a href="https://www.genecards.org/cgi-bin/carddisp.pl?gene=IFNAR1">https://www.genecards.org/cgi-bin/carddisp.pl?gene=IFNAR1</a>     |
| CPB2     | Carboxypeptidase B2                                                | Protein Coding | 45 | GC13M046053 | 11.02668762 | <a href="https://www.genecards.org/cgi-bin/carddisp.pl?gene=CPB2">https://www.genecards.org/cgi-bin/carddisp.pl?gene=CPB2</a>         |
| CLRN1    | Clarín 1                                                           | Protein Coding | 35 | GC03M150926 | 11.02517796 | <a href="https://www.genecards.org/cgi-bin/carddisp.pl?gene=CLRN1">https://www.genecards.org/cgi-bin/carddisp.pl?gene=CLRN1</a>       |
| TLR6     | Toll Like Receptor 6                                               | Protein Coding | 44 | GC04M038828 | 11.0105896  | <a href="https://www.genecards.org/cgi-bin/carddisp.pl?gene=TLR6">https://www.genecards.org/cgi-bin/carddisp.pl?gene=TLR6</a>         |
| AREG     | Amphiregulin                                                       | Protein Coding | 43 | GC04P074445 | 10.98157692 | <a href="https://www.genecards.org/cgi-bin/carddisp.pl?gene=AREG">https://www.genecards.org/cgi-bin/carddisp.pl?gene=AREG</a>         |
| RARS1    | Arginyl-tRNA Synthetase 1                                          | Protein Coding | 37 | GC05P168487 | 10.95300484 | <a href="https://www.genecards.org/cgi-bin/carddisp.pl?gene=RARS1">https://www.genecards.org/cgi-bin/carddisp.pl?gene=RARS1</a>       |
| SOD3     | Superoxide Dismutase 3                                             | Protein Coding | 41 | GC04P024798 | 10.91558552 | <a href="https://www.genecards.org/cgi-bin/carddisp.pl?gene=SOD3">https://www.genecards.org/cgi-bin/carddisp.pl?gene=SOD3</a>         |
| P4HB     | Prolyl 4-Hydroxylase Subunit Beta                                  | Protein Coding | 50 | GC17M081843 | 10.91475868 | <a href="https://www.genecards.org/cgi-bin/carddisp.pl?gene=P4HB">https://www.genecards.org/cgi-bin/carddisp.pl?gene=P4HB</a>         |
| HNMT     | Histamine N-Methyltransferase                                      | Protein Coding | 46 | GC02P137964 | 10.89535236 | <a href="https://www.genecards.org/cgi-bin/carddisp.pl?gene=HNMT">https://www.genecards.org/cgi-bin/carddisp.pl?gene=HNMT</a>         |
| BIRC3    | Baculoviral IAP Repeat Containing 3                                | Protein Coding | 47 | GC11P102317 | 10.89016342 | <a href="https://www.genecards.org/cgi-bin/carddisp.pl?gene=BIRC3">https://www.genecards.org/cgi-bin/carddisp.pl?gene=BIRC3</a>       |
| MAP3K7   | Mitogen-Activated Protein Kinase Kinase 7                          | Protein Coding | 51 | GC06M090513 | 10.88270187 | <a href="https://www.genecards.org/cgi-bin/carddisp.pl?gene=MAP3K7">https://www.genecards.org/cgi-bin/carddisp.pl?gene=MAP3K7</a>     |
| MIR30C1  | MicroRNA 30c-1                                                     | RNA Gene       | 22 | GC01P040757 | 10.82134056 | <a href="https://www.genecards.org/cgi-bin/carddisp.pl?gene=MIR30C1">https://www.genecards.org/cgi-bin/carddisp.pl?gene=MIR30C1</a>   |
| ENPP2    | Ectonucleotide Pyrophosphatase/Phosphodiesterase 2                 | Protein Coding | 44 | GC08M119556 | 10.81968975 | <a href="https://www.genecards.org/cgi-bin/carddisp.pl?gene=ENPP2">https://www.genecards.org/cgi-bin/carddisp.pl?gene=ENPP2</a>       |
| JCAD     | Junctional Cadherin 5 Associated                                   | Protein Coding | 26 | GC10M030012 | 10.79609871 | <a href="https://www.genecards.org/cgi-bin/carddisp.pl?gene=JCAD">https://www.genecards.org/cgi-bin/carddisp.pl?gene=JCAD</a>         |
| RTN4     | Reticulon 4                                                        | Protein Coding | 45 | GC02M054934 | 10.78720856 | <a href="https://www.genecards.org/cgi-bin/carddisp.pl?gene=RTN4">https://www.genecards.org/cgi-bin/carddisp.pl?gene=RTN4</a>         |
| COX4I2   | Cytochrome C Oxidase Subunit 4I2                                   | Protein Coding | 43 | GC20P031637 | 10.7298584  | <a href="https://www.genecards.org/cgi-bin/carddisp.pl?gene=COX4I2">https://www.genecards.org/cgi-bin/carddisp.pl?gene=COX4I2</a>     |
| NNMT     | Nicotinamide N-Methyltransferase                                   | Protein Coding | 46 | GC11P114257 | 10.72583866 | <a href="https://www.genecards.org/cgi-bin/carddisp.pl?gene=NNMT">https://www.genecards.org/cgi-bin/carddisp.pl?gene=NNMT</a>         |
| IL16     | Interleukin 16                                                     | Protein Coding | 43 | GC15P081159 | 10.7183075  | <a href="https://www.genecards.org/cgi-bin/carddisp.pl?gene=IL16">https://www.genecards.org/cgi-bin/carddisp.pl?gene=IL16</a>         |
| TRAPPC9  | Trafficking Protein Particle Complex Subunit 9                     | Protein Coding | 39 | GC08M139728 | 10.7010622  | <a href="https://www.genecards.org/cgi-bin/carddisp.pl?gene=TRAPPC9">https://www.genecards.org/cgi-bin/carddisp.pl?gene=TRAPPC9</a>   |
| SERPINB3 | Serpin Family B Member 3                                           | Protein Coding | 43 | GC18M063655 | 10.66518497 | <a href="https://www.genecards.org/cgi-bin/carddisp.pl?gene=SERPINB3">https://www.genecards.org/cgi-bin/carddisp.pl?gene=SERPINB3</a> |
| MYL2     | Myosin Light Chain 2                                               | Protein Coding | 50 | GC12M110910 | 10.65204239 | <a href="https://www.genecards.org/cgi-bin/carddisp.pl?gene=MYL2">https://www.genecards.org/cgi-bin/carddisp.pl?gene=MYL2</a>         |
| IL18RAP  | Interleukin 18 Receptor Accessory Protein                          | Protein Coding | 39 | GC02P102418 | 10.53256416 | <a href="https://www.genecards.org/cgi-bin/carddisp.pl?gene=IL18RAP">https://www.genecards.org/cgi-bin/carddisp.pl?gene=IL18RAP</a>   |
| ADH1A    | Alcohol Dehydrogenase 1A (Class I), Alpha Polypeptide              | Protein Coding | 43 | GC04M099276 | 10.49468613 | <a href="https://www.genecards.org/cgi-bin/carddisp.pl?gene=ADH1A">https://www.genecards.org/cgi-bin/carddisp.pl?gene=ADH1A</a>       |
| CUL3     | Cullin 3                                                           | Protein Coding | 47 | GC02M224470 | 10.49339867 | <a href="https://www.genecards.org/cgi-bin/carddisp.pl?gene=CUL3">https://www.genecards.org/cgi-bin/carddisp.pl?gene=CUL3</a>         |
| TRIB1    | Tribbles Pseudokinase 1                                            | Protein Coding | 38 | GC08P125430 | 10.48884678 | <a href="https://www.genecards.org/cgi-bin/carddisp.pl?gene=TRIB1">https://www.genecards.org/cgi-bin/carddisp.pl?gene=TRIB1</a>       |
| JAZF1    | JAZF Zinc Finger 1                                                 | Protein Coding | 39 | GC07M027830 | 10.43261147 | <a href="https://www.genecards.org/cgi-bin/carddisp.pl?gene=JAZF1">https://www.genecards.org/cgi-bin/carddisp.pl?gene=JAZF1</a>       |
| OGT      | O-Linked N-Acetylglucosamine (GlcNAc) Transferase                  | Protein Coding | 45 | GC0XP071534 | 10.3878212  | <a href="https://www.genecards.org/cgi-bin/carddisp.pl?gene=OGT">https://www.genecards.org/cgi-bin/carddisp.pl?gene=OGT</a>           |
| PKD4     | Pyruvate Dehydrogenase Kinase 4                                    | Protein Coding | 47 | GC07M095583 | 10.38490677 | <a href="https://www.genecards.org/cgi-bin/carddisp.pl?gene=PKD4">https://www.genecards.org/cgi-bin/carddisp.pl?gene=PKD4</a>         |
| GFPT1    | Glutamine--Fructose-6-Phosphate Transaminase 1                     | Protein Coding | 47 | GC02M069283 | 10.33113861 | <a href="https://www.genecards.org/cgi-bin/carddisp.pl?gene=GFPT1">https://www.genecards.org/cgi-bin/carddisp.pl?gene=GFPT1</a>       |
| USF1     | Upstream Transcription Factor 1                                    | Protein Coding | 44 | GC01M161039 | 10.30202293 | <a href="https://www.genecards.org/cgi-bin/carddisp.pl?gene=USF1">https://www.genecards.org/cgi-bin/carddisp.pl?gene=USF1</a>         |
| COLGALT1 | Collagen Beta (1-O)Galactosyltransferase 1                         | Protein Coding | 37 | GC19P017555 | 10.28843689 | <a href="https://www.genecards.org/cgi-bin/carddisp.pl?gene=COLGALT1">https://www.genecards.org/cgi-bin/carddisp.pl?gene=COLGALT1</a> |
| CYGB     | Cytoglobin                                                         | Protein Coding | 39 | GC17M076527 | 10.2549715  | <a href="https://www.genecards.org/cgi-bin/carddisp.pl?gene=CYGB">https://www.genecards.org/cgi-bin/carddisp.pl?gene=CYGB</a>         |
| APEX1    | Apurinic/Apyrimidinic Endonuclease 1                               | Protein Coding | 45 | GC14P020455 | 10.24124527 | <a href="https://www.genecards.org/cgi-bin/carddisp.pl?gene=APEX1">https://www.genecards.org/cgi-bin/carddisp.pl?gene=APEX1</a>       |

|           |                                                                              |                |    |             |             |                                                                                                                                         |
|-----------|------------------------------------------------------------------------------|----------------|----|-------------|-------------|-----------------------------------------------------------------------------------------------------------------------------------------|
| MATN3     | Matrilin 3                                                                   | Protein Coding | 43 | GC02M019992 | 10.21483612 | <a href="https://www.genecards.org/cgi-bin/carddisp.pl?gene=MATN3">https://www.genecards.org/cgi-bin/carddisp.pl?gene=MATN3</a>         |
| MIR423    | MicroRNA 423                                                                 | RNA Gene       | 18 | GC17P030117 | 10.20427418 | <a href="https://www.genecards.org/cgi-bin/carddisp.pl?gene=MIR423">https://www.genecards.org/cgi-bin/carddisp.pl?gene=MIR423</a>       |
| PIK3R3    | Phosphoinositide-3-Kinase Regulatory Subunit 3                               | Protein Coding | 44 | GC01M046041 | 10.13710117 | <a href="https://www.genecards.org/cgi-bin/carddisp.pl?gene=PIK3R3">https://www.genecards.org/cgi-bin/carddisp.pl?gene=PIK3R3</a>       |
| PDGFA     | Platelet Derived Growth Factor Subunit A                                     | Protein Coding | 44 | GC07M000497 | 10.11775589 | <a href="https://www.genecards.org/cgi-bin/carddisp.pl?gene=PDGFA">https://www.genecards.org/cgi-bin/carddisp.pl?gene=PDGFA</a>         |
| MLX       | MAX Dimerization Protein MLX                                                 | Protein Coding | 44 | GC17P042567 | 10.06453514 | <a href="https://www.genecards.org/cgi-bin/carddisp.pl?gene=MLX">https://www.genecards.org/cgi-bin/carddisp.pl?gene=MLX</a>             |
| NDUFC2    | NADH:Ubiquinone Oxidoreductase Subunit C2                                    | Protein Coding | 41 | GC11M078068 | 10.09604931 | <a href="https://www.genecards.org/cgi-bin/carddisp.pl?gene=NDUFC2">https://www.genecards.org/cgi-bin/carddisp.pl?gene=NDUFC2</a>       |
| RORA      | RAR Related Orphan Receptor A                                                | Protein Coding | 50 | GC15M060488 | 10.09284115 | <a href="https://www.genecards.org/cgi-bin/carddisp.pl?gene=RORA">https://www.genecards.org/cgi-bin/carddisp.pl?gene=RORA</a>           |
| SLC39A14  | Solute Carrier Family 39 Member 14                                           | Protein Coding | 44 | GC06P022367 | 10.06453514 | <a href="https://www.genecards.org/cgi-bin/carddisp.pl?gene=SLC39A14">https://www.genecards.org/cgi-bin/carddisp.pl?gene=SLC39A14</a>   |
| MGAM      | Maltase-Glucoamylase                                                         | Protein Coding | 42 | GC07P145925 | 10.06344604 | <a href="https://www.genecards.org/cgi-bin/carddisp.pl?gene=MGAM">https://www.genecards.org/cgi-bin/carddisp.pl?gene=MGAM</a>           |
| NLR4      | NLR Family CARD Domain Containing 4                                          | Protein Coding | 45 | GC02M032224 | 10.02363777 | <a href="https://www.genecards.org/cgi-bin/carddisp.pl?gene=NLR4">https://www.genecards.org/cgi-bin/carddisp.pl?gene=NLR4</a>           |
| MIR30B    | MicroRNA 30b                                                                 | RNA Gene       | 20 | GC08M134800 | 10.00792694 | <a href="https://www.genecards.org/cgi-bin/carddisp.pl?gene=MIR30B">https://www.genecards.org/cgi-bin/carddisp.pl?gene=MIR30B</a>       |
| TRIM21    | Tripartite Motif Containing 21                                               | Protein Coding | 43 | GC11M004384 | 10.00412178 | <a href="https://www.genecards.org/cgi-bin/carddisp.pl?gene=TRIM21">https://www.genecards.org/cgi-bin/carddisp.pl?gene=TRIM21</a>       |
| NOS1AP    | Nitric Oxide Synthase 1 Adaptor Protein                                      | Protein Coding | 39 | GC01P162069 | 9.991197586 | <a href="https://www.genecards.org/cgi-bin/carddisp.pl?gene=NOS1AP">https://www.genecards.org/cgi-bin/carddisp.pl?gene=NOS1AP</a>       |
| SNRNP200  | Small Nuclear Ribonucleoprotein U5 Subunit 200                               | Protein Coding | 42 | GC02M096363 | 9.948816299 | <a href="https://www.genecards.org/cgi-bin/carddisp.pl?gene=SNRNP200">https://www.genecards.org/cgi-bin/carddisp.pl?gene=SNRNP200</a>   |
| CACNA2D1  | Calcium Voltage-Gated Channel Auxiliary Subunit Alpha2delta 1                | Protein Coding | 47 | GC07M081946 | 9.947055817 | <a href="https://www.genecards.org/cgi-bin/carddisp.pl?gene=CACNA2D1">https://www.genecards.org/cgi-bin/carddisp.pl?gene=CACNA2D1</a>   |
| PRPF3     | Pre-mRNA Processing Factor 3                                                 | Protein Coding | 44 | GC01P150321 | 9.927322388 | <a href="https://www.genecards.org/cgi-bin/carddisp.pl?gene=PRPF3">https://www.genecards.org/cgi-bin/carddisp.pl?gene=PRPF3</a>         |
| PRDX5     | Peroxisedoxin 5                                                              | Protein Coding | 47 | GC11P064317 | 9.915092468 | <a href="https://www.genecards.org/cgi-bin/carddisp.pl?gene=PRDX5">https://www.genecards.org/cgi-bin/carddisp.pl?gene=PRDX5</a>         |
| GOT1      | Glutamic-Oxaloacetic Transaminase 1                                          | Protein Coding | 47 | GC10M099396 | 9.902200699 | <a href="https://www.genecards.org/cgi-bin/carddisp.pl?gene=GOT1">https://www.genecards.org/cgi-bin/carddisp.pl?gene=GOT1</a>           |
| CYLD      | CYLD Lysine 63 Deubiquitinase                                                | Protein Coding | 50 | GC16P050742 | 9.901107788 | <a href="https://www.genecards.org/cgi-bin/carddisp.pl?gene=CYLD">https://www.genecards.org/cgi-bin/carddisp.pl?gene=CYLD</a>           |
| WWTR1     | WW Domain Containing Transcription Regulator 1                               | Protein Coding | 43 | GC03M149517 | 9.89236927  | <a href="https://www.genecards.org/cgi-bin/carddisp.pl?gene=WWTR1">https://www.genecards.org/cgi-bin/carddisp.pl?gene=WWTR1</a>         |
| AOC3      | Amine Oxidase Copper Containing 3                                            | Protein Coding | 44 | GC17P042851 | 9.871923447 | <a href="https://www.genecards.org/cgi-bin/carddisp.pl?gene=AOC3">https://www.genecards.org/cgi-bin/carddisp.pl?gene=AOC3</a>           |
| AZGP1     | Alpha-2-Glycoprotein 1, Zinc-Binding                                         | Protein Coding | 44 | GC07M099967 | 9.869994164 | <a href="https://www.genecards.org/cgi-bin/carddisp.pl?gene=AZGP1">https://www.genecards.org/cgi-bin/carddisp.pl?gene=AZGP1</a>         |
| SLC25A12  | Solute Carrier Family 25 Member 12                                           | Protein Coding | 47 | GC02M171783 | 9.854891777 | <a href="https://www.genecards.org/cgi-bin/carddisp.pl?gene=SLC25A12">https://www.genecards.org/cgi-bin/carddisp.pl?gene=SLC25A12</a>   |
| CFL1      | Cofilin 1                                                                    | Protein Coding | 47 | GC11M065823 | 9.842188835 | <a href="https://www.genecards.org/cgi-bin/carddisp.pl?gene=CFL1">https://www.genecards.org/cgi-bin/carddisp.pl?gene=CFL1</a>           |
| TMPO      | Thymopoietin                                                                 | Protein Coding | 45 | GC12P098515 | 9.820468903 | <a href="https://www.genecards.org/cgi-bin/carddisp.pl?gene=TMPO">https://www.genecards.org/cgi-bin/carddisp.pl?gene=TMPO</a>           |
| PARVB     | Parvin Beta                                                                  | Protein Coding | 40 | GC22P043999 | 9.806926727 | <a href="https://www.genecards.org/cgi-bin/carddisp.pl?gene=PARVB">https://www.genecards.org/cgi-bin/carddisp.pl?gene=PARVB</a>         |
| BID       | BH3 Interacting Domain Death Agonist                                         | Protein Coding | 46 | GC22M017734 | 9.798443794 | <a href="https://www.genecards.org/cgi-bin/carddisp.pl?gene=BID">https://www.genecards.org/cgi-bin/carddisp.pl?gene=BID</a>             |
| APLN      | Apolin                                                                       | Protein Coding | 37 | GC0XM129645 | 9.749046326 | <a href="https://www.genecards.org/cgi-bin/carddisp.pl?gene=APLN">https://www.genecards.org/cgi-bin/carddisp.pl?gene=APLN</a>           |
| NCAN      | Neurocan                                                                     | Protein Coding | 41 | GC19P026662 | 9.744245529 | <a href="https://www.genecards.org/cgi-bin/carddisp.pl?gene=NCAN">https://www.genecards.org/cgi-bin/carddisp.pl?gene=NCAN</a>           |
| SLC9A9    | Solute Carrier Family 9 Member A9                                            | Protein Coding | 40 | GC03M143265 | 9.692720413 | <a href="https://www.genecards.org/cgi-bin/carddisp.pl?gene=SLC9A9">https://www.genecards.org/cgi-bin/carddisp.pl?gene=SLC9A9</a>       |
| PER2      | Period Circadian Regulator 2                                                 | Protein Coding | 44 | GC02M238244 | 9.684893608 | <a href="https://www.genecards.org/cgi-bin/carddisp.pl?gene=PER2">https://www.genecards.org/cgi-bin/carddisp.pl?gene=PER2</a>           |
| COL13A1   | Collagen Type XIII Alpha 1 Chain                                             | Protein Coding | 41 | GC10P069801 | 9.676892281 | <a href="https://www.genecards.org/cgi-bin/carddisp.pl?gene=COL13A1">https://www.genecards.org/cgi-bin/carddisp.pl?gene=COL13A1</a>     |
| ALDH9A1   | Aldehyde Dehydrogenase 9 Family Member A1                                    | Protein Coding | 42 | GC01M165670 | 9.67175064  | <a href="https://www.genecards.org/cgi-bin/carddisp.pl?gene=ALDH9A1">https://www.genecards.org/cgi-bin/carddisp.pl?gene=ALDH9A1</a>     |
| GLP1R     | Glucagon Like Peptide 1 Receptor                                             | Protein Coding | 47 | GC06P039048 | 9.635458946 | <a href="https://www.genecards.org/cgi-bin/carddisp.pl?gene=GLP1R">https://www.genecards.org/cgi-bin/carddisp.pl?gene=GLP1R</a>         |
| CD82      | CD82 Molecule                                                                | Protein Coding | 43 | GC11P044586 | 9.633619308 | <a href="https://www.genecards.org/cgi-bin/carddisp.pl?gene=CD82">https://www.genecards.org/cgi-bin/carddisp.pl?gene=CD82</a>           |
| TYSD1     | Tyrosinase Like Peroxisomal Matrix                                           | Protein Coding | 35 | GC10M070137 | 9.625871658 | <a href="https://www.genecards.org/cgi-bin/carddisp.pl?gene=TYSD1">https://www.genecards.org/cgi-bin/carddisp.pl?gene=TYSD1</a>         |
| FOXA1     | Forkhead Box A1                                                              | Protein Coding | 43 | GC14M037589 | 9.614583969 | <a href="https://www.genecards.org/cgi-bin/carddisp.pl?gene=FOXA1">https://www.genecards.org/cgi-bin/carddisp.pl?gene=FOXA1</a>         |
| PLIN5     | Perilipin 5                                                                  | Protein Coding | 33 | GC19M004522 | 9.6139431   | <a href="https://www.genecards.org/cgi-bin/carddisp.pl?gene=PLIN5">https://www.genecards.org/cgi-bin/carddisp.pl?gene=PLIN5</a>         |
| DISC1     | DISC1 Scaffold Protein                                                       | Protein Coding | 44 | GC01P231626 | 9.609996796 | <a href="https://www.genecards.org/cgi-bin/carddisp.pl?gene=DISC1">https://www.genecards.org/cgi-bin/carddisp.pl?gene=DISC1</a>         |
| COMMD1    | Copper Metabolism Domain Containing 1                                        | Protein Coding | 43 | GC02P061888 | 9.602817535 | <a href="https://www.genecards.org/cgi-bin/carddisp.pl?gene=COMMD1">https://www.genecards.org/cgi-bin/carddisp.pl?gene=COMMD1</a>       |
| EFTUD2    | Elongation Factor Tu GTP Binding Domain Containing 2                         | Protein Coding | 43 | GC17M044852 | 9.594213486 | <a href="https://www.genecards.org/cgi-bin/carddisp.pl?gene=EFTUD2">https://www.genecards.org/cgi-bin/carddisp.pl?gene=EFTUD2</a>       |
| PDXK      | Pyridoxal Kinase                                                             | Protein Coding | 49 | GC21P043719 | 9.578528404 | <a href="https://www.genecards.org/cgi-bin/carddisp.pl?gene=PDXK">https://www.genecards.org/cgi-bin/carddisp.pl?gene=PDXK</a>           |
| CDH4      | Cadherin 4                                                                   | Protein Coding | 43 | GC20P061252 | 9.577430725 | <a href="https://www.genecards.org/cgi-bin/carddisp.pl?gene=CDH4">https://www.genecards.org/cgi-bin/carddisp.pl?gene=CDH4</a>           |
| GPI       | Glucose-6-Phosphate Isomerase                                                | Protein Coding | 47 | GC19P034359 | 9.558523178 | <a href="https://www.genecards.org/cgi-bin/carddisp.pl?gene=GPI">https://www.genecards.org/cgi-bin/carddisp.pl?gene=GPI</a>             |
| YWHAE     | Tyrosine 3-Monooxygenase/Tryptophan 5-Monooxygenase Activation Protein       | Protein Coding | 50 | GC17M001346 | 9.536681175 | <a href="https://www.genecards.org/cgi-bin/carddisp.pl?gene=YWHAE">https://www.genecards.org/cgi-bin/carddisp.pl?gene=YWHAE</a>         |
| SLC1A3    | Solute Carrier Family 1 Member 3                                             | Protein Coding | 51 | GC05P036620 | 9.508004189 | <a href="https://www.genecards.org/cgi-bin/carddisp.pl?gene=SLC1A3">https://www.genecards.org/cgi-bin/carddisp.pl?gene=SLC1A3</a>       |
| COX7B     | Cytochrome C Oxidase Subunit 7B                                              | Protein Coding | 41 | GC0XP077899 | 9.46569252  | <a href="https://www.genecards.org/cgi-bin/carddisp.pl?gene=COX7B">https://www.genecards.org/cgi-bin/carddisp.pl?gene=COX7B</a>         |
| CYP8B1    | Cytochrome P450 Family 8 Subfamily B Member 1                                | Protein Coding | 41 | GC03M042856 | 9.457562447 | <a href="https://www.genecards.org/cgi-bin/carddisp.pl?gene=CYP8B1">https://www.genecards.org/cgi-bin/carddisp.pl?gene=CYP8B1</a>       |
| ITPR2     | Inositol 1,4,5-Trisphosphate Receptor                                        | Protein Coding | 47 | GC12M026336 | 9.429243088 | <a href="https://www.genecards.org/cgi-bin/carddisp.pl?gene=ITPR2">https://www.genecards.org/cgi-bin/carddisp.pl?gene=ITPR2</a>         |
| TRAP1     | TNF Receptor Associated Protein 1                                            | Protein Coding | 44 | GC16M003667 | 9.409546852 | <a href="https://www.genecards.org/cgi-bin/carddisp.pl?gene=TRAP1">https://www.genecards.org/cgi-bin/carddisp.pl?gene=TRAP1</a>         |
| MIR103A1  | MicroRNA 103a-1                                                              | RNA Gene       | 18 | GC05M168560 | 9.403093338 | <a href="https://www.genecards.org/cgi-bin/carddisp.pl?gene=MIR103A1">https://www.genecards.org/cgi-bin/carddisp.pl?gene=MIR103A1</a>   |
| YWHAQ     | Tyrosine 3-Monooxygenase/Tryptophan 5-Monooxygenase Activation Protein Theta | Protein Coding | 48 | GC02M009583 | 9.393497467 | <a href="https://www.genecards.org/cgi-bin/carddisp.pl?gene=YWHAQ">https://www.genecards.org/cgi-bin/carddisp.pl?gene=YWHAQ</a>         |
| PRKAG1    | Protein Kinase AMP-Activated Non-Catalytic Subunit Gamma 1                   | Protein Coding | 49 | GC12M049002 | 9.357595444 | <a href="https://www.genecards.org/cgi-bin/carddisp.pl?gene=PRKAG1">https://www.genecards.org/cgi-bin/carddisp.pl?gene=PRKAG1</a>       |
| MYH10     | Myosin Heavy Chain 10                                                        | Protein Coding | 47 | GC17M008474 | 9.353853226 | <a href="https://www.genecards.org/cgi-bin/carddisp.pl?gene=MYH10">https://www.genecards.org/cgi-bin/carddisp.pl?gene=MYH10</a>         |
| CXCR5     | C-X-C Motif Chemokine Receptor 5                                             | Protein Coding | 42 | GC11P118908 | 9.32213974  | <a href="https://www.genecards.org/cgi-bin/carddisp.pl?gene=CXCR5">https://www.genecards.org/cgi-bin/carddisp.pl?gene=CXCR5</a>         |
| YY1       | YY1 Transcription Factor                                                     | Protein Coding | 48 | GC14P100238 | 9.321865082 | <a href="https://www.genecards.org/cgi-bin/carddisp.pl?gene=YY1">https://www.genecards.org/cgi-bin/carddisp.pl?gene=YY1</a>             |
| PIN1      | Peptidylprolyl Cis/Trans Isomerase, NIMA-Interacting 1                       | Protein Coding | 48 | GC19P009835 | 9.319272995 | <a href="https://www.genecards.org/cgi-bin/carddisp.pl?gene=PIN1">https://www.genecards.org/cgi-bin/carddisp.pl?gene=PIN1</a>           |
| PRKDC     | Protein Kinase, DNA-Activated, Catalytic Subunit                             | Protein Coding | 50 | GC08M047773 | 9.275913239 | <a href="https://www.genecards.org/cgi-bin/carddisp.pl?gene=PRKDC">https://www.genecards.org/cgi-bin/carddisp.pl?gene=PRKDC</a>         |
| XRCC6     | X-Ray Repair Cross Complementing 6                                           | Protein Coding | 47 | GC22P041622 | 9.273457527 | <a href="https://www.genecards.org/cgi-bin/carddisp.pl?gene=XRCC6">https://www.genecards.org/cgi-bin/carddisp.pl?gene=XRCC6</a>         |
| CASP2     | Caspase 2                                                                    | Protein Coding | 50 | GC07P145813 | 9.271942139 | <a href="https://www.genecards.org/cgi-bin/carddisp.pl?gene=CASP2">https://www.genecards.org/cgi-bin/carddisp.pl?gene=CASP2</a>         |
| EEA1      | Early Endosome Antigen 1                                                     | Protein Coding | 44 | GC12M092770 | 9.25849247  | <a href="https://www.genecards.org/cgi-bin/carddisp.pl?gene=EEA1">https://www.genecards.org/cgi-bin/carddisp.pl?gene=EEA1</a>           |
| CDH5      | Cadherin 5                                                                   | Protein Coding | 48 | GC16P066366 | 9.249822617 | <a href="https://www.genecards.org/cgi-bin/carddisp.pl?gene=CDH5">https://www.genecards.org/cgi-bin/carddisp.pl?gene=CDH5</a>           |
| UQCRC1    | Ubiquinol-Cytochrome C Reductase Core Protein 1                              | Protein Coding | 44 | GC03M048598 | 9.242477417 | <a href="https://www.genecards.org/cgi-bin/carddisp.pl?gene=UQCRC1">https://www.genecards.org/cgi-bin/carddisp.pl?gene=UQCRC1</a>       |
| HSD17B13  | Hydroxysteroid 17-Beta Dehydrogenase 13                                      | Protein Coding | 37 | GC04M087303 | 9.22826767  | <a href="https://www.genecards.org/cgi-bin/carddisp.pl?gene=HSD17B13">https://www.genecards.org/cgi-bin/carddisp.pl?gene=HSD17B13</a>   |
| PTPRD     | Protein Tyrosine Phosphatase Receptor Type D                                 | Protein Coding | 45 | GC09M008307 | 9.208004951 | <a href="https://www.genecards.org/cgi-bin/carddisp.pl?gene=PTPRD">https://www.genecards.org/cgi-bin/carddisp.pl?gene=PTPRD</a>         |
| RPL10     | Ribosomal Protein L10                                                        | Protein Coding | 45 | GC0XP154389 | 9.195249557 | <a href="https://www.genecards.org/cgi-bin/carddisp.pl?gene=RPL10">https://www.genecards.org/cgi-bin/carddisp.pl?gene=RPL10</a>         |
| HPS1      | HPS1 Biogenesis Of Lysosomal Organelles Complex 3 Subunit 1                  | Protein Coding | 43 | GC10M098416 | 9.152247429 | <a href="https://www.genecards.org/cgi-bin/carddisp.pl?gene=HPS1">https://www.genecards.org/cgi-bin/carddisp.pl?gene=HPS1</a>           |
| RPS15     | Ribosomal Protein S15                                                        | Protein Coding | 41 | GC19P001438 | 9.122495651 | <a href="https://www.genecards.org/cgi-bin/carddisp.pl?gene=RPS15">https://www.genecards.org/cgi-bin/carddisp.pl?gene=RPS15</a>         |
| AXL       | AXL Receptor Tyrosine Kinase                                                 | Protein Coding | 52 | GC19P041219 | 9.080257416 | <a href="https://www.genecards.org/cgi-bin/carddisp.pl?gene=AXL">https://www.genecards.org/cgi-bin/carddisp.pl?gene=AXL</a>             |
| NCOA3     | Nuclear Receptor Coactivator 3                                               | Protein Coding | 47 | GC20P047501 | 9.04309082  | <a href="https://www.genecards.org/cgi-bin/carddisp.pl?gene=NCOA3">https://www.genecards.org/cgi-bin/carddisp.pl?gene=NCOA3</a>         |
| SLC39A4   | Solute Carrier Family 39 Member 4                                            | Protein Coding | 44 | GC08M144409 | 9.026463509 | <a href="https://www.genecards.org/cgi-bin/carddisp.pl?gene=SLC39A4">https://www.genecards.org/cgi-bin/carddisp.pl?gene=SLC39A4</a>     |
| SLC4A4    | Solute Carrier Family 4 Member 4                                             | Protein Coding | 47 | GC04P071063 | 9.012678146 | <a href="https://www.genecards.org/cgi-bin/carddisp.pl?gene=SLC4A4">https://www.genecards.org/cgi-bin/carddisp.pl?gene=SLC4A4</a>       |
| SIRT6     | Sirtuin 6                                                                    | Protein Coding | 47 | GC19M004174 | 9.008852959 | <a href="https://www.genecards.org/cgi-bin/carddisp.pl?gene=SIRT6">https://www.genecards.org/cgi-bin/carddisp.pl?gene=SIRT6</a>         |
| SLC25A22  | Solute Carrier Family 25 Member 22                                           | Protein Coding | 41 | GC11M001138 | 9.001564026 | <a href="https://www.genecards.org/cgi-bin/carddisp.pl?gene=SLC25A22">https://www.genecards.org/cgi-bin/carddisp.pl?gene=SLC25A22</a>   |
| TNFRSF4   | TNF Receptor Superfamily Member 4                                            | Protein Coding | 43 | GC01M001211 | 8.997526169 | <a href="https://www.genecards.org/cgi-bin/carddisp.pl?gene=TNFRSF4">https://www.genecards.org/cgi-bin/carddisp.pl?gene=TNFRSF4</a>     |
| EDA       | Ectodysplasin A                                                              | Protein Coding | 41 | GC0XP066918 | 8.956465721 | <a href="https://www.genecards.org/cgi-bin/carddisp.pl?gene=EDA">https://www.genecards.org/cgi-bin/carddisp.pl?gene=EDA</a>             |
| ADRB1     | Adrenoceptor Beta 1                                                          | Protein Coding | 49 | GC10P114044 | 8.924825668 | <a href="https://www.genecards.org/cgi-bin/carddisp.pl?gene=ADRB1">https://www.genecards.org/cgi-bin/carddisp.pl?gene=ADRB1</a>         |
| XRCC5     | X-Ray Repair Cross Complementing 5                                           | Protein Coding | 45 | GC02P216107 | 8.907269478 | <a href="https://www.genecards.org/cgi-bin/carddisp.pl?gene=XRCC5">https://www.genecards.org/cgi-bin/carddisp.pl?gene=XRCC5</a>         |
| SAMM50    | SAMM50 Sorting And Assembly Machinery Component                              | Protein Coding | 38 | GC22P043955 | 8.895086288 | <a href="https://www.genecards.org/cgi-bin/carddisp.pl?gene=SAMM50">https://www.genecards.org/cgi-bin/carddisp.pl?gene=SAMM50</a>       |
| IMMT      | Inner Membrane Mitochondrial Protein                                         | Protein Coding | 40 | GC02M086144 | 8.849901199 | <a href="https://www.genecards.org/cgi-bin/carddisp.pl?gene=IMMT">https://www.genecards.org/cgi-bin/carddisp.pl?gene=IMMT</a>           |
| SIK1      | Salt Inducible Kinase 1                                                      | Protein Coding | 47 | GC21M043414 | 8.841324806 | <a href="https://www.genecards.org/cgi-bin/carddisp.pl?gene=SIK1">https://www.genecards.org/cgi-bin/carddisp.pl?gene=SIK1</a>           |
| ALPI      | Alkaline Phosphatase, Intestinal                                             | Protein Coding | 44 | GC02P232456 | 8.8091259   | <a href="https://www.genecards.org/cgi-bin/carddisp.pl?gene=ALPI">https://www.genecards.org/cgi-bin/carddisp.pl?gene=ALPI</a>           |
| ERLIN2    | ER Lipid Raft Associated 2                                                   | Protein Coding | 41 | GC08P037736 | 8.78717001  | <a href="https://www.genecards.org/cgi-bin/carddisp.pl?gene=ERLIN2">https://www.genecards.org/cgi-bin/carddisp.pl?gene=ERLIN2</a>       |
| CHRM3     | Cholinergic Receptor Muscarinic 3                                            | Protein Coding | 50 | GC01P239386 | 8.779540062 | <a href="https://www.genecards.org/cgi-bin/carddisp.pl?gene=CHRM3">https://www.genecards.org/cgi-bin/carddisp.pl?gene=CHRM3</a>         |
| LCN1      | Lipocalin 1                                                                  | Protein Coding | 40 | GC09P135521 | 8.770139694 | <a href="https://www.genecards.org/cgi-bin/carddisp.pl?gene=LCN1">https://www.genecards.org/cgi-bin/carddisp.pl?gene=LCN1</a>           |
| SERPINA12 | Serpin Family A Member 12                                                    | Protein Coding | 38 | GC14M095825 | 8.757614136 | <a href="https://www.genecards.org/cgi-bin/carddisp.pl?gene=SERPINA12">https://www.genecards.org/cgi-bin/carddisp.pl?gene=SERPINA12</a> |
| CLDN2     | Claudin 2                                                                    | Protein Coding | 42 | GC0XP106900 | 8.728883743 | <a href="https://www.genecards.org/cgi-bin/carddisp.pl?gene=CLDN2">https://www.genecards.org/cgi-bin/carddisp.pl?gene=CLDN2</a>         |
| TXNRD1    | Thioredoxin Reductase 1                                                      | Protein Coding | 48 | GC12P104215 | 8.722616196 | <a href="https://www.genecards.org/cgi-bin/carddisp.pl?gene=TXNRD1">https://www.genecards.org/cgi-bin/carddisp.pl?gene=TXNRD1</a>       |
| NAT1      | N-Acetyltransferase 1                                                        | Protein Coding | 45 | GC08P018179 | 8.714513779 | <a href="https://www.genecards.org/cgi-bin/carddisp.pl?gene=NAT1">https://www.genecards.org/cgi-bin/carddisp.pl?gene=NAT1</a>           |
| SLC34A2   | Solute Carrier Family 34 Member 2                                            | Protein Coding | 47 | GC04P025657 | 8.712742805 | <a href="https://www.genecards.org/cgi-bin/carddisp.pl?gene=SLC34A2">https://www.genecards.org/cgi-bin/carddisp.pl?gene=SLC34A2</a>     |
| MIR363    | MicroRNA 363                                                                 | RNA Gene       | 15 | GC0XM134205 | 8.698446274 | <a href="https://www.genecards.org/cgi-bin/carddisp.pl?gene=MIR363">https://www.genecards.org/cgi-bin/carddisp.pl?gene=MIR363</a>       |

|               |                                                                                        |                   |    |             |             |                                                                                                                                                 |
|---------------|----------------------------------------------------------------------------------------|-------------------|----|-------------|-------------|-------------------------------------------------------------------------------------------------------------------------------------------------|
| EEF1A1        | Eukaryotic Translation Elongation Factor 1 Alpha 1                                     | Protein Coding    | 44 | GC06M073515 | 8.65370369  | <a href="https://www.genecards.org/cgi-bin/carddisp.pl?gene=EEF1A1">https://www.genecards.org/cgi-bin/carddisp.pl?gene=EEF1A1</a>               |
| PRKACG        | Protein Kinase CAMP-Activated Catalytic Subunit Gamma                                  | Protein Coding    | 48 | GC09M069013 | 8.649134636 | <a href="https://www.genecards.org/cgi-bin/carddisp.pl?gene=PRKACG">https://www.genecards.org/cgi-bin/carddisp.pl?gene=PRKACG</a>               |
| CXCL11        | C-X-C Motif Chemokine Ligand 11                                                        | Protein Coding    | 41 | GC04M076033 | 8.647530556 | <a href="https://www.genecards.org/cgi-bin/carddisp.pl?gene=CXCL11">https://www.genecards.org/cgi-bin/carddisp.pl?gene=CXCL11</a>               |
| TNC           | Tenascin C                                                                             | Protein Coding    | 50 | GC09M115019 | 8.615830421 | <a href="https://www.genecards.org/cgi-bin/carddisp.pl?gene=TNC">https://www.genecards.org/cgi-bin/carddisp.pl?gene=TNC</a>                     |
| AKR1B10       | Aldo-Keto Reductase Family 1 Member                                                    | Protein Coding    | 44 | GC07P134527 | 8.546919823 | <a href="https://www.genecards.org/cgi-bin/carddisp.pl?gene=AKR1B10">https://www.genecards.org/cgi-bin/carddisp.pl?gene=AKR1B10</a>             |
| OPRM1         | Opioid Receptor Mu 1                                                                   | Protein Coding    | 49 | GC06P154075 | 8.530946732 | <a href="https://www.genecards.org/cgi-bin/carddisp.pl?gene=OPRM1">https://www.genecards.org/cgi-bin/carddisp.pl?gene=OPRM1</a>                 |
| RPS17         | Ribosomal Protein S17                                                                  | Protein Coding    | 43 | GC15M082536 | 8.52791214  | <a href="https://www.genecards.org/cgi-bin/carddisp.pl?gene=RPS17">https://www.genecards.org/cgi-bin/carddisp.pl?gene=RPS17</a>                 |
| GPNMB         | Glycoprotein Nmb                                                                       | Protein Coding    | 44 | GC07P023238 | 8.51955986  | <a href="https://www.genecards.org/cgi-bin/carddisp.pl?gene=GPNMB">https://www.genecards.org/cgi-bin/carddisp.pl?gene=GPNMB</a>                 |
| ITLN1         | Intelectin 1                                                                           | Protein Coding    | 39 | GC01M160876 | 8.504840851 | <a href="https://www.genecards.org/cgi-bin/carddisp.pl?gene=ITLN1">https://www.genecards.org/cgi-bin/carddisp.pl?gene=ITLN1</a>                 |
| PPIB          | Peptidylprolyl Isomerase B                                                             | Protein Coding    | 50 | GC15M064155 | 8.407612801 | <a href="https://www.genecards.org/cgi-bin/carddisp.pl?gene=PPIB">https://www.genecards.org/cgi-bin/carddisp.pl?gene=PPIB</a>                   |
| GPC6          | Glypican 6                                                                             | Protein Coding    | 44 | GC13P093226 | 8.397035599 | <a href="https://www.genecards.org/cgi-bin/carddisp.pl?gene=GPC6">https://www.genecards.org/cgi-bin/carddisp.pl?gene=GPC6</a>                   |
| PRKAB2        | Protein Kinase AMP-Activated Non-Catalytic Subunit Beta 2                              | Protein Coding    | 47 | GC01M147155 | 8.382809639 | <a href="https://www.genecards.org/cgi-bin/carddisp.pl?gene=PRKAB2">https://www.genecards.org/cgi-bin/carddisp.pl?gene=PRKAB2</a>               |
| APOF          | Apolipoprotein F                                                                       | Protein Coding    | 39 | GC12M056371 | 8.347465515 | <a href="https://www.genecards.org/cgi-bin/carddisp.pl?gene=APOF">https://www.genecards.org/cgi-bin/carddisp.pl?gene=APOF</a>                   |
| EIF3F         | Eukaryotic Translation Initiation Factor 3 Subunit F                                   | Protein Coding    | 44 | GC11P007966 | 8.335307121 | <a href="https://www.genecards.org/cgi-bin/carddisp.pl?gene=EIF3F">https://www.genecards.org/cgi-bin/carddisp.pl?gene=EIF3F</a>                 |
| CISD2         | CDGSH Iron Sulfur Domain 2                                                             | Protein Coding    | 42 | GC04P102868 | 8.319753647 | <a href="https://www.genecards.org/cgi-bin/carddisp.pl?gene=CISD2">https://www.genecards.org/cgi-bin/carddisp.pl?gene=CISD2</a>                 |
| TRAF2         | TNF Receptor Associated Factor 2                                                       | Protein Coding    | 45 | GC09P136881 | 8.298054695 | <a href="https://www.genecards.org/cgi-bin/carddisp.pl?gene=TRAF2">https://www.genecards.org/cgi-bin/carddisp.pl?gene=TRAF2</a>                 |
| HSP90B1       | Heat Shock Protein 90 Beta Family Member 1                                             | Protein Coding    | 47 | GC12P103930 | 8.281648636 | <a href="https://www.genecards.org/cgi-bin/carddisp.pl?gene=HSP90B1">https://www.genecards.org/cgi-bin/carddisp.pl?gene=HSP90B1</a>             |
| MYO6          | Myosin VI                                                                              | Protein Coding    | 47 | GC06P075749 | 8.277293205 | <a href="https://www.genecards.org/cgi-bin/carddisp.pl?gene=MYO6">https://www.genecards.org/cgi-bin/carddisp.pl?gene=MYO6</a>                   |
| MOGAT2        | Monoacylglycerol O-Acyltransferase 2                                                   | Protein Coding    | 38 | GC11P075717 | 8.266434669 | <a href="https://www.genecards.org/cgi-bin/carddisp.pl?gene=MOGAT2">https://www.genecards.org/cgi-bin/carddisp.pl?gene=MOGAT2</a>               |
| GRK2          | G Protein-Coupled Receptor Kinase 2                                                    | Protein Coding    | 38 | GC11P067266 | 8.264247894 | <a href="https://www.genecards.org/cgi-bin/carddisp.pl?gene=GRK2">https://www.genecards.org/cgi-bin/carddisp.pl?gene=GRK2</a>                   |
| NDUFA4        | NDUFA4 Mitochondrial Complex                                                           | Protein Coding    | 44 | GC07M010938 | 8.262947083 | <a href="https://www.genecards.org/cgi-bin/carddisp.pl?gene=NDUFA4">https://www.genecards.org/cgi-bin/carddisp.pl?gene=NDUFA4</a>               |
| FUNDC2        | FUN14 Domain Containing 2                                                              | Protein Coding    | 35 | GC0XP155025 | 8.254704475 | <a href="https://www.genecards.org/cgi-bin/carddisp.pl?gene=FUNDC2">https://www.genecards.org/cgi-bin/carddisp.pl?gene=FUNDC2</a>               |
| SNTA1         | Syntrophin Alpha 1                                                                     | Protein Coding    | 45 | GC20M033407 | 8.232112885 | <a href="https://www.genecards.org/cgi-bin/carddisp.pl?gene=SNTA1">https://www.genecards.org/cgi-bin/carddisp.pl?gene=SNTA1</a>                 |
| AMPH          | Amphiphysin                                                                            | Protein Coding    | 45 | GC07M038782 | 8.201856613 | <a href="https://www.genecards.org/cgi-bin/carddisp.pl?gene=AMPH">https://www.genecards.org/cgi-bin/carddisp.pl?gene=AMPH</a>                   |
| ZNF365        | Zinc Finger Protein 365                                                                | Protein Coding    | 38 | GC10P062374 | 8.189241409 | <a href="https://www.genecards.org/cgi-bin/carddisp.pl?gene=ZNF365">https://www.genecards.org/cgi-bin/carddisp.pl?gene=ZNF365</a>               |
| NDUFC2-KCTD14 | NDUFC2-KCTD14 Readthrough                                                              | Protein Coding    | 22 | GC11M078015 | 8.181237221 | <a href="https://www.genecards.org/cgi-bin/carddisp.pl?gene=NDUFC2-KCTD14">https://www.genecards.org/cgi-bin/carddisp.pl?gene=NDUFC2-KCTD14</a> |
| AHNAK         | AHNAK Nucleoprotein                                                                    | Protein Coding    | 37 | GC11M069238 | 8.172440529 | <a href="https://www.genecards.org/cgi-bin/carddisp.pl?gene=AHNAK">https://www.genecards.org/cgi-bin/carddisp.pl?gene=AHNAK</a>                 |
| CCN1          | Cellular Communication Network Factor 1                                                | Protein Coding    | 31 | GC01P085581 | 8.171933174 | <a href="https://www.genecards.org/cgi-bin/carddisp.pl?gene=CCN1">https://www.genecards.org/cgi-bin/carddisp.pl?gene=CCN1</a>                   |
| MIR361        | MicroRNA 361                                                                           | RNA Gene          | 16 | GC0XM085903 | 8.155086517 | <a href="https://www.genecards.org/cgi-bin/carddisp.pl?gene=MIR361">https://www.genecards.org/cgi-bin/carddisp.pl?gene=MIR361</a>               |
| NRG3          | Neuregulin 3                                                                           | Protein Coding    | 43 | GC10P085390 | 8.129633904 | <a href="https://www.genecards.org/cgi-bin/carddisp.pl?gene=NRG3">https://www.genecards.org/cgi-bin/carddisp.pl?gene=NRG3</a>                   |
| ARNT          | Aryl Hydrocarbon Receptor Nuclear Translocator                                         | Protein Coding    | 44 | GC01M150809 | 8.125787735 | <a href="https://www.genecards.org/cgi-bin/carddisp.pl?gene=ARNT">https://www.genecards.org/cgi-bin/carddisp.pl?gene=ARNT</a>                   |
| DMGDH         | Dimethylglycine Dehydrogenase                                                          | Protein Coding    | 44 | GC05M078997 | 8.077875137 | <a href="https://www.genecards.org/cgi-bin/carddisp.pl?gene=DMGDH">https://www.genecards.org/cgi-bin/carddisp.pl?gene=DMGDH</a>                 |
| PSMC2         | Proteasome 26S Subunit, ATPase 2                                                       | Protein Coding    | 41 | GC07P103344 | 8.034032822 | <a href="https://www.genecards.org/cgi-bin/carddisp.pl?gene=PSMC2">https://www.genecards.org/cgi-bin/carddisp.pl?gene=PSMC2</a>                 |
| KAT5          | Lysine Acetyltransferase 5                                                             | Protein Coding    | 47 | GC11P065711 | 8.023927689 | <a href="https://www.genecards.org/cgi-bin/carddisp.pl?gene=KAT5">https://www.genecards.org/cgi-bin/carddisp.pl?gene=KAT5</a>                   |
| YWHAG         | Tyrosine 3-Monoxygenase/Tryptophan 5-Monoxygenase Activation Protein                   | Protein Coding    | 50 | GC07M076327 | 8.020187378 | <a href="https://www.genecards.org/cgi-bin/carddisp.pl?gene=YWHAG">https://www.genecards.org/cgi-bin/carddisp.pl?gene=YWHAG</a>                 |
| MACROD2       | Mono-ADP Ribosylhydrolase 2                                                            | Protein Coding    | 36 | GC20P013925 | 8.018939972 | <a href="https://www.genecards.org/cgi-bin/carddisp.pl?gene=MACROD2">https://www.genecards.org/cgi-bin/carddisp.pl?gene=MACROD2</a>             |
| SLC44A1       | Solute Carrier Family 44 Member 1                                                      | Protein Coding    | 45 | GC09P105244 | 8.014473915 | <a href="https://www.genecards.org/cgi-bin/carddisp.pl?gene=SLC44A1">https://www.genecards.org/cgi-bin/carddisp.pl?gene=SLC44A1</a>             |
| CCT5          | Chaperonin Containing TCP1 Subunit 5                                                   | Protein Coding    | 45 | GC05P010236 | 7.981685638 | <a href="https://www.genecards.org/cgi-bin/carddisp.pl?gene=CCT5">https://www.genecards.org/cgi-bin/carddisp.pl?gene=CCT5</a>                   |
| IL27          | Interleukin 27                                                                         | Protein Coding    | 38 | GC16M028514 | 7.952753544 | <a href="https://www.genecards.org/cgi-bin/carddisp.pl?gene=IL27">https://www.genecards.org/cgi-bin/carddisp.pl?gene=IL27</a>                   |
| MIR590        | MicroRNA 590                                                                           | RNA Gene          | 18 | GC07P074191 | 7.944304466 | <a href="https://www.genecards.org/cgi-bin/carddisp.pl?gene=MIR590">https://www.genecards.org/cgi-bin/carddisp.pl?gene=MIR590</a>               |
| RPL27         | Ribosomal Protein L27                                                                  | Protein Coding    | 43 | GC17P042998 | 7.942708492 | <a href="https://www.genecards.org/cgi-bin/carddisp.pl?gene=RPL27">https://www.genecards.org/cgi-bin/carddisp.pl?gene=RPL27</a>                 |
| LOXL2         | Lysyl Oxidase Like 2                                                                   | Protein Coding    | 44 | GC08M023296 | 7.93822813  | <a href="https://www.genecards.org/cgi-bin/carddisp.pl?gene=LOXL2">https://www.genecards.org/cgi-bin/carddisp.pl?gene=LOXL2</a>                 |
| TP53BP1       | Tumor Protein P53 Binding Protein 1                                                    | Protein Coding    | 45 | GC15M043403 | 7.923695087 | <a href="https://www.genecards.org/cgi-bin/carddisp.pl?gene=TP53BP1">https://www.genecards.org/cgi-bin/carddisp.pl?gene=TP53BP1</a>             |
| HSPA6         | Heat Shock Protein Family A (Hsp70) Member 6                                           | Protein Coding    | 45 | GC01P161524 | 7.898610115 | <a href="https://www.genecards.org/cgi-bin/carddisp.pl?gene=HSPA6">https://www.genecards.org/cgi-bin/carddisp.pl?gene=HSPA6</a>                 |
| SLC25A47      | Solute Carrier Family 25 Member 47                                                     | Protein Coding    | 35 | GC14P100323 | 7.896558762 | <a href="https://www.genecards.org/cgi-bin/carddisp.pl?gene=SLC25A47">https://www.genecards.org/cgi-bin/carddisp.pl?gene=SLC25A47</a>           |
| SIRT4         | Sirtuin 4                                                                              | Protein Coding    | 40 | GC12P120291 | 7.884446144 | <a href="https://www.genecards.org/cgi-bin/carddisp.pl?gene=SIRT4">https://www.genecards.org/cgi-bin/carddisp.pl?gene=SIRT4</a>                 |
| DCLK1         | Doublecortin Like Kinase 1                                                             | Protein Coding    | 44 | GC13M035768 | 7.845679283 | <a href="https://www.genecards.org/cgi-bin/carddisp.pl?gene=DCLK1">https://www.genecards.org/cgi-bin/carddisp.pl?gene=DCLK1</a>                 |
| IGFBP7        | Insulin Like Growth Factor Binding                                                     | Protein Coding    | 47 | GC04M057030 | 7.816283226 | <a href="https://www.genecards.org/cgi-bin/carddisp.pl?gene=IGFBP7">https://www.genecards.org/cgi-bin/carddisp.pl?gene=IGFBP7</a>               |
| AQP9          | Aquaporin 9                                                                            | Protein Coding    | 44 | GC15P058138 | 7.780819893 | <a href="https://www.genecards.org/cgi-bin/carddisp.pl?gene=AQP9">https://www.genecards.org/cgi-bin/carddisp.pl?gene=AQP9</a>                   |
| DROSHA        | Drosha Ribonuclease III                                                                | Protein Coding    | 43 | GC05M031401 | 7.770452976 | <a href="https://www.genecards.org/cgi-bin/carddisp.pl?gene=DROSHA">https://www.genecards.org/cgi-bin/carddisp.pl?gene=DROSHA</a>               |
| STEAP4        | STEAP4 Metalloreductase                                                                | Protein Coding    | 41 | GC07M088315 | 7.76199007  | <a href="https://www.genecards.org/cgi-bin/carddisp.pl?gene=STEAP4">https://www.genecards.org/cgi-bin/carddisp.pl?gene=STEAP4</a>               |
| TAGLN         | Transgelin                                                                             | Protein Coding    | 44 | GC11P117199 | 7.757493973 | <a href="https://www.genecards.org/cgi-bin/carddisp.pl?gene=TAGLN">https://www.genecards.org/cgi-bin/carddisp.pl?gene=TAGLN</a>                 |
| PZP           | PZP Alpha-2-Macroglobulin Like                                                         | Protein Coding    | 40 | GC12M009148 | 7.755242348 | <a href="https://www.genecards.org/cgi-bin/carddisp.pl?gene=PZP">https://www.genecards.org/cgi-bin/carddisp.pl?gene=PZP</a>                     |
| TL1           | Tollid Like 1                                                                          | Protein Coding    | 44 | GC04P165873 | 7.748857498 | <a href="https://www.genecards.org/cgi-bin/carddisp.pl?gene=TL1">https://www.genecards.org/cgi-bin/carddisp.pl?gene=TL1</a>                     |
| IGFBP5        | Insulin Like Growth Factor Binding                                                     | Protein Coding    | 43 | GC02M216672 | 7.71900034  | <a href="https://www.genecards.org/cgi-bin/carddisp.pl?gene=IGFBP5">https://www.genecards.org/cgi-bin/carddisp.pl?gene=IGFBP5</a>               |
| PRSS2         | Serine Protease 2                                                                      | Protein Coding    | 41 | GC07P145798 | 7.698745728 | <a href="https://www.genecards.org/cgi-bin/carddisp.pl?gene=PRSS2">https://www.genecards.org/cgi-bin/carddisp.pl?gene=PRSS2</a>                 |
| NFIC          | Nuclear Factor I C                                                                     | Protein Coding    | 41 | GC19P003314 | 7.694828033 | <a href="https://www.genecards.org/cgi-bin/carddisp.pl?gene=NFIC">https://www.genecards.org/cgi-bin/carddisp.pl?gene=NFIC</a>                   |
| TRAF1         | TNF Receptor Associated Factor 1                                                       | Protein Coding    | 44 | GC09M120902 | 7.691432953 | <a href="https://www.genecards.org/cgi-bin/carddisp.pl?gene=TRAF1">https://www.genecards.org/cgi-bin/carddisp.pl?gene=TRAF1</a>                 |
| ATP5F1B       | ATP Synthase F1 Subunit Beta                                                           | Protein Coding    | 34 | GC12M056639 | 7.682571411 | <a href="https://www.genecards.org/cgi-bin/carddisp.pl?gene=ATP5F1B">https://www.genecards.org/cgi-bin/carddisp.pl?gene=ATP5F1B</a>             |
| RBFOX1        | RNA Binding Fox-1 Homolog 1                                                            | Protein Coding    | 38 | GC16P005688 | 7.667833805 | <a href="https://www.genecards.org/cgi-bin/carddisp.pl?gene=RBFOX1">https://www.genecards.org/cgi-bin/carddisp.pl?gene=RBFOX1</a>               |
| PPP2CA        | Protein Phosphatase 2 Catalytic Subunit Alpha                                          | Protein Coding    | 50 | GC05M134194 | 7.647490513 | <a href="https://www.genecards.org/cgi-bin/carddisp.pl?gene=PPP2CA">https://www.genecards.org/cgi-bin/carddisp.pl?gene=PPP2CA</a>               |
| TSHB          | Thyroid Stimulating Hormone Subunit                                                    | Protein Coding    | 43 | GC01P115029 | 7.626227379 | <a href="https://www.genecards.org/cgi-bin/carddisp.pl?gene=TSHB">https://www.genecards.org/cgi-bin/carddisp.pl?gene=TSHB</a>                   |
| TRAF3         | TNF Receptor Associated Factor 3                                                       | Protein Coding    | 48 | GC14P106036 | 7.617692471 | <a href="https://www.genecards.org/cgi-bin/carddisp.pl?gene=TRAF3">https://www.genecards.org/cgi-bin/carddisp.pl?gene=TRAF3</a>                 |
| SRSF1         | Serine And Arginine Rich Splicing Factor                                               | Protein Coding    | 43 | GC17M058000 | 7.616688728 | <a href="https://www.genecards.org/cgi-bin/carddisp.pl?gene=SRSF1">https://www.genecards.org/cgi-bin/carddisp.pl?gene=SRSF1</a>                 |
| ATAD3A        | ATPase Family AAA Domain Containing Immunoglobulin Heavy Constant Gamma 1 (G1m Marker) | Protein Coding    | 40 | GC01P002047 | 7.607479095 | <a href="https://www.genecards.org/cgi-bin/carddisp.pl?gene=ATAD3A">https://www.genecards.org/cgi-bin/carddisp.pl?gene=ATAD3A</a>               |
| IGHG1         | Immunoglobulin Heavy Constant Gamma 1 (G1m Marker)                                     | Protein Coding    | 33 | GC14M105736 | 7.600393295 | <a href="https://www.genecards.org/cgi-bin/carddisp.pl?gene=IGHG1">https://www.genecards.org/cgi-bin/carddisp.pl?gene=IGHG1</a>                 |
| FST           | Follistatin                                                                            | Protein Coding    | 47 | GC05P053480 | 7.575922966 | <a href="https://www.genecards.org/cgi-bin/carddisp.pl?gene=FST">https://www.genecards.org/cgi-bin/carddisp.pl?gene=FST</a>                     |
| LOC110806262  | Solute Carrier Family 6 Member 4 Gene Promoter                                         | Biological Region | 1  | GC17P030235 | 7.556408882 | <a href="https://www.genecards.org/cgi-bin/carddisp.pl?gene=LOC110806262">https://www.genecards.org/cgi-bin/carddisp.pl?gene=LOC110806262</a>   |
| H4-16         | H4 Histone 16                                                                          | Protein Coding    | 34 | GC12M015752 | 7.543855667 | <a href="https://www.genecards.org/cgi-bin/carddisp.pl?gene=H4-16">https://www.genecards.org/cgi-bin/carddisp.pl?gene=H4-16</a>                 |
| GPT2          | Glutamic--Pyruvic Transaminase 2                                                       | Protein Coding    | 48 | GC16P046885 | 7.525701523 | <a href="https://www.genecards.org/cgi-bin/carddisp.pl?gene=GPT2">https://www.genecards.org/cgi-bin/carddisp.pl?gene=GPT2</a>                   |
| UGDH          | UDP-Glucose 6-Dehydrogenase                                                            | Protein Coding    | 47 | GC04M039502 | 7.50583744  | <a href="https://www.genecards.org/cgi-bin/carddisp.pl?gene=UGDH">https://www.genecards.org/cgi-bin/carddisp.pl?gene=UGDH</a>                   |
| RPS15A        | Ribosomal Protein S15a                                                                 | Protein Coding    | 43 | GC16M018781 | 7.494460106 | <a href="https://www.genecards.org/cgi-bin/carddisp.pl?gene=RPS15A">https://www.genecards.org/cgi-bin/carddisp.pl?gene=RPS15A</a>               |
| PEG10         | Paternally Expressed 10                                                                | Protein Coding    | 41 | GC07P094656 | 7.489383698 | <a href="https://www.genecards.org/cgi-bin/carddisp.pl?gene=PEG10">https://www.genecards.org/cgi-bin/carddisp.pl?gene=PEG10</a>                 |
| DGCR8         | DGCR8 Microprocessor Complex Subunit                                                   | Protein Coding    | 42 | GC22P020080 | 7.487957954 | <a href="https://www.genecards.org/cgi-bin/carddisp.pl?gene=DGCR8">https://www.genecards.org/cgi-bin/carddisp.pl?gene=DGCR8</a>                 |
| OSMR          | Oncostatin M Receptor                                                                  | Protein Coding    | 45 | GC05P038845 | 7.485833645 | <a href="https://www.genecards.org/cgi-bin/carddisp.pl?gene=OSMR">https://www.genecards.org/cgi-bin/carddisp.pl?gene=OSMR</a>                   |
| RPL7          | Ribosomal Protein L7                                                                   | Protein Coding    | 43 | GC08M073290 | 7.477601051 | <a href="https://www.genecards.org/cgi-bin/carddisp.pl?gene=RPL7">https://www.genecards.org/cgi-bin/carddisp.pl?gene=RPL7</a>                   |
| AFAP1-AS1     | AFAP1 Antisense RNA 1                                                                  | RNA Gene          | 16 | GC04P007756 | 7.477543831 | <a href="https://www.genecards.org/cgi-bin/carddisp.pl?gene=AFAP1-AS1">https://www.genecards.org/cgi-bin/carddisp.pl?gene=AFAP1-AS1</a>         |
| AUP1          | AUP1 Lipid Droplet Regulating VLDL Assembly Factor                                     | Protein Coding    | 37 | GC02M074526 | 7.477283478 | <a href="https://www.genecards.org/cgi-bin/carddisp.pl?gene=AUP1">https://www.genecards.org/cgi-bin/carddisp.pl?gene=AUP1</a>                   |
| PUF60         | Poly(U) Binding Splicing Factor 60                                                     | Protein Coding    | 43 | GC08M143816 | 7.477024803 | <a href="https://www.genecards.org/cgi-bin/carddisp.pl?gene=PUF60">https://www.genecards.org/cgi-bin/carddisp.pl?gene=PUF60</a>                 |
| MYH2          | Myosin Heavy Chain 2                                                                   | Protein Coding    | 47 | GC17M010521 | 7.437431335 | <a href="https://www.genecards.org/cgi-bin/carddisp.pl?gene=MYH2">https://www.genecards.org/cgi-bin/carddisp.pl?gene=MYH2</a>                   |
| CD5L          | CD5 Molecule Like                                                                      | Protein Coding    | 39 | GC01M157800 | 7.43599987  | <a href="https://www.genecards.org/cgi-bin/carddisp.pl?gene=CD5L">https://www.genecards.org/cgi-bin/carddisp.pl?gene=CD5L</a>                   |
| MYO1B         | Myosin IB                                                                              | Protein Coding    | 39 | GC02P191246 | 7.431186676 | <a href="https://www.genecards.org/cgi-bin/carddisp.pl?gene=MYO1B">https://www.genecards.org/cgi-bin/carddisp.pl?gene=MYO1B</a>                 |
| ELK1          | ETS Transcription Factor ELK1                                                          | Protein Coding    | 44 | GC0XM047635 | 7.425537109 | <a href="https://www.genecards.org/cgi-bin/carddisp.pl?gene=ELK1">https://www.genecards.org/cgi-bin/carddisp.pl?gene=ELK1</a>                   |
| LGALS3BP      | Galectin 3 Binding Protein                                                             | Protein Coding    | 41 | GC17M078971 | 7.416460991 | <a href="https://www.genecards.org/cgi-bin/carddisp.pl?gene=LGALS3BP">https://www.genecards.org/cgi-bin/carddisp.pl?gene=LGALS3BP</a>           |
| AQP3          | Aquaporin 3 (Gill Blood Group)                                                         | Protein Coding    | 48 | GC09M033431 | 7.314429283 | <a href="https://www.genecards.org/cgi-bin/carddisp.pl?gene=AQP3">https://www.genecards.org/cgi-bin/carddisp.pl?gene=AQP3</a>                   |
| GPLD1         | Glycosylphosphatidylinositol Specific Phospholipase D1                                 | Protein Coding    | 43 | GC06M024438 | 7.307159424 | <a href="https://www.genecards.org/cgi-bin/carddisp.pl?gene=GPLD1">https://www.genecards.org/cgi-bin/carddisp.pl?gene=GPLD1</a>                 |
| GABRA2        | Gamma-Aminobutyric Acid Type A Receptor Subunit Alpha2                                 | Protein Coding    | 47 | GC04M046243 | 7.282387257 | <a href="https://www.genecards.org/cgi-bin/carddisp.pl?gene=GABRA2">https://www.genecards.org/cgi-bin/carddisp.pl?gene=GABRA2</a>               |
| SEMA5A        | Semaphorin 5A                                                                          | Protein Coding    | 41 | GC05M009036 | 7.270325184 | <a href="https://www.genecards.org/cgi-bin/carddisp.pl?gene=SEMA5A">https://www.genecards.org/cgi-bin/carddisp.pl?gene=SEMA5A</a>               |
| UBE2D2        | Ubiquitin Conjugating Enzyme E2 D2                                                     | Protein Coding    | 45 | GC05P139526 | 7.266618252 | <a href="https://www.genecards.org/cgi-bin/carddisp.pl?gene=UBE2D2">https://www.genecards.org/cgi-bin/carddisp.pl?gene=UBE2D2</a>               |
| CAD           | Carbamoyl-Phosphate Synthetase 2, Aspartate Transcarbamylase, And Dihydroorotase       | Protein Coding    | 51 | GC02P027217 | 7.248846531 | <a href="https://www.genecards.org/cgi-bin/carddisp.pl?gene=CAD">https://www.genecards.org/cgi-bin/carddisp.pl?gene=CAD</a>                     |
| IFNL4         | Interferon Lambda 4 (Gene/Pseudogene)                                                  | Protein Coding    | 19 | GC19M039246 | 7.208087921 | <a href="https://www.genecards.org/cgi-bin/carddisp.pl?gene=IFNL4">https://www.genecards.org/cgi-bin/carddisp.pl?gene=IFNL4</a>                 |

|          |                                                                             |                |    |             |             |                                                                                                                                       |
|----------|-----------------------------------------------------------------------------|----------------|----|-------------|-------------|---------------------------------------------------------------------------------------------------------------------------------------|
| PSMD2    | Proteasome 26S Subunit Ubiquitin Receptor, Non-ATPase 2                     | Protein Coding | 44 | GC03P184298 | 7.17443943  | <a href="https://www.genecards.org/cgi-bin/carddisp.pl?gene=PSMD2">https://www.genecards.org/cgi-bin/carddisp.pl?gene=PSMD2</a>       |
| MAP3K11  | Mitogen-Activated Protein Kinase Kinase Kinase 11                           | Protein Coding | 48 | GC11M069402 | 7.16268301  | <a href="https://www.genecards.org/cgi-bin/carddisp.pl?gene=MAP3K11">https://www.genecards.org/cgi-bin/carddisp.pl?gene=MAP3K11</a>   |
| SIPA1L2  | Signal Induced Proliferation Associated 1 Like 2                            | Protein Coding | 38 | GC01M232397 | 7.149875641 | <a href="https://www.genecards.org/cgi-bin/carddisp.pl?gene=SIPA1L2">https://www.genecards.org/cgi-bin/carddisp.pl?gene=SIPA1L2</a>   |
| SDC2     | Syndecan 2                                                                  | Protein Coding | 45 | GC08P096495 | 7.136144638 | <a href="https://www.genecards.org/cgi-bin/carddisp.pl?gene=SDC2">https://www.genecards.org/cgi-bin/carddisp.pl?gene=SDC2</a>         |
| MMP11    | Matrix Metalloproteinase 11                                                 | Protein Coding | 46 | GC22P023768 | 7.109187603 | <a href="https://www.genecards.org/cgi-bin/carddisp.pl?gene=MMP11">https://www.genecards.org/cgi-bin/carddisp.pl?gene=MMP11</a>       |
| PARD3    | Par-3 Family Cell Polarity Regulator                                        | Protein Coding | 43 | GC10M034110 | 7.100137711 | <a href="https://www.genecards.org/cgi-bin/carddisp.pl?gene=PARD3">https://www.genecards.org/cgi-bin/carddisp.pl?gene=PARD3</a>       |
| KHDRBS3  | KH RNA Binding Domain Containing, Signal Transduction Associated 3          | Protein Coding | 39 | GC08P135457 | 7.090822697 | <a href="https://www.genecards.org/cgi-bin/carddisp.pl?gene=KHDRBS3">https://www.genecards.org/cgi-bin/carddisp.pl?gene=KHDRBS3</a>   |
| CMKLR1   | Chemerin Chemokine-Like Receptor 1                                          | Protein Coding | 41 | GC12M108288 | 7.008006573 | <a href="https://www.genecards.org/cgi-bin/carddisp.pl?gene=CMKLR1">https://www.genecards.org/cgi-bin/carddisp.pl?gene=CMKLR1</a>     |
| MYF5     | Mvogenic Factor 5                                                           | Protein Coding | 41 | GC12P080716 | 7.007295609 | <a href="https://www.genecards.org/cgi-bin/carddisp.pl?gene=MYF5">https://www.genecards.org/cgi-bin/carddisp.pl?gene=MYF5</a>         |
| SORCS3   | Sortilin Related VPS10 Domain Containing Receptor 3                         | Protein Coding | 37 | GC10P104642 | 6.999204159 | <a href="https://www.genecards.org/cgi-bin/carddisp.pl?gene=SORCS3">https://www.genecards.org/cgi-bin/carddisp.pl?gene=SORCS3</a>     |
| HNRNPC   | Heterogeneous Nuclear Ribonucleoprotein                                     | Protein Coding | 42 | GC14M021210 | 6.948101521 | <a href="https://www.genecards.org/cgi-bin/carddisp.pl?gene=HNRNPC">https://www.genecards.org/cgi-bin/carddisp.pl?gene=HNRNPC</a>     |
| UFM1     | Ubiquitin Fold Modifier 1                                                   | Protein Coding | 41 | GC13P038349 | 6.938527584 | <a href="https://www.genecards.org/cgi-bin/carddisp.pl?gene=UFM1">https://www.genecards.org/cgi-bin/carddisp.pl?gene=UFM1</a>         |
| CARS1    | Cysteinylnl-TRNA Synthetase 1                                               | Protein Coding | 34 | GC11M003000 | 6.91210556  | <a href="https://www.genecards.org/cgi-bin/carddisp.pl?gene=CARS1">https://www.genecards.org/cgi-bin/carddisp.pl?gene=CARS1</a>       |
| ADAMTS9  | ADAM Metalloproteinase With Thrombospondin Type 1 Motif9                    | Protein Coding | 38 | GC03M064501 | 6.903200626 | <a href="https://www.genecards.org/cgi-bin/carddisp.pl?gene=ADAMTS9">https://www.genecards.org/cgi-bin/carddisp.pl?gene=ADAMTS9</a>   |
| NDRG2    | NDRG Family Member 2                                                        | Protein Coding | 39 | GC14M021016 | 6.884765625 | <a href="https://www.genecards.org/cgi-bin/carddisp.pl?gene=NDRG2">https://www.genecards.org/cgi-bin/carddisp.pl?gene=NDRG2</a>       |
| CFD      | Complement Factor D                                                         | Protein Coding | 45 | GC19P000859 | 6.84444046  | <a href="https://www.genecards.org/cgi-bin/carddisp.pl?gene=CFD">https://www.genecards.org/cgi-bin/carddisp.pl?gene=CFD</a>           |
| PTBP1    | Polypyrimidine Tract Binding Protein 1                                      | Protein Coding | 43 | GC19P000797 | 6.802304268 | <a href="https://www.genecards.org/cgi-bin/carddisp.pl?gene=PTBP1">https://www.genecards.org/cgi-bin/carddisp.pl?gene=PTBP1</a>       |
| SLC38A8  | Solute Carrier Family 38 Member 8                                           | Protein Coding | 37 | GC16M084009 | 6.798454762 | <a href="https://www.genecards.org/cgi-bin/carddisp.pl?gene=SLC38A8">https://www.genecards.org/cgi-bin/carddisp.pl?gene=SLC38A8</a>   |
| ONECUT2  | One Cut Homeobox 2                                                          | Protein Coding | 36 | GC18P057436 | 6.7439394   | <a href="https://www.genecards.org/cgi-bin/carddisp.pl?gene=ONECUT2">https://www.genecards.org/cgi-bin/carddisp.pl?gene=ONECUT2</a>   |
| RIPK3    | Receptor Interacting Serine/Threonine Kinase 3                              | Protein Coding | 43 | GC14M024336 | 6.739554405 | <a href="https://www.genecards.org/cgi-bin/carddisp.pl?gene=RIPK3">https://www.genecards.org/cgi-bin/carddisp.pl?gene=RIPK3</a>       |
| PYCARD   | PYD And CARD Domain Containing                                              | Protein Coding | 43 | GC16M031201 | 6.707985878 | <a href="https://www.genecards.org/cgi-bin/carddisp.pl?gene=PYCARD">https://www.genecards.org/cgi-bin/carddisp.pl?gene=PYCARD</a>     |
| CCL19    | C-C Motif Chemokine Ligand 19                                               | Protein Coding | 42 | GC09M034692 | 6.706582546 | <a href="https://www.genecards.org/cgi-bin/carddisp.pl?gene=CCL19">https://www.genecards.org/cgi-bin/carddisp.pl?gene=CCL19</a>       |
| RPTOR    | Regulatory Associated Protein Of MTOR Complex 1                             | Protein Coding | 44 | GC17P080544 | 6.705212593 | <a href="https://www.genecards.org/cgi-bin/carddisp.pl?gene=RPTOR">https://www.genecards.org/cgi-bin/carddisp.pl?gene=RPTOR</a>       |
| HS3ST1   | Heparan Sulfate-Glucosamine 3-Sulfotransferase 1                            | Protein Coding | 43 | GC04M011394 | 6.701167107 | <a href="https://www.genecards.org/cgi-bin/carddisp.pl?gene=HS3ST1">https://www.genecards.org/cgi-bin/carddisp.pl?gene=HS3ST1</a>     |
| LCP1     | Lymphocyte Cytosolic Protein 1                                              | Protein Coding | 43 | GC13M046132 | 6.697141171 | <a href="https://www.genecards.org/cgi-bin/carddisp.pl?gene=LCP1">https://www.genecards.org/cgi-bin/carddisp.pl?gene=LCP1</a>         |
| TFAP2B   | Transcription Factor AP-2 Beta                                              | Protein Coding | 45 | GC06P055469 | 6.696252823 | <a href="https://www.genecards.org/cgi-bin/carddisp.pl?gene=TFAP2B">https://www.genecards.org/cgi-bin/carddisp.pl?gene=TFAP2B</a>     |
| MAP3K8   | Mitogen-Activated Protein Kinase Kinase Kinase 8                            | Protein Coding | 47 | GC10P030458 | 6.692231178 | <a href="https://www.genecards.org/cgi-bin/carddisp.pl?gene=MAP3K8">https://www.genecards.org/cgi-bin/carddisp.pl?gene=MAP3K8</a>     |
| SLC25A3  | Solute Carrier Family 25 Member 3                                           | Protein Coding | 45 | GC12P098593 | 6.669864655 | <a href="https://www.genecards.org/cgi-bin/carddisp.pl?gene=SLC25A3">https://www.genecards.org/cgi-bin/carddisp.pl?gene=SLC25A3</a>   |
| MAPK12   | Mitogen-Activated Protein Kinase 12                                         | Protein Coding | 49 | GC22M050246 | 6.659944057 | <a href="https://www.genecards.org/cgi-bin/carddisp.pl?gene=MAPK12">https://www.genecards.org/cgi-bin/carddisp.pl?gene=MAPK12</a>     |
| PNLIPRP2 | Pancreatic Lipase Related Protein 2 (Gene/Pseudogene)                       | Protein Coding | 37 | GC10P116620 | 6.652090073 | <a href="https://www.genecards.org/cgi-bin/carddisp.pl?gene=PNLIPRP2">https://www.genecards.org/cgi-bin/carddisp.pl?gene=PNLIPRP2</a> |
| YEATS2   | YEATS Domain Containing 2                                                   | Protein Coding | 37 | GC03P183698 | 6.634466648 | <a href="https://www.genecards.org/cgi-bin/carddisp.pl?gene=YEATS2">https://www.genecards.org/cgi-bin/carddisp.pl?gene=YEATS2</a>     |
| DARS1    | Aspartyl-TRNA Synthetase 1                                                  | Protein Coding | 37 | GC02M135905 | 6.609959602 | <a href="https://www.genecards.org/cgi-bin/carddisp.pl?gene=DARS1">https://www.genecards.org/cgi-bin/carddisp.pl?gene=DARS1</a>       |
| H1-4     | H1.4 Linker Histone, Cluster Member                                         | Protein Coding | 36 | GC06P055576 | 6.604896069 | <a href="https://www.genecards.org/cgi-bin/carddisp.pl?gene=H1-4">https://www.genecards.org/cgi-bin/carddisp.pl?gene=H1-4</a>         |
| INSIG1   | Insulin Induced Gene 1                                                      | Protein Coding | 40 | GC07P155297 | 6.590118885 | <a href="https://www.genecards.org/cgi-bin/carddisp.pl?gene=INSIG1">https://www.genecards.org/cgi-bin/carddisp.pl?gene=INSIG1</a>     |
| CXCL16   | C-X-C Motif Chemokine Ligand 16                                             | Protein Coding | 40 | GC17M004733 | 6.588072777 | <a href="https://www.genecards.org/cgi-bin/carddisp.pl?gene=CXCL16">https://www.genecards.org/cgi-bin/carddisp.pl?gene=CXCL16</a>     |
| LAMP3    | Lysosomal Associated Membrane Protein                                       | Protein Coding | 40 | GC03M183122 | 6.55397892  | <a href="https://www.genecards.org/cgi-bin/carddisp.pl?gene=LAMP3">https://www.genecards.org/cgi-bin/carddisp.pl?gene=LAMP3</a>       |
| BIRC2    | Baculoviral IAP Repeat Containing 2                                         | Protein Coding | 46 | GC11P102347 | 6.543526173 | <a href="https://www.genecards.org/cgi-bin/carddisp.pl?gene=BIRC2">https://www.genecards.org/cgi-bin/carddisp.pl?gene=BIRC2</a>       |
| SLC25A10 | Solute Carrier Family 25 Member 10                                          | Protein Coding | 43 | GC17P081712 | 6.54059124  | <a href="https://www.genecards.org/cgi-bin/carddisp.pl?gene=SLC25A10">https://www.genecards.org/cgi-bin/carddisp.pl?gene=SLC25A10</a> |
| INSIG2   | Insulin Induced Gene 2                                                      | Protein Coding | 41 | GC02P118088 | 6.534506798 | <a href="https://www.genecards.org/cgi-bin/carddisp.pl?gene=INSIG2">https://www.genecards.org/cgi-bin/carddisp.pl?gene=INSIG2</a>     |
| H4C1     | H4 Clustered Histone 1                                                      | Protein Coding | 33 | GC06P054981 | 6.511785507 | <a href="https://www.genecards.org/cgi-bin/carddisp.pl?gene=H4C1">https://www.genecards.org/cgi-bin/carddisp.pl?gene=H4C1</a>         |
| PTPRG    | Protein Tyrosine Phosphatase Receptor Type G                                | Protein Coding | 43 | GC03P061561 | 6.509430885 | <a href="https://www.genecards.org/cgi-bin/carddisp.pl?gene=PTPRG">https://www.genecards.org/cgi-bin/carddisp.pl?gene=PTPRG</a>       |
| NDUFS5   | NADH:Ubiquinone Oxidoreductase Subunit S5                                   | Protein Coding | 41 | GC01P039026 | 6.506564617 | <a href="https://www.genecards.org/cgi-bin/carddisp.pl?gene=NDUFS5">https://www.genecards.org/cgi-bin/carddisp.pl?gene=NDUFS5</a>     |
| BNIP3    | BCL2 Interacting Protein 3                                                  | Protein Coding | 43 | GC10M131966 | 6.503369331 | <a href="https://www.genecards.org/cgi-bin/carddisp.pl?gene=BNIP3">https://www.genecards.org/cgi-bin/carddisp.pl?gene=BNIP3</a>       |
| GLO1     | Glyoxalase 1                                                                | Protein Coding | 47 | GC06M047047 | 6.491281509 | <a href="https://www.genecards.org/cgi-bin/carddisp.pl?gene=GLO1">https://www.genecards.org/cgi-bin/carddisp.pl?gene=GLO1</a>         |
| SOC2     | Suppressor Of Cytokine Signaling 2                                          | Protein Coding | 45 | GC12P093569 | 6.465957642 | <a href="https://www.genecards.org/cgi-bin/carddisp.pl?gene=SOC2">https://www.genecards.org/cgi-bin/carddisp.pl?gene=SOC2</a>         |
| YBX1     | Y-Box Binding Protein 1                                                     | Protein Coding | 40 | GC01P042682 | 6.453653336 | <a href="https://www.genecards.org/cgi-bin/carddisp.pl?gene=YBX1">https://www.genecards.org/cgi-bin/carddisp.pl?gene=YBX1</a>         |
| IRF2BP2  | Interferon Regulatory Factor 2 Binding Protein 2                            | Protein Coding | 36 | GC01M234604 | 6.43283844  | <a href="https://www.genecards.org/cgi-bin/carddisp.pl?gene=IRF2BP2">https://www.genecards.org/cgi-bin/carddisp.pl?gene=IRF2BP2</a>   |
| ATXN2L   | Ataxin 2 Like                                                               | Protein Coding | 38 | GC16P032257 | 6.391595364 | <a href="https://www.genecards.org/cgi-bin/carddisp.pl?gene=ATXN2L">https://www.genecards.org/cgi-bin/carddisp.pl?gene=ATXN2L</a>     |
| YWHAB    | Tyrosine 3-Monooxygenase/Tryptophan 5-Monooxygenase Activation Protein Beta | Protein Coding | 49 | GC20P044885 | 6.389775753 | <a href="https://www.genecards.org/cgi-bin/carddisp.pl?gene=YWHAB">https://www.genecards.org/cgi-bin/carddisp.pl?gene=YWHAB</a>       |
| ATF3     | Activating Transcription Factor 3                                           | Protein Coding | 45 | GC01P212565 | 6.369270325 | <a href="https://www.genecards.org/cgi-bin/carddisp.pl?gene=ATF3">https://www.genecards.org/cgi-bin/carddisp.pl?gene=ATF3</a>         |
| PRKCE    | Protein Kinase C Epsilon                                                    | Protein Coding | 50 | GC02P045651 | 6.321177483 | <a href="https://www.genecards.org/cgi-bin/carddisp.pl?gene=PRKCE">https://www.genecards.org/cgi-bin/carddisp.pl?gene=PRKCE</a>       |
| NDUFA8   | NADH:Ubiquinone Oxidoreductase Subunit A8                                   | Protein Coding | 43 | GC09M122132 | 6.320979118 | <a href="https://www.genecards.org/cgi-bin/carddisp.pl?gene=NDUFA8">https://www.genecards.org/cgi-bin/carddisp.pl?gene=NDUFA8</a>     |
| UQCRI1   | Ubiquinol-Cytochrome C Reductase, Complex III Subunit XI                    | Protein Coding | 37 | GC19M001597 | 6.31750679  | <a href="https://www.genecards.org/cgi-bin/carddisp.pl?gene=UQCRI1">https://www.genecards.org/cgi-bin/carddisp.pl?gene=UQCRI1</a>     |
| CCRL2    | C-C Motif Chemokine Receptor Like 2                                         | Protein Coding | 40 | GC03P046407 | 6.307687283 | <a href="https://www.genecards.org/cgi-bin/carddisp.pl?gene=CCRL2">https://www.genecards.org/cgi-bin/carddisp.pl?gene=CCRL2</a>       |
| NDUFA5   | NADH:Ubiquinone Oxidoreductase Subunit A5                                   | Protein Coding | 43 | GC07M123536 | 6.300936222 | <a href="https://www.genecards.org/cgi-bin/carddisp.pl?gene=NDUFA5">https://www.genecards.org/cgi-bin/carddisp.pl?gene=NDUFA5</a>     |
| PCLO     | Piccolo Presynaptic Cytomatrix Protein                                      | Protein Coding | 41 | GC07M082754 | 6.291733446 | <a href="https://www.genecards.org/cgi-bin/carddisp.pl?gene=PCLO">https://www.genecards.org/cgi-bin/carddisp.pl?gene=PCLO</a>         |
| PCSK5    | Proprotein Convertase Subtilisin/Kexin Type 5                               | Protein Coding | 41 | GC09P075890 | 6.295871735 | <a href="https://www.genecards.org/cgi-bin/carddisp.pl?gene=PCSK5">https://www.genecards.org/cgi-bin/carddisp.pl?gene=PCSK5</a>       |
| MIR103A2 | MicroRNA 103a-2                                                             | RNA Gene       | 18 | GC20P003917 | 6.281816483 | <a href="https://www.genecards.org/cgi-bin/carddisp.pl?gene=MIR103A2">https://www.genecards.org/cgi-bin/carddisp.pl?gene=MIR103A2</a> |
| CAMKK2   | Calcium/Calmodulin Dependent Protein Kinase Kinase 2                        | Protein Coding | 47 | GC12M121496 | 6.273727894 | <a href="https://www.genecards.org/cgi-bin/carddisp.pl?gene=CAMKK2">https://www.genecards.org/cgi-bin/carddisp.pl?gene=CAMKK2</a>     |
| SVIL     | Supervillin                                                                 | Protein Coding | 42 | GC10M031105 | 6.273127556 | <a href="https://www.genecards.org/cgi-bin/carddisp.pl?gene=SVIL">https://www.genecards.org/cgi-bin/carddisp.pl?gene=SVIL</a>         |
| SIRT5    | Sirtuin 5                                                                   | Protein Coding | 45 | GC06P013574 | 6.262564659 | <a href="https://www.genecards.org/cgi-bin/carddisp.pl?gene=SIRT5">https://www.genecards.org/cgi-bin/carddisp.pl?gene=SIRT5</a>       |
| CTBP2    | C-Terminal Binding Protein 2                                                | Protein Coding | 45 | GC10M124984 | 6.257704258 | <a href="https://www.genecards.org/cgi-bin/carddisp.pl?gene=CTBP2">https://www.genecards.org/cgi-bin/carddisp.pl?gene=CTBP2</a>       |
| USP7     | Ubiquitin Specific Peptidase 7                                              | Protein Coding | 49 | GC16M008892 | 6.241252899 | <a href="https://www.genecards.org/cgi-bin/carddisp.pl?gene=USP7">https://www.genecards.org/cgi-bin/carddisp.pl?gene=USP7</a>         |
| CYP2A13  | Cytochrome P450 Family 2 Subfamily A Member 13                              | Protein Coding | 42 | GC19P041088 | 6.240559101 | <a href="https://www.genecards.org/cgi-bin/carddisp.pl?gene=CYP2A13">https://www.genecards.org/cgi-bin/carddisp.pl?gene=CYP2A13</a>   |
| TRIB3    | Tribbles Pseudokinase 3                                                     | Protein Coding | 44 | GC20P000361 | 6.240134239 | <a href="https://www.genecards.org/cgi-bin/carddisp.pl?gene=TRIB3">https://www.genecards.org/cgi-bin/carddisp.pl?gene=TRIB3</a>       |
| NGF-AS1  | NGF Antisense RNA 1                                                         | RNA Gene       | 10 | GC01P115280 | 6.172226906 | <a href="https://www.genecards.org/cgi-bin/carddisp.pl?gene=NGF-AS1">https://www.genecards.org/cgi-bin/carddisp.pl?gene=NGF-AS1</a>   |
| TPM4     | Tropomyosin 4                                                               | Protein Coding | 41 | GC19P026610 | 6.156361103 | <a href="https://www.genecards.org/cgi-bin/carddisp.pl?gene=TPM4">https://www.genecards.org/cgi-bin/carddisp.pl?gene=TPM4</a>         |
| CALD1    | Caldesmon 1                                                                 | Protein Coding | 43 | GC07P134744 | 6.150755405 | <a href="https://www.genecards.org/cgi-bin/carddisp.pl?gene=CALD1">https://www.genecards.org/cgi-bin/carddisp.pl?gene=CALD1</a>       |
| ESM1     | Endothelial Cell Specific Molecule 1                                        | Protein Coding | 40 | GC05M054977 | 6.138051987 | <a href="https://www.genecards.org/cgi-bin/carddisp.pl?gene=ESM1">https://www.genecards.org/cgi-bin/carddisp.pl?gene=ESM1</a>         |
| RPL13    | Ribosomal Protein L13                                                       | Protein Coding | 43 | GC16P089802 | 6.135052204 | <a href="https://www.genecards.org/cgi-bin/carddisp.pl?gene=RPL13">https://www.genecards.org/cgi-bin/carddisp.pl?gene=RPL13</a>       |
| KLB      | Klotho Beta                                                                 | Protein Coding | 40 | GC04P039408 | 6.119310379 | <a href="https://www.genecards.org/cgi-bin/carddisp.pl?gene=KLB">https://www.genecards.org/cgi-bin/carddisp.pl?gene=KLB</a>           |
| RPN1     | Ribophorin 1                                                                | Protein Coding | 44 | GC03M128619 | 6.111598969 | <a href="https://www.genecards.org/cgi-bin/carddisp.pl?gene=RPN1">https://www.genecards.org/cgi-bin/carddisp.pl?gene=RPN1</a>         |
| APLN     | Apolin Receptor                                                             | Protein Coding | 44 | GC11M057233 | 6.1106987   | <a href="https://www.genecards.org/cgi-bin/carddisp.pl?gene=APLN">https://www.genecards.org/cgi-bin/carddisp.pl?gene=APLN</a>         |
| RPLP2    | Ribosomal Protein Lateral Stalk Subunit                                     | Protein Coding | 42 | GC11P000984 | 6.108006477 | <a href="https://www.genecards.org/cgi-bin/carddisp.pl?gene=RPLP2">https://www.genecards.org/cgi-bin/carddisp.pl?gene=RPLP2</a>       |
| NUDT4    | Nudix Hydrolase 4                                                           | Protein Coding | 40 | GC12P093392 | 6.082500935 | <a href="https://www.genecards.org/cgi-bin/carddisp.pl?gene=NUDT4">https://www.genecards.org/cgi-bin/carddisp.pl?gene=NUDT4</a>       |
| TET1     | Tet Methylecysteine Dioxygenase 1                                           | Protein Coding | 38 | GC10P068560 | 6.082352638 | <a href="https://www.genecards.org/cgi-bin/carddisp.pl?gene=TET1">https://www.genecards.org/cgi-bin/carddisp.pl?gene=TET1</a>         |
| H4C11    | H4 Clustered Histone 11                                                     | Protein Coding | 30 | GC06P055048 | 6.066231251 | <a href="https://www.genecards.org/cgi-bin/carddisp.pl?gene=H4C11">https://www.genecards.org/cgi-bin/carddisp.pl?gene=H4C11</a>       |
| H4C8     | H4 Clustered Histone 8                                                      | Protein Coding | 30 | GC06M047225 | 6.056311607 | <a href="https://www.genecards.org/cgi-bin/carddisp.pl?gene=H4C8">https://www.genecards.org/cgi-bin/carddisp.pl?gene=H4C8</a>         |
| SLC6A9   | Solute Carrier Family 6 Member 9                                            | Protein Coding | 50 | GC01M043991 | 6.052671432 | <a href="https://www.genecards.org/cgi-bin/carddisp.pl?gene=SLC6A9">https://www.genecards.org/cgi-bin/carddisp.pl?gene=SLC6A9</a>     |
| SNHG20   | Small Nucleolar RNA Host Gene 20                                            | RNA Gene       | 17 | GC17P077087 | 6.046751976 | <a href="https://www.genecards.org/cgi-bin/carddisp.pl?gene=SNHG20">https://www.genecards.org/cgi-bin/carddisp.pl?gene=SNHG20</a>     |
| H4C4     | H4 Clustered Histone 4                                                      | Protein Coding | 27 | GC06M047223 | 6.037734985 | <a href="https://www.genecards.org/cgi-bin/carddisp.pl?gene=H4C4">https://www.genecards.org/cgi-bin/carddisp.pl?gene=H4C4</a>         |
| TPT1     | Tumor Protein, Translationally-Controlled                                   | Protein Coding | 47 | GC13M045333 | 6.0363307   | <a href="https://www.genecards.org/cgi-bin/carddisp.pl?gene=TPT1">https://www.genecards.org/cgi-bin/carddisp.pl?gene=TPT1</a>         |
| RPL7A    | Ribosomal Protein L7a                                                       | Protein Coding | 43 | GC09P133348 | 6.030329704 | <a href="https://www.genecards.org/cgi-bin/carddisp.pl?gene=RPL7A">https://www.genecards.org/cgi-bin/carddisp.pl?gene=RPL7A</a>       |
| RPL6     | Ribosomal Protein L6                                                        | Protein Coding | 40 | GC12M112320 | 6.025621891 | <a href="https://www.genecards.org/cgi-bin/carddisp.pl?gene=RPL6">https://www.genecards.org/cgi-bin/carddisp.pl?gene=RPL6</a>         |
| PTPRU    | Protein Tyrosine Phosphatase Receptor Type U                                | Protein Coding | 43 | GC01P029236 | 6.015058994 | <a href="https://www.genecards.org/cgi-bin/carddisp.pl?gene=PTPRU">https://www.genecards.org/cgi-bin/carddisp.pl?gene=PTPRU</a>       |

|           |                                                                             |                |    |             |             |                                                                                                                                         |
|-----------|-----------------------------------------------------------------------------|----------------|----|-------------|-------------|-----------------------------------------------------------------------------------------------------------------------------------------|
| FARP1     | FERM, ARH/RhoGEF And Pleckstrin Domain Protein 1                            | Protein Coding | 38 | GC13P098142 | 6.014532089 | <a href="https://www.genecards.org/cgi-bin/carddisp.pl?gene=FARP1">https://www.genecards.org/cgi-bin/carddisp.pl?gene=FARP1</a>         |
| CBLB      | Cbl Proto-Oncogene B                                                        | Protein Coding | 45 | GC03M105655 | 6.01316309  | <a href="https://www.genecards.org/cgi-bin/carddisp.pl?gene=CBLB">https://www.genecards.org/cgi-bin/carddisp.pl?gene=CBLB</a>           |
| SAT1      | Spermidine/Spermine N1-                                                     | Protein Coding | 46 | GC0XP023784 | 6.010082245 | <a href="https://www.genecards.org/cgi-bin/carddisp.pl?gene=SAT1">https://www.genecards.org/cgi-bin/carddisp.pl?gene=SAT1</a>           |
| YBX3      | Y-Box Binding Protein 3                                                     | Protein Coding | 40 | GC12M015696 | 6.006464005 | <a href="https://www.genecards.org/cgi-bin/carddisp.pl?gene=YBX3">https://www.genecards.org/cgi-bin/carddisp.pl?gene=YBX3</a>           |
| CCNC      | Cyclin C                                                                    | Protein Coding | 41 | GC06M099542 | 6.002334595 | <a href="https://www.genecards.org/cgi-bin/carddisp.pl?gene=CCNC">https://www.genecards.org/cgi-bin/carddisp.pl?gene=CCNC</a>           |
| NDUFB7    | NADH:Ubiquinone Oxidoreductase Subunit B7                                   | Protein Coding | 40 | GC19M014566 | 5.997264862 | <a href="https://www.genecards.org/cgi-bin/carddisp.pl?gene=NDUFB7">https://www.genecards.org/cgi-bin/carddisp.pl?gene=NDUFB7</a>       |
| IL1R2     | Interleukin 1 Receptor Type 2                                               | Protein Coding | 45 | GC02P101991 | 5.982992172 | <a href="https://www.genecards.org/cgi-bin/carddisp.pl?gene=IL1R2">https://www.genecards.org/cgi-bin/carddisp.pl?gene=IL1R2</a>         |
| SRSF6     | Serine And Arginine Rich Splicing Factor                                    | Protein Coding | 40 | GC02P043457 | 5.979786873 | <a href="https://www.genecards.org/cgi-bin/carddisp.pl?gene=SRSF6">https://www.genecards.org/cgi-bin/carddisp.pl?gene=SRSF6</a>         |
| YIPF1     | Yip1 Domain Family Member 1                                                 | Protein Coding | 36 | GC01M053851 | 5.975258827 | <a href="https://www.genecards.org/cgi-bin/carddisp.pl?gene=YIPF1">https://www.genecards.org/cgi-bin/carddisp.pl?gene=YIPF1</a>         |
| MIR33B    | MicroRNA 33b                                                                | RNA Gene       | 18 | GC17M017813 | 5.944622993 | <a href="https://www.genecards.org/cgi-bin/carddisp.pl?gene=MIR33B">https://www.genecards.org/cgi-bin/carddisp.pl?gene=MIR33B</a>       |
| PABPC1    | Poly(A) Binding Protein Cytoplasmic 1                                       | Protein Coding | 43 | GC08M100685 | 5.944006692 | <a href="https://www.genecards.org/cgi-bin/carddisp.pl?gene=PABPC1">https://www.genecards.org/cgi-bin/carddisp.pl?gene=PABPC1</a>       |
| HNRNPH1   | Heterogeneous Nuclear Ribonucleoprotein H1                                  | Protein Coding | 40 | GC05M179614 | 5.939538002 | <a href="https://www.genecards.org/cgi-bin/carddisp.pl?gene=HNRNPH1">https://www.genecards.org/cgi-bin/carddisp.pl?gene=HNRNPH1</a>     |
| TSBP1-AS1 | TSBP1 And BTLN2 Antisense RNA 1                                             | RNA Gene       | 9  | GC06P058058 | 5.935389042 | <a href="https://www.genecards.org/cgi-bin/carddisp.pl?gene=TSBP1-AS1">https://www.genecards.org/cgi-bin/carddisp.pl?gene=TSBP1-AS1</a> |
| NFE2L1    | Nuclear Factor, Erythroid 2 Like 1                                          | Protein Coding | 44 | GC17P048049 | 5.928246498 | <a href="https://www.genecards.org/cgi-bin/carddisp.pl?gene=NFE2L1">https://www.genecards.org/cgi-bin/carddisp.pl?gene=NFE2L1</a>       |
| RPS11     | Ribosomal Protein S11                                                       | Protein Coding | 40 | GC19P049496 | 5.921973705 | <a href="https://www.genecards.org/cgi-bin/carddisp.pl?gene=RPS11">https://www.genecards.org/cgi-bin/carddisp.pl?gene=RPS11</a>         |
| H4C9      | H4 Clustered Histone 9                                                      | Protein Coding | 30 | GC06P055592 | 5.885432243 | <a href="https://www.genecards.org/cgi-bin/carddisp.pl?gene=H4C9">https://www.genecards.org/cgi-bin/carddisp.pl?gene=H4C9</a>           |
| IL34      | Interleukin 34                                                              | Protein Coding | 40 | GC16P070656 | 5.87556076  | <a href="https://www.genecards.org/cgi-bin/carddisp.pl?gene=IL34">https://www.genecards.org/cgi-bin/carddisp.pl?gene=IL34</a>           |
| AP2B1     | Adaptor Related Protein Complex 2 Subunit Beta 1                            | Protein Coding | 43 | GC17P035578 | 5.87352562  | <a href="https://www.genecards.org/cgi-bin/carddisp.pl?gene=AP2B1">https://www.genecards.org/cgi-bin/carddisp.pl?gene=AP2B1</a>         |
| RPS18     | Ribosomal Protein S18                                                       | Protein Coding | 41 | GC06P055262 | 5.869342804 | <a href="https://www.genecards.org/cgi-bin/carddisp.pl?gene=RPS18">https://www.genecards.org/cgi-bin/carddisp.pl?gene=RPS18</a>         |
| AQP7      | Aquaporin 7                                                                 | Protein Coding | 45 | GC09M033384 | 5.860530853 | <a href="https://www.genecards.org/cgi-bin/carddisp.pl?gene=AQP7">https://www.genecards.org/cgi-bin/carddisp.pl?gene=AQP7</a>           |
| SLC3A2    | Solute Carrier Family 3 Member 2                                            | Protein Coding | 43 | GC11P062856 | 5.83400631  | <a href="https://www.genecards.org/cgi-bin/carddisp.pl?gene=SLC3A2">https://www.genecards.org/cgi-bin/carddisp.pl?gene=SLC3A2</a>       |
| H4C3      | H4 Clustered Histone 3                                                      | Protein Coding | 30 | GC06P054986 | 5.831675529 | <a href="https://www.genecards.org/cgi-bin/carddisp.pl?gene=H4C3">https://www.genecards.org/cgi-bin/carddisp.pl?gene=H4C3</a>           |
| MCM3      | Minichromosome Maintenance Complex Component 3                              | Protein Coding | 46 | GC06M052264 | 5.821012497 | <a href="https://www.genecards.org/cgi-bin/carddisp.pl?gene=MCM3">https://www.genecards.org/cgi-bin/carddisp.pl?gene=MCM3</a>           |
| ST8SIA1   | ST8 Alpha-N-Acetyl-Neuraminide Alpha-2,8-Sialyltransferase 1                | Protein Coding | 41 | GC12M022063 | 5.802177429 | <a href="https://www.genecards.org/cgi-bin/carddisp.pl?gene=ST8SIA1">https://www.genecards.org/cgi-bin/carddisp.pl?gene=ST8SIA1</a>     |
| H4C2      | H4 Clustered Histone 2                                                      | Protein Coding | 31 | GC06M026026 | 5.790835381 | <a href="https://www.genecards.org/cgi-bin/carddisp.pl?gene=H4C2">https://www.genecards.org/cgi-bin/carddisp.pl?gene=H4C2</a>           |
| H4C13     | H4 Clustered Histone 13                                                     | Protein Coding | 29 | GC06M047221 | 5.790835381 | <a href="https://www.genecards.org/cgi-bin/carddisp.pl?gene=H4C13">https://www.genecards.org/cgi-bin/carddisp.pl?gene=H4C13</a>         |
| H4C6      | H4 Clustered Histone 6                                                      | Protein Coding | 29 | GC06P055591 | 5.787128448 | <a href="https://www.genecards.org/cgi-bin/carddisp.pl?gene=H4C6">https://www.genecards.org/cgi-bin/carddisp.pl?gene=H4C6</a>           |
| ROCK1     | Rho Associated Coiled-Coil Containing Protein Kinase 1                      | Protein Coding | 51 | GC18M020946 | 5.780395508 | <a href="https://www.genecards.org/cgi-bin/carddisp.pl?gene=ROCK1">https://www.genecards.org/cgi-bin/carddisp.pl?gene=ROCK1</a>         |
| H4C14     | H4 Clustered Histone 14                                                     | Protein Coding | 29 | GC01P149832 | 5.77880764  | <a href="https://www.genecards.org/cgi-bin/carddisp.pl?gene=H4C14">https://www.genecards.org/cgi-bin/carddisp.pl?gene=H4C14</a>         |
| H4C15     | H4 Clustered Histone 15                                                     | Protein Coding | 27 | GC01M150133 | 5.77880764  | <a href="https://www.genecards.org/cgi-bin/carddisp.pl?gene=H4C15">https://www.genecards.org/cgi-bin/carddisp.pl?gene=H4C15</a>         |
| H4C12     | H4 Clustered Histone 12                                                     | Protein Coding | 29 | GC06M047220 | 5.775533676 | <a href="https://www.genecards.org/cgi-bin/carddisp.pl?gene=H4C12">https://www.genecards.org/cgi-bin/carddisp.pl?gene=H4C12</a>         |
| EHBPI1L1  | EH Domain Binding Protein 1 Like 1                                          | Protein Coding | 32 | GC11P066231 | 5.773977757 | <a href="https://www.genecards.org/cgi-bin/carddisp.pl?gene=EHBPI1L1">https://www.genecards.org/cgi-bin/carddisp.pl?gene=EHBPI1L1</a>   |
| PRKAG3    | Protein Kinase AMP-Activated Non-Catalytic Subunit Gamma 3                  | Protein Coding | 44 | GC02M218823 | 5.771601677 | <a href="https://www.genecards.org/cgi-bin/carddisp.pl?gene=PRKAG3">https://www.genecards.org/cgi-bin/carddisp.pl?gene=PRKAG3</a>       |
| H4C5      | H4 Clustered Histone 5                                                      | Protein Coding | 28 | GC06P055590 | 5.76215744  | <a href="https://www.genecards.org/cgi-bin/carddisp.pl?gene=H4C5">https://www.genecards.org/cgi-bin/carddisp.pl?gene=H4C5</a>           |
| BCAT1     | Branched Chain Amino Acid                                                   | Protein Coding | 47 | GC12M024732 | 5.727366924 | <a href="https://www.genecards.org/cgi-bin/carddisp.pl?gene=BCAT1">https://www.genecards.org/cgi-bin/carddisp.pl?gene=BCAT1</a>         |
| FAP       | Fibroblast Activation Protein Alpha                                         | Protein Coding | 43 | GC02M162170 | 5.723641872 | <a href="https://www.genecards.org/cgi-bin/carddisp.pl?gene=FAP">https://www.genecards.org/cgi-bin/carddisp.pl?gene=FAP</a>             |
| ESRRG     | Estrogen Related Receptor Gamma                                             | Protein Coding | 46 | GC01M216503 | 5.6957798   | <a href="https://www.genecards.org/cgi-bin/carddisp.pl?gene=ESRRG">https://www.genecards.org/cgi-bin/carddisp.pl?gene=ESRRG</a>         |
| FRK       | Fyn Related Src Family Tyrosine Kinase                                      | Protein Coding | 45 | GC06M115931 | 5.694391251 | <a href="https://www.genecards.org/cgi-bin/carddisp.pl?gene=FRK">https://www.genecards.org/cgi-bin/carddisp.pl?gene=FRK</a>             |
| UQCRI0    | Ubiquinol-Cytochrome C Reductase, Complex III Subunit X                     | Protein Coding | 40 | GC22P029767 | 5.678407669 | <a href="https://www.genecards.org/cgi-bin/carddisp.pl?gene=UQCRI0">https://www.genecards.org/cgi-bin/carddisp.pl?gene=UQCRI0</a>       |
| CYP2F1    | Cytochrome P450 Family 2 Subfamily F Member 1                               | Protein Coding | 43 | GC19P041114 | 5.677024841 | <a href="https://www.genecards.org/cgi-bin/carddisp.pl?gene=CYP2F1">https://www.genecards.org/cgi-bin/carddisp.pl?gene=CYP2F1</a>       |
| LAPTM4A   | Lysosomal Protein Transmembrane 4                                           | Protein Coding | 38 | GC02M020032 | 5.6571064   | <a href="https://www.genecards.org/cgi-bin/carddisp.pl?gene=LAPTM4A">https://www.genecards.org/cgi-bin/carddisp.pl?gene=LAPTM4A</a>     |
| RPL10A    | Ribosomal Protein L10a                                                      | Protein Coding | 43 | GC06P055328 | 5.652759552 | <a href="https://www.genecards.org/cgi-bin/carddisp.pl?gene=RPL10A">https://www.genecards.org/cgi-bin/carddisp.pl?gene=RPL10A</a>       |
| NCL       | Nucleolin                                                                   | Protein Coding | 43 | GC02M231453 | 5.64723587  | <a href="https://www.genecards.org/cgi-bin/carddisp.pl?gene=NCL">https://www.genecards.org/cgi-bin/carddisp.pl?gene=NCL</a>             |
| TTF2      | Transcription Termination Factor 2                                          | Protein Coding | 40 | GC01P117060 | 5.64432478  | <a href="https://www.genecards.org/cgi-bin/carddisp.pl?gene=TTF2">https://www.genecards.org/cgi-bin/carddisp.pl?gene=TTF2</a>           |
| SLC46A3   | Solute Carrier Family 46 Member 3                                           | Protein Coding | 37 | GC13M028700 | 5.642365932 | <a href="https://www.genecards.org/cgi-bin/carddisp.pl?gene=SLC46A3">https://www.genecards.org/cgi-bin/carddisp.pl?gene=SLC46A3</a>     |
| TNR       | Tenascin R                                                                  | Protein Coding | 43 | GC01M175291 | 5.59887886  | <a href="https://www.genecards.org/cgi-bin/carddisp.pl?gene=TNR">https://www.genecards.org/cgi-bin/carddisp.pl?gene=TNR</a>             |
| NDUFB6    | NADH:Ubiquinone Oxidoreductase Subunit B6                                   | Protein Coding | 40 | GC09M032553 | 5.591681957 | <a href="https://www.genecards.org/cgi-bin/carddisp.pl?gene=NDUFB6">https://www.genecards.org/cgi-bin/carddisp.pl?gene=NDUFB6</a>       |
| FETUB     | Fetuin B                                                                    | Protein Coding | 37 | GC03P186635 | 5.586373329 | <a href="https://www.genecards.org/cgi-bin/carddisp.pl?gene=FETUB">https://www.genecards.org/cgi-bin/carddisp.pl?gene=FETUB</a>         |
| RPL3      | Ribosomal Protein L3                                                        | Protein Coding | 42 | GC22M048526 | 5.510959625 | <a href="https://www.genecards.org/cgi-bin/carddisp.pl?gene=RPL3">https://www.genecards.org/cgi-bin/carddisp.pl?gene=RPL3</a>           |
| RPL12     | Ribosomal Protein L12                                                       | Protein Coding | 43 | GC09M127447 | 5.504228115 | <a href="https://www.genecards.org/cgi-bin/carddisp.pl?gene=RPL12">https://www.genecards.org/cgi-bin/carddisp.pl?gene=RPL12</a>         |
| MRTFA     | Myocardin Related Transcription Factor A                                    | Protein Coding | 35 | GC22M049024 | 5.501933575 | <a href="https://www.genecards.org/cgi-bin/carddisp.pl?gene=MRTFA">https://www.genecards.org/cgi-bin/carddisp.pl?gene=MRTFA</a>         |
| CTSS      | Cathepsin S                                                                 | Protein Coding | 46 | GC01M150730 | 5.498209953 | <a href="https://www.genecards.org/cgi-bin/carddisp.pl?gene=CTSS">https://www.genecards.org/cgi-bin/carddisp.pl?gene=CTSS</a>           |
| AEBP1     | AE Binding Protein 1                                                        | Protein Coding | 41 | GC07P044106 | 5.477787018 | <a href="https://www.genecards.org/cgi-bin/carddisp.pl?gene=AEBP1">https://www.genecards.org/cgi-bin/carddisp.pl?gene=AEBP1</a>         |
| PDGFC     | Platelet Derived Growth Factor C                                            | Protein Coding | 44 | GC04M156760 | 5.476284027 | <a href="https://www.genecards.org/cgi-bin/carddisp.pl?gene=PDGFC">https://www.genecards.org/cgi-bin/carddisp.pl?gene=PDGFC</a>         |
| PFKFB3    | 6-Phosphofructo-2-Kinase/Fructose-2,6-Biphosphatase 3                       | Protein Coding | 45 | GC10P006144 | 5.470271111 | <a href="https://www.genecards.org/cgi-bin/carddisp.pl?gene=PFKFB3">https://www.genecards.org/cgi-bin/carddisp.pl?gene=PFKFB3</a>       |
| SUGP1     | SURP And G-Patch Domain Containing 1                                        | Protein Coding | 35 | GC19M019276 | 5.46651125  | <a href="https://www.genecards.org/cgi-bin/carddisp.pl?gene=SUGP1">https://www.genecards.org/cgi-bin/carddisp.pl?gene=SUGP1</a>         |
| FAF2      | Fas Associated Factor Family Member 2                                       | Protein Coding | 38 | GC05P176447 | 5.463183403 | <a href="https://www.genecards.org/cgi-bin/carddisp.pl?gene=FAF2">https://www.genecards.org/cgi-bin/carddisp.pl?gene=FAF2</a>           |
| RPS23     | Ribosomal Protein S23                                                       | Protein Coding | 41 | GC05M082273 | 5.451299191 | <a href="https://www.genecards.org/cgi-bin/carddisp.pl?gene=RPS23">https://www.genecards.org/cgi-bin/carddisp.pl?gene=RPS23</a>         |
| YWHAZ     | Tyrosine 3-Monooxygenase/Tryptophan 5-Monooxygenase Activation Protein Zeta | Protein Coding | 48 | GC08M100917 | 5.445477486 | <a href="https://www.genecards.org/cgi-bin/carddisp.pl?gene=YWHAZ">https://www.genecards.org/cgi-bin/carddisp.pl?gene=YWHAZ</a>         |
| CWF19L1   | CWF19 Like Cell Cycle Control Factor 1                                      | Protein Coding | 39 | GC10M100232 | 5.412953854 | <a href="https://www.genecards.org/cgi-bin/carddisp.pl?gene=CWF19L1">https://www.genecards.org/cgi-bin/carddisp.pl?gene=CWF19L1</a>     |
| HSP90AB1  | Heat Shock Protein 90 Alpha Family Class B Member 1                         | Protein Coding | 46 | GC06P044246 | 5.409389496 | <a href="https://www.genecards.org/cgi-bin/carddisp.pl?gene=HSP90AB1">https://www.genecards.org/cgi-bin/carddisp.pl?gene=HSP90AB1</a>   |
| HNRNPF    | Heterogeneous Nuclear Ribonucleoprotein                                     | Protein Coding | 41 | GC10M043385 | 5.407585621 | <a href="https://www.genecards.org/cgi-bin/carddisp.pl?gene=HNRNPF">https://www.genecards.org/cgi-bin/carddisp.pl?gene=HNRNPF</a>       |
| GCN1      | GCN1 Activator Of EIF2AK4                                                   | Protein Coding | 29 | GC12M120128 | 5.405367851 | <a href="https://www.genecards.org/cgi-bin/carddisp.pl?gene=GCN1">https://www.genecards.org/cgi-bin/carddisp.pl?gene=GCN1</a>           |
| PCBP2     | Poly(RC) Binding Protein 2                                                  | Protein Coding | 42 | GC12P053452 | 5.392615318 | <a href="https://www.genecards.org/cgi-bin/carddisp.pl?gene=PCBP2">https://www.genecards.org/cgi-bin/carddisp.pl?gene=PCBP2</a>         |
| ZP4       | Zona Pellucida Glycoprotein 4                                               | Protein Coding | 33 | GC01M237877 | 5.388515472 | <a href="https://www.genecards.org/cgi-bin/carddisp.pl?gene=ZP4">https://www.genecards.org/cgi-bin/carddisp.pl?gene=ZP4</a>             |
| RPL30     | Ribosomal Protein L30                                                       | Protein Coding | 41 | GC08M098024 | 5.386371613 | <a href="https://www.genecards.org/cgi-bin/carddisp.pl?gene=RPL30">https://www.genecards.org/cgi-bin/carddisp.pl?gene=RPL30</a>         |
| NMT2      | N-Myristoyltransferase 2                                                    | Protein Coding | 41 | GC10M015115 | 5.380367279 | <a href="https://www.genecards.org/cgi-bin/carddisp.pl?gene=NMT2">https://www.genecards.org/cgi-bin/carddisp.pl?gene=NMT2</a>           |
| COX5B     | Cytochrome C Oxidase Subunit 5B                                             | Protein Coding | 42 | GC02P097628 | 5.375883102 | <a href="https://www.genecards.org/cgi-bin/carddisp.pl?gene=COX5B">https://www.genecards.org/cgi-bin/carddisp.pl?gene=COX5B</a>         |
| INHBA     | Inhibin Subunit Beta A                                                      | Protein Coding | 45 | GC07M041668 | 5.367442131 | <a href="https://www.genecards.org/cgi-bin/carddisp.pl?gene=INHBA">https://www.genecards.org/cgi-bin/carddisp.pl?gene=INHBA</a>         |
| PCBP1     | Poly(RC) Binding Protein 1                                                  | Protein Coding | 43 | GC02P070087 | 5.364738941 | <a href="https://www.genecards.org/cgi-bin/carddisp.pl?gene=PCBP1">https://www.genecards.org/cgi-bin/carddisp.pl?gene=PCBP1</a>         |
| COX7A2L   | Cytochrome C Oxidase Subunit 7A2 Like                                       | Protein Coding | 42 | GC02M042312 | 5.352900505 | <a href="https://www.genecards.org/cgi-bin/carddisp.pl?gene=COX7A2L">https://www.genecards.org/cgi-bin/carddisp.pl?gene=COX7A2L</a>     |
| HLX       | H2.0 Like Homeobox                                                          | Protein Coding | 41 | GC01P220879 | 5.319946766 | <a href="https://www.genecards.org/cgi-bin/carddisp.pl?gene=HLX">https://www.genecards.org/cgi-bin/carddisp.pl?gene=HLX</a>             |
| MIR372    | MicroRNA 372                                                                | RNA Gene       | 16 | GC19P056407 | 5.312681198 | <a href="https://www.genecards.org/cgi-bin/carddisp.pl?gene=MIR372">https://www.genecards.org/cgi-bin/carddisp.pl?gene=MIR372</a>       |
| CLRN1-AS1 | CLRN1 Antisense RNA 1                                                       | RNA Gene       | 17 | GC03P150852 | 5.305912971 | <a href="https://www.genecards.org/cgi-bin/carddisp.pl?gene=CLRN1-AS1">https://www.genecards.org/cgi-bin/carddisp.pl?gene=CLRN1-AS1</a> |
| FAM107B   | Family With Sequence Similarity 107 Member B                                | Protein Coding | 34 | GC10M014519 | 5.301181793 | <a href="https://www.genecards.org/cgi-bin/carddisp.pl?gene=FAM107B">https://www.genecards.org/cgi-bin/carddisp.pl?gene=FAM107B</a>     |
| DNAJA1    | DnaJ Heat Shock Protein Family (Hsp40) Member A1                            | Protein Coding | 42 | GC09P033025 | 5.294562817 | <a href="https://www.genecards.org/cgi-bin/carddisp.pl?gene=DNAJA1">https://www.genecards.org/cgi-bin/carddisp.pl?gene=DNAJA1</a>       |
| DISC2     | Disrupted In Schizophrenia 2                                                | RNA Gene       | 19 | GC01M231814 | 5.283132076 | <a href="https://www.genecards.org/cgi-bin/carddisp.pl?gene=DISC2">https://www.genecards.org/cgi-bin/carddisp.pl?gene=DISC2</a>         |
| PPP1CA    | Protein Phosphatase 1 Catalytic Subunit Alpha                               | Protein Coding | 49 | GC11M069512 | 5.275168419 | <a href="https://www.genecards.org/cgi-bin/carddisp.pl?gene=PPP1CA">https://www.genecards.org/cgi-bin/carddisp.pl?gene=PPP1CA</a>       |
| ANXA9     | Annexin A9                                                                  | Protein Coding | 39 | GC01P150982 | 5.275134087 | <a href="https://www.genecards.org/cgi-bin/carddisp.pl?gene=ANXA9">https://www.genecards.org/cgi-bin/carddisp.pl?gene=ANXA9</a>         |
| SORCS2    | Sortilin Related VPS10 Domain Containing Receptor 2                         | Protein Coding | 36 | GC04P007196 | 5.270096779 | <a href="https://www.genecards.org/cgi-bin/carddisp.pl?gene=SORCS2">https://www.genecards.org/cgi-bin/carddisp.pl?gene=SORCS2</a>       |
| POMP      | Proteasome Maturation Protein                                               | Protein Coding | 43 | GC13P028659 | 5.260608932 | <a href="https://www.genecards.org/cgi-bin/carddisp.pl?gene=POMP">https://www.genecards.org/cgi-bin/carddisp.pl?gene=POMP</a>           |
| HNRNPM    | Heterogeneous Nuclear Ribonucleoprotein                                     | Protein Coding | 40 | GC19P008444 | 5.252953529 | <a href="https://www.genecards.org/cgi-bin/carddisp.pl?gene=HNRNPM">https://www.genecards.org/cgi-bin/carddisp.pl?gene=HNRNPM</a>       |
| GGT2      | Gamma-Glutamyltransferase 2                                                 | Protein Coding | 31 | GC22M021207 | 5.252270699 | <a href="https://www.genecards.org/cgi-bin/carddisp.pl?gene=GGT2">https://www.genecards.org/cgi-bin/carddisp.pl?gene=GGT2</a>           |
| TMBIM1    | Transmembrane BAX Inhibitor Motif Containing 1                              | Protein Coding | 36 | GC02M218274 | 5.24852562  | <a href="https://www.genecards.org/cgi-bin/carddisp.pl?gene=TMBIM1">https://www.genecards.org/cgi-bin/carddisp.pl?gene=TMBIM1</a>       |
| RPS2      | Ribosomal Protein S2                                                        | Protein Coding | 44 | GC16M003048 | 5.240426064 | <a href="https://www.genecards.org/cgi-bin/carddisp.pl?gene=RPS2">https://www.genecards.org/cgi-bin/carddisp.pl?gene=RPS2</a>           |
| SLC25A11  | Solute Carrier Family 25 Member 11                                          | Protein Coding | 44 | GC17M004937 | 5.220676422 | <a href="https://www.genecards.org/cgi-bin/carddisp.pl?gene=SLC25A11">https://www.genecards.org/cgi-bin/carddisp.pl?gene=SLC25A11</a>   |
| GPNI      | GPN-Loop GTPase 1                                                           | Protein Coding | 38 | GC02P027628 | 5.217983723 | <a href="https://www.genecards.org/cgi-bin/carddisp.pl?gene=GPNI">https://www.genecards.org/cgi-bin/carddisp.pl?gene=GPNI</a>           |
| CREB5     | CAMP Responsive Element Binding Protein 5                                   | Protein Coding | 41 | GC07P028305 | 5.2126894   | <a href="https://www.genecards.org/cgi-bin/carddisp.pl?gene=CREB5">https://www.genecards.org/cgi-bin/carddisp.pl?gene=CREB5</a>         |

|              |                                                                          |                   |    |             |             |                                                                                                                                               |
|--------------|--------------------------------------------------------------------------|-------------------|----|-------------|-------------|-----------------------------------------------------------------------------------------------------------------------------------------------|
| SERPINA4     | Serpin Family A Member 4                                                 | Protein Coding    | 41 | GC14P094561 | 5.211485863 | <a href="https://www.genecards.org/cgi-bin/carddisp.pl?gene=SERPINA4">https://www.genecards.org/cgi-bin/carddisp.pl?gene=SERPINA4</a>         |
| NDUFA3       | NADH:Ubiquinone Oxidoreductase Subunit A3                                | Protein Coding    | 39 | GC19P054102 | 5.203584194 | <a href="https://www.genecards.org/cgi-bin/carddisp.pl?gene=NDUFA3">https://www.genecards.org/cgi-bin/carddisp.pl?gene=NDUFA3</a>             |
| RPS9         | Ribosomal Protein S9                                                     | Protein Coding    | 43 | GC19P056806 | 5.202595234 | <a href="https://www.genecards.org/cgi-bin/carddisp.pl?gene=RPS9">https://www.genecards.org/cgi-bin/carddisp.pl?gene=RPS9</a>                 |
| BICD1        | BICD Cargo Adaptor 1                                                     | Protein Coding    | 40 | GC12P032107 | 5.194260597 | <a href="https://www.genecards.org/cgi-bin/carddisp.pl?gene=BICD1">https://www.genecards.org/cgi-bin/carddisp.pl?gene=BICD1</a>               |
| MYO18A       | Myosin XVIIIa                                                            | Protein Coding    | 38 | GC17M031089 | 5.183431625 | <a href="https://www.genecards.org/cgi-bin/carddisp.pl?gene=MYO18A">https://www.genecards.org/cgi-bin/carddisp.pl?gene=MYO18A</a>             |
| NRG4         | Neuregulin 4                                                             | Protein Coding    | 40 | GC15M075935 | 5.170539856 | <a href="https://www.genecards.org/cgi-bin/carddisp.pl?gene=NRG4">https://www.genecards.org/cgi-bin/carddisp.pl?gene=NRG4</a>                 |
| HTR1B        | 5-Hydroxytryptamine Receptor 1B                                          | Protein Coding    | 45 | GC06M077478 | 5.16864109  | <a href="https://www.genecards.org/cgi-bin/carddisp.pl?gene=HTR1B">https://www.genecards.org/cgi-bin/carddisp.pl?gene=HTR1B</a>               |
| HSPH1        | Heat Shock Protein Family H (Hsp110) Member 1                            | Protein Coding    | 44 | GC13M031134 | 5.168605804 | <a href="https://www.genecards.org/cgi-bin/carddisp.pl?gene=HSPH1">https://www.genecards.org/cgi-bin/carddisp.pl?gene=HSPH1</a>               |
| MIR449A      | MicroRNA 449a                                                            | RNA Gene          | 20 | GC05M055171 | 5.165687561 | <a href="https://www.genecards.org/cgi-bin/carddisp.pl?gene=MIR449A">https://www.genecards.org/cgi-bin/carddisp.pl?gene=MIR449A</a>           |
| IGF2BP1      | Insulin Like Growth Factor 2 MRNA Binding Protein 1                      | Protein Coding    | 41 | GC17P048997 | 5.164940834 | <a href="https://www.genecards.org/cgi-bin/carddisp.pl?gene=IGF2BP1">https://www.genecards.org/cgi-bin/carddisp.pl?gene=IGF2BP1</a>           |
| TRIM33       | Tripartite Motif Containing 33                                           | Protein Coding    | 44 | GC01M114392 | 5.159249306 | <a href="https://www.genecards.org/cgi-bin/carddisp.pl?gene=TRIM33">https://www.genecards.org/cgi-bin/carddisp.pl?gene=TRIM33</a>             |
| DDX1         | DEAD-Box Helicase 1                                                      | Protein Coding    | 44 | GC02P015591 | 5.139266014 | <a href="https://www.genecards.org/cgi-bin/carddisp.pl?gene=DDX1">https://www.genecards.org/cgi-bin/carddisp.pl?gene=DDX1</a>                 |
| CTPS1        | CTP Synthase 1                                                           | Protein Coding    | 45 | GC01P040979 | 5.113494873 | <a href="https://www.genecards.org/cgi-bin/carddisp.pl?gene=CTPS1">https://www.genecards.org/cgi-bin/carddisp.pl?gene=CTPS1</a>               |
| VIL1         | Villin 1                                                                 | Protein Coding    | 40 | GC02P218419 | 5.110589027 | <a href="https://www.genecards.org/cgi-bin/carddisp.pl?gene=VIL1">https://www.genecards.org/cgi-bin/carddisp.pl?gene=VIL1</a>                 |
| AGAP1        | ArfGAP With GTPase Domain, Ankyrin Repeat And PH Domain 1                | Protein Coding    | 41 | GC02P235494 | 5.070719242 | <a href="https://www.genecards.org/cgi-bin/carddisp.pl?gene=AGAP1">https://www.genecards.org/cgi-bin/carddisp.pl?gene=AGAP1</a>               |
| HNRNPA3      | Heterogeneous Nuclear Ribonucleoprotein A3                               | Protein Coding    | 38 | GC02P177212 | 5.062342644 | <a href="https://www.genecards.org/cgi-bin/carddisp.pl?gene=HNRNPA3">https://www.genecards.org/cgi-bin/carddisp.pl?gene=HNRNPA3</a>           |
| TUBA8        | Tubulin Alpha 8                                                          | Protein Coding    | 45 | GC22P018110 | 5.061789989 | <a href="https://www.genecards.org/cgi-bin/carddisp.pl?gene=TUBA8">https://www.genecards.org/cgi-bin/carddisp.pl?gene=TUBA8</a>               |
| CCAR2        | Cell Cycle And Apoptosis Regulator 2                                     | Protein Coding    | 37 | GC08P022604 | 5.053204536 | <a href="https://www.genecards.org/cgi-bin/carddisp.pl?gene=CCAR2">https://www.genecards.org/cgi-bin/carddisp.pl?gene=CCAR2</a>               |
| AHSA1        | Activator Of HSP90 ATPase Activity 1                                     | Protein Coding    | 40 | GC14P077457 | 5.047645569 | <a href="https://www.genecards.org/cgi-bin/carddisp.pl?gene=AHSA1">https://www.genecards.org/cgi-bin/carddisp.pl?gene=AHSA1</a>               |
| RANGAP1      | Ran GTPase Activating Protein 1                                          | Protein Coding    | 43 | GC22M041244 | 5.045892715 | <a href="https://www.genecards.org/cgi-bin/carddisp.pl?gene=RANGAP1">https://www.genecards.org/cgi-bin/carddisp.pl?gene=RANGAP1</a>           |
| DHX9         | DExH-Box Helicase 9                                                      | Protein Coding    | 41 | GC01P182839 | 5.045092583 | <a href="https://www.genecards.org/cgi-bin/carddisp.pl?gene=DHX9">https://www.genecards.org/cgi-bin/carddisp.pl?gene=DHX9</a>                 |
| HNRNPUL1     | Heterogeneous Nuclear Ribonucleoprotein U Like 1                         | Protein Coding    | 38 | GC19P041262 | 5.025044441 | <a href="https://www.genecards.org/cgi-bin/carddisp.pl?gene=HNRNPUL1">https://www.genecards.org/cgi-bin/carddisp.pl?gene=HNRNPUL1</a>         |
| TMSB4X       | Thymosin Beta 4 X-Linked                                                 | Protein Coding    | 40 | GC0XP012975 | 5.0191679   | <a href="https://www.genecards.org/cgi-bin/carddisp.pl?gene=TMSB4X">https://www.genecards.org/cgi-bin/carddisp.pl?gene=TMSB4X</a>             |
| CRTC1        | CREB Regulated Transcription                                             | Protein Coding    | 43 | GC19P026660 | 5.003367901 | <a href="https://www.genecards.org/cgi-bin/carddisp.pl?gene=CRTC1">https://www.genecards.org/cgi-bin/carddisp.pl?gene=CRTC1</a>               |
| TNFRSF12A    | TNF Receptor Superfamily Member 12A                                      | Protein Coding    | 44 | GC16P003018 | 5.002279282 | <a href="https://www.genecards.org/cgi-bin/carddisp.pl?gene=TNFRSF12A">https://www.genecards.org/cgi-bin/carddisp.pl?gene=TNFRSF12A</a>       |
| TARBP1       | TAR (HIV-1) RNA Binding Protein 1                                        | Protein Coding    | 39 | GC01M234391 | 4.99900341  | <a href="https://www.genecards.org/cgi-bin/carddisp.pl?gene=TARBP1">https://www.genecards.org/cgi-bin/carddisp.pl?gene=TARBP1</a>             |
| LEPROT       | Leptin Receptor Overlapping Transcript                                   | Protein Coding    | 33 | GC01P065420 | 4.961866379 | <a href="https://www.genecards.org/cgi-bin/carddisp.pl?gene=LEPROT">https://www.genecards.org/cgi-bin/carddisp.pl?gene=LEPROT</a>             |
| NFE2         | Nuclear Factor, Erythroid 2                                              | Protein Coding    | 41 | GC12M054292 | 4.958201885 | <a href="https://www.genecards.org/cgi-bin/carddisp.pl?gene=NFE2">https://www.genecards.org/cgi-bin/carddisp.pl?gene=NFE2</a>                 |
| BBC3         | BCL2 Binding Component 3                                                 | Protein Coding    | 41 | GC19M047220 | 4.95677948  | <a href="https://www.genecards.org/cgi-bin/carddisp.pl?gene=BBC3">https://www.genecards.org/cgi-bin/carddisp.pl?gene=BBC3</a>                 |
| ITSN1        | Intersectin 1                                                            | Protein Coding    | 42 | GC21P033642 | 4.940186977 | <a href="https://www.genecards.org/cgi-bin/carddisp.pl?gene=ITSN1">https://www.genecards.org/cgi-bin/carddisp.pl?gene=ITSN1</a>               |
| COX6C        | Cytochrome C Oxidase Subunit 6C                                          | Protein Coding    | 40 | GC08M099899 | 4.936024189 | <a href="https://www.genecards.org/cgi-bin/carddisp.pl?gene=COX6C">https://www.genecards.org/cgi-bin/carddisp.pl?gene=COX6C</a>               |
| NDUFB4       | NADH:Ubiquinone Oxidoreductase Subunit B4                                | Protein Coding    | 41 | GC03P120596 | 4.91838977  | <a href="https://www.genecards.org/cgi-bin/carddisp.pl?gene=NDUFB4">https://www.genecards.org/cgi-bin/carddisp.pl?gene=NDUFB4</a>             |
| DDX5         | DEAD-Box Helicase 5                                                      | Protein Coding    | 47 | GC17M064498 | 4.91580677  | <a href="https://www.genecards.org/cgi-bin/carddisp.pl?gene=DDX5">https://www.genecards.org/cgi-bin/carddisp.pl?gene=DDX5</a>                 |
| POLR3H       | RNA Polymerase III Subunit H                                             | Protein Coding    | 38 | GC22M041525 | 4.915407658 | <a href="https://www.genecards.org/cgi-bin/carddisp.pl?gene=POLR3H">https://www.genecards.org/cgi-bin/carddisp.pl?gene=POLR3H</a>             |
| APPL2        | Adaptor Protein, Phosphotyrosine Interacting With PH Domain And Leucine  | Protein Coding    | 36 | GC12M105173 | 4.913758278 | <a href="https://www.genecards.org/cgi-bin/carddisp.pl?gene=APPL2">https://www.genecards.org/cgi-bin/carddisp.pl?gene=APPL2</a>               |
| RPS4X        | Ribosomal Protein S4 X-Linked                                            | Protein Coding    | 40 | GC0XM072255 | 4.906749725 | <a href="https://www.genecards.org/cgi-bin/carddisp.pl?gene=RPS4X">https://www.genecards.org/cgi-bin/carddisp.pl?gene=RPS4X</a>               |
| PNPLA7       | Patatin Like Phospholipase Domain Containing 7                           | Protein Coding    | 34 | GC09M137459 | 4.905105591 | <a href="https://www.genecards.org/cgi-bin/carddisp.pl?gene=PNPLA7">https://www.genecards.org/cgi-bin/carddisp.pl?gene=PNPLA7</a>             |
| DDX60L       | DExD/H-Box 60 Like                                                       | Protein Coding    | 33 | GC04M168356 | 4.903104782 | <a href="https://www.genecards.org/cgi-bin/carddisp.pl?gene=DDX60L">https://www.genecards.org/cgi-bin/carddisp.pl?gene=DDX60L</a>             |
| PSG1         | Pregnancy Specific Beta-1-Glycoprotein 1                                 | Protein Coding    | 39 | GC19M042866 | 4.901046753 | <a href="https://www.genecards.org/cgi-bin/carddisp.pl?gene=PSG1">https://www.genecards.org/cgi-bin/carddisp.pl?gene=PSG1</a>                 |
| FOXK1        | Forkhead Box K1                                                          | Protein Coding    | 35 | GC07P004682 | 4.887200832 | <a href="https://www.genecards.org/cgi-bin/carddisp.pl?gene=FOXK1">https://www.genecards.org/cgi-bin/carddisp.pl?gene=FOXK1</a>               |
| MCM5         | Minichromosome Maintenance Complex Component 5                           | Protein Coding    | 46 | GC22P035400 | 4.884897232 | <a href="https://www.genecards.org/cgi-bin/carddisp.pl?gene=MCM5">https://www.genecards.org/cgi-bin/carddisp.pl?gene=MCM5</a>                 |
| RPS3A        | Ribosomal Protein S3A                                                    | Protein Coding    | 42 | GC04P151099 | 4.882931709 | <a href="https://www.genecards.org/cgi-bin/carddisp.pl?gene=RPS3A">https://www.genecards.org/cgi-bin/carddisp.pl?gene=RPS3A</a>               |
| RPL4         | Ribosomal Protein L4                                                     | Protein Coding    | 43 | GC15M066498 | 4.865651131 | <a href="https://www.genecards.org/cgi-bin/carddisp.pl?gene=RPL4">https://www.genecards.org/cgi-bin/carddisp.pl?gene=RPL4</a>                 |
| RPL8         | Ribosomal Protein L8                                                     | Protein Coding    | 42 | GC08M144821 | 4.859796047 | <a href="https://www.genecards.org/cgi-bin/carddisp.pl?gene=RPL8">https://www.genecards.org/cgi-bin/carddisp.pl?gene=RPL8</a>                 |
| HNRNPUL1     | Heterogeneous Nuclear Ribonucleoprotein U Like 1                         | Protein Coding    | 40 | GC19M038836 | 4.852230072 | <a href="https://www.genecards.org/cgi-bin/carddisp.pl?gene=HNRNPUL1">https://www.genecards.org/cgi-bin/carddisp.pl?gene=HNRNPUL1</a>         |
| RPL9         | Ribosomal Protein L9                                                     | Protein Coding    | 43 | GC04M039452 | 4.850320816 | <a href="https://www.genecards.org/cgi-bin/carddisp.pl?gene=RPL9">https://www.genecards.org/cgi-bin/carddisp.pl?gene=RPL9</a>                 |
| MCM7         | Minichromosome Maintenance Complex Component 7                           | Protein Coding    | 45 | GC07M100092 | 4.847979546 | <a href="https://www.genecards.org/cgi-bin/carddisp.pl?gene=MCM7">https://www.genecards.org/cgi-bin/carddisp.pl?gene=MCM7</a>                 |
| C1QTNF1      | C1q And TNF Related 1                                                    | Protein Coding    | 40 | GC17P079022 | 4.838021278 | <a href="https://www.genecards.org/cgi-bin/carddisp.pl?gene=C1QTNF1">https://www.genecards.org/cgi-bin/carddisp.pl?gene=C1QTNF1</a>           |
| SLC23A1      | Solute Carrier Family 23 Member 1                                        | Protein Coding    | 43 | GC05M139377 | 4.825004639 | <a href="https://www.genecards.org/cgi-bin/carddisp.pl?gene=SLC23A1">https://www.genecards.org/cgi-bin/carddisp.pl?gene=SLC23A1</a>           |
| CCN4         | Cellular Communication Network Factor 4                                  | Protein Coding    | 31 | GC08P133192 | 4.817196369 | <a href="https://www.genecards.org/cgi-bin/carddisp.pl?gene=CCN4">https://www.genecards.org/cgi-bin/carddisp.pl?gene=CCN4</a>                 |
| POLR2D       | RNA Polymerase II Subunit D                                              | Protein Coding    | 43 | GC02M128042 | 4.811548233 | <a href="https://www.genecards.org/cgi-bin/carddisp.pl?gene=POLR2D">https://www.genecards.org/cgi-bin/carddisp.pl?gene=POLR2D</a>             |
| SEL1L3       | SEL1L Family Member 3                                                    | Protein Coding    | 33 | GC04M025715 | 4.793689728 | <a href="https://www.genecards.org/cgi-bin/carddisp.pl?gene=SEL1L3">https://www.genecards.org/cgi-bin/carddisp.pl?gene=SEL1L3</a>             |
| STK24        | Serine/Threonine Kinase 24                                               | Protein Coding    | 45 | GC13M098445 | 4.78702879  | <a href="https://www.genecards.org/cgi-bin/carddisp.pl?gene=STK24">https://www.genecards.org/cgi-bin/carddisp.pl?gene=STK24</a>               |
| PGAM5        | PGAM Family Member 5, Mitochondrial Serine/Threonine Protein Phosphatase | Protein Coding    | 34 | GC12P132710 | 4.785676479 | <a href="https://www.genecards.org/cgi-bin/carddisp.pl?gene=PGAM5">https://www.genecards.org/cgi-bin/carddisp.pl?gene=PGAM5</a>               |
| STX17        | Syntaxin 17                                                              | Protein Coding    | 36 | GC09P099906 | 4.774443626 | <a href="https://www.genecards.org/cgi-bin/carddisp.pl?gene=STX17">https://www.genecards.org/cgi-bin/carddisp.pl?gene=STX17</a>               |
| AP2A2        | Adaptor Related Protein Complex 2 Subunit Alpha 2                        | Protein Coding    | 38 | GC11P000924 | 4.773753166 | <a href="https://www.genecards.org/cgi-bin/carddisp.pl?gene=AP2A2">https://www.genecards.org/cgi-bin/carddisp.pl?gene=AP2A2</a>               |
| CCT4         | Chaperonin Containing TCP1 Subunit 4                                     | Protein Coding    | 40 | GC02M061868 | 4.761928558 | <a href="https://www.genecards.org/cgi-bin/carddisp.pl?gene=CCT4">https://www.genecards.org/cgi-bin/carddisp.pl?gene=CCT4</a>                 |
| MCF2L2       | MCF.2 Cell Line Derived Transforming Sequence-Like 2                     | Protein Coding    | 34 | GC03M183183 | 4.754241943 | <a href="https://www.genecards.org/cgi-bin/carddisp.pl?gene=MCF2L2">https://www.genecards.org/cgi-bin/carddisp.pl?gene=MCF2L2</a>             |
| NDUFB5       | NADH:Ubiquinone Oxidoreductase Subunit B5                                | Protein Coding    | 37 | GC03P179604 | 4.746250153 | <a href="https://www.genecards.org/cgi-bin/carddisp.pl?gene=NDUFB5">https://www.genecards.org/cgi-bin/carddisp.pl?gene=NDUFB5</a>             |
| TXNL1        | Thioredoxin Like 1                                                       | Protein Coding    | 40 | GC18M056597 | 4.729324341 | <a href="https://www.genecards.org/cgi-bin/carddisp.pl?gene=TXNL1">https://www.genecards.org/cgi-bin/carddisp.pl?gene=TXNL1</a>               |
| STMP1        | Short Transmembrane Mitochondrial Protein 1                              | Protein Coding    | 22 | GC07P135671 | 4.714742661 | <a href="https://www.genecards.org/cgi-bin/carddisp.pl?gene=STMP1">https://www.genecards.org/cgi-bin/carddisp.pl?gene=STMP1</a>               |
| MYO1D        | Myosin ID                                                                | Protein Coding    | 40 | GC17M032492 | 4.709003448 | <a href="https://www.genecards.org/cgi-bin/carddisp.pl?gene=MYO1D">https://www.genecards.org/cgi-bin/carddisp.pl?gene=MYO1D</a>               |
| QARS1        | Glutaminyl-TRNA Synthetase 1                                             | Protein Coding    | 26 | GC03M049445 | 4.708961487 | <a href="https://www.genecards.org/cgi-bin/carddisp.pl?gene=QARS1">https://www.genecards.org/cgi-bin/carddisp.pl?gene=QARS1</a>               |
| UQCRH        | Ubiquinol-Cytochrome C Reductase Hinge Protein                           | Protein Coding    | 38 | GC01P046303 | 4.708562851 | <a href="https://www.genecards.org/cgi-bin/carddisp.pl?gene=UQCRH">https://www.genecards.org/cgi-bin/carddisp.pl?gene=UQCRH</a>               |
| NDUFB2       | NADH:Ubiquinone Oxidoreductase Subunit B2                                | Protein Coding    | 40 | GC07P140690 | 4.6989398   | <a href="https://www.genecards.org/cgi-bin/carddisp.pl?gene=NDUFB2">https://www.genecards.org/cgi-bin/carddisp.pl?gene=NDUFB2</a>             |
| SNRPD2       | Small Nuclear Ribonucleoprotein D2 Polypeptide                           | Protein Coding    | 41 | GC19M046999 | 4.662291527 | <a href="https://www.genecards.org/cgi-bin/carddisp.pl?gene=SNRPD2">https://www.genecards.org/cgi-bin/carddisp.pl?gene=SNRPD2</a>             |
| LOC110366354 | CYP3A4 5' Regulatory Region                                              | Biological Region | 1  | GC07P099784 | 4.662278175 | <a href="https://www.genecards.org/cgi-bin/carddisp.pl?gene=LOC110366354">https://www.genecards.org/cgi-bin/carddisp.pl?gene=LOC110366354</a> |
| CAND1        | Cullin Associated And Neddylaton Dissociated 1                           | Protein Coding    | 39 | GC12P067270 | 4.631176949 | <a href="https://www.genecards.org/cgi-bin/carddisp.pl?gene=CAND1">https://www.genecards.org/cgi-bin/carddisp.pl?gene=CAND1</a>               |
| SLC23A2      | Solute Carrier Family 23 Member 2                                        | Protein Coding    | 43 | GC20M004852 | 4.628893852 | <a href="https://www.genecards.org/cgi-bin/carddisp.pl?gene=SLC23A2">https://www.genecards.org/cgi-bin/carddisp.pl?gene=SLC23A2</a>           |
| ORM1         | Orosomucoid 1                                                            | Protein Coding    | 40 | GC09P114323 | 4.628304482 | <a href="https://www.genecards.org/cgi-bin/carddisp.pl?gene=ORM1">https://www.genecards.org/cgi-bin/carddisp.pl?gene=ORM1</a>                 |
| RPL24        | Ribosomal Protein L24                                                    | Protein Coding    | 40 | GC03M101681 | 4.617097855 | <a href="https://www.genecards.org/cgi-bin/carddisp.pl?gene=RPL24">https://www.genecards.org/cgi-bin/carddisp.pl?gene=RPL24</a>               |
| ILF3         | Interleukin Enhancer Binding Factor 3                                    | Protein Coding    | 39 | GC19P010625 | 4.615589619 | <a href="https://www.genecards.org/cgi-bin/carddisp.pl?gene=ILF3">https://www.genecards.org/cgi-bin/carddisp.pl?gene=ILF3</a>                 |
| CRACR2A      | Calcium Release Activated Channel Regulator 2A                           | Protein Coding    | 31 | GC12M004349 | 4.615138054 | <a href="https://www.genecards.org/cgi-bin/carddisp.pl?gene=CRACR2A">https://www.genecards.org/cgi-bin/carddisp.pl?gene=CRACR2A</a>           |
| ARRDC3       | Arrestin Domain Containing 3                                             | Protein Coding    | 38 | GC05M091368 | 4.61058006  | <a href="https://www.genecards.org/cgi-bin/carddisp.pl?gene=ARRDC3">https://www.genecards.org/cgi-bin/carddisp.pl?gene=ARRDC3</a>             |
| SLC30A6      | Solute Carrier Family 30 Member 6                                        | Protein Coding    | 39 | GC02P032166 | 4.592472553 | <a href="https://www.genecards.org/cgi-bin/carddisp.pl?gene=SLC30A6">https://www.genecards.org/cgi-bin/carddisp.pl?gene=SLC30A6</a>           |
| ACTR2        | Actin Related Protein 2                                                  | Protein Coding    | 44 | GC02P065227 | 4.58913517  | <a href="https://www.genecards.org/cgi-bin/carddisp.pl?gene=ACTR2">https://www.genecards.org/cgi-bin/carddisp.pl?gene=ACTR2</a>               |
| RUVBL1       | RuvB Like AAA ATPase 1                                                   | Protein Coding    | 45 | GC03M128064 | 4.578635216 | <a href="https://www.genecards.org/cgi-bin/carddisp.pl?gene=RUVBL1">https://www.genecards.org/cgi-bin/carddisp.pl?gene=RUVBL1</a>             |
| EDC4         | Enhancer Of MRNA Decapping 4                                             | Protein Coding    | 39 | GC16P067873 | 4.578551292 | <a href="https://www.genecards.org/cgi-bin/carddisp.pl?gene=EDC4">https://www.genecards.org/cgi-bin/carddisp.pl?gene=EDC4</a>                 |
| G0S2         | G0/G1 Switch 2                                                           | Protein Coding    | 33 | GC01P209675 | 4.57546711  | <a href="https://www.genecards.org/cgi-bin/carddisp.pl?gene=G0S2">https://www.genecards.org/cgi-bin/carddisp.pl?gene=G0S2</a>                 |
| RNF114       | Ring Finger Protein 114                                                  | Protein Coding    | 40 | GC20P049936 | 4.564092636 | <a href="https://www.genecards.org/cgi-bin/carddisp.pl?gene=RNF114">https://www.genecards.org/cgi-bin/carddisp.pl?gene=RNF114</a>             |
| HKDC1        | Hexokinase Domain Containing 1                                           | Protein Coding    | 41 | GC10P069220 | 4.553481102 | <a href="https://www.genecards.org/cgi-bin/carddisp.pl?gene=HKDC1">https://www.genecards.org/cgi-bin/carddisp.pl?gene=HKDC1</a>               |
| NDUFV3       | NADH:Ubiquinone Oxidoreductase Subunit V3                                | Protein Coding    | 41 | GC21P042879 | 4.547256947 | <a href="https://www.genecards.org/cgi-bin/carddisp.pl?gene=NDUFV3">https://www.genecards.org/cgi-bin/carddisp.pl?gene=NDUFV3</a>             |
| EIF4A3       | Eukaryotic Translation Initiation Factor                                 | Protein Coding    | 44 | GC17M080135 | 4.542392731 | <a href="https://www.genecards.org/cgi-bin/carddisp.pl?gene=EIF4A3">https://www.genecards.org/cgi-bin/carddisp.pl?gene=EIF4A3</a>             |
| TP53BP2      | Tumor Protein P53 Binding Protein 2                                      | Protein Coding    | 43 | GC01M223779 | 4.541913986 | <a href="https://www.genecards.org/cgi-bin/carddisp.pl?gene=TP53BP2">https://www.genecards.org/cgi-bin/carddisp.pl?gene=TP53BP2</a>           |

|              |                                                                              |                |    |             |             |                                                                                                                                               |
|--------------|------------------------------------------------------------------------------|----------------|----|-------------|-------------|-----------------------------------------------------------------------------------------------------------------------------------------------|
| TLCD4-RWDD3  | TLCD4-RWDD3 Readthrough                                                      | Protein Coding | 16 | GC01P095119 | 4.539422035 | <a href="https://www.genecards.org/cgi-bin/carddisp.pl?gene=TLCD4-RWDD3">https://www.genecards.org/cgi-bin/carddisp.pl?gene=TLCD4-RWDD3</a>   |
| PLPPR4       | Phospholipid Phosphatase Related 4                                           | Protein Coding | 31 | GC01P099262 | 4.529919624 | <a href="https://www.genecards.org/cgi-bin/carddisp.pl?gene=PLPPR4">https://www.genecards.org/cgi-bin/carddisp.pl?gene=PLPPR4</a>             |
| COX7C        | Cytochrome C Oxidase Subunit 7C                                              | Protein Coding | 38 | GC05P086617 | 4.528826714 | <a href="https://www.genecards.org/cgi-bin/carddisp.pl?gene=COX7C">https://www.genecards.org/cgi-bin/carddisp.pl?gene=COX7C</a>               |
| PDIA4        | Protein Disulfide Isomerase Family A Member 4                                | Protein Coding | 43 | GC07M149003 | 4.506326199 | <a href="https://www.genecards.org/cgi-bin/carddisp.pl?gene=PDIA4">https://www.genecards.org/cgi-bin/carddisp.pl?gene=PDIA4</a>               |
| NDUFC1       | NADH:Ubiquinone Oxidoreductase Subunit C1                                    | Protein Coding | 36 | GC04M139267 | 4.505256176 | <a href="https://www.genecards.org/cgi-bin/carddisp.pl?gene=NDUFC1">https://www.genecards.org/cgi-bin/carddisp.pl?gene=NDUFC1</a>             |
| SERPINB4     | Serpin Family B Member 4                                                     | Protein Coding | 39 | GC18M063637 | 4.496322632 | <a href="https://www.genecards.org/cgi-bin/carddisp.pl?gene=SERPINB4">https://www.genecards.org/cgi-bin/carddisp.pl?gene=SERPINB4</a>         |
| NUCB2        | Nucleobindin 2                                                               | Protein Coding | 39 | GC11P017237 | 4.483721733 | <a href="https://www.genecards.org/cgi-bin/carddisp.pl?gene=NUCB2">https://www.genecards.org/cgi-bin/carddisp.pl?gene=NUCB2</a>               |
| MIR873       | MicroRNA.873                                                                 | RNA Gene       | 16 | GC09M028880 | 4.47608757  | <a href="https://www.genecards.org/cgi-bin/carddisp.pl?gene=MIR873">https://www.genecards.org/cgi-bin/carddisp.pl?gene=MIR873</a>             |
| SFRP5        | Secreted Frizzled Related Protein 5                                          | Protein Coding | 40 | GC10M097766 | 4.475298405 | <a href="https://www.genecards.org/cgi-bin/carddisp.pl?gene=SFRP5">https://www.genecards.org/cgi-bin/carddisp.pl?gene=SFRP5</a>               |
| SLC30A9      | Solute Carrier Family 30 Member 9                                            | Protein Coding | 42 | GC04P041992 | 4.474620819 | <a href="https://www.genecards.org/cgi-bin/carddisp.pl?gene=SLC30A9">https://www.genecards.org/cgi-bin/carddisp.pl?gene=SLC30A9</a>           |
| COX7A1       | Cytochrome C Oxidase Subunit 7A1                                             | Protein Coding | 37 | GC19M047084 | 4.4688344   | <a href="https://www.genecards.org/cgi-bin/carddisp.pl?gene=COX7A1">https://www.genecards.org/cgi-bin/carddisp.pl?gene=COX7A1</a>             |
| SRSF7        | Serine And Arginine Rich Splicing Factor                                     | Protein Coding | 40 | GC02M038743 | 4.464326859 | <a href="https://www.genecards.org/cgi-bin/carddisp.pl?gene=SRSF7">https://www.genecards.org/cgi-bin/carddisp.pl?gene=SRSF7</a>               |
| PKNOX1       | PBX/Knotted 1 Homeobox 1                                                     | Protein Coding | 41 | GC21P042974 | 4.461466312 | <a href="https://www.genecards.org/cgi-bin/carddisp.pl?gene=PKNOX1">https://www.genecards.org/cgi-bin/carddisp.pl?gene=PKNOX1</a>             |
| SP4          | Sp4 Transcription Factor                                                     | Protein Coding | 42 | GC07P021434 | 4.449212074 | <a href="https://www.genecards.org/cgi-bin/carddisp.pl?gene=SP4">https://www.genecards.org/cgi-bin/carddisp.pl?gene=SP4</a>                   |
| TUBA1C       | Tubulin Alpha 1c                                                             | Protein Coding | 41 | GC12P049188 | 4.431495667 | <a href="https://www.genecards.org/cgi-bin/carddisp.pl?gene=TUBA1C">https://www.genecards.org/cgi-bin/carddisp.pl?gene=TUBA1C</a>             |
| SEC16B       | SEC16 Homolog B, Endoplasmic Reticulum Export Factor                         | Protein Coding | 38 | GC01M177923 | 4.420809269 | <a href="https://www.genecards.org/cgi-bin/carddisp.pl?gene=SEC16B">https://www.genecards.org/cgi-bin/carddisp.pl?gene=SEC16B</a>             |
| CILP2        | Cartilage Intermediate Layer Protein 2                                       | Protein Coding | 37 | GC19P019538 | 4.416835785 | <a href="https://www.genecards.org/cgi-bin/carddisp.pl?gene=CILP2">https://www.genecards.org/cgi-bin/carddisp.pl?gene=CILP2</a>               |
| EIF4A1       | Eukaryotic Translation Initiation Factor                                     | Protein Coding | 45 | GC17P007572 | 4.408568859 | <a href="https://www.genecards.org/cgi-bin/carddisp.pl?gene=EIF4A1">https://www.genecards.org/cgi-bin/carddisp.pl?gene=EIF4A1</a>             |
| GATAD2A      | GATA Zinc Finger Domain Containing 2A                                        | Protein Coding | 39 | GC19P026663 | 4.395526886 | <a href="https://www.genecards.org/cgi-bin/carddisp.pl?gene=GATAD2A">https://www.genecards.org/cgi-bin/carddisp.pl?gene=GATAD2A</a>           |
| AP2A1        | Adaptor Related Protein Complex 2 Subunit Alpha 1                            | Protein Coding | 40 | GC19P049766 | 4.384301186 | <a href="https://www.genecards.org/cgi-bin/carddisp.pl?gene=AP2A1">https://www.genecards.org/cgi-bin/carddisp.pl?gene=AP2A1</a>               |
| ZNF512       | Zinc Finger Protein 512                                                      | Protein Coding | 32 | GC02P027582 | 4.382470131 | <a href="https://www.genecards.org/cgi-bin/carddisp.pl?gene=ZNF512">https://www.genecards.org/cgi-bin/carddisp.pl?gene=ZNF512</a>             |
| PABIR1       | PP2A Aalpha (PPP2R1A) And B55A (PPP2R2A) Interacting Phosphatase Regulator 1 | Protein Coding | 25 | GC09P068781 | 4.370363235 | <a href="https://www.genecards.org/cgi-bin/carddisp.pl?gene=PABIR1">https://www.genecards.org/cgi-bin/carddisp.pl?gene=PABIR1</a>             |
| MTARC1       | Mitochondrial Amidoxime Reducing Component 1                                 | Protein Coding | 28 | GC01P220788 | 4.330311775 | <a href="https://www.genecards.org/cgi-bin/carddisp.pl?gene=MTARC1">https://www.genecards.org/cgi-bin/carddisp.pl?gene=MTARC1</a>             |
| NDUFA7       | NADH:Ubiquinone Oxidoreductase Subunit A7                                    | Protein Coding | 38 | GC19M008308 | 4.325894356 | <a href="https://www.genecards.org/cgi-bin/carddisp.pl?gene=NDUFA7">https://www.genecards.org/cgi-bin/carddisp.pl?gene=NDUFA7</a>             |
| SEN3         | SUMO Specific Peptidase 3                                                    | Protein Coding | 40 | GC17P009106 | 4.298048973 | <a href="https://www.genecards.org/cgi-bin/carddisp.pl?gene=SEN3">https://www.genecards.org/cgi-bin/carddisp.pl?gene=SEN3</a>                 |
| LOC101928118 | Uncharacterized LOC101928118                                                 | RNA Gene       | 11 | GC01M095163 | 4.28229332  | <a href="https://www.genecards.org/cgi-bin/carddisp.pl?gene=LOC101928118">https://www.genecards.org/cgi-bin/carddisp.pl?gene=LOC101928118</a> |
| ACTR3        | Actin Related Protein 3                                                      | Protein Coding | 43 | GC02P113889 | 4.277811527 | <a href="https://www.genecards.org/cgi-bin/carddisp.pl?gene=ACTR3">https://www.genecards.org/cgi-bin/carddisp.pl?gene=ACTR3</a>               |
| GRIK3        | Glutamate Ionotropic Receptor Kainate Type Subunit 3                         | Protein Coding | 43 | GC01M036795 | 4.268043041 | <a href="https://www.genecards.org/cgi-bin/carddisp.pl?gene=GRIK3">https://www.genecards.org/cgi-bin/carddisp.pl?gene=GRIK3</a>               |
| SIRT7        | Sirtuin 7                                                                    | Protein Coding | 42 | GC17M081911 | 4.255383492 | <a href="https://www.genecards.org/cgi-bin/carddisp.pl?gene=SIRT7">https://www.genecards.org/cgi-bin/carddisp.pl?gene=SIRT7</a>               |
| MIR1296      | MicroRNA.1296                                                                | RNA Gene       | 16 | GC10M063372 | 4.224890232 | <a href="https://www.genecards.org/cgi-bin/carddisp.pl?gene=MIR1296">https://www.genecards.org/cgi-bin/carddisp.pl?gene=MIR1296</a>           |
| C2orf16      | Chromosome 2 Open Reading Frame 16                                           | Protein Coding | 27 | GC02P027611 | 4.216482639 | <a href="https://www.genecards.org/cgi-bin/carddisp.pl?gene=C2orf16">https://www.genecards.org/cgi-bin/carddisp.pl?gene=C2orf16</a>           |
| CCT8         | Chaperonin Containing TCP1 Subunit 8                                         | Protein Coding | 40 | GC21M029055 | 4.197618484 | <a href="https://www.genecards.org/cgi-bin/carddisp.pl?gene=CCT8">https://www.genecards.org/cgi-bin/carddisp.pl?gene=CCT8</a>                 |
| RWDD3        | RWD Domain Containing 3                                                      | Protein Coding | 36 | GC01P095171 | 4.196980476 | <a href="https://www.genecards.org/cgi-bin/carddisp.pl?gene=RWDD3">https://www.genecards.org/cgi-bin/carddisp.pl?gene=RWDD3</a>               |
| COX8C        | Cytochrome C Oxidase Subunit 8C                                              | Protein Coding | 32 | GC14P093348 | 4.193313122 | <a href="https://www.genecards.org/cgi-bin/carddisp.pl?gene=COX8C">https://www.genecards.org/cgi-bin/carddisp.pl?gene=COX8C</a>               |
| SDK1         | Sidekick Cell Adhesion Molecule 1                                            | Protein Coding | 36 | GC07P003307 | 4.189126968 | <a href="https://www.genecards.org/cgi-bin/carddisp.pl?gene=SDK1">https://www.genecards.org/cgi-bin/carddisp.pl?gene=SDK1</a>                 |
| BMP8B        | Bone Morphogenetic Protein 8b                                                | Protein Coding | 39 | GC01P039757 | 4.175535202 | <a href="https://www.genecards.org/cgi-bin/carddisp.pl?gene=BMP8B">https://www.genecards.org/cgi-bin/carddisp.pl?gene=BMP8B</a>               |
| NDUFB1       | NADH:Ubiquinone Oxidoreductase Subunit B1                                    | Protein Coding | 37 | GC14M092116 | 4.166594505 | <a href="https://www.genecards.org/cgi-bin/carddisp.pl?gene=NDUFB1">https://www.genecards.org/cgi-bin/carddisp.pl?gene=NDUFB1</a>             |
| TEX36        | Testis Expressed 36                                                          | Protein Coding | 29 | GC10M125576 | 4.156787872 | <a href="https://www.genecards.org/cgi-bin/carddisp.pl?gene=TEX36">https://www.genecards.org/cgi-bin/carddisp.pl?gene=TEX36</a>               |
| EIF3B        | Eukaryotic Translation Initiation Factor 3 Subunit B                         | Protein Coding | 40 | GC07P002354 | 4.150002003 | <a href="https://www.genecards.org/cgi-bin/carddisp.pl?gene=EIF3B">https://www.genecards.org/cgi-bin/carddisp.pl?gene=EIF3B</a>               |
| DDX50        | DEX-Box Helicase 50                                                          | Protein Coding | 40 | GC10P068901 | 4.144034386 | <a href="https://www.genecards.org/cgi-bin/carddisp.pl?gene=DDX50">https://www.genecards.org/cgi-bin/carddisp.pl?gene=DDX50</a>               |
| PSME2        | Proteasome Activator Subunit 2                                               | Protein Coding | 43 | GC14M024143 | 4.14070797  | <a href="https://www.genecards.org/cgi-bin/carddisp.pl?gene=PSME2">https://www.genecards.org/cgi-bin/carddisp.pl?gene=PSME2</a>               |
| NUDT21       | Nudix Hydrolase 21                                                           | Protein Coding | 38 | GC16M056429 | 4.132987022 | <a href="https://www.genecards.org/cgi-bin/carddisp.pl?gene=NUDT21">https://www.genecards.org/cgi-bin/carddisp.pl?gene=NUDT21</a>             |
| OPRD1        | Opioid Receptor Delta 1                                                      | Protein Coding | 45 | GC01P028812 | 4.123717785 | <a href="https://www.genecards.org/cgi-bin/carddisp.pl?gene=OPRD1">https://www.genecards.org/cgi-bin/carddisp.pl?gene=OPRD1</a>               |
| FAM171A1     | Family With Sequence Similarity 171 Member A1                                | Protein Coding | 33 | GC10M015254 | 4.119468212 | <a href="https://www.genecards.org/cgi-bin/carddisp.pl?gene=FAM171A1">https://www.genecards.org/cgi-bin/carddisp.pl?gene=FAM171A1</a>         |
| MYO1C        | Myosin 1C                                                                    | Protein Coding | 44 | GC17M001464 | 4.114840984 | <a href="https://www.genecards.org/cgi-bin/carddisp.pl?gene=MYO1C">https://www.genecards.org/cgi-bin/carddisp.pl?gene=MYO1C</a>               |
| DNAJC15      | DnaJ Heat Shock Protein Family (Hsp40) Member C15                            | Protein Coding | 37 | GC13P043023 | 4.10560894  | <a href="https://www.genecards.org/cgi-bin/carddisp.pl?gene=DNAJC15">https://www.genecards.org/cgi-bin/carddisp.pl?gene=DNAJC15</a>           |
| FAT1         | FAT Atypical Cadherin 1                                                      | Protein Coding | 40 | GC04M186587 | 4.101447105 | <a href="https://www.genecards.org/cgi-bin/carddisp.pl?gene=FAT1">https://www.genecards.org/cgi-bin/carddisp.pl?gene=FAT1</a>                 |
| PHF2         | PHD Finger Protein 2                                                         | Protein Coding | 39 | GC09P093576 | 4.100211143 | <a href="https://www.genecards.org/cgi-bin/carddisp.pl?gene=PHF2">https://www.genecards.org/cgi-bin/carddisp.pl?gene=PHF2</a>                 |
| MACROH2A2    | MacroH2A.2 Histone                                                           | Protein Coding | 30 | GC10P070053 | 4.09620285  | <a href="https://www.genecards.org/cgi-bin/carddisp.pl?gene=MACROH2A2">https://www.genecards.org/cgi-bin/carddisp.pl?gene=MACROH2A2</a>       |
| CHST2        | Carbohydrate Sulfotransferase 2                                              | Protein Coding | 38 | GC03P143119 | 4.075469017 | <a href="https://www.genecards.org/cgi-bin/carddisp.pl?gene=CHST2">https://www.genecards.org/cgi-bin/carddisp.pl?gene=CHST2</a>               |
| RPS8         | Ribosomal Protein S8                                                         | Protein Coding | 40 | GC01P044775 | 4.07418251  | <a href="https://www.genecards.org/cgi-bin/carddisp.pl?gene=RPS8">https://www.genecards.org/cgi-bin/carddisp.pl?gene=RPS8</a>                 |
| RPL23A       | Ribosomal Protein L23a                                                       | Protein Coding | 42 | GC17P028719 | 4.071253777 | <a href="https://www.genecards.org/cgi-bin/carddisp.pl?gene=RPL23A">https://www.genecards.org/cgi-bin/carddisp.pl?gene=RPL23A</a>             |
| ZFP90        | ZFP90 Zinc Finger Protein                                                    | Protein Coding | 36 | GC16P068530 | 4.040327072 | <a href="https://www.genecards.org/cgi-bin/carddisp.pl?gene=ZFP90">https://www.genecards.org/cgi-bin/carddisp.pl?gene=ZFP90</a>               |
| SEC16A       | SEC16 Homolog A, Endoplasmic Reticulum Export Factor                         | Protein Coding | 37 | GC09M136440 | 4.038976669 | <a href="https://www.genecards.org/cgi-bin/carddisp.pl?gene=SEC16A">https://www.genecards.org/cgi-bin/carddisp.pl?gene=SEC16A</a>             |
| MAPK13       | Mitogen-Activated Protein Kinase 13                                          | Protein Coding | 48 | GC06P055340 | 4.032077312 | <a href="https://www.genecards.org/cgi-bin/carddisp.pl?gene=MAPK13">https://www.genecards.org/cgi-bin/carddisp.pl?gene=MAPK13</a>             |
| IL36A        | Interleukin 36 Alpha                                                         | Protein Coding | 37 | GC02P113005 | 4.031521797 | <a href="https://www.genecards.org/cgi-bin/carddisp.pl?gene=IL36A">https://www.genecards.org/cgi-bin/carddisp.pl?gene=IL36A</a>               |
| TCP1         | T-Complex 1                                                                  | Protein Coding | 41 | GC06M159778 | 4.024827957 | <a href="https://www.genecards.org/cgi-bin/carddisp.pl?gene=TCP1">https://www.genecards.org/cgi-bin/carddisp.pl?gene=TCP1</a>                 |
| RGS4         | Regulator Of G Protein Signaling 4                                           | Protein Coding | 44 | GC01P163038 | 4.008200169 | <a href="https://www.genecards.org/cgi-bin/carddisp.pl?gene=RGS4">https://www.genecards.org/cgi-bin/carddisp.pl?gene=RGS4</a>                 |
| RTRAF        | RNA Transcription, Translation And Transport Factor                          | Protein Coding | 29 | GC14P051992 | 4.000492573 | <a href="https://www.genecards.org/cgi-bin/carddisp.pl?gene=RTRAF">https://www.genecards.org/cgi-bin/carddisp.pl?gene=RTRAF</a>               |
| RRBP1        | Ribosome Binding Protein 1                                                   | Protein Coding | 40 | GC20M017613 | 3.978198528 | <a href="https://www.genecards.org/cgi-bin/carddisp.pl?gene=RRBP1">https://www.genecards.org/cgi-bin/carddisp.pl?gene=RRBP1</a>               |
| SRRM1        | Serine And Arginine Repetitive Matrix 1                                      | Protein Coding | 38 | GC01P024631 | 3.965520382 | <a href="https://www.genecards.org/cgi-bin/carddisp.pl?gene=SRRM1">https://www.genecards.org/cgi-bin/carddisp.pl?gene=SRRM1</a>               |
| CCT2         | Chaperonin Containing TCP1 Subunit 2                                         | Protein Coding | 41 | GC12P069585 | 3.961687088 | <a href="https://www.genecards.org/cgi-bin/carddisp.pl?gene=CCT2">https://www.genecards.org/cgi-bin/carddisp.pl?gene=CCT2</a>                 |
| AATF         | Apoptosis Antagonizing Transcription                                         | Protein Coding | 40 | GC17P036948 | 3.959928751 | <a href="https://www.genecards.org/cgi-bin/carddisp.pl?gene=AATF">https://www.genecards.org/cgi-bin/carddisp.pl?gene=AATF</a>                 |
| PIP5K1B      | Phosphatidylinositol-4-Phosphate 5-Kinase Type 1 Beta                        | Protein Coding | 44 | GC09P068705 | 3.938464642 | <a href="https://www.genecards.org/cgi-bin/carddisp.pl?gene=PIP5K1B">https://www.genecards.org/cgi-bin/carddisp.pl?gene=PIP5K1B</a>           |
| USP48        | Ubiquitin Specific Peptidase 48                                              | Protein Coding | 40 | GC01M021678 | 3.935755014 | <a href="https://www.genecards.org/cgi-bin/carddisp.pl?gene=USP48">https://www.genecards.org/cgi-bin/carddisp.pl?gene=USP48</a>               |
| RUVBL2       | RuvB Like AAA ATPase 2                                                       | Protein Coding | 45 | GC19P048993 | 3.933964252 | <a href="https://www.genecards.org/cgi-bin/carddisp.pl?gene=RUVBL2">https://www.genecards.org/cgi-bin/carddisp.pl?gene=RUVBL2</a>             |
| PCSK7        | Proprotein Convertase Subtilisin/Kexin Type 7                                | Protein Coding | 44 | GC11M117199 | 3.930381536 | <a href="https://www.genecards.org/cgi-bin/carddisp.pl?gene=PCSK7">https://www.genecards.org/cgi-bin/carddisp.pl?gene=PCSK7</a>               |
| LOC643339    | Uncharacterized LOC643339                                                    | RNA Gene       | 9  | GC12M093005 | 3.923657656 | <a href="https://www.genecards.org/cgi-bin/carddisp.pl?gene=LOC643339">https://www.genecards.org/cgi-bin/carddisp.pl?gene=LOC643339</a>       |
| OSBPL5       | Oxysterol Binding Protein Like 5                                             | Protein Coding | 40 | GC11M003088 | 3.89450717  | <a href="https://www.genecards.org/cgi-bin/carddisp.pl?gene=OSBPL5">https://www.genecards.org/cgi-bin/carddisp.pl?gene=OSBPL5</a>             |
| CCT3         | Chaperonin Containing TCP1 Subunit 3                                         | Protein Coding | 42 | GC01M156308 | 3.880765438 | <a href="https://www.genecards.org/cgi-bin/carddisp.pl?gene=CCT3">https://www.genecards.org/cgi-bin/carddisp.pl?gene=CCT3</a>                 |
| C1QTNF9      | C1q And TNF Related 9                                                        | Protein Coding | 34 | GC13P024307 | 3.872867584 | <a href="https://www.genecards.org/cgi-bin/carddisp.pl?gene=C1QTNF9">https://www.genecards.org/cgi-bin/carddisp.pl?gene=C1QTNF9</a>           |
| TLCD4        | TLCD Domain Containing 4                                                     | Protein Coding | 27 | GC01P095092 | 3.872813702 | <a href="https://www.genecards.org/cgi-bin/carddisp.pl?gene=TLCD4">https://www.genecards.org/cgi-bin/carddisp.pl?gene=TLCD4</a>               |
| SRSF4        | Serine And Arginine Rich Splicing Factor                                     | Protein Coding | 39 | GC01M029147 | 3.872788668 | <a href="https://www.genecards.org/cgi-bin/carddisp.pl?gene=SRSF4">https://www.genecards.org/cgi-bin/carddisp.pl?gene=SRSF4</a>               |
| GSTK1        | Glutathione S-Transferase Kappa 1                                            | Protein Coding | 42 | GC07P145809 | 3.865218639 | <a href="https://www.genecards.org/cgi-bin/carddisp.pl?gene=GSTK1">https://www.genecards.org/cgi-bin/carddisp.pl?gene=GSTK1</a>               |
| ENHO         | Energy Homeostasis Associated                                                | Protein Coding | 30 | GC09M034516 | 3.846152782 | <a href="https://www.genecards.org/cgi-bin/carddisp.pl?gene=ENHO">https://www.genecards.org/cgi-bin/carddisp.pl?gene=ENHO</a>                 |
| TMC4         | Transmembrane Channel Like 4                                                 | Protein Coding | 35 | GC19M054160 | 3.824649334 | <a href="https://www.genecards.org/cgi-bin/carddisp.pl?gene=TMC4">https://www.genecards.org/cgi-bin/carddisp.pl?gene=TMC4</a>                 |
| TMBIM6       | Transmembrane BAX Inhibitor Motif Containing 6                               | Protein Coding | 37 | GC12P049707 | 3.821199417 | <a href="https://www.genecards.org/cgi-bin/carddisp.pl?gene=TMBIM6">https://www.genecards.org/cgi-bin/carddisp.pl?gene=TMBIM6</a>             |
| RBM14        | RNA Binding Motif Protein 14                                                 | Protein Coding | 37 | GC11P066785 | 3.819814205 | <a href="https://www.genecards.org/cgi-bin/carddisp.pl?gene=RBM14">https://www.genecards.org/cgi-bin/carddisp.pl?gene=RBM14</a>               |
| KIF16B       | Kinesin Family Member 16B                                                    | Protein Coding | 38 | GC20M016272 | 3.819159985 | <a href="https://www.genecards.org/cgi-bin/carddisp.pl?gene=KIF16B">https://www.genecards.org/cgi-bin/carddisp.pl?gene=KIF16B</a>             |
| SVIL-AS1     | SVIL Antisense RNA 1                                                         | RNA Gene       | 13 | GC10P029410 | 3.811452866 | <a href="https://www.genecards.org/cgi-bin/carddisp.pl?gene=SVIL-AS1">https://www.genecards.org/cgi-bin/carddisp.pl?gene=SVIL-AS1</a>         |
| RAB37        | RAB37, Member RAS Oncogene Family                                            | Protein Coding | 39 | GC17P074671 | 3.804848433 | <a href="https://www.genecards.org/cgi-bin/carddisp.pl?gene=RAB37">https://www.genecards.org/cgi-bin/carddisp.pl?gene=RAB37</a>               |
| NDUFA4L2     | NDUFA4 Mitochondrial Complex Associated Like 2                               | Protein Coding | 37 | GC12M057234 | 3.802900076 | <a href="https://www.genecards.org/cgi-bin/carddisp.pl?gene=NDUFA4L2">https://www.genecards.org/cgi-bin/carddisp.pl?gene=NDUFA4L2</a>         |
| DDX17        | DEAD-Box Helicase 17                                                         | Protein Coding | 41 | GC22M038483 | 3.797605515 | <a href="https://www.genecards.org/cgi-bin/carddisp.pl?gene=DDX17">https://www.genecards.org/cgi-bin/carddisp.pl?gene=DDX17</a>               |
| RND3         | Rho Family GTPase 3                                                          | Protein Coding | 43 | GC02M150468 | 3.790923595 | <a href="https://www.genecards.org/cgi-bin/carddisp.pl?gene=RND3">https://www.genecards.org/cgi-bin/carddisp.pl?gene=RND3</a>                 |
| TMOD3        | Tropomodulin 3                                                               | Protein Coding | 40 | GC15P051829 | 3.783874989 | <a href="https://www.genecards.org/cgi-bin/carddisp.pl?gene=TMOD3">https://www.genecards.org/cgi-bin/carddisp.pl?gene=TMOD3</a>               |

|                 |                                                                                |                |    |              |             |                                                                                                                                                     |
|-----------------|--------------------------------------------------------------------------------|----------------|----|--------------|-------------|-----------------------------------------------------------------------------------------------------------------------------------------------------|
| CARD6           | Caspase Recruitment Domain Family Member 6                                     | Protein Coding | 38 | GC05P040841  | 3.781528711 | <a href="https://www.genecards.org/cgi-bin/carddisp.pl?gene=CARD6">https://www.genecards.org/cgi-bin/carddisp.pl?gene=CARD6</a>                     |
| GSDMD           | Gsdmderin D                                                                    | Protein Coding | 40 | GC08P143553  | 3.768371582 | <a href="https://www.genecards.org/cgi-bin/carddisp.pl?gene=GSDMD">https://www.genecards.org/cgi-bin/carddisp.pl?gene=GSDMD</a>                     |
| XPO4            | Exportin 4                                                                     | Protein Coding | 38 | GC13M020777  | 3.76751852  | <a href="https://www.genecards.org/cgi-bin/carddisp.pl?gene=XPO4">https://www.genecards.org/cgi-bin/carddisp.pl?gene=XPO4</a>                       |
| UBE2D3          | Ubiquitin Conjugating Enzyme E2 D3                                             | Protein Coding | 47 | GC04M102794  | 3.764195442 | <a href="https://www.genecards.org/cgi-bin/carddisp.pl?gene=UBE2D3">https://www.genecards.org/cgi-bin/carddisp.pl?gene=UBE2D3</a>                   |
| SF3B3           | Splicing Factor 3b Subunit 3                                                   | Protein Coding | 40 | GC16P070523  | 3.760380745 | <a href="https://www.genecards.org/cgi-bin/carddisp.pl?gene=SF3B3">https://www.genecards.org/cgi-bin/carddisp.pl?gene=SF3B3</a>                     |
| PDE7B           | Phosphodiesterase 7B                                                           | Protein Coding | 39 | GC06P135795  | 3.755542755 | <a href="https://www.genecards.org/cgi-bin/carddisp.pl?gene=PDE7B">https://www.genecards.org/cgi-bin/carddisp.pl?gene=PDE7B</a>                     |
| RNU6-53P        | RNA, U6 Small Nuclear 53, Pseudogene                                           | Pseudogene     | 8  | GC13M028703  | 3.752223015 | <a href="https://www.genecards.org/cgi-bin/carddisp.pl?gene=RNU6-53P">https://www.genecards.org/cgi-bin/carddisp.pl?gene=RNU6-53P</a>               |
| FOXN3           | Forkhead Box N3                                                                | Protein Coding | 39 | GC14M095787  | 3.749269485 | <a href="https://www.genecards.org/cgi-bin/carddisp.pl?gene=FOXN3">https://www.genecards.org/cgi-bin/carddisp.pl?gene=FOXN3</a>                     |
| CIDEA           | Cell Death Inducing DFFA Like Effector A                                       | Protein Coding | 41 | GC18P012254  | 3.748991013 | <a href="https://www.genecards.org/cgi-bin/carddisp.pl?gene=CIDEA">https://www.genecards.org/cgi-bin/carddisp.pl?gene=CIDEA</a>                     |
| IBTK            | Inhibitor Of Bruton Tyrosine Kinase                                            | Protein Coding | 40 | GC06M082169  | 3.722085476 | <a href="https://www.genecards.org/cgi-bin/carddisp.pl?gene=IBTK">https://www.genecards.org/cgi-bin/carddisp.pl?gene=IBTK</a>                       |
| EIF3L           | Eukaryotic Translation Initiation Factor 3 Subunit L                           | Protein Coding | 39 | GC22P037848  | 3.714426041 | <a href="https://www.genecards.org/cgi-bin/carddisp.pl?gene=EIF3L">https://www.genecards.org/cgi-bin/carddisp.pl?gene=EIF3L</a>                     |
| TRMT44          | TRNA Methyltransferase 44 Homolog                                              | Protein Coding | 32 | GC04P008439  | 3.696261883 | <a href="https://www.genecards.org/cgi-bin/carddisp.pl?gene=TRMT44">https://www.genecards.org/cgi-bin/carddisp.pl?gene=TRMT44</a>                   |
| SLC9A4          | Solute Carrier Family 9 Member A4                                              | Protein Coding | 36 | GC02P102456  | 3.694443941 | <a href="https://www.genecards.org/cgi-bin/carddisp.pl?gene=SLC9A4">https://www.genecards.org/cgi-bin/carddisp.pl?gene=SLC9A4</a>                   |
| RLN2            | Relaxin 2                                                                      | Protein Coding | 37 | GC09M005306  | 3.670796394 | <a href="https://www.genecards.org/cgi-bin/carddisp.pl?gene=RLN2">https://www.genecards.org/cgi-bin/carddisp.pl?gene=RLN2</a>                       |
| NLRP2           | NLR Family Pyrin Domain Containing 2                                           | Protein Coding | 42 | GC19P054953  | 3.669286251 | <a href="https://www.genecards.org/cgi-bin/carddisp.pl?gene=NLRP2">https://www.genecards.org/cgi-bin/carddisp.pl?gene=NLRP2</a>                     |
| PLPP7           | Phospholipid Phosphatase 7 (Inactive)                                          | Protein Coding | 28 | GC09P131290  | 3.65639019  | <a href="https://www.genecards.org/cgi-bin/carddisp.pl?gene=PLPP7">https://www.genecards.org/cgi-bin/carddisp.pl?gene=PLPP7</a>                     |
| WSPAR           | WNT Signaling Pathway Activating Non-Coding RNA                                | RNA Gene       | 11 | GC05P133914  | 3.637709856 | <a href="https://www.genecards.org/cgi-bin/carddisp.pl?gene=WSPAR">https://www.genecards.org/cgi-bin/carddisp.pl?gene=WSPAR</a>                     |
| USP4            | Ubiquitin Specific Peptidase 4                                                 | Protein Coding | 43 | GC03M049277  | 3.622792959 | <a href="https://www.genecards.org/cgi-bin/carddisp.pl?gene=USP4">https://www.genecards.org/cgi-bin/carddisp.pl?gene=USP4</a>                       |
| CIQTNF3         | CIq And TNF Related 3                                                          | Protein Coding | 38 | GC02M034017  | 3.622492552 | <a href="https://www.genecards.org/cgi-bin/carddisp.pl?gene=CIQTNF3">https://www.genecards.org/cgi-bin/carddisp.pl?gene=CIQTNF3</a>                 |
| UBXN1           | UBX Domain Protein 1                                                           | Protein Coding | 36 | GC11M069259  | 3.616335869 | <a href="https://www.genecards.org/cgi-bin/carddisp.pl?gene=UBXN1">https://www.genecards.org/cgi-bin/carddisp.pl?gene=UBXN1</a>                     |
| LINC00917       | Long Intergenic Non-Protein Coding RNA 917                                     | RNA Gene       | 15 | GC16M086366  | 3.609225273 | <a href="https://www.genecards.org/cgi-bin/carddisp.pl?gene=LINC00917">https://www.genecards.org/cgi-bin/carddisp.pl?gene=LINC00917</a>             |
| ADAMTS9-AS2     | ADAMTS9 Antisense RNA 2                                                        | RNA Gene       | 16 | GC03P064671  | 3.607175827 | <a href="https://www.genecards.org/cgi-bin/carddisp.pl?gene=ADAMTS9-AS2">https://www.genecards.org/cgi-bin/carddisp.pl?gene=ADAMTS9-AS2</a>         |
| CIDEB           | Cell Death Inducing DFFA Like Effector B                                       | Protein Coding | 37 | GC14M024305  | 3.60635519  | <a href="https://www.genecards.org/cgi-bin/carddisp.pl?gene=CIDEB">https://www.genecards.org/cgi-bin/carddisp.pl?gene=CIDEB</a>                     |
| EIF3E           | Eukaryotic Translation Initiation Factor 3 Subunit E                           | Protein Coding | 39 | GC08M108163  | 3.590932846 | <a href="https://www.genecards.org/cgi-bin/carddisp.pl?gene=EIF3E">https://www.genecards.org/cgi-bin/carddisp.pl?gene=EIF3E</a>                     |
| ARPC2           | Actin Related Protein 2/3 Complex                                              | Protein Coding | 43 | GC02P218217  | 3.587478876 | <a href="https://www.genecards.org/cgi-bin/carddisp.pl?gene=ARPC2">https://www.genecards.org/cgi-bin/carddisp.pl?gene=ARPC2</a>                     |
| KRTAP5-5        | Keratin Associated Protein 5-5                                                 | Protein Coding | 26 | GC11P001629  | 3.583631992 | <a href="https://www.genecards.org/cgi-bin/carddisp.pl?gene=KRTAP5-5">https://www.genecards.org/cgi-bin/carddisp.pl?gene=KRTAP5-5</a>               |
| KLHL6           | Kelch Like Family Member 6                                                     | Protein Coding | 36 | GC03M183487  | 3.572049141 | <a href="https://www.genecards.org/cgi-bin/carddisp.pl?gene=KLHL6">https://www.genecards.org/cgi-bin/carddisp.pl?gene=KLHL6</a>                     |
| HSD17B11        | Hydroxysteroid 17-Beta Dehydrogenase 11                                        | Protein Coding | 41 | GC04M087336  | 3.558064461 | <a href="https://www.genecards.org/cgi-bin/carddisp.pl?gene=HSD17B11">https://www.genecards.org/cgi-bin/carddisp.pl?gene=HSD17B11</a>               |
| SLC26A6         | Solute Carrier Family 26 Member 6                                              | Protein Coding | 39 | GC03M048625  | 3.55651474  | <a href="https://www.genecards.org/cgi-bin/carddisp.pl?gene=SLC26A6">https://www.genecards.org/cgi-bin/carddisp.pl?gene=SLC26A6</a>                 |
| COX7B2          | Cytochrome C Oxidase Subunit 7B2                                               | Protein Coding | 32 | GC04M046734  | 3.554057598 | <a href="https://www.genecards.org/cgi-bin/carddisp.pl?gene=COX7B2">https://www.genecards.org/cgi-bin/carddisp.pl?gene=COX7B2</a>                   |
| VSIG4           | V-Set And Immunoglobulin Domain Containing 4                                   | Protein Coding | 37 | GC0XM066021  | 3.552012444 | <a href="https://www.genecards.org/cgi-bin/carddisp.pl?gene=VSIG4">https://www.genecards.org/cgi-bin/carddisp.pl?gene=VSIG4</a>                     |
| SNHG18          | Small Nucleolar RNA Host Gene 18                                               | RNA Gene       | 15 | GC05P009562  | 3.546533346 | <a href="https://www.genecards.org/cgi-bin/carddisp.pl?gene=SNHG18">https://www.genecards.org/cgi-bin/carddisp.pl?gene=SNHG18</a>                   |
| ILF2            | Interleukin Enhancer Binding Factor 2                                          | Protein Coding | 40 | GC01M153661  | 3.53593874  | <a href="https://www.genecards.org/cgi-bin/carddisp.pl?gene=ILF2">https://www.genecards.org/cgi-bin/carddisp.pl?gene=ILF2</a>                       |
| HIGD1A          | HIG1 Hypoxia Inducible Domain Family Member 1A                                 | Protein Coding | 38 | GC03M042782  | 3.535363674 | <a href="https://www.genecards.org/cgi-bin/carddisp.pl?gene=HIGD1A">https://www.genecards.org/cgi-bin/carddisp.pl?gene=HIGD1A</a>                   |
| MYBBP1A         | MYB Binding Protein 1a                                                         | Protein Coding | 40 | GC17M004538  | 3.525005579 | <a href="https://www.genecards.org/cgi-bin/carddisp.pl?gene=MYBBP1A">https://www.genecards.org/cgi-bin/carddisp.pl?gene=MYBBP1A</a>                 |
| PWWP3A          | PWWP Domain Containing 3A, DNA Repair Factor                                   | Protein Coding | 21 | GC19P001625  | 3.518794775 | <a href="https://www.genecards.org/cgi-bin/carddisp.pl?gene=PWWP3A">https://www.genecards.org/cgi-bin/carddisp.pl?gene=PWWP3A</a>                   |
| GGT3P           | Gamma-Glutamyltransferase 3 Pseudogene                                         | Pseudogene     | 18 | GC22M018773  | 3.518324614 | <a href="https://www.genecards.org/cgi-bin/carddisp.pl?gene=GGT3P">https://www.genecards.org/cgi-bin/carddisp.pl?gene=GGT3P</a>                     |
| ANKK1           | Ankyrin Repeat And Kinase Domain Containing 1                                  | Protein Coding | 38 | GC11P113387  | 3.5160923   | <a href="https://www.genecards.org/cgi-bin/carddisp.pl?gene=ANKK1">https://www.genecards.org/cgi-bin/carddisp.pl?gene=ANKK1</a>                     |
| MAU2            | MAU2 Sister Chromatid Cohesion Factor                                          | Protein Coding | 33 | GC19P019320  | 3.510564804 | <a href="https://www.genecards.org/cgi-bin/carddisp.pl?gene=MAU2">https://www.genecards.org/cgi-bin/carddisp.pl?gene=MAU2</a>                       |
| LOC101929710    | Uncharacterized LOC101929710                                                   | RNA Gene       | 11 | GC05P095962  | 3.50092864  | <a href="https://www.genecards.org/cgi-bin/carddisp.pl?gene=LOC101929710">https://www.genecards.org/cgi-bin/carddisp.pl?gene=LOC101929710</a>       |
| ZBTB7A          | Zinc Finger And BTB Domain Containing                                          | Protein Coding | 37 | GC19M004045  | 3.495354891 | <a href="https://www.genecards.org/cgi-bin/carddisp.pl?gene=ZBTB7A">https://www.genecards.org/cgi-bin/carddisp.pl?gene=ZBTB7A</a>                   |
| MIR1183         | MicroRNA 1183                                                                  | RNA Gene       | 15 | GC07P021510  | 3.488068104 | <a href="https://www.genecards.org/cgi-bin/carddisp.pl?gene=MIR1183">https://www.genecards.org/cgi-bin/carddisp.pl?gene=MIR1183</a>                 |
| CDH26           | Cadherin 26                                                                    | Protein Coding | 36 | GC02P059958  | 3.485193253 | <a href="https://www.genecards.org/cgi-bin/carddisp.pl?gene=CDH26">https://www.genecards.org/cgi-bin/carddisp.pl?gene=CDH26</a>                     |
| AGR3            | Anterior Gradient 3, Protein Disulphide Isomerase Family Member                | Protein Coding | 38 | GC07M016854  | 3.473514557 | <a href="https://www.genecards.org/cgi-bin/carddisp.pl?gene=AGR3">https://www.genecards.org/cgi-bin/carddisp.pl?gene=AGR3</a>                       |
| COL21A1         | Collagen Type XXI Alpha 1 Chain                                                | Protein Coding | 37 | GC06M056057  | 3.468084812 | <a href="https://www.genecards.org/cgi-bin/carddisp.pl?gene=COL21A1">https://www.genecards.org/cgi-bin/carddisp.pl?gene=COL21A1</a>                 |
| SMOC2           | SPARC Related Modular Calcium Binding                                          | Protein Coding | 42 | GC06P168441  | 3.46173811  | <a href="https://www.genecards.org/cgi-bin/carddisp.pl?gene=SMOC2">https://www.genecards.org/cgi-bin/carddisp.pl?gene=SMOC2</a>                     |
| PABPC4          | Poly(A) Binding Protein Cytoplasmic 4                                          | Protein Coding | 42 | GC01M039560  | 3.453729153 | <a href="https://www.genecards.org/cgi-bin/carddisp.pl?gene=PABPC4">https://www.genecards.org/cgi-bin/carddisp.pl?gene=PABPC4</a>                   |
| LRRFIP2         | LRR Binding FLII Interacting Protein 2                                         | Protein Coding | 38 | GC03M037052  | 3.445348263 | <a href="https://www.genecards.org/cgi-bin/carddisp.pl?gene=LRRFIP2">https://www.genecards.org/cgi-bin/carddisp.pl?gene=LRRFIP2</a>                 |
| CNOT4           | CCR4-NOT Transcription Complex Subunit 4                                       | Protein Coding | 41 | GC07M135361  | 3.438128233 | <a href="https://www.genecards.org/cgi-bin/carddisp.pl?gene=CNOT4">https://www.genecards.org/cgi-bin/carddisp.pl?gene=CNOT4</a>                     |
| CKAP4           | Cytoskeleton Associated Protein 4                                              | Protein Coding | 38 | GC12M106237  | 3.431976795 | <a href="https://www.genecards.org/cgi-bin/carddisp.pl?gene=CKAP4">https://www.genecards.org/cgi-bin/carddisp.pl?gene=CKAP4</a>                     |
| SUB1            | SUB1 Regulator Of Transcription                                                | Protein Coding | 39 | GC05P032540  | 3.412381172 | <a href="https://www.genecards.org/cgi-bin/carddisp.pl?gene=SUB1">https://www.genecards.org/cgi-bin/carddisp.pl?gene=SUB1</a>                       |
| BECN2           | Becclin 2                                                                      | Protein Coding | 23 | GC01P241957  | 3.368844032 | <a href="https://www.genecards.org/cgi-bin/carddisp.pl?gene=BECN2">https://www.genecards.org/cgi-bin/carddisp.pl?gene=BECN2</a>                     |
| COX6B2          | Cytochrome C Oxidase Subunit 6B2                                               | Protein Coding | 32 | GC19M055350  | 3.349303246 | <a href="https://www.genecards.org/cgi-bin/carddisp.pl?gene=COX6B2">https://www.genecards.org/cgi-bin/carddisp.pl?gene=COX6B2</a>                   |
| USP10           | Ubiquitin Specific Peptidase 10                                                | Protein Coding | 44 | GC16P084734  | 3.347266674 | <a href="https://www.genecards.org/cgi-bin/carddisp.pl?gene=USP10">https://www.genecards.org/cgi-bin/carddisp.pl?gene=USP10</a>                     |
| LATS2           | Large Tumor Suppressor Kinase 2                                                | Protein Coding | 46 | GC13M020973  | 3.345319748 | <a href="https://www.genecards.org/cgi-bin/carddisp.pl?gene=LATS2">https://www.genecards.org/cgi-bin/carddisp.pl?gene=LATS2</a>                     |
| HSALNG0013825   |                                                                                | RNA Gene       | 1  | GC02P027507  | 3.336766005 | <a href="https://www.genecards.org/cgi-bin/carddisp.pl?gene=HSALNG0013825">https://www.genecards.org/cgi-bin/carddisp.pl?gene=HSALNG0013825</a>     |
| ACTR5           | Actin Related Protein 5                                                        | Protein Coding | 35 | GC20P038748  | 3.329617023 | <a href="https://www.genecards.org/cgi-bin/carddisp.pl?gene=ACTR5">https://www.genecards.org/cgi-bin/carddisp.pl?gene=ACTR5</a>                     |
| CCDC63          | Coiled-Coil Domain Containing 63                                               | Protein Coding | 34 | GC12P110846  | 3.328995228 | <a href="https://www.genecards.org/cgi-bin/carddisp.pl?gene=CCDC63">https://www.genecards.org/cgi-bin/carddisp.pl?gene=CCDC63</a>                   |
| FAM3B           | FAM3 Metabolism Regulating Signaling Molecule B                                | Protein Coding | 39 | GC21P041304  | 3.328571796 | <a href="https://www.genecards.org/cgi-bin/carddisp.pl?gene=FAM3B">https://www.genecards.org/cgi-bin/carddisp.pl?gene=FAM3B</a>                     |
| DDX60           | DDX/H-Box Helicase 60                                                          | Protein Coding | 35 | GC04M168216  | 3.312973022 | <a href="https://www.genecards.org/cgi-bin/carddisp.pl?gene=DDX60">https://www.genecards.org/cgi-bin/carddisp.pl?gene=DDX60</a>                     |
| TSNAX-DJSC1     | TSNAX-DJSC1 Readthrough (NMD Candidate)                                        | RNA Gene       | 19 | GC01P231528  | 3.306806564 | <a href="https://www.genecards.org/cgi-bin/carddisp.pl?gene=TSNAX-DJSC1">https://www.genecards.org/cgi-bin/carddisp.pl?gene=TSNAX-DJSC1</a>         |
| SRRM2           | Serine/Arginine Repetitive Matrix 2                                            | Protein Coding | 34 | GC16P005607  | 3.298483372 | <a href="https://www.genecards.org/cgi-bin/carddisp.pl?gene=SRRM2">https://www.genecards.org/cgi-bin/carddisp.pl?gene=SRRM2</a>                     |
| GGT5            | Gamma-Glutamyltransferase 5                                                    | Protein Coding | 40 | GC22M024219  | 3.290547848 | <a href="https://www.genecards.org/cgi-bin/carddisp.pl?gene=GGT5">https://www.genecards.org/cgi-bin/carddisp.pl?gene=GGT5</a>                       |
| LINC01405       | Long Intergenic Non-Protein Coding RNA 1405                                    | RNA Gene       | 15 | GC12P110936  | 3.284021854 | <a href="https://www.genecards.org/cgi-bin/carddisp.pl?gene=LINC01405">https://www.genecards.org/cgi-bin/carddisp.pl?gene=LINC01405</a>             |
| LINC01016       | Long Intergenic Non-Protein Coding RNA 1016                                    | RNA Gene       | 13 | GC06M047659  | 3.284021854 | <a href="https://www.genecards.org/cgi-bin/carddisp.pl?gene=LINC01016">https://www.genecards.org/cgi-bin/carddisp.pl?gene=LINC01016</a>             |
| SH3BP5          | SH3 Domain Binding Protein 5                                                   | Protein Coding | 41 | GC03M016936  | 3.279747486 | <a href="https://www.genecards.org/cgi-bin/carddisp.pl?gene=SH3BP5">https://www.genecards.org/cgi-bin/carddisp.pl?gene=SH3BP5</a>                   |
| MYL6B           | Myosin Light Chain 6B                                                          | Protein Coding | 40 | GC12P1056388 | 3.252141237 | <a href="https://www.genecards.org/cgi-bin/carddisp.pl?gene=MYL6B">https://www.genecards.org/cgi-bin/carddisp.pl?gene=MYL6B</a>                     |
| ZNF101          | Zinc Finger Protein 101                                                        | Protein Coding | 34 | GC19P026665  | 3.250607252 | <a href="https://www.genecards.org/cgi-bin/carddisp.pl?gene=ZNF101">https://www.genecards.org/cgi-bin/carddisp.pl?gene=ZNF101</a>                   |
| RESF1           | Retroelement Silencing Factor 1                                                | Protein Coding | 25 | GC12P032003  | 3.248668194 | <a href="https://www.genecards.org/cgi-bin/carddisp.pl?gene=RESF1">https://www.genecards.org/cgi-bin/carddisp.pl?gene=RESF1</a>                     |
| STRA8           | Stimulated By Retinoic Acid 8                                                  | Protein Coding | 36 | GC07P135231  | 3.248404503 | <a href="https://www.genecards.org/cgi-bin/carddisp.pl?gene=STRA8">https://www.genecards.org/cgi-bin/carddisp.pl?gene=STRA8</a>                     |
| FAM3A           | FAM3 Metabolism Regulating Signaling Molecule A                                | Protein Coding | 37 | GC0XM154506  | 3.223508358 | <a href="https://www.genecards.org/cgi-bin/carddisp.pl?gene=FAM3A">https://www.genecards.org/cgi-bin/carddisp.pl?gene=FAM3A</a>                     |
| MLXIP           | MLX Interacting Protein                                                        | Protein Coding | 33 | GC12P122078  | 3.219124794 | <a href="https://www.genecards.org/cgi-bin/carddisp.pl?gene=MLXIP">https://www.genecards.org/cgi-bin/carddisp.pl?gene=MLXIP</a>                     |
| DEFA1           | Defensin Alpha 1                                                               | Protein Coding | 41 | GC08M006977  | 3.217813015 | <a href="https://www.genecards.org/cgi-bin/carddisp.pl?gene=DEFA1">https://www.genecards.org/cgi-bin/carddisp.pl?gene=DEFA1</a>                     |
| DDX46           | DEAD-Box Helicase 46                                                           | Protein Coding | 40 | GC05P134758  | 3.211338997 | <a href="https://www.genecards.org/cgi-bin/carddisp.pl?gene=DDX46">https://www.genecards.org/cgi-bin/carddisp.pl?gene=DDX46</a>                     |
| KDM4B           | Lysine Demethylase 4B                                                          | Protein Coding | 44 | GC19P004969  | 3.19203496  | <a href="https://www.genecards.org/cgi-bin/carddisp.pl?gene=KDM4B">https://www.genecards.org/cgi-bin/carddisp.pl?gene=KDM4B</a>                     |
| UQCRLH          | Ubiquinol-Cytochrome C Reductase Hinge Protein Like                            | Protein Coding | 23 | GC01M15808   | 3.182341337 | <a href="https://www.genecards.org/cgi-bin/carddisp.pl?gene=UQCRLH">https://www.genecards.org/cgi-bin/carddisp.pl?gene=UQCRLH</a>                   |
| MIR646HG        | MIR646 Host Gene                                                               | RNA Gene       | 15 | GC20P060088  | 3.172647953 | <a href="https://www.genecards.org/cgi-bin/carddisp.pl?gene=MIR646HG">https://www.genecards.org/cgi-bin/carddisp.pl?gene=MIR646HG</a>               |
| EIF4A2          | Eukaryotic Translation Initiation Factor ADP Ribosylation Factor Like GTPase 2 | Protein Coding | 45 | GC03P186783  | 3.160809994 | <a href="https://www.genecards.org/cgi-bin/carddisp.pl?gene=EIF4A2">https://www.genecards.org/cgi-bin/carddisp.pl?gene=EIF4A2</a>                   |
| ARL2BPP6        | Binding Protein Pseudogene 6                                                   | Pseudogene     | 6  | GC05P175290  | 3.157893658 | <a href="https://www.genecards.org/cgi-bin/carddisp.pl?gene=ARL2BPP6">https://www.genecards.org/cgi-bin/carddisp.pl?gene=ARL2BPP6</a>               |
| ZNF267          | Zinc Finger Protein 267                                                        | Protein Coding | 36 | GC16P032629  | 3.153172493 | <a href="https://www.genecards.org/cgi-bin/carddisp.pl?gene=ZNF267">https://www.genecards.org/cgi-bin/carddisp.pl?gene=ZNF267</a>                   |
| ENSG00000231487 |                                                                                | RNA Gene       | 6  | GC11M001683  | 3.115470886 | <a href="https://www.genecards.org/cgi-bin/carddisp.pl?gene=ENSG00000231487">https://www.genecards.org/cgi-bin/carddisp.pl?gene=ENSG00000231487</a> |
| C16orf95        | Chromosome 16 Open Reading Frame 95                                            | Protein Coding | 26 | GC16M087119  | 3.112183571 | <a href="https://www.genecards.org/cgi-bin/carddisp.pl?gene=C16orf95">https://www.genecards.org/cgi-bin/carddisp.pl?gene=C16orf95</a>               |
| Inc-TM6SF2-1    |                                                                                | RNA Gene       | 4  | GC19M019270  | 3.110280991 | <a href="https://www.genecards.org/cgi-bin/carddisp.pl?gene=Inc-TM6SF2-1">https://www.genecards.org/cgi-bin/carddisp.pl?gene=Inc-TM6SF2-1</a>       |
| ENSG00000267629 |                                                                                | RNA Gene       | 3  | GC19M019254  | 3.110280991 | <a href="https://www.genecards.org/cgi-bin/carddisp.pl?gene=ENSG00000267629">https://www.genecards.org/cgi-bin/carddisp.pl?gene=ENSG00000267629</a> |



|                 |                                                                  |                |    |             |             |                                                                                                                                                     |
|-----------------|------------------------------------------------------------------|----------------|----|-------------|-------------|-----------------------------------------------------------------------------------------------------------------------------------------------------|
| MIR6090         | MicroRNA 6090                                                    | RNA Gene       | 10 | GC11P128522 | 3.100980997 | <a href="https://www.genecards.org/cgi-bin/carddisp.pl?gene=MIR6090">https://www.genecards.org/cgi-bin/carddisp.pl?gene=MIR6090</a>                 |
| IL36B           | Interleukin 36 Beta                                              | Protein Coding | 35 | GC02M113022 | 3.09431529  | <a href="https://www.genecards.org/cgi-bin/carddisp.pl?gene=IL36B">https://www.genecards.org/cgi-bin/carddisp.pl?gene=IL36B</a>                     |
| ETS1-AS1        | ETS1 Antisense RNA 1                                             | RNA Gene       | 11 | GC11P128527 | 3.086783648 | <a href="https://www.genecards.org/cgi-bin/carddisp.pl?gene=ETS1-AS1">https://www.genecards.org/cgi-bin/carddisp.pl?gene=ETS1-AS1</a>               |
| ARHGAP8         | Rho GTPase Activating Protein 8                                  | Protein Coding | 34 | GC22P044752 | 3.085615635 | <a href="https://www.genecards.org/cgi-bin/carddisp.pl?gene=ARHGAP8">https://www.genecards.org/cgi-bin/carddisp.pl?gene=ARHGAP8</a>                 |
| RSPO3           | R-Spondin 3                                                      | Protein Coding | 38 | GC06P127118 | 3.079731464 | <a href="https://www.genecards.org/cgi-bin/carddisp.pl?gene=RSPO3">https://www.genecards.org/cgi-bin/carddisp.pl?gene=RSPO3</a>                     |
| A2MP1           | Alpha-2-Macroglobulin Pseudogene 1                               | Pseudogene     | 13 | GC12M009228 | 3.064694881 | <a href="https://www.genecards.org/cgi-bin/carddisp.pl?gene=A2MP1">https://www.genecards.org/cgi-bin/carddisp.pl?gene=A2MP1</a>                     |
| GLT8D2          | Glycosyltransferase 8 Domain Containing                          | Protein Coding | 36 | GC12M103988 | 3.059843779 | <a href="https://www.genecards.org/cgi-bin/carddisp.pl?gene=GLT8D2">https://www.genecards.org/cgi-bin/carddisp.pl?gene=GLT8D2</a>                   |
| RAB32           | RAB32, Member RAS Oncogene Family                                | Protein Coding | 39 | GC06P146543 | 3.033777237 | <a href="https://www.genecards.org/cgi-bin/carddisp.pl?gene=RAB32">https://www.genecards.org/cgi-bin/carddisp.pl?gene=RAB32</a>                     |
| HIF3A           | Hypoxia Inducible Factor 3 Subunit Alpha                         | Protein Coding | 40 | GC19P046297 | 3.029106379 | <a href="https://www.genecards.org/cgi-bin/carddisp.pl?gene=HIF3A">https://www.genecards.org/cgi-bin/carddisp.pl?gene=HIF3A</a>                     |
| TMEM97          | Transmembrane Protein 97                                         | Protein Coding | 36 | GC17P028319 | 3.014130592 | <a href="https://www.genecards.org/cgi-bin/carddisp.pl?gene=TMEM97">https://www.genecards.org/cgi-bin/carddisp.pl?gene=TMEM97</a>                   |
| TRPC4AP         | Transient Receptor Potential Cation Channel Subfamily C Member 4 | Protein Coding | 37 | GC20M035002 | 3.013672829 | <a href="https://www.genecards.org/cgi-bin/carddisp.pl?gene=TRPC4AP">https://www.genecards.org/cgi-bin/carddisp.pl?gene=TRPC4AP</a>                 |
| LINC02694       | Long Intergenic Non-Protein Coding RNA 2694                      | RNA Gene       | 23 | GC15P038622 | 3.004884243 | <a href="https://www.genecards.org/cgi-bin/carddisp.pl?gene=LINC02694">https://www.genecards.org/cgi-bin/carddisp.pl?gene=LINC02694</a>             |
| SMIM20          | Small Integral Membrane Protein 20                               | Protein Coding | 29 | GC04P025865 | 3.002661467 | <a href="https://www.genecards.org/cgi-bin/carddisp.pl?gene=SMIM20">https://www.genecards.org/cgi-bin/carddisp.pl?gene=SMIM20</a>                   |
| RNU6-961P       | RNA, U6 Small Nuclear 961, Pseudogene                            | Pseudogene     | 8  | GC02P020175 | 2.9941535   | <a href="https://www.genecards.org/cgi-bin/carddisp.pl?gene=RNU6-961P">https://www.genecards.org/cgi-bin/carddisp.pl?gene=RNU6-961P</a>             |
| DHX15           | DEAH-Box Helicase 15                                             | Protein Coding | 38 | GC04M024519 | 2.965582848 | <a href="https://www.genecards.org/cgi-bin/carddisp.pl?gene=DHX15">https://www.genecards.org/cgi-bin/carddisp.pl?gene=DHX15</a>                     |
| LINC01354       | Long Intergenic Non-Protein Coding RNA 1354                      | RNA Gene       | 12 | GC01M234528 | 2.957972765 | <a href="https://www.genecards.org/cgi-bin/carddisp.pl?gene=LINC01354">https://www.genecards.org/cgi-bin/carddisp.pl?gene=LINC01354</a>             |
| RUBCNL          | Rubicon Like Autophagy Enhancer                                  | Protein Coding | 26 | GC13M046343 | 2.950154305 | <a href="https://www.genecards.org/cgi-bin/carddisp.pl?gene=RUBCNL">https://www.genecards.org/cgi-bin/carddisp.pl?gene=RUBCNL</a>                   |
| GBX2            | Gastrulation Brain Homeobox 2                                    | Protein Coding | 40 | GC02M236165 | 2.949873447 | <a href="https://www.genecards.org/cgi-bin/carddisp.pl?gene=GBX2">https://www.genecards.org/cgi-bin/carddisp.pl?gene=GBX2</a>                       |
| ENSG00000253111 |                                                                  | RNA Gene       | 7  | GC08P125466 | 2.923579693 | <a href="https://www.genecards.org/cgi-bin/carddisp.pl?gene=ENSG00000253111">https://www.genecards.org/cgi-bin/carddisp.pl?gene=ENSG00000253111</a> |
| SDF2L1          | Stromal Cell Derived Factor 2 Like 1                             | Protein Coding | 35 | GC22P026487 | 2.91104269  | <a href="https://www.genecards.org/cgi-bin/carddisp.pl?gene=SDF2L1">https://www.genecards.org/cgi-bin/carddisp.pl?gene=SDF2L1</a>                   |
| EBNA1BP2        | EBNA1 Binding Protein 2                                          | Protein Coding | 38 | GC01M043165 | 2.898739815 | <a href="https://www.genecards.org/cgi-bin/carddisp.pl?gene=EBNA1BP2">https://www.genecards.org/cgi-bin/carddisp.pl?gene=EBNA1BP2</a>               |
| HSALNG0013412   |                                                                  | RNA Gene       | 4  | GC02P020202 | 2.88000536  | <a href="https://www.genecards.org/cgi-bin/carddisp.pl?gene=HSALNG0013412">https://www.genecards.org/cgi-bin/carddisp.pl?gene=HSALNG0013412</a>     |
| lnc-COA6-       |                                                                  | RNA Gene       | 4  | GC01P234522 | 2.88000536  | <a href="https://www.genecards.org/cgi-bin/carddisp.pl?gene=lnc-COA6-13">https://www.genecards.org/cgi-bin/carddisp.pl?gene=lnc-COA6-13</a>         |
| RF00017-        |                                                                  | RNA Gene       | 3  | GC01M234512 | 2.88000536  | <a href="https://www.genecards.org/cgi-bin/carddisp.pl?gene=RF00017-457">https://www.genecards.org/cgi-bin/carddisp.pl?gene=RF00017-457</a>         |
| LINC01679       | Long Intergenic Non-Protein Coding RNA 1679                      | RNA Gene       | 9  | GC21M043360 | 2.876531601 | <a href="https://www.genecards.org/cgi-bin/carddisp.pl?gene=LINC01679">https://www.genecards.org/cgi-bin/carddisp.pl?gene=LINC01679</a>             |
| RTCB            | RNA 2',3'-Cyclic Phosphate And 5'-OH Ligase                      | Protein Coding | 36 | GC22M032387 | 2.847796679 | <a href="https://www.genecards.org/cgi-bin/carddisp.pl?gene=RTCB">https://www.genecards.org/cgi-bin/carddisp.pl?gene=RTCB</a>                       |
| DUSP26          | Dual Specificity Phosphatase 26                                  | Protein Coding | 37 | GC08M033591 | 2.838163137 | <a href="https://www.genecards.org/cgi-bin/carddisp.pl?gene=DUSP26">https://www.genecards.org/cgi-bin/carddisp.pl?gene=DUSP26</a>                   |
| CAPSL           | Calciphosine Like                                                | Protein Coding | 34 | GC05M035906 | 2.813187122 | <a href="https://www.genecards.org/cgi-bin/carddisp.pl?gene=CAPSL">https://www.genecards.org/cgi-bin/carddisp.pl?gene=CAPSL</a>                     |
| ENSG00000231992 |                                                                  | RNA Gene       | 8  | GC01P095120 | 2.807580948 | <a href="https://www.genecards.org/cgi-bin/carddisp.pl?gene=ENSG00000231992">https://www.genecards.org/cgi-bin/carddisp.pl?gene=ENSG00000231992</a> |
| SLC2A8          | Solute Carrier Family 2 Member 8                                 | Protein Coding | 40 | GC09P127398 | 2.771994591 | <a href="https://www.genecards.org/cgi-bin/carddisp.pl?gene=SLC2A8">https://www.genecards.org/cgi-bin/carddisp.pl?gene=SLC2A8</a>                   |
| FECHP1          | Ferrochelatase Pseudogene 1                                      | Pseudogene     | 6  | GC03P034873 | 2.76852107  | <a href="https://www.genecards.org/cgi-bin/carddisp.pl?gene=FECHP1">https://www.genecards.org/cgi-bin/carddisp.pl?gene=FECHP1</a>                   |
| LINC00322       | Long Intergenic Non-Protein Coding RNA 322                       | RNA Gene       | 17 | GC21M043322 | 2.767420769 | <a href="https://www.genecards.org/cgi-bin/carddisp.pl?gene=LINC00322">https://www.genecards.org/cgi-bin/carddisp.pl?gene=LINC00322</a>             |
| CENPM           | Centromere Protein M                                             | Protein Coding | 36 | GC22M048546 | 2.765411615 | <a href="https://www.genecards.org/cgi-bin/carddisp.pl?gene=CENPM">https://www.genecards.org/cgi-bin/carddisp.pl?gene=CENPM</a>                     |
| LOC644135       | Uncharacterized LOC644135                                        | RNA Gene       | 11 | GC06M135856 | 2.751729727 | <a href="https://www.genecards.org/cgi-bin/carddisp.pl?gene=LOC644135">https://www.genecards.org/cgi-bin/carddisp.pl?gene=LOC644135</a>             |
| LOC101928135    | Uncharacterized LOC101928135                                     | RNA Gene       | 6  | GC03M034875 | 2.745675802 | <a href="https://www.genecards.org/cgi-bin/carddisp.pl?gene=LOC101928135">https://www.genecards.org/cgi-bin/carddisp.pl?gene=LOC101928135</a>       |
| ENSG00000287092 |                                                                  | RNA Gene       | 5  | GC06M155810 | 2.735893488 | <a href="https://www.genecards.org/cgi-bin/carddisp.pl?gene=ENSG00000287092">https://www.genecards.org/cgi-bin/carddisp.pl?gene=ENSG00000287092</a> |
| COP1            | COP1 E3 Ubiquitin Ligase                                         | Protein Coding | 34 | GC01M175944 | 2.710287809 | <a href="https://www.genecards.org/cgi-bin/carddisp.pl?gene=COP1">https://www.genecards.org/cgi-bin/carddisp.pl?gene=COP1</a>                       |
| LOC389199       | Uncharacterized LOC389199                                        | Protein Coding | 17 | GC04P007939 | 2.694767237 | <a href="https://www.genecards.org/cgi-bin/carddisp.pl?gene=LOC389199">https://www.genecards.org/cgi-bin/carddisp.pl?gene=LOC389199</a>             |
| INPP4B          | Inositol Polyphosphate-4-Phosphatase Type II B                   | Protein Coding | 39 | GC04M142023 | 2.680804968 | <a href="https://www.genecards.org/cgi-bin/carddisp.pl?gene=INPP4B">https://www.genecards.org/cgi-bin/carddisp.pl?gene=INPP4B</a>                   |
| ENSG00000228852 |                                                                  | RNA Gene       | 7  | GC01M095243 | 2.677582741 | <a href="https://www.genecards.org/cgi-bin/carddisp.pl?gene=ENSG00000228852">https://www.genecards.org/cgi-bin/carddisp.pl?gene=ENSG00000228852</a> |
| ENSG00000287292 |                                                                  | RNA Gene       | 6  | GC04P148445 | 2.65933919  | <a href="https://www.genecards.org/cgi-bin/carddisp.pl?gene=ENSG00000287292">https://www.genecards.org/cgi-bin/carddisp.pl?gene=ENSG00000287292</a> |
| ENSG00000254599 |                                                                  | RNA Gene       | 5  | GC11P098676 | 2.65933919  | <a href="https://www.genecards.org/cgi-bin/carddisp.pl?gene=ENSG00000254599">https://www.genecards.org/cgi-bin/carddisp.pl?gene=ENSG00000254599</a> |
| HSALNG0133406   |                                                                  | RNA Gene       | 3  | GC21P043345 | 2.65933919  | <a href="https://www.genecards.org/cgi-bin/carddisp.pl?gene=HSALNG0133406">https://www.genecards.org/cgi-bin/carddisp.pl?gene=HSALNG0133406</a>     |
| PRR5-ARHGAP8    | PRR5-ARHGAP8 Readthrough                                         | Protein Coding | 27 | GC22P044702 | 2.655734301 | <a href="https://www.genecards.org/cgi-bin/carddisp.pl?gene=PRR5-ARHGAP8">https://www.genecards.org/cgi-bin/carddisp.pl?gene=PRR5-ARHGAP8</a>       |
| LINC01684       | Long Intergenic Non-Protein Coding RNA 1684                      | RNA Gene       | 9  | GC21P024306 | 2.652424335 | <a href="https://www.genecards.org/cgi-bin/carddisp.pl?gene=LINC01684">https://www.genecards.org/cgi-bin/carddisp.pl?gene=LINC01684</a>             |
| FAIM            | Fas Apoptotic Inhibitory Molecule                                | Protein Coding | 40 | GC03P138608 | 2.64071846  | <a href="https://www.genecards.org/cgi-bin/carddisp.pl?gene=FAIM">https://www.genecards.org/cgi-bin/carddisp.pl?gene=FAIM</a>                       |
| ATP6AP1L        | ATPase H+ Transporting Accessory Protein 1 Like                  | Protein Coding | 26 | GC05P082279 | 2.607598066 | <a href="https://www.genecards.org/cgi-bin/carddisp.pl?gene=ATP6AP1L">https://www.genecards.org/cgi-bin/carddisp.pl?gene=ATP6AP1L</a>               |
| LYPLAL1         | Lysophospholipase Like 1                                         | Protein Coding | 37 | GC01P219173 | 2.601939678 | <a href="https://www.genecards.org/cgi-bin/carddisp.pl?gene=LYPLAL1">https://www.genecards.org/cgi-bin/carddisp.pl?gene=LYPLAL1</a>                 |
| piR-37045       |                                                                  | RNA Gene       | 2  | GC22P044002 | 2.59913063  | <a href="https://www.genecards.org/cgi-bin/carddisp.pl?gene=piR-37045">https://www.genecards.org/cgi-bin/carddisp.pl?gene=piR-37045</a>             |
| HSALNG0135823   |                                                                  | RNA Gene       | 2  | GC22P043995 | 2.59913063  | <a href="https://www.genecards.org/cgi-bin/carddisp.pl?gene=HSALNG0135823">https://www.genecards.org/cgi-bin/carddisp.pl?gene=HSALNG0135823</a>     |
| RAMP3           | Receptor Activity Modifying Protein 3                            | Protein Coding | 41 | GC07P045163 | 2.592380047 | <a href="https://www.genecards.org/cgi-bin/carddisp.pl?gene=RAMP3">https://www.genecards.org/cgi-bin/carddisp.pl?gene=RAMP3</a>                     |
| REPIN1          | Replication Initiator 1                                          | Protein Coding | 34 | GC07P150368 | 2.590229988 | <a href="https://www.genecards.org/cgi-bin/carddisp.pl?gene=REPIN1">https://www.genecards.org/cgi-bin/carddisp.pl?gene=REPIN1</a>                   |
| H2BC11          | H2B Clustered Histone 11                                         | Protein Coding | 29 | GC06M046548 | 2.588163853 | <a href="https://www.genecards.org/cgi-bin/carddisp.pl?gene=H2BC11">https://www.genecards.org/cgi-bin/carddisp.pl?gene=H2BC11</a>                   |
| TPH1P1          | Triosephosphate Isomerase 1 Pseudogene                           | Pseudogene     | 7  | GC01P076699 | 2.586718082 | <a href="https://www.genecards.org/cgi-bin/carddisp.pl?gene=TPH1P1">https://www.genecards.org/cgi-bin/carddisp.pl?gene=TPH1P1</a>                   |
| TEX36-AS1       | TEX36 Antisense RNA 1                                            | RNA Gene       | 11 | GC10P125574 | 2.571750164 | <a href="https://www.genecards.org/cgi-bin/carddisp.pl?gene=TEX36-AS1">https://www.genecards.org/cgi-bin/carddisp.pl?gene=TEX36-AS1</a>             |
| ENSG00000255046 |                                                                  | RNA Gene       | 8  | GC08M011991 | 2.571750164 | <a href="https://www.genecards.org/cgi-bin/carddisp.pl?gene=ENSG00000255046">https://www.genecards.org/cgi-bin/carddisp.pl?gene=ENSG00000255046</a> |
| ENSG00000222042 |                                                                  | RNA Gene       | 6  | GC21M025169 | 2.571750164 | <a href="https://www.genecards.org/cgi-bin/carddisp.pl?gene=ENSG00000222042">https://www.genecards.org/cgi-bin/carddisp.pl?gene=ENSG00000222042</a> |
| OTX2P1          | OTX2 Pseudogene 1                                                | Pseudogene     | 5  | GC09M075724 | 2.571750164 | <a href="https://www.genecards.org/cgi-bin/carddisp.pl?gene=OTX2P1">https://www.genecards.org/cgi-bin/carddisp.pl?gene=OTX2P1</a>                   |
| lnc-JCAD-2      |                                                                  | RNA Gene       | 5  | GC10M031184 | 2.571750164 | <a href="https://www.genecards.org/cgi-bin/carddisp.pl?gene=lnc-JCAD-2">https://www.genecards.org/cgi-bin/carddisp.pl?gene=lnc-JCAD-2</a>           |
| ENSG00000237936 |                                                                  | Pseudogene     | 4  | GC10M029891 | 2.571750164 | <a href="https://www.genecards.org/cgi-bin/carddisp.pl?gene=ENSG00000237936">https://www.genecards.org/cgi-bin/carddisp.pl?gene=ENSG00000237936</a> |
| THNSL2          | Threonine Synthase Like 2                                        | Protein Coding | 33 | GC02P088170 | 2.56402421  | <a href="https://www.genecards.org/cgi-bin/carddisp.pl?gene=THNSL2">https://www.genecards.org/cgi-bin/carddisp.pl?gene=THNSL2</a>                   |
| HCAR2           | Hydroxycarboxylic Acid Receptor 2                                | Protein Coding | 38 | GC12M122701 | 2.548469543 | <a href="https://www.genecards.org/cgi-bin/carddisp.pl?gene=HCAR2">https://www.genecards.org/cgi-bin/carddisp.pl?gene=HCAR2</a>                     |
| STARP1          | Steroidogenic Acute Regulatory Protein Pseudogene 1              | Pseudogene     | 7  | GC13M065280 | 2.520123243 | <a href="https://www.genecards.org/cgi-bin/carddisp.pl?gene=STARP1">https://www.genecards.org/cgi-bin/carddisp.pl?gene=STARP1</a>                   |
| ENSG00000234389 |                                                                  | RNA Gene       | 8  | GC02P102438 | 2.508545876 | <a href="https://www.genecards.org/cgi-bin/carddisp.pl?gene=ENSG00000234389">https://www.genecards.org/cgi-bin/carddisp.pl?gene=ENSG00000234389</a> |
| ENSG00000249631 |                                                                  | RNA Gene       | 7  | GC04P014604 | 2.508545876 | <a href="https://www.genecards.org/cgi-bin/carddisp.pl?gene=ENSG00000249631">https://www.genecards.org/cgi-bin/carddisp.pl?gene=ENSG00000249631</a> |
| HSALNG0088100   |                                                                  | RNA Gene       | 4  | GC11M128462 | 2.508545876 | <a href="https://www.genecards.org/cgi-bin/carddisp.pl?gene=HSALNG0088100">https://www.genecards.org/cgi-bin/carddisp.pl?gene=HSALNG0088100</a>     |
| HSALNG0088101   |                                                                  | RNA Gene       | 4  | GC11P128480 | 2.508545876 | <a href="https://www.genecards.org/cgi-bin/carddisp.pl?gene=HSALNG0088101">https://www.genecards.org/cgi-bin/carddisp.pl?gene=HSALNG0088101</a>     |
| HSALNG0088102   |                                                                  | RNA Gene       | 4  | GC11M128489 | 2.508545876 | <a href="https://www.genecards.org/cgi-bin/carddisp.pl?gene=HSALNG0088102">https://www.genecards.org/cgi-bin/carddisp.pl?gene=HSALNG0088102</a>     |
| FNDC3B          | Fibronectin Type III Domain Containing                           | Protein Coding | 37 | GC03P172039 | 2.500176907 | <a href="https://www.genecards.org/cgi-bin/carddisp.pl?gene=FNDC3B">https://www.genecards.org/cgi-bin/carddisp.pl?gene=FNDC3B</a>                   |
| LINC00355       | Long Intergenic Non-Protein Coding RNA 355                       | RNA Gene       | 15 | GC13M063838 | 2.494673729 | <a href="https://www.genecards.org/cgi-bin/carddisp.pl?gene=LINC00355">https://www.genecards.org/cgi-bin/carddisp.pl?gene=LINC00355</a>             |
| LOC105373170    | Uncharacterized LOC105373170                                     | RNA Gene       | 6  | GC01M231768 | 2.494673729 | <a href="https://www.genecards.org/cgi-bin/carddisp.pl?gene=LOC105373170">https://www.genecards.org/cgi-bin/carddisp.pl?gene=LOC105373170</a>       |
| KRT8P18         | Keratin 8 Pseudogene 18                                          | Pseudogene     | 5  | GC03M035233 | 2.470010996 | <a href="https://www.genecards.org/cgi-bin/carddisp.pl?gene=KRT8P18">https://www.genecards.org/cgi-bin/carddisp.pl?gene=KRT8P18</a>                 |
| CTDNBP1         | CTD Nuclear Envelope Phosphatase 1                               | Protein Coding | 36 | GC17M007243 | 2.459027767 | <a href="https://www.genecards.org/cgi-bin/carddisp.pl?gene=CTDNBP1">https://www.genecards.org/cgi-bin/carddisp.pl?gene=CTDNBP1</a>                 |
| SLC9A9-AS1      | SLC9A9 Antisense RNA 1                                           | RNA Gene       | 13 | GC03P143342 | 2.457602024 | <a href="https://www.genecards.org/cgi-bin/carddisp.pl?gene=SLC9A9-AS1">https://www.genecards.org/cgi-bin/carddisp.pl?gene=SLC9A9-AS1</a>           |
| LOC100130331    | POTE Ankyrin Domain Family, Member F Pseudogene                  | Pseudogene     | 10 | GC01P237862 | 2.457602024 | <a href="https://www.genecards.org/cgi-bin/carddisp.pl?gene=LOC100130331">https://www.genecards.org/cgi-bin/carddisp.pl?gene=LOC100130331</a>       |

|                   |                                                                  |                |    |             |             |                                                                                                                                                         |
|-------------------|------------------------------------------------------------------|----------------|----|-------------|-------------|---------------------------------------------------------------------------------------------------------------------------------------------------------|
| ENSG00000257322   |                                                                  | RNA Gene       | 8  | GC12M093003 | 2.457602024 | <a href="https://www.genecards.org/cgi-bin/carddisp.pl?gene=ENSG00000257322">https://www.genecards.org/cgi-bin/carddisp.pl?gene=ENSG00000257322</a>     |
| ENSG00000236501   |                                                                  | RNA Gene       | 8  | GC02M176959 | 2.457602024 | <a href="https://www.genecards.org/cgi-bin/carddisp.pl?gene=ENSG00000236501">https://www.genecards.org/cgi-bin/carddisp.pl?gene=ENSG00000236501</a>     |
| RNU6-908P         | RNA, U6 Small Nuclear 908, Pseudogene                            | Pseudogene     | 7  | GC10P029711 | 2.457602024 | <a href="https://www.genecards.org/cgi-bin/carddisp.pl?gene=RNU6-908P">https://www.genecards.org/cgi-bin/carddisp.pl?gene=RNU6-908P</a>                 |
| ENSG00000250541   |                                                                  | RNA Gene       | 6  | GC04P025771 | 2.457602024 | <a href="https://www.genecards.org/cgi-bin/carddisp.pl?gene=ENSG00000250541">https://www.genecards.org/cgi-bin/carddisp.pl?gene=ENSG00000250541</a>     |
| ENSG00000265994   |                                                                  | RNA Gene       | 6  | GC18P028638 | 2.457602024 | <a href="https://www.genecards.org/cgi-bin/carddisp.pl?gene=ENSG00000265994">https://www.genecards.org/cgi-bin/carddisp.pl?gene=ENSG00000265994</a>     |
| ENSG00000207171   |                                                                  | RNA Gene       | 6  | GC04P168471 | 2.457602024 | <a href="https://www.genecards.org/cgi-bin/carddisp.pl?gene=ENSG00000207171">https://www.genecards.org/cgi-bin/carddisp.pl?gene=ENSG00000207171</a>     |
| EEF1A1P20         | Eukaryotic Translation Elongation Factor 1 Alpha 1 Pseudogene 20 | Pseudogene     | 5  | GC05P099996 | 2.457602024 | <a href="https://www.genecards.org/cgi-bin/carddisp.pl?gene=EEF1A1P20">https://www.genecards.org/cgi-bin/carddisp.pl?gene=EEF1A1P20</a>                 |
| RNU1-35P          | RNA, U1 Small Nuclear 35, Pseudogene                             | Pseudogene     | 5  | GC08M135742 | 2.457602024 | <a href="https://www.genecards.org/cgi-bin/carddisp.pl?gene=RNU1-35P">https://www.genecards.org/cgi-bin/carddisp.pl?gene=RNU1-35P</a>                   |
| ENSG00000235464   |                                                                  | RNA Gene       | 5  | GC07M035496 | 2.457602024 | <a href="https://www.genecards.org/cgi-bin/carddisp.pl?gene=ENSG00000235464">https://www.genecards.org/cgi-bin/carddisp.pl?gene=ENSG00000235464</a>     |
| ENSG00000236389   |                                                                  | RNA Gene       | 5  | GC06M134706 | 2.457602024 | <a href="https://www.genecards.org/cgi-bin/carddisp.pl?gene=ENSG00000236389">https://www.genecards.org/cgi-bin/carddisp.pl?gene=ENSG00000236389</a>     |
| RNU6-161P         | RNA, U6 Small Nuclear 161, Pseudogene                            | Pseudogene     | 5  | GC01P076753 | 2.457602024 | <a href="https://www.genecards.org/cgi-bin/carddisp.pl?gene=RNU6-161P">https://www.genecards.org/cgi-bin/carddisp.pl?gene=RNU6-161P</a>                 |
| MTND1P25          | MT-ND1 Pseudogene 25                                             | Pseudogene     | 4  | GC01M237942 | 2.457602024 | <a href="https://www.genecards.org/cgi-bin/carddisp.pl?gene=MTND1P25">https://www.genecards.org/cgi-bin/carddisp.pl?gene=MTND1P25</a>                   |
| ENSG00000284676   |                                                                  | RNA Gene       | 4  | GC01P029755 | 2.457602024 | <a href="https://www.genecards.org/cgi-bin/carddisp.pl?gene=ENSG00000284676">https://www.genecards.org/cgi-bin/carddisp.pl?gene=ENSG00000284676</a>     |
| ENSG00000287032   |                                                                  | RNA Gene       | 4  | GC07M035614 | 2.457602024 | <a href="https://www.genecards.org/cgi-bin/carddisp.pl?gene=ENSG00000287032">https://www.genecards.org/cgi-bin/carddisp.pl?gene=ENSG00000287032</a>     |
| ENSG00000276627   |                                                                  | RNA Gene       | 4  | GC20P060716 | 2.457602024 | <a href="https://www.genecards.org/cgi-bin/carddisp.pl?gene=ENSG00000276627">https://www.genecards.org/cgi-bin/carddisp.pl?gene=ENSG00000276627</a>     |
| HSALNG0076986     |                                                                  | RNA Gene       | 4  | GC10M031161 | 2.457602024 | <a href="https://www.genecards.org/cgi-bin/carddisp.pl?gene=HSALNG0076986">https://www.genecards.org/cgi-bin/carddisp.pl?gene=HSALNG0076986</a>         |
| lnc-CRYAA-1       |                                                                  | RNA Gene       | 4  | GC21P043350 | 2.457602024 | <a href="https://www.genecards.org/cgi-bin/carddisp.pl?gene=lnc-CRYAA-1">https://www.genecards.org/cgi-bin/carddisp.pl?gene=lnc-CRYAA-1</a>             |
| piR-55809-001     |                                                                  | RNA Gene       | 4  | GC01M095168 | 2.457602024 | <a href="https://www.genecards.org/cgi-bin/carddisp.pl?gene=piR-55809-001">https://www.genecards.org/cgi-bin/carddisp.pl?gene=piR-55809-001</a>         |
| lnc-DDX60L-3      |                                                                  | RNA Gene       | 4  | GC04M168468 | 2.457602024 | <a href="https://www.genecards.org/cgi-bin/carddisp.pl?gene=lnc-DDX60L-3">https://www.genecards.org/cgi-bin/carddisp.pl?gene=lnc-DDX60L-3</a>           |
| LOC102723733      | Uncharacterized LOC102723733                                     | RNA Gene       | 3  | GC04P025862 | 2.457602024 | <a href="https://www.genecards.org/cgi-bin/carddisp.pl?gene=LOC102723733">https://www.genecards.org/cgi-bin/carddisp.pl?gene=LOC102723733</a>           |
| ENSG00000270927   |                                                                  | Pseudogene     | 3  | GC01M029904 | 2.457602024 | <a href="https://www.genecards.org/cgi-bin/carddisp.pl?gene=ENSG00000270927">https://www.genecards.org/cgi-bin/carddisp.pl?gene=ENSG00000270927</a>     |
| ENSG00000226973   |                                                                  | Pseudogene     | 3  | GC01P115471 | 2.457602024 | <a href="https://www.genecards.org/cgi-bin/carddisp.pl?gene=ENSG00000226973">https://www.genecards.org/cgi-bin/carddisp.pl?gene=ENSG00000226973</a>     |
| LOC107986198      | Uncharacterized LOC107986198                                     | RNA Gene       | 3  | GC04M168488 | 2.457602024 | <a href="https://www.genecards.org/cgi-bin/carddisp.pl?gene=LOC107986198">https://www.genecards.org/cgi-bin/carddisp.pl?gene=LOC107986198</a>           |
| lnc-EDRF1-4       |                                                                  | RNA Gene       | 3  | GC10P125590 | 2.457602024 | <a href="https://www.genecards.org/cgi-bin/carddisp.pl?gene=lnc-EDRF1-4">https://www.genecards.org/cgi-bin/carddisp.pl?gene=lnc-EDRF1-4</a>             |
| HSALNG0038430     |                                                                  | RNA Gene       | 3  | GC04P168487 | 2.457602024 | <a href="https://www.genecards.org/cgi-bin/carddisp.pl?gene=HSALNG0038430">https://www.genecards.org/cgi-bin/carddisp.pl?gene=HSALNG0038430</a>         |
| HSALNG0029504     |                                                                  | RNA Gene       | 3  | GC03P143161 | 2.457602024 | <a href="https://www.genecards.org/cgi-bin/carddisp.pl?gene=HSALNG0029504">https://www.genecards.org/cgi-bin/carddisp.pl?gene=HSALNG0029504</a>         |
| HSALNG0076987-001 |                                                                  | RNA Gene       | 3  | GC10P029811 | 2.457602024 | <a href="https://www.genecards.org/cgi-bin/carddisp.pl?gene=HSALNG0076987-001">https://www.genecards.org/cgi-bin/carddisp.pl?gene=HSALNG0076987-001</a> |
| HSALNG0076987-002 |                                                                  | RNA Gene       | 3  | GC10P029812 | 2.457602024 | <a href="https://www.genecards.org/cgi-bin/carddisp.pl?gene=HSALNG0076987-002">https://www.genecards.org/cgi-bin/carddisp.pl?gene=HSALNG0076987-002</a> |
| lnc-AIFM2-3       |                                                                  | RNA Gene       | 3  | GC10M069839 | 2.457602024 | <a href="https://www.genecards.org/cgi-bin/carddisp.pl?gene=lnc-AIFM2-3">https://www.genecards.org/cgi-bin/carddisp.pl?gene=lnc-AIFM2-3</a>             |
| HSALNG0093093     |                                                                  | RNA Gene       | 3  | GC12M093112 | 2.457602024 | <a href="https://www.genecards.org/cgi-bin/carddisp.pl?gene=HSALNG0093093">https://www.genecards.org/cgi-bin/carddisp.pl?gene=HSALNG0093093</a>         |
| piR-38051-198     |                                                                  | RNA Gene       | 3  | GC04M025877 | 2.457602024 | <a href="https://www.genecards.org/cgi-bin/carddisp.pl?gene=piR-38051-198">https://www.genecards.org/cgi-bin/carddisp.pl?gene=piR-38051-198</a>         |
| piR-41195-080     |                                                                  | RNA Gene       | 3  | GC08M012002 | 2.457602024 | <a href="https://www.genecards.org/cgi-bin/carddisp.pl?gene=piR-41195-080">https://www.genecards.org/cgi-bin/carddisp.pl?gene=piR-41195-080</a>         |
| piR-59297-626     |                                                                  | RNA Gene       | 3  | GC08P011819 | 2.457602024 | <a href="https://www.genecards.org/cgi-bin/carddisp.pl?gene=piR-59297-626">https://www.genecards.org/cgi-bin/carddisp.pl?gene=piR-59297-626</a>         |
| AB372775          |                                                                  | RNA Gene       | 2  | GC10P069827 | 2.457602024 | <a href="https://www.genecards.org/cgi-bin/carddisp.pl?gene=AB372775">https://www.genecards.org/cgi-bin/carddisp.pl?gene=AB372775</a>                   |
| HSALNG0029512     |                                                                  | RNA Gene       | 2  | GC03P143373 | 2.457602024 | <a href="https://www.genecards.org/cgi-bin/carddisp.pl?gene=HSALNG0029512">https://www.genecards.org/cgi-bin/carddisp.pl?gene=HSALNG0029512</a>         |
| HSALNG0093097     |                                                                  | RNA Gene       | 2  | GC12M093154 | 2.457602024 | <a href="https://www.genecards.org/cgi-bin/carddisp.pl?gene=HSALNG0093097">https://www.genecards.org/cgi-bin/carddisp.pl?gene=HSALNG0093097</a>         |
| piR-31109-001     |                                                                  | RNA Gene       | 2  | GC10P125633 | 2.457602024 | <a href="https://www.genecards.org/cgi-bin/carddisp.pl?gene=piR-31109-001">https://www.genecards.org/cgi-bin/carddisp.pl?gene=piR-31109-001</a>         |
| piR-57133-376     |                                                                  | RNA Gene       | 2  | GC20P060683 | 2.457602024 | <a href="https://www.genecards.org/cgi-bin/carddisp.pl?gene=piR-57133-376">https://www.genecards.org/cgi-bin/carddisp.pl?gene=piR-57133-376</a>         |
| HSALNG0131408     |                                                                  | RNA Gene       | 2  | GC20M060680 | 2.457602024 | <a href="https://www.genecards.org/cgi-bin/carddisp.pl?gene=HSALNG0131408">https://www.genecards.org/cgi-bin/carddisp.pl?gene=HSALNG0131408</a>         |
| ENSG00000254939   |                                                                  | Pseudogene     | 1  | GC11M098568 | 2.457602024 | <a href="https://www.genecards.org/cgi-bin/carddisp.pl?gene=ENSG00000254939">https://www.genecards.org/cgi-bin/carddisp.pl?gene=ENSG00000254939</a>     |
| HSALNG0068856     |                                                                  | RNA Gene       | 1  | GC08M135698 | 2.457602024 | <a href="https://www.genecards.org/cgi-bin/carddisp.pl?gene=HSALNG0068856">https://www.genecards.org/cgi-bin/carddisp.pl?gene=HSALNG0068856</a>         |
| POT1-AS1          | POT1 Antisense RNA 1                                             | RNA Gene       | 15 | GC07P124929 | 2.442903757 | <a href="https://www.genecards.org/cgi-bin/carddisp.pl?gene=POT1-AS1">https://www.genecards.org/cgi-bin/carddisp.pl?gene=POT1-AS1</a>                   |
| PBX2P1            | PBX Homeobox 2 Pseudogene 1                                      | Pseudogene     | 11 | GC03P143176 | 2.440346241 | <a href="https://www.genecards.org/cgi-bin/carddisp.pl?gene=PBX2P1">https://www.genecards.org/cgi-bin/carddisp.pl?gene=PBX2P1</a>                       |
| MAS1              | MAS1 Proto-Oncogene, G Protein-Coupled Receptor                  | Protein Coding | 40 | GC06P159906 | 2.435238361 | <a href="https://www.genecards.org/cgi-bin/carddisp.pl?gene=MAS1">https://www.genecards.org/cgi-bin/carddisp.pl?gene=MAS1</a>                           |
| LINC02629         | Long Intergenic Non-Protein Coding RNA 2629                      | RNA Gene       | 6  | GC10P033910 | 2.434705019 | <a href="https://www.genecards.org/cgi-bin/carddisp.pl?gene=LINC02629">https://www.genecards.org/cgi-bin/carddisp.pl?gene=LINC02629</a>                 |
| RNU6-976P         | RNA, U6 Small Nuclear 976, Pseudogene                            | Pseudogene     | 5  | GC14P084739 | 2.434705019 | <a href="https://www.genecards.org/cgi-bin/carddisp.pl?gene=RNU6-976P">https://www.genecards.org/cgi-bin/carddisp.pl?gene=RNU6-976P</a>                 |
| lnc-TRIB1-7       |                                                                  | RNA Gene       | 4  | GC08P125495 | 2.434705019 | <a href="https://www.genecards.org/cgi-bin/carddisp.pl?gene=lnc-TRIB1-7">https://www.genecards.org/cgi-bin/carddisp.pl?gene=lnc-TRIB1-7</a>             |
| ENSG00000268473   |                                                                  | Pseudogene     | 2  | GC16M086434 | 2.434705019 | <a href="https://www.genecards.org/cgi-bin/carddisp.pl?gene=ENSG00000268473">https://www.genecards.org/cgi-bin/carddisp.pl?gene=ENSG00000268473</a>     |
| HSALNG0055801     |                                                                  | RNA Gene       | 2  | GC07P004174 | 2.434705019 | <a href="https://www.genecards.org/cgi-bin/carddisp.pl?gene=HSALNG0055801">https://www.genecards.org/cgi-bin/carddisp.pl?gene=HSALNG0055801</a>         |
| ZNF300            | Zinc Finger Protein 300                                          | Protein Coding | 37 | GC05M150894 | 2.425186634 | <a href="https://www.genecards.org/cgi-bin/carddisp.pl?gene=ZNF300">https://www.genecards.org/cgi-bin/carddisp.pl?gene=ZNF300</a>                       |
| ST13P12           | ST13, Hsp70 Interacting Protein Pseudogene 12                    | Pseudogene     | 6  | GC05P082968 | 2.425083399 | <a href="https://www.genecards.org/cgi-bin/carddisp.pl?gene=ST13P12">https://www.genecards.org/cgi-bin/carddisp.pl?gene=ST13P12</a>                     |
| MIR190B           | MicroRNA 190b                                                    | RNA Gene       | 15 | GC01M154193 | 2.424841881 | <a href="https://www.genecards.org/cgi-bin/carddisp.pl?gene=MIR190B">https://www.genecards.org/cgi-bin/carddisp.pl?gene=MIR190B</a>                     |
| CLGN              | Calmequin                                                        | Protein Coding | 37 | GC04M140388 | 2.420041561 | <a href="https://www.genecards.org/cgi-bin/carddisp.pl?gene=CLGN">https://www.genecards.org/cgi-bin/carddisp.pl?gene=CLGN</a>                           |
| LINC02789         | Long Intergenic Non-Protein Coding RNA 2789                      | RNA Gene       | 8  | GC01P199149 | 2.383283615 | <a href="https://www.genecards.org/cgi-bin/carddisp.pl?gene=LINC02789">https://www.genecards.org/cgi-bin/carddisp.pl?gene=LINC02789</a>                 |
| IGHG4             | Immunoglobulin Heavy Constant Gamma 4 (G4m Marker)               | Protein Coding | 27 | GC14M110309 | 2.380206108 | <a href="https://www.genecards.org/cgi-bin/carddisp.pl?gene=IGHG4">https://www.genecards.org/cgi-bin/carddisp.pl?gene=IGHG4</a>                         |
| ARPC4             | Actin Related Protein 2/3 Complex                                | Protein Coding | 38 | GC03P009792 | 2.371128082 | <a href="https://www.genecards.org/cgi-bin/carddisp.pl?gene=ARPC4">https://www.genecards.org/cgi-bin/carddisp.pl?gene=ARPC4</a>                         |
| ENSG00000286231   |                                                                  | Protein Coding | 5  | GC01P220787 | 2.362083912 | <a href="https://www.genecards.org/cgi-bin/carddisp.pl?gene=ENSG00000286231">https://www.genecards.org/cgi-bin/carddisp.pl?gene=ENSG00000286231</a>     |
| PSAPL1            | Prosaposin Like 1                                                | Protein Coding | 33 | GC04M007434 | 2.347115993 | <a href="https://www.genecards.org/cgi-bin/carddisp.pl?gene=PSAPL1">https://www.genecards.org/cgi-bin/carddisp.pl?gene=PSAPL1</a>                       |
| ENSG00000248537   |                                                                  | RNA Gene       | 7  | GC05P009363 | 2.347115993 | <a href="https://www.genecards.org/cgi-bin/carddisp.pl?gene=ENSG00000248537">https://www.genecards.org/cgi-bin/carddisp.pl?gene=ENSG00000248537</a>     |
| ENSG00000250001   |                                                                  | RNA Gene       | 7  | GC05M009519 | 2.347115993 | <a href="https://www.genecards.org/cgi-bin/carddisp.pl?gene=ENSG00000250001">https://www.genecards.org/cgi-bin/carddisp.pl?gene=ENSG00000250001</a>     |
| HNRNPA1P58        | Heterogeneous Nuclear Ribonucleoprotein A1 Pseudogene 58         | Pseudogene     | 4  | GC06P024003 | 2.347115993 | <a href="https://www.genecards.org/cgi-bin/carddisp.pl?gene=HNRNPA1P58">https://www.genecards.org/cgi-bin/carddisp.pl?gene=HNRNPA1P58</a>               |
| LOC101060035      | DnaJ Homolog Subfamily C Member 24 Pseudogene                    | Pseudogene     | 4  | GC05M133720 | 2.347115993 | <a href="https://www.genecards.org/cgi-bin/carddisp.pl?gene=LOC101060035">https://www.genecards.org/cgi-bin/carddisp.pl?gene=LOC101060035</a>           |

|                 |                                                                       |                |    |             |             |                                                                                                                                                     |
|-----------------|-----------------------------------------------------------------------|----------------|----|-------------|-------------|-----------------------------------------------------------------------------------------------------------------------------------------------------|
| HSALNG0040068   |                                                                       | RNA Gene       | 4  | GC05M009421 | 2.347115993 | <a href="https://www.genecards.org/cgi-bin/carddisp.pl?gene=HSALNG0040068">https://www.genecards.org/cgi-bin/carddisp.pl?gene=HSALNG0040068</a>     |
| Inc-PPP1CC-3    |                                                                       | RNA Gene       | 4  | GC12M110993 | 2.347115993 | <a href="https://www.genecards.org/cgi-bin/carddisp.pl?gene=Inc-PPP1CC-3">https://www.genecards.org/cgi-bin/carddisp.pl?gene=Inc-PPP1CC-3</a>       |
| LINC00888       | Long Intergenic Non-Protein Coding RNA 888                            | RNA Gene       | 13 | GC03P183447 | 2.341049671 | <a href="https://www.genecards.org/cgi-bin/carddisp.pl?gene=LINC00888">https://www.genecards.org/cgi-bin/carddisp.pl?gene=LINC00888</a>             |
| LINC01090       | Long Intergenic Non-Protein Coding RNA 1090                           | RNA Gene       | 13 | GC02M187712 | 2.334821939 | <a href="https://www.genecards.org/cgi-bin/carddisp.pl?gene=LINC01090">https://www.genecards.org/cgi-bin/carddisp.pl?gene=LINC01090</a>             |
| ENSG00000274121 |                                                                       | RNA Gene       | 5  | GC01P231814 | 2.334821939 | <a href="https://www.genecards.org/cgi-bin/carddisp.pl?gene=ENSG00000274121">https://www.genecards.org/cgi-bin/carddisp.pl?gene=ENSG00000274121</a> |
| MIR378C         | MicroRNA 378c                                                         | RNA Gene       | 13 | GC10M130962 | 2.284116507 | <a href="https://www.genecards.org/cgi-bin/carddisp.pl?gene=MIR378C">https://www.genecards.org/cgi-bin/carddisp.pl?gene=MIR378C</a>                 |
| SLC23A4P        | Solute Carrier Family 23 Member 4, Pseudogene                         | Pseudogene     | 7  | GC07M135247 | 2.283819199 | <a href="https://www.genecards.org/cgi-bin/carddisp.pl?gene=SLC23A4P">https://www.genecards.org/cgi-bin/carddisp.pl?gene=SLC23A4P</a>               |
| H2BC18          | H2B Clustered Histone 18                                              | Protein Coding | 27 | GC01M150113 | 2.279964924 | <a href="https://www.genecards.org/cgi-bin/carddisp.pl?gene=H2BC18">https://www.genecards.org/cgi-bin/carddisp.pl?gene=H2BC18</a>                   |
| MIR4772         | MicroRNA 4772                                                         | RNA Gene       | 13 | GC02P102432 | 2.269135475 | <a href="https://www.genecards.org/cgi-bin/carddisp.pl?gene=MIR4772">https://www.genecards.org/cgi-bin/carddisp.pl?gene=MIR4772</a>                 |
| RAB24           | RAB24, Member RAS Oncogene Family                                     | Protein Coding | 37 | GC05M177301 | 2.254528522 | <a href="https://www.genecards.org/cgi-bin/carddisp.pl?gene=RAB24">https://www.genecards.org/cgi-bin/carddisp.pl?gene=RAB24</a>                     |
| HMCE5           | 5-Hydroxymethylcytosine Binding, ES Cell Specific                     | Protein Coding | 31 | GC03P129278 | 2.237731934 | <a href="https://www.genecards.org/cgi-bin/carddisp.pl?gene=HMCE5">https://www.genecards.org/cgi-bin/carddisp.pl?gene=HMCE5</a>                     |
| CPB2-AS1        | CPB2 Antisense RNA 1                                                  | RNA Gene       | 14 | GC13P046052 | 2.232967854 | <a href="https://www.genecards.org/cgi-bin/carddisp.pl?gene=CPB2-AS1">https://www.genecards.org/cgi-bin/carddisp.pl?gene=CPB2-AS1</a>               |
| LINC01029       | Long Intergenic Non-Protein Coding RNA 1029                           | RNA Gene       | 12 | GC18M077972 | 2.232967854 | <a href="https://www.genecards.org/cgi-bin/carddisp.pl?gene=LINC01029">https://www.genecards.org/cgi-bin/carddisp.pl?gene=LINC01029</a>             |
| HDHD5-AS1       | HDHD5 Antisense RNA 1                                                 | RNA Gene       | 12 | GC22P017160 | 2.232967854 | <a href="https://www.genecards.org/cgi-bin/carddisp.pl?gene=HDHD5-AS1">https://www.genecards.org/cgi-bin/carddisp.pl?gene=HDHD5-AS1</a>             |
| LINC02534       | Long Intergenic Non-Protein Coding RNA 2534                           | RNA Gene       | 9  | GC06M115635 | 2.232967854 | <a href="https://www.genecards.org/cgi-bin/carddisp.pl?gene=LINC02534">https://www.genecards.org/cgi-bin/carddisp.pl?gene=LINC02534</a>             |
| LINC02392       | Long Intergenic Non-Protein Coding RNA 2392                           | RNA Gene       | 9  | GC12P090282 | 2.232967854 | <a href="https://www.genecards.org/cgi-bin/carddisp.pl?gene=LINC02392">https://www.genecards.org/cgi-bin/carddisp.pl?gene=LINC02392</a>             |
| SNORA63E        | Small Nucleolar RNA, H/ACA Box 63E                                    | RNA Gene       | 9  | GC03P183457 | 2.232967854 | <a href="https://www.genecards.org/cgi-bin/carddisp.pl?gene=SNORA63E">https://www.genecards.org/cgi-bin/carddisp.pl?gene=SNORA63E</a>               |
| LINC01818       | Long Intergenic Non-Protein Coding RNA 1818                           | RNA Gene       | 8  | GC02P150170 | 2.232967854 | <a href="https://www.genecards.org/cgi-bin/carddisp.pl?gene=LINC01818">https://www.genecards.org/cgi-bin/carddisp.pl?gene=LINC01818</a>             |
| SNORA63D        | Small Nucleolar RNA, H/ACA Box 63D                                    | RNA Gene       | 8  | GC03P183470 | 2.232967854 | <a href="https://www.genecards.org/cgi-bin/carddisp.pl?gene=SNORA63D">https://www.genecards.org/cgi-bin/carddisp.pl?gene=SNORA63D</a>               |
| ENSG00000243273 |                                                                       | RNA Gene       | 8  | GC03P150764 | 2.232967854 | <a href="https://www.genecards.org/cgi-bin/carddisp.pl?gene=ENSG00000243273">https://www.genecards.org/cgi-bin/carddisp.pl?gene=ENSG00000243273</a> |
| ENSG00000251152 |                                                                       | RNA Gene       | 7  | GC04P014575 | 2.232967854 | <a href="https://www.genecards.org/cgi-bin/carddisp.pl?gene=ENSG00000251152">https://www.genecards.org/cgi-bin/carddisp.pl?gene=ENSG00000251152</a> |
| ENSG00000249664 |                                                                       | RNA Gene       | 7  | GC05M083012 | 2.232967854 | <a href="https://www.genecards.org/cgi-bin/carddisp.pl?gene=ENSG00000249664">https://www.genecards.org/cgi-bin/carddisp.pl?gene=ENSG00000249664</a> |
| ENSG00000251186 |                                                                       | RNA Gene       | 7  | GC04M008455 | 2.232967854 | <a href="https://www.genecards.org/cgi-bin/carddisp.pl?gene=ENSG00000251186">https://www.genecards.org/cgi-bin/carddisp.pl?gene=ENSG00000251186</a> |
| ENSG00000260234 |                                                                       | Protein Coding | 7  | GC03M150882 | 2.232967854 | <a href="https://www.genecards.org/cgi-bin/carddisp.pl?gene=ENSG00000260234">https://www.genecards.org/cgi-bin/carddisp.pl?gene=ENSG00000260234</a> |
| LINC02822       | Long Intergenic Non-Protein Coding RNA 2822                           | RNA Gene       | 6  | GC12P090411 | 2.232967854 | <a href="https://www.genecards.org/cgi-bin/carddisp.pl?gene=LINC02822">https://www.genecards.org/cgi-bin/carddisp.pl?gene=LINC02822</a>             |
| ENSG00000252040 |                                                                       | RNA Gene       | 6  | GC16M068630 | 2.232967854 | <a href="https://www.genecards.org/cgi-bin/carddisp.pl?gene=ENSG00000252040">https://www.genecards.org/cgi-bin/carddisp.pl?gene=ENSG00000252040</a> |
| ENSG00000253092 |                                                                       | RNA Gene       | 6  | GC03P183452 | 2.232967854 | <a href="https://www.genecards.org/cgi-bin/carddisp.pl?gene=ENSG00000253092">https://www.genecards.org/cgi-bin/carddisp.pl?gene=ENSG00000253092</a> |
| ENSG00000253354 |                                                                       | RNA Gene       | 6  | GC08P040370 | 2.232967854 | <a href="https://www.genecards.org/cgi-bin/carddisp.pl?gene=ENSG00000253354">https://www.genecards.org/cgi-bin/carddisp.pl?gene=ENSG00000253354</a> |
| ENSG00000272479 |                                                                       | RNA Gene       | 6  | GC08M040519 | 2.232967854 | <a href="https://www.genecards.org/cgi-bin/carddisp.pl?gene=ENSG00000272479">https://www.genecards.org/cgi-bin/carddisp.pl?gene=ENSG00000272479</a> |
| ENSG00000234481 |                                                                       | RNA Gene       | 6  | GC01P036773 | 2.232967854 | <a href="https://www.genecards.org/cgi-bin/carddisp.pl?gene=ENSG00000234481">https://www.genecards.org/cgi-bin/carddisp.pl?gene=ENSG00000234481</a> |
| ENSG00000241679 |                                                                       | RNA Gene       | 6  | GC03P143123 | 2.232967854 | <a href="https://www.genecards.org/cgi-bin/carddisp.pl?gene=ENSG00000241679">https://www.genecards.org/cgi-bin/carddisp.pl?gene=ENSG00000241679</a> |
| RPL35AP33       | Ribosomal Protein L35a Pseudogene 33                                  | Pseudogene     | 6  | GC16M068489 | 2.232967854 | <a href="https://www.genecards.org/cgi-bin/carddisp.pl?gene=RPL35AP33">https://www.genecards.org/cgi-bin/carddisp.pl?gene=RPL35AP33</a>             |
| RNU6-655P       | RNA, U6 Small Nuclear 655, Pseudogene                                 | Pseudogene     | 6  | GC18P078036 | 2.232967854 | <a href="https://www.genecards.org/cgi-bin/carddisp.pl?gene=RNU6-655P">https://www.genecards.org/cgi-bin/carddisp.pl?gene=RNU6-655P</a>             |
| LGMNP1          | Legumain Pseudogene 1                                                 | Pseudogene     | 6  | GC13M064957 | 2.232967854 | <a href="https://www.genecards.org/cgi-bin/carddisp.pl?gene=LGMNP1">https://www.genecards.org/cgi-bin/carddisp.pl?gene=LGMNP1</a>                   |
| ENSG00000248112 |                                                                       | RNA Gene       | 6  | GC05M082907 | 2.232967854 | <a href="https://www.genecards.org/cgi-bin/carddisp.pl?gene=ENSG00000248112">https://www.genecards.org/cgi-bin/carddisp.pl?gene=ENSG00000248112</a> |
| HNRNPA3P5       | Heterogeneous Nuclear Ribonucleoprotein A3 Pseudogene 5               | Pseudogene     | 5  | GC13M065787 | 2.232967854 | <a href="https://www.genecards.org/cgi-bin/carddisp.pl?gene=HNRNPA3P5">https://www.genecards.org/cgi-bin/carddisp.pl?gene=HNRNPA3P5</a>             |
| ENSG00000272823 |                                                                       | RNA Gene       | 5  | GC01M220828 | 2.232967854 | <a href="https://www.genecards.org/cgi-bin/carddisp.pl?gene=ENSG00000272823">https://www.genecards.org/cgi-bin/carddisp.pl?gene=ENSG00000272823</a> |
| ENSG00000259080 |                                                                       | RNA Gene       | 5  | GC02P027583 | 2.232967854 | <a href="https://www.genecards.org/cgi-bin/carddisp.pl?gene=ENSG00000259080">https://www.genecards.org/cgi-bin/carddisp.pl?gene=ENSG00000259080</a> |
| ENSG00000254171 |                                                                       | RNA Gene       | 5  | GC05P166128 | 2.232967854 | <a href="https://www.genecards.org/cgi-bin/carddisp.pl?gene=ENSG00000254171">https://www.genecards.org/cgi-bin/carddisp.pl?gene=ENSG00000254171</a> |
| ENSG00000251730 |                                                                       | RNA Gene       | 5  | GC03P183454 | 2.232967854 | <a href="https://www.genecards.org/cgi-bin/carddisp.pl?gene=ENSG00000251730">https://www.genecards.org/cgi-bin/carddisp.pl?gene=ENSG00000251730</a> |
| ENSG00000197462 |                                                                       | RNA Gene       | 5  | GC07P125917 | 2.232967854 | <a href="https://www.genecards.org/cgi-bin/carddisp.pl?gene=ENSG00000197462">https://www.genecards.org/cgi-bin/carddisp.pl?gene=ENSG00000197462</a> |
| ENSG00000234034 |                                                                       | RNA Gene       | 5  | GC21M022500 | 2.232967854 | <a href="https://www.genecards.org/cgi-bin/carddisp.pl?gene=ENSG00000234034">https://www.genecards.org/cgi-bin/carddisp.pl?gene=ENSG00000234034</a> |
| ENSG00000235503 |                                                                       | RNA Gene       | 5  | GC07P083355 | 2.232967854 | <a href="https://www.genecards.org/cgi-bin/carddisp.pl?gene=ENSG00000235503">https://www.genecards.org/cgi-bin/carddisp.pl?gene=ENSG00000235503</a> |
| LOC107987158    | Uncharacterized LOC107987158                                          | Protein Coding | 5  | GC11M003142 | 2.232967854 | <a href="https://www.genecards.org/cgi-bin/carddisp.pl?gene=LOC107987158">https://www.genecards.org/cgi-bin/carddisp.pl?gene=LOC107987158</a>       |
| MRPL45P1        | Mitochondrial Ribosomal Protein L45 Pseudogene 1                      | Pseudogene     | 5  | GC02M088428 | 2.232967854 | <a href="https://www.genecards.org/cgi-bin/carddisp.pl?gene=MRPL45P1">https://www.genecards.org/cgi-bin/carddisp.pl?gene=MRPL45P1</a>               |
| RPL23AP20       | Ribosomal Protein L23a Pseudogene 20                                  | Pseudogene     | 5  | GC01P241916 | 2.232967854 | <a href="https://www.genecards.org/cgi-bin/carddisp.pl?gene=RPL23AP20">https://www.genecards.org/cgi-bin/carddisp.pl?gene=RPL23AP20</a>             |
| RNU6-1172P      | RNA, U6 Small Nuclear 1172, Pseudogene                                | Pseudogene     | 5  | GC08M096431 | 2.232967854 | <a href="https://www.genecards.org/cgi-bin/carddisp.pl?gene=RNU6-1172P">https://www.genecards.org/cgi-bin/carddisp.pl?gene=RNU6-1172P</a>           |
| Inc-PNPLA5-3    |                                                                       | RNA Gene       | 5  | GC22M048943 | 2.232967854 | <a href="https://www.genecards.org/cgi-bin/carddisp.pl?gene=Inc-PNPLA5-3">https://www.genecards.org/cgi-bin/carddisp.pl?gene=Inc-PNPLA5-3</a>       |
| ENSG00000271682 |                                                                       | Pseudogene     | 4  | GC03M183462 | 2.232967854 | <a href="https://www.genecards.org/cgi-bin/carddisp.pl?gene=ENSG00000271682">https://www.genecards.org/cgi-bin/carddisp.pl?gene=ENSG00000271682</a> |
| ENSG00000233983 |                                                                       | Pseudogene     | 4  | GC01P099464 | 2.232967854 | <a href="https://www.genecards.org/cgi-bin/carddisp.pl?gene=ENSG00000233983">https://www.genecards.org/cgi-bin/carddisp.pl?gene=ENSG00000233983</a> |
| Inc-TSNAX-2     |                                                                       | RNA Gene       | 4  | GC01P231693 | 2.232967854 | <a href="https://www.genecards.org/cgi-bin/carddisp.pl?gene=Inc-TSNAX-2">https://www.genecards.org/cgi-bin/carddisp.pl?gene=Inc-TSNAX-2</a>         |
| SDR42E1P5       | Short Chain Dehydrogenase/Reductase Family 42E, Member 1 Pseudogene 5 | Pseudogene     | 4  | GC02P102412 | 2.232967854 | <a href="https://www.genecards.org/cgi-bin/carddisp.pl?gene=SDR42E1P5">https://www.genecards.org/cgi-bin/carddisp.pl?gene=SDR42E1P5</a>             |
| ENSG00000288092 |                                                                       | RNA Gene       | 4  | GC12P103013 | 2.232967854 | <a href="https://www.genecards.org/cgi-bin/carddisp.pl?gene=ENSG00000288092">https://www.genecards.org/cgi-bin/carddisp.pl?gene=ENSG00000288092</a> |
| Inc-FAM122A-1   |                                                                       | RNA Gene       | 4  | GC09P068711 | 2.232967854 | <a href="https://www.genecards.org/cgi-bin/carddisp.pl?gene=Inc-FAM122A-1">https://www.genecards.org/cgi-bin/carddisp.pl?gene=Inc-FAM122A-1</a>     |
| Inc-MRGPRG-1    |                                                                       | RNA Gene       | 4  | GC11M003146 | 2.232967854 | <a href="https://www.genecards.org/cgi-bin/carddisp.pl?gene=Inc-MRGPRG-1">https://www.genecards.org/cgi-bin/carddisp.pl?gene=Inc-MRGPRG-1</a>       |
| Inc-RHOB-1      |                                                                       | RNA Gene       | 4  | GC02P020182 | 2.232967854 | <a href="https://www.genecards.org/cgi-bin/carddisp.pl?gene=Inc-RHOB-1">https://www.genecards.org/cgi-bin/carddisp.pl?gene=Inc-RHOB-1</a>           |
| Inc-SLC46A3-1   |                                                                       | RNA Gene       | 4  | GC13M028701 | 2.232967854 | <a href="https://www.genecards.org/cgi-bin/carddisp.pl?gene=Inc-SLC46A3-1">https://www.genecards.org/cgi-bin/carddisp.pl?gene=Inc-SLC46A3-1</a>     |
| Inc-WDR91-1     |                                                                       | RNA Gene       | 4  | GC07M135225 | 2.232967854 | <a href="https://www.genecards.org/cgi-bin/carddisp.pl?gene=Inc-WDR91-1">https://www.genecards.org/cgi-bin/carddisp.pl?gene=Inc-WDR91-1</a>         |
| HSALNG0071703   |                                                                       | RNA Gene       | 4  | GC09M068727 | 2.232967854 | <a href="https://www.genecards.org/cgi-bin/carddisp.pl?gene=HSALNG0071703">https://www.genecards.org/cgi-bin/carddisp.pl?gene=HSALNG0071703</a>     |
| Inc-MYL2-4      |                                                                       | RNA Gene       | 4  | GC12M110918 | 2.232967854 | <a href="https://www.genecards.org/cgi-bin/carddisp.pl?gene=Inc-MYL2-4">https://www.genecards.org/cgi-bin/carddisp.pl?gene=Inc-MYL2-4</a>           |
| MN309223        |                                                                       | RNA Gene       | 4  | GC11P003129 | 2.232967854 | <a href="https://www.genecards.org/cgi-bin/carddisp.pl?gene=MN309223">https://www.genecards.org/cgi-bin/carddisp.pl?gene=MN309223</a>               |
| ENSG00000275383 |                                                                       | RNA Gene       | 3  | GC16P068591 | 2.232967854 | <a href="https://www.genecards.org/cgi-bin/carddisp.pl?gene=ENSG00000275383">https://www.genecards.org/cgi-bin/carddisp.pl?gene=ENSG00000275383</a> |
| ENSG00000225906 |                                                                       | Pseudogene     | 3  | GC21P022882 | 2.232967854 | <a href="https://www.genecards.org/cgi-bin/carddisp.pl?gene=ENSG00000225906">https://www.genecards.org/cgi-bin/carddisp.pl?gene=ENSG00000225906</a> |

|                   |                                                                 |                |    |             |             |                                                                                                                                                         |
|-------------------|-----------------------------------------------------------------|----------------|----|-------------|-------------|---------------------------------------------------------------------------------------------------------------------------------------------------------|
| ENSG00000231984   |                                                                 | Pseudogene     | 3  | GC01P199753 | 2.232967854 | <a href="https://www.genecards.org/cgi-bin/carddisp.pl?gene=ENSG00000231984">https://www.genecards.org/cgi-bin/carddisp.pl?gene=ENSG00000231984</a>     |
| lnc-TRIB1-8       |                                                                 | RNA Gene       | 3  | GC08P125497 | 2.232967854 | <a href="https://www.genecards.org/cgi-bin/carddisp.pl?gene=lnc-TRIB1-8">https://www.genecards.org/cgi-bin/carddisp.pl?gene=lnc-TRIB1-8</a>             |
| HSALNG0017419     |                                                                 | RNA Gene       | 3  | GC02P102419 | 2.232967854 | <a href="https://www.genecards.org/cgi-bin/carddisp.pl?gene=HSALNG0017419">https://www.genecards.org/cgi-bin/carddisp.pl?gene=HSALNG0017419</a>         |
| ENSG00000287720   |                                                                 | RNA Gene       | 3  | GC03P003918 | 2.232967854 | <a href="https://www.genecards.org/cgi-bin/carddisp.pl?gene=ENSG00000287720">https://www.genecards.org/cgi-bin/carddisp.pl?gene=ENSG00000287720</a>     |
| lnc-BICD1-6       |                                                                 | RNA Gene       | 3  | GC12P031995 | 2.232967854 | <a href="https://www.genecards.org/cgi-bin/carddisp.pl?gene=lnc-BICD1-6">https://www.genecards.org/cgi-bin/carddisp.pl?gene=lnc-BICD1-6</a>             |
| HSALNG0023242     |                                                                 | RNA Gene       | 3  | GC02M235672 | 2.232967854 | <a href="https://www.genecards.org/cgi-bin/carddisp.pl?gene=HSALNG0023242">https://www.genecards.org/cgi-bin/carddisp.pl?gene=HSALNG0023242</a>         |
| HSALNG0113292     |                                                                 | RNA Gene       | 3  | GC16P086387 | 2.232967854 | <a href="https://www.genecards.org/cgi-bin/carddisp.pl?gene=HSALNG0113292">https://www.genecards.org/cgi-bin/carddisp.pl?gene=HSALNG0113292</a>         |
| HSALNG0113293     |                                                                 | RNA Gene       | 3  | GC16M086387 | 2.232967854 | <a href="https://www.genecards.org/cgi-bin/carddisp.pl?gene=HSALNG0113293">https://www.genecards.org/cgi-bin/carddisp.pl?gene=HSALNG0113293</a>         |
| NONHSAG013110.2   |                                                                 | RNA Gene       | 3  | GC13P028704 | 2.232967854 | <a href="https://www.genecards.org/cgi-bin/carddisp.pl?gene=NONHSAG013110.2">https://www.genecards.org/cgi-bin/carddisp.pl?gene=NONHSAG013110.2</a>     |
| lnc-SLC22A18-7    |                                                                 | RNA Gene       | 3  | GC11P003146 | 2.232967854 | <a href="https://www.genecards.org/cgi-bin/carddisp.pl?gene=lnc-SLC22A18-7">https://www.genecards.org/cgi-bin/carddisp.pl?gene=lnc-SLC22A18-7</a>       |
| HSALNG0071704     |                                                                 | RNA Gene       | 3  | GC09M068734 | 2.232967854 | <a href="https://www.genecards.org/cgi-bin/carddisp.pl?gene=HSALNG0071704">https://www.genecards.org/cgi-bin/carddisp.pl?gene=HSALNG0071704</a>         |
| hsa-miR-5096-076  |                                                                 | RNA Gene       | 3  | GC07M004224 | 2.232967854 | <a href="https://www.genecards.org/cgi-bin/carddisp.pl?gene=hsa-miR-5096-076">https://www.genecards.org/cgi-bin/carddisp.pl?gene=hsa-miR-5096-076</a>   |
| lnc-KLHL24-6      |                                                                 | RNA Gene       | 3  | GC03P183484 | 2.232967854 | <a href="https://www.genecards.org/cgi-bin/carddisp.pl?gene=lnc-KLHL24-6">https://www.genecards.org/cgi-bin/carddisp.pl?gene=lnc-KLHL24-6</a>           |
| piR-50443-100     |                                                                 | RNA Gene       | 3  | GC13P046157 | 2.232967854 | <a href="https://www.genecards.org/cgi-bin/carddisp.pl?gene=piR-50443-100">https://www.genecards.org/cgi-bin/carddisp.pl?gene=piR-50443-100</a>         |
| piR-61101-044     |                                                                 | RNA Gene       | 3  | GC10M015274 | 2.232967854 | <a href="https://www.genecards.org/cgi-bin/carddisp.pl?gene=piR-61101-044">https://www.genecards.org/cgi-bin/carddisp.pl?gene=piR-61101-044</a>         |
| ENSG00000280306   |                                                                 | Uncategorized  | 2  | GC16P020487 | 2.232967854 | <a href="https://www.genecards.org/cgi-bin/carddisp.pl?gene=ENSG00000280306">https://www.genecards.org/cgi-bin/carddisp.pl?gene=ENSG00000280306</a>     |
| ENSG00000285529   |                                                                 | RNA Gene       | 2  | GC10P130525 | 2.232967854 | <a href="https://www.genecards.org/cgi-bin/carddisp.pl?gene=ENSG00000285529">https://www.genecards.org/cgi-bin/carddisp.pl?gene=ENSG00000285529</a>     |
| ENSG00000258506   |                                                                 | Pseudogene     | 2  | GC14P084951 | 2.232967854 | <a href="https://www.genecards.org/cgi-bin/carddisp.pl?gene=ENSG00000258506">https://www.genecards.org/cgi-bin/carddisp.pl?gene=ENSG00000258506</a>     |
| ENSG00000271078   |                                                                 | Pseudogene     | 2  | GC15M032251 | 2.232967854 | <a href="https://www.genecards.org/cgi-bin/carddisp.pl?gene=ENSG00000271078">https://www.genecards.org/cgi-bin/carddisp.pl?gene=ENSG00000271078</a>     |
| HSALNG0011461     |                                                                 | RNA Gene       | 2  | GC01M231809 | 2.232967854 | <a href="https://www.genecards.org/cgi-bin/carddisp.pl?gene=HSALNG0011461">https://www.genecards.org/cgi-bin/carddisp.pl?gene=HSALNG0011461</a>         |
| LOC105376433      | Uncharacterized LOC105376433                                    | RNA Gene       | 2  | GC10P015236 | 2.232967854 | <a href="https://www.genecards.org/cgi-bin/carddisp.pl?gene=LOC105376433">https://www.genecards.org/cgi-bin/carddisp.pl?gene=LOC105376433</a>           |
| LOC107986000      | Uncharacterized LOC107986000                                    | RNA Gene       | 2  | GC02P235730 | 2.232967854 | <a href="https://www.genecards.org/cgi-bin/carddisp.pl?gene=LOC107986000">https://www.genecards.org/cgi-bin/carddisp.pl?gene=LOC107986000</a>           |
| lnc-RASGRP1-1     |                                                                 | RNA Gene       | 2  | GC15M038754 | 2.232967854 | <a href="https://www.genecards.org/cgi-bin/carddisp.pl?gene=lnc-RASGRP1-1">https://www.genecards.org/cgi-bin/carddisp.pl?gene=lnc-RASGRP1-1</a>         |
| HSALNG0032698     |                                                                 | RNA Gene       | 2  | GC04P007752 | 2.232967854 | <a href="https://www.genecards.org/cgi-bin/carddisp.pl?gene=HSALNG0032698">https://www.genecards.org/cgi-bin/carddisp.pl?gene=HSALNG0032698</a>         |
| HSALNG0043115     |                                                                 | RNA Gene       | 2  | GC05M082908 | 2.232967854 | <a href="https://www.genecards.org/cgi-bin/carddisp.pl?gene=HSALNG0043115">https://www.genecards.org/cgi-bin/carddisp.pl?gene=HSALNG0043115</a>         |
| HSALNG0043127     |                                                                 | RNA Gene       | 2  | GC05P083011 | 2.232967854 | <a href="https://www.genecards.org/cgi-bin/carddisp.pl?gene=HSALNG0043127">https://www.genecards.org/cgi-bin/carddisp.pl?gene=HSALNG0043127</a>         |
| HSALNG0014027     |                                                                 | RNA Gene       | 2  | GC02M031425 | 2.232967854 | <a href="https://www.genecards.org/cgi-bin/carddisp.pl?gene=HSALNG0014027">https://www.genecards.org/cgi-bin/carddisp.pl?gene=HSALNG0014027</a>         |
| HSALNG0010758     |                                                                 | RNA Gene       | 2  | GC01P220796 | 2.232967854 | <a href="https://www.genecards.org/cgi-bin/carddisp.pl?gene=HSALNG0010758">https://www.genecards.org/cgi-bin/carddisp.pl?gene=HSALNG0010758</a>         |
| HSALNG0031159     |                                                                 | RNA Gene       | 2  | GC03P183480 | 2.232967854 | <a href="https://www.genecards.org/cgi-bin/carddisp.pl?gene=HSALNG0031159">https://www.genecards.org/cgi-bin/carddisp.pl?gene=HSALNG0031159</a>         |
| HSALNG0032696     |                                                                 | RNA Gene       | 2  | GC04M007742 | 2.232967854 | <a href="https://www.genecards.org/cgi-bin/carddisp.pl?gene=HSALNG0032696">https://www.genecards.org/cgi-bin/carddisp.pl?gene=HSALNG0032696</a>         |
| HSALNG0056551     |                                                                 | RNA Gene       | 2  | GC07M021497 | 2.232967854 | <a href="https://www.genecards.org/cgi-bin/carddisp.pl?gene=HSALNG0056551">https://www.genecards.org/cgi-bin/carddisp.pl?gene=HSALNG0056551</a>         |
| HSALNG0061543     |                                                                 | RNA Gene       | 2  | GC07P135291 | 2.232967854 | <a href="https://www.genecards.org/cgi-bin/carddisp.pl?gene=HSALNG0061543">https://www.genecards.org/cgi-bin/carddisp.pl?gene=HSALNG0061543</a>         |
| NONHSAG018421.2   |                                                                 | RNA Gene       | 2  | GC16P005964 | 2.232967854 | <a href="https://www.genecards.org/cgi-bin/carddisp.pl?gene=NONHSAG018421.2">https://www.genecards.org/cgi-bin/carddisp.pl?gene=NONHSAG018421.2</a>     |
| piR-43105-110     |                                                                 | RNA Gene       | 2  | GC12P031998 | 2.232967854 | <a href="https://www.genecards.org/cgi-bin/carddisp.pl?gene=piR-43105-110">https://www.genecards.org/cgi-bin/carddisp.pl?gene=piR-43105-110</a>         |
| piR-48799-012     |                                                                 | RNA Gene       | 2  | GC10P015269 | 2.232967854 | <a href="https://www.genecards.org/cgi-bin/carddisp.pl?gene=piR-48799-012">https://www.genecards.org/cgi-bin/carddisp.pl?gene=piR-48799-012</a>         |
| RF00017-1289      |                                                                 | RNA Gene       | 2  | GC13P046130 | 2.232967854 | <a href="https://www.genecards.org/cgi-bin/carddisp.pl?gene=RF00017-1289">https://www.genecards.org/cgi-bin/carddisp.pl?gene=RF00017-1289</a>           |
| piR-55036-040     |                                                                 | RNA Gene       | 2  | GC02P031489 | 2.232967854 | <a href="https://www.genecards.org/cgi-bin/carddisp.pl?gene=piR-55036-040">https://www.genecards.org/cgi-bin/carddisp.pl?gene=piR-55036-040</a>         |
| lnc-MARC2-2       |                                                                 | RNA Gene       | 2  | GC01P220804 | 2.232967854 | <a href="https://www.genecards.org/cgi-bin/carddisp.pl?gene=lnc-MARC2-2">https://www.genecards.org/cgi-bin/carddisp.pl?gene=lnc-MARC2-2</a>             |
| piR-31534-137     |                                                                 | RNA Gene       | 2  | GC13M028707 | 2.232967854 | <a href="https://www.genecards.org/cgi-bin/carddisp.pl?gene=piR-31534-137">https://www.genecards.org/cgi-bin/carddisp.pl?gene=piR-31534-137</a>         |
| piR-39858-368     |                                                                 | RNA Gene       | 2  | GC20M016549 | 2.232967854 | <a href="https://www.genecards.org/cgi-bin/carddisp.pl?gene=piR-39858-368">https://www.genecards.org/cgi-bin/carddisp.pl?gene=piR-39858-368</a>         |
| piR-43106-189     |                                                                 | RNA Gene       | 2  | GC07P135282 | 2.232967854 | <a href="https://www.genecards.org/cgi-bin/carddisp.pl?gene=piR-43106-189">https://www.genecards.org/cgi-bin/carddisp.pl?gene=piR-43106-189</a>         |
| LOC107984123      | Uncharacterized LOC107984123                                    | RNA Gene       | 1  | GC07M135264 | 2.232967854 | <a href="https://www.genecards.org/cgi-bin/carddisp.pl?gene=LOC107984123">https://www.genecards.org/cgi-bin/carddisp.pl?gene=LOC107984123</a>           |
| LOC105377705      | Uncharacterized LOC105377705                                    | RNA Gene       | 1  | GC05M166230 | 2.232967854 | <a href="https://www.genecards.org/cgi-bin/carddisp.pl?gene=LOC105377705">https://www.genecards.org/cgi-bin/carddisp.pl?gene=LOC105377705</a>           |
| ENSG00000219736   |                                                                 | Pseudogene     | 1  | GC06M074850 | 2.232967854 | <a href="https://www.genecards.org/cgi-bin/carddisp.pl?gene=ENSG00000219736">https://www.genecards.org/cgi-bin/carddisp.pl?gene=ENSG00000219736</a>     |
| ENSG00000229119   |                                                                 | Pseudogene     | 1  | GC05P166383 | 2.232967854 | <a href="https://www.genecards.org/cgi-bin/carddisp.pl?gene=ENSG00000229119">https://www.genecards.org/cgi-bin/carddisp.pl?gene=ENSG00000229119</a>     |
| ENSG00000220748   |                                                                 | Pseudogene     | 1  | GC06P023972 | 2.232967854 | <a href="https://www.genecards.org/cgi-bin/carddisp.pl?gene=ENSG00000220748">https://www.genecards.org/cgi-bin/carddisp.pl?gene=ENSG00000220748</a>     |
| LOC102724253      | Uncharacterized LOC102724253                                    | RNA Gene       | 1  | GC15M038755 | 2.232967854 | <a href="https://www.genecards.org/cgi-bin/carddisp.pl?gene=LOC102724253">https://www.genecards.org/cgi-bin/carddisp.pl?gene=LOC102724253</a>           |
| RF00026-272       |                                                                 | RNA Gene       | 1  | GC13M028705 | 2.232967854 | <a href="https://www.genecards.org/cgi-bin/carddisp.pl?gene=RF00026-272">https://www.genecards.org/cgi-bin/carddisp.pl?gene=RF00026-272</a>             |
| HSALNG0105127-003 |                                                                 | RNA Gene       | 1  | GC15P038755 | 2.232967854 | <a href="https://www.genecards.org/cgi-bin/carddisp.pl?gene=HSALNG0105127-003">https://www.genecards.org/cgi-bin/carddisp.pl?gene=HSALNG0105127-003</a> |
| HSP90AA2P         | Heat Shock Protein 90 Alpha Family Class A Member 2, Pseudogene | Pseudogene     | 19 | GC11M027888 | 2.202373981 | <a href="https://www.genecards.org/cgi-bin/carddisp.pl?gene=HSP90AA2P">https://www.genecards.org/cgi-bin/carddisp.pl?gene=HSP90AA2P</a>                 |
| DUSP14            | Dual Specificity Phosphatase 14                                 | Protein Coding | 38 | GC17P037489 | 2.19440794  | <a href="https://www.genecards.org/cgi-bin/carddisp.pl?gene=DUSP14">https://www.genecards.org/cgi-bin/carddisp.pl?gene=DUSP14</a>                       |
| ZC3H12A           | Zinc Finger CCCH-Type Containing 12A                            | Protein Coding | 37 | GC01P037474 | 2.164163351 | <a href="https://www.genecards.org/cgi-bin/carddisp.pl?gene=ZC3H12A">https://www.genecards.org/cgi-bin/carddisp.pl?gene=ZC3H12A</a>                     |
| TSKU              | Tsukushi, Small Leucine Rich                                    | Protein Coding | 34 | GC11P076782 | 2.163715601 | <a href="https://www.genecards.org/cgi-bin/carddisp.pl?gene=TSKU">https://www.genecards.org/cgi-bin/carddisp.pl?gene=TSKU</a>                           |
| TRIM47            | Tripartite Motif Containing 47                                  | Protein Coding | 34 | GC17M075874 | 2.146330357 | <a href="https://www.genecards.org/cgi-bin/carddisp.pl?gene=TRIM47">https://www.genecards.org/cgi-bin/carddisp.pl?gene=TRIM47</a>                       |
| SLC25A48          | Solute Carrier Family 25 Member 48                              | Protein Coding | 32 | GC05P135579 | 2.117699146 | <a href="https://www.genecards.org/cgi-bin/carddisp.pl?gene=SLC25A48">https://www.genecards.org/cgi-bin/carddisp.pl?gene=SLC25A48</a>                   |
| DNAJC11           | DnaJ Heat Shock Protein Family (Hsp40) Member C11               | Protein Coding | 35 | GC01M006634 | 2.115141392 | <a href="https://www.genecards.org/cgi-bin/carddisp.pl?gene=DNAJC11">https://www.genecards.org/cgi-bin/carddisp.pl?gene=DNAJC11</a>                     |
| SNRNP40           | Small Nuclear Ribonucleoprotein U5 Subunit 40                   | Protein Coding | 37 | GC01M031259 | 2.111979246 | <a href="https://www.genecards.org/cgi-bin/carddisp.pl?gene=SNRNP40">https://www.genecards.org/cgi-bin/carddisp.pl?gene=SNRNP40</a>                     |
| YIPF6             | Yip1 Domain Family Member 6                                     | Protein Coding | 34 | GC0XP068498 | 2.097386837 | <a href="https://www.genecards.org/cgi-bin/carddisp.pl?gene=YIPF6">https://www.genecards.org/cgi-bin/carddisp.pl?gene=YIPF6</a>                         |
| RPL17-C18orf32    | RPL17-C18orf32 Readthrough                                      | Protein Coding | 21 | GC18M049481 | 2.043186188 | <a href="https://www.genecards.org/cgi-bin/carddisp.pl?gene=RPL17-C18orf32">https://www.genecards.org/cgi-bin/carddisp.pl?gene=RPL17-C18orf32</a>       |

|              |                                                              |                   |    |             |             |                                                                                                                                               |
|--------------|--------------------------------------------------------------|-------------------|----|-------------|-------------|-----------------------------------------------------------------------------------------------------------------------------------------------|
| LINC00333    | Long Intergenic Non-Protein Coding RNA 333                   | RNA Gene          | 13 | GC13P084140 | 2.035597801 | <a href="https://www.genecards.org/cgi-bin/carddisp.pl?gene=LINC00333">https://www.genecards.org/cgi-bin/carddisp.pl?gene=LINC00333</a>       |
| PDIA2        | Protein Disulfide Isomerase Family A Member 2                | Protein Coding    | 39 | GC16P005498 | 2.022377729 | <a href="https://www.genecards.org/cgi-bin/carddisp.pl?gene=PDIA2">https://www.genecards.org/cgi-bin/carddisp.pl?gene=PDIA2</a>               |
| TXNDC5       | Thioredoxin Domain Containing 5                              | Protein Coding    | 39 | GC06M007893 | 2.007545948 | <a href="https://www.genecards.org/cgi-bin/carddisp.pl?gene=TXNDC5">https://www.genecards.org/cgi-bin/carddisp.pl?gene=TXNDC5</a>             |
| PHLPP2       | PH Domain And Leucine Rich Repeat Protein Phosphatase 2      | Protein Coding    | 41 | GC16M071637 | 2.00033474  | <a href="https://www.genecards.org/cgi-bin/carddisp.pl?gene=PHLPP2">https://www.genecards.org/cgi-bin/carddisp.pl?gene=PHLPP2</a>             |
| LOC109279247 | FGF21/FUT1 Promoter Region                                   | Biological Region | 1  | GC19P048783 | 1.936319113 | <a href="https://www.genecards.org/cgi-bin/carddisp.pl?gene=LOC109279247">https://www.genecards.org/cgi-bin/carddisp.pl?gene=LOC109279247</a> |
| PRMT3        | Protein Arginine Methyltransferase 3                         | Protein Coding    | 43 | GC11P020409 | 1.901653171 | <a href="https://www.genecards.org/cgi-bin/carddisp.pl?gene=PRMT3">https://www.genecards.org/cgi-bin/carddisp.pl?gene=PRMT3</a>               |
| FAM166B      | Family With Sequence Similarity 166 Member B                 | Protein Coding    | 30 | GC09M035554 | 1.870354414 | <a href="https://www.genecards.org/cgi-bin/carddisp.pl?gene=FAM166B">https://www.genecards.org/cgi-bin/carddisp.pl?gene=FAM166B</a>           |
| CR1L         | Complement C3b/C4b Receptor 1 Like                           | Protein Coding    | 34 | GC01P207646 | 1.857897997 | <a href="https://www.genecards.org/cgi-bin/carddisp.pl?gene=CR1L">https://www.genecards.org/cgi-bin/carddisp.pl?gene=CR1L</a>                 |
| SAP18        | Sin3A Associated Protein 18                                  | Protein Coding    | 40 | GC13P021140 | 1.847493052 | <a href="https://www.genecards.org/cgi-bin/carddisp.pl?gene=SAP18">https://www.genecards.org/cgi-bin/carddisp.pl?gene=SAP18</a>               |
| IGKV2D-23    | Immunoglobulin Kappa Variable 2D-23 (Pseudogene)             | Pseudogene        | 5  | GC02P090720 | 1.844097137 | <a href="https://www.genecards.org/cgi-bin/carddisp.pl?gene=IGKV2D-23">https://www.genecards.org/cgi-bin/carddisp.pl?gene=IGKV2D-23</a>       |
| NMBR         | Neuromedin B Receptor                                        | Protein Coding    | 43 | GC06M142059 | 1.779913902 | <a href="https://www.genecards.org/cgi-bin/carddisp.pl?gene=NMBR">https://www.genecards.org/cgi-bin/carddisp.pl?gene=NMBR</a>                 |
| SUCNR1       | Succinate Receptor 1                                         | Protein Coding    | 41 | GC03P151873 | 1.748568058 | <a href="https://www.genecards.org/cgi-bin/carddisp.pl?gene=SUCNR1">https://www.genecards.org/cgi-bin/carddisp.pl?gene=SUCNR1</a>             |
| SGIP1        | SH3GL Interacting Endocytic Adaptor 1                        | Protein Coding    | 35 | GC01P066533 | 1.687782764 | <a href="https://www.genecards.org/cgi-bin/carddisp.pl?gene=SGIP1">https://www.genecards.org/cgi-bin/carddisp.pl?gene=SGIP1</a>               |
| MIR103B2     | MicroRNA 103b-2                                              | RNA Gene          | 9  | GC20M003899 | 1.669028759 | <a href="https://www.genecards.org/cgi-bin/carddisp.pl?gene=MIR103B2">https://www.genecards.org/cgi-bin/carddisp.pl?gene=MIR103B2</a>         |
| MIR103B1     | MicroRNA 103b-1                                              | RNA Gene          | 8  | GC05P168560 | 1.669028759 | <a href="https://www.genecards.org/cgi-bin/carddisp.pl?gene=MIR103B1">https://www.genecards.org/cgi-bin/carddisp.pl?gene=MIR103B1</a>         |
| DNAJC10      | DnaJ Heat Shock Protein Family (Hsp40) Member C10            | Protein Coding    | 38 | GC02P182716 | 1.648108721 | <a href="https://www.genecards.org/cgi-bin/carddisp.pl?gene=DNAJC10">https://www.genecards.org/cgi-bin/carddisp.pl?gene=DNAJC10</a>           |
| HERC4        | HECT And RLD Domain Containing E3 Ubiquitin Protein Ligase 4 | Protein Coding    | 37 | GC10M067921 | 1.544003963 | <a href="https://www.genecards.org/cgi-bin/carddisp.pl?gene=HERC4">https://www.genecards.org/cgi-bin/carddisp.pl?gene=HERC4</a>               |
| FAM174A      | Family With Sequence Similarity 174 Member A                 | Protein Coding    | 32 | GC05P100535 | 1.195732713 | <a href="https://www.genecards.org/cgi-bin/carddisp.pl?gene=FAM174A">https://www.genecards.org/cgi-bin/carddisp.pl?gene=FAM174A</a>           |
| MIR3666      | MicroRNA 3666                                                | RNA Gene          | 11 | GC07P114653 | 0.87816745  | <a href="https://www.genecards.org/cgi-bin/carddisp.pl?gene=MIR3666">https://www.genecards.org/cgi-bin/carddisp.pl?gene=MIR3666</a>           |
| MIR4668      | MicroRNA 4668                                                | RNA Gene          | 12 | GC09P111932 | 0.84098649  | <a href="https://www.genecards.org/cgi-bin/carddisp.pl?gene=MIR4668">https://www.genecards.org/cgi-bin/carddisp.pl?gene=MIR4668</a>           |
| TM6SF1       | Transmembrane 6 Superfamily Member 1                         | Protein Coding    | 33 | GC15P083357 | 0.515707552 | <a href="https://www.genecards.org/cgi-bin/carddisp.pl?gene=TM6SF1">https://www.genecards.org/cgi-bin/carddisp.pl?gene=TM6SF1</a>             |
|              |                                                              |                   |    |             |             |                                                                                                                                               |
