# Supplementary material for: Explore the Mechanism of Astragalus mongholicus Bunge against Nonalcoholic Fatty Liver Disease Based on Network Pharmacology and Experimental Verification
Source: Hindawi journal article supplement (doi:10.1155/2022/4745042), 2022-04-05
Supplement: f1 [file 4745042.f1.zip]

| Category         | Term                                                                 | Count | %          | PValue   | Genes                                                                                                                                                                                                                           | List Total | Pop Hits | Pop Total | Fold Enrichment | Bonferroni | Benjamini | FDR      |
|------------------|----------------------------------------------------------------------|-------|------------|----------|---------------------------------------------------------------------------------------------------------------------------------------------------------------------------------------------------------------------------------|------------|----------|-----------|-----------------|------------|-----------|----------|
| GOTERM_BP_DIRECT | response to drug                                                     | 24    | 24.4897959 | 1.18E-19 | CDKN1A, JUN, HSP90AA1, TGFB1, CHUK, STAT1, PTEN, FOS, HTR2A, PTGS2, SLC6A3, RELA, SLC6A4, ICAM1, SOD1, IL6, IFNG, CCND1, MYC, CASP3, CYP1A1, BCL2, PPARG, DRD1                                                                  | 98         | 304      | 16792     | 13.52739        | 2.23E-16   | 2.23E-16  | 1.96E-16 |
| GOTERM_BP_DIRECT | aging                                                                | 18    | 18.3673469 | 5.92E-17 | NQO1, JUN, TGFB1, VCAM1, PTEN, FOS, HTR2A, MPO, SLC6A3, RELA, SOD1, CASP9, COL3A1, IL6, CYP1A1, CCL2, AKT1, NFE2L2                                                                                                              | 98         | 165      | 16792     | 18.692393       | 2.10E-13   | 5.61E-14  | 4.93E-14 |
| GOTERM_BP_DIRECT | positive regulation of transcription from RNA polymerase II promoter | 33    | 33.6734694 | 2.08E-16 | GSK3B, NR1H3, NR1H2, SERPINE1, AHR, ADRB2, ELK1, TNF, RELA, EGFR, IKBKB, PPP3CA, RXRA, MYC, AKT1, JUN, TGFB1, CHUK, STAT1, FOS, MAPK14, ESR1, SIRT1, IL1A, CXCL10, IL6, IFNG, IRF1, IL1B, PPARG, PPARA, TP53, NFE2L2            | 98         | 981      | 16792     | 5.7639643       | 4.21E-13   | 1.32E-13  | 1.16E-13 |
| GOTERM_BP_DIRECT | positive regulation of nitric oxide biosynthetic process             | 12    | 12.244898  | 6.49E-16 | IL6, HSP90AA1, IFNG, IL1B, INSR, AKT1, OPRM1, PTGS2, ESR1, TNF, EGFR, ICAM1                                                                                                                                                     | 98         | 43       | 16792     | 47.81775        | 1.26E-12   | 3.08E-13  | 2.70E-13 |
| GOTERM_BP_DIRECT | response to lipopolysaccharide                                       | 15    | 15.3061224 | 5.69E-13 | JUN, VCAM1, CHUK, FOS, OPRM1, PTGS2, MPO, SELE, CASP9, CXCL10, THBD, CXCL11, CASP8, CASP3, NQO1, GSK3B, CDKN1A, HSPA5, PTEN, HSPB1, MPO, SIRT1, MMP9, EGFR, RELA, IKBKB, IL6, MAPK8, MYC, CASP3, BCL2, BIRC5, AKT1, TP53, PPARG | 98         | 164      | 16792     | 15.671976       | 1.08E-09   | 2.16E-10  | 1.90E-10 |
| GOTERM_BP_DIRECT | negative regulation of apoptotic process                             | 21    | 21.4285714 | 1.20E-12 | CRP, TGFB1, CAV1, NR1H2, MAPK14, TNF, SLC6A4, IL1A, IL6, MAPK8, IFNG, MYC, IL1B, LDLR, TP53, NFE2L2, PPARG                                                                                                                      | 98         | 262      | 16792     | 11.117931       | 3.80E-09   | 4.97E-10  | 4.37E-10 |
| GOTERM_BP_DIRECT | cellular response to lipopolysaccharide                              | 13    | 13.2653061 | 2.10E-12 | CXCL8, NOS2, SERPINE1, MAPK14, TNF, RELA, ICAM1, CXCL10, IL6, MAPK8, IFNG, CCL2, PPARG                                                                                                                                          | 98         | 113      | 16792     | 19.71248        | 3.98E-09   | 4.97E-10  | 4.37E-10 |
| GOTERM_BP_DIRECT | inflammatory response                                                | 19    | 19.3877551 | 5.11E-12 | CRP, TGFB1, CXCL8, CHUK, FOS, PTGS2, SELE, TNF, RELA, IKBKB, IL1A, CXCL10, CXCL11, IL6, IL1B, SPP1, CCL2, AKT1, NFE2L2                                                                                                          | 98         | 379      | 16792     | 8.5899521       | 9.68E-09   | 1.08E-09  | 9.45E-10 |
| GOTERM_BP_DIRECT | cellular response to hypoxia                                         | 12    | 12.244898  | 7.86E-12 | OPRD1, PTEN, BCL2, HMOX1, AKT1, SLC2A4, PTGS2, SIRT1, TP53, ICAM1, PPARG, NFE2L2                                                                                                                                                | 98         | 96       | 16792     | 21.418367       | 1.49E-08   | 1.49E-09  | 1.31E-09 |
| GOTERM_BP_DIRECT | response to antibiotic                                               | 9     | 9.18367347 | 8.67E-12 | CASP9, IL6, HSP90AA1, CASP8, CASP3, CYP1A1, CCL2, TP53, SOD1                                                                                                                                                                    | 98         | 32       | 16792     | 48.191327       | 1.64E-08   | 1.49E-09  | 1.31E-09 |
| GOTERM_BP_DIRECT | cellular response to organic cyclic compound                         | 10    | 10.2040816 | 4.86E-11 | TGFB1, CASP8, STAT1, IL1B, CASP3, CYP1A1, CYP1B1, CCL2, AKT1, TNF                                                                                                                                                               | 98         | 59       | 16792     | 29.041854       | 9.20E-08   | 7.67E-09  | 6.74E-09 |
| GOTERM_BP_DIRECT | positive regulation of transcription, DNA-templated                  | 20    | 20.4081633 | 9.67E-11 | JUN, TGFB1, STAT1, INSR, NR1H2, AHR, FOS, ELK1, ESR1, TNF, RELA, IKBKB, IL6, MYC, IL1B, IRF1, PPARG, PPARA, TP53, PPARG                                                                                                         | 98         | 515      | 16792     | 6.65425         | 1.83E-07   | 1.41E-08  | 1.24E-08 |
| GOTERM_BP_DIRECT | response to estradiol                                                | 11    | 11.2244898 | 1.13E-10 | CASP9, NQO1, TGFB1, CASP8, CCND1, MYC, CASP3, PTEN, PTGS2, ESR1, SLC6A4                                                                                                                                                         | 98         | 91       | 16792     | 20.712267       | 2.13E-07   | 1.52E-08  | 1.34E-08 |
| GOTERM_BP_DIRECT | response to hypoxia                                                  | 13    | 13.2653061 | 3.04E-10 | TGFB1, VCAM1, NOS2, CAV1, MMP2, SLC6A4, DPP4, PLAU, CASP3, CYP1A1, CCL2, HMOX1, PPARA                                                                                                                                           | 98         | 172      | 16792     | 12.950641       | 5.76E-07   | 3.84E-08  | 3.38E-08 |
| GOTERM_BP_DIRECT | response to ethanol                                                  | 11    | 11.2244898 | 4.73E-10 | NQO1, VCAM1, CASP8, CCND1, MYC, PTEN, CCL2, SLC2A4, SLC6A3, ICAM1, SOD1                                                                                                                                                         | 98         | 105      | 16792     | 17.950632       | 8.96E-07   | 5.60E-08  | 4.92E-08 |
| GOTERM_BP_DIRECT | cellular response to tumor necrosis factor                           | 11    | 11.2244898 | 7.50E-10 | IKKB, IL6, VCAM1, CXCL8, CHUK, CCL2, SLC2A4, SIRT1, RELA, ICAM1, NFE2L2                                                                                                                                                         | 98         | 110      | 16792     | 17.134694       | 1.42E-06   | 8.37E-08  | 7.35E-08 |
| GOTERM_BP_DIRECT | positive regulation of angiogenesis                                  | 11    | 11.2244898 | 1.16E-09 | IL1A, CXCL8, IL1B, SERPINE1, HSPB1, CYP1B1, HMOX1, PRKCA, SIRT1, F3, NFE2L2                                                                                                                                                     | 98         | 115      | 16792     | 16.389707       | 2.21E-06   | 1.23E-07  | 1.08E-07 |
| GOTERM_BP_DIRECT | response to cold                                                     | 8     | 8.16326531 | 1.25E-09 | CXCL10, IL6, HSP90AA1, CASP8, ADRB1, PPARG, FOS, ADRB2                                                                                                                                                                          | 98         | 36       | 16792     | 38.077098       | 2.38E-06   | 1.25E-07  | 1.10E-07 |
| GOTERM_BP_DIRECT | response to toxic substance                                          | 10    | 10.2040816 | 1.41E-09 | NQO1, CDKN1A, CHUK, PON1, BCL2, BAX, CYP1B1, FOS, AHR, SLC6A4                                                                                                                                                                   | 98         | 85       | 16792     | 20.158463       | 2.67E-06   | 1.33E-07  | 1.17E-07 |

|                  |                                                            |    |            |          |                                                                                                                                     |    |     |       |           |           |          |          |
|------------------|------------------------------------------------------------|----|------------|----------|-------------------------------------------------------------------------------------------------------------------------------------|----|-----|-------|-----------|-----------|----------|----------|
| GOTERM_BP_DIRECT | positive regulation of smooth muscle cell proliferation    | 9  | 9.18367347 | 1.85E-09 | IL6, JUN, STAT1, MYC, HMOX1, AKT1, PTGS2, TNF, EGFR                                                                                 | 98 | 60  | 16792 | 25.702041 | 3.50E-06  | 1.67E-07 | 1.47E-07 |
| GOTERM_BP_DIRECT | embryo implantation                                        | 8  | 8.16326531 | 3.94E-09 | RXRA, IL1B, MMP2, SPP1, PTGS2, MMP9, SOD1, JUN, CXCL8, CAV1, MMP2, SERPINE1, PTEN, PRKCA, PTGS2, MAPK14, SIRT1, CYP1B1, CCL2, HMOX1 | 98 | 42  | 16792 | 32.637512 | 7.47E-06  | 3.39E-07 | 2.98E-07 |
| GOTERM_BP_DIRECT | angiogenesis                                               | 13 | 13.2653061 | 5.91E-09 | OPRD1, CDKN1A, TGFB1, IFNG, NOS2, AKT1, ESR1, SIRT1, TNF, XDH, LDLR                                                                 | 98 | 223 | 16792 | 9.988835  | 1.12E-05  | 4.87E-07 | 4.28E-07 |
| GOTERM_BP_DIRECT | negative regulation of gene expression                     | 11 | 11.2244898 | 6.46E-09 | CASP9, IL1A, GSK3B, IL1B, CASP3, BCL2, BAX                                                                                          | 98 | 137 | 16792 | 13.757783 | 1.22E-05  | 5.10E-07 | 4.48E-07 |
| GOTERM_BP_DIRECT | extrinsic apoptotic signaling pathway in absence of ligand | 7  | 7.14285714 | 3.75E-08 | TGFB1, CCND1, IL1B, INSR, AKT1, F2, SIRT1, TNF, MMP9, EGFR                                                                          | 98 | 34  | 16792 | 35.277311 | 7.11E-05  | 2.84E-06 | 2.50E-06 |
| GOTERM_BP_DIRECT | positive regulation of protein                             | 10 | 10.2040816 | 4.96E-08 | TGFB1, HSPB1, AKT1, PRKCA, MAPK14, NFE2L2                                                                                           | 98 | 127 | 16792 | 13.491885 | 9.41E-05  | 3.62E-06 | 3.18E-06 |
| GOTERM_BP_DIRECT | positive regulation of blood vessel endothelial cell       | 6  | 6.12244898 | 6.32E-08 | IL6, JUN, TGFB1, PTEN, CCL2, PRKCA, HTR2A, OPRM1, TNF, EGFR, ICAM1                                                                  | 98 | 19  | 16792 | 54.10956  | 1.20E-04  | 4.44E-06 | 3.90E-06 |
| GOTERM_BP_DIRECT | positive regulation of ERK1 and ERK2 cascade               | 11 | 11.2244898 | 6.72E-08 | PPP3CA, NOS2, MYC, IL1B, CCL2, TP53, EGFR, NFE2L2                                                                                   | 98 | 175 | 16792 | 10.770379 | 1.27E-04  | 4.55E-06 | 4.00E-06 |
| GOTERM_BP_DIRECT | cellular response to drug                                  | 8  | 8.16326531 | 1.39E-07 | STAT1, IGFBP3, PTEN, AHR, MAPK14, CASP9, IL1A, CASP8, IFNG, IL1B, CASP3, IRF1, BCL2, BAX, BIRC5, TP53, PPARD                        | 98 | 69  | 16792 | 19.866312 | 2.63E-04  | 9.07E-06 | 7.98E-06 |
| GOTERM_BP_DIRECT | apoptotic process                                          | 17 | 17.3469388 | 1.46E-07 | OPRD1, GSK3B, IL6, TGFB1, CAV1, BCL2, AKT1, TNF                                                                                     | 98 | 567 | 16792 | 5.1373862 | 2.76E-04  | 9.21E-06 | 8.10E-06 |
| GOTERM_BP_DIRECT | positive regulation of peptidyl-serine phosphorylation     | 8  | 8.16326531 | 1.54E-07 | TGFB1, IGFBP3, PTGS2, SIRT1, TNF, SOD1, IL6, MAPK8, BAX, CYP1B1, AKT1, HMOX1, TP53                                                  | 98 | 70  | 16792 | 19.582507 | 2.91E-04  | 9.25E-06 | 8.13E-06 |
| GOTERM_BP_DIRECT | positive regulation of apoptotic process                   | 13 | 13.2653061 | 1.56E-07 | MAPK8, TGFB1, CASP8, IL1B, IRF1, AKT1, PTGS2, EGFR                                                                                  | 98 | 300 | 16792 | 7.425034  | 2.96E-04  | 9.25E-06 | 8.13E-06 |
| GOTERM_BP_DIRECT | cellular response to mechanical stimulus                   | 8  | 8.16326531 | 1.70E-07 | CDKN1A, JUN, TGFB1, CXCL8, IGFBP3, PTEN, OPRM1, PTGS2, IL1A, IL6, IL1B, IRF1, CYP1B1, TP53                                          | 98 | 71  | 16792 | 19.306697 | 3.21E-04  | 9.73E-06 | 8.56E-06 |
| GOTERM_BP_DIRECT | negative regulation of cell proliferation                  | 14 | 14.2857143 | 4.45E-07 | TGFB1, INSR, PTEN, HTR2A, F2, SIRT1, EGFR, RELA, DPP4, CXCL10, IL6, IFNG, MYC, BCL2, BIRC5                                          | 98 | 396 | 16792 | 6.0577201 | 8.43E-04  | 2.44E-05 | 2.15E-05 |
| GOTERM_BP_DIRECT | positive regulation of cell proliferation                  | 15 | 15.3061224 | 4.51E-07 | JUN, STAT1, CASP3, BCL2, HMOX1, SIRT1, SOD1                                                                                         | 98 | 466 | 16792 | 23.518207 | 8.79E-04  | 2.44E-05 | 2.15E-05 |
| GOTERM_BP_DIRECT | response to hydrogen peroxide                              | 7  | 7.14285714 | 4.64E-07 | CDKN1A, F2, MAPK14, TP53, XDH, NFE2L2                                                                                               | 98 | 51  | 16792 | 34.269388 | 0.0013951 | 3.77E-05 | 3.32E-05 |
| GOTERM_BP_DIRECT | positive regulation of reactive oxygen species metabolic   | 6  | 6.12244898 | 7.37E-07 | IL6, CHUK, CASP3, CCL2, RELA, ICAM1                                                                                                 | 98 | 30  | 16792 | 33.163924 | 0.0016556 | 4.25E-05 | 3.74E-05 |
| GOTERM_BP_DIRECT | response to amino acid                                     | 6  | 6.12244898 | 8.74E-07 | CXCL10, MYC, BCL2, BAX, CCL2, TP53                                                                                                  | 98 | 31  | 16792 | 33.163924 | 0.0016556 | 4.25E-05 | 3.74E-05 |
| GOTERM_BP_DIRECT | response to gamma radiation                                | 6  | 6.12244898 | 8.74E-07 | RXRA, NR1I3, NR1I2, PPARG, PPARA, ESR1, PPARD                                                                                       | 98 | 57  | 16792 | 21.042607 | 0.0017215 | 4.31E-05 | 3.79E-05 |
| GOTERM_BP_DIRECT | steroid hormone mediated signaling pathway                 | 7  | 7.14285714 | 9.09E-07 | CAV1, AKT1, HTR2A, PTGS2, EGFR, ICAM1                                                                                               | 98 | 32  | 16792 | 32.127551 | 0.001953  | 4.65E-05 | 4.09E-05 |
| GOTERM_BP_DIRECT | positive regulation of vasoconstriction                    | 6  | 6.12244898 | 1.03E-06 | TGFB1, IL1B, CCL2, AKT1, MAPK14, TNF                                                                                                | 98 | 32  | 16792 | 32.127551 | 0.001953  | 4.65E-05 | 4.09E-05 |
| GOTERM_BP_DIRECT | lipopolysaccharide-mediated signaling pathway              | 6  | 6.12244898 | 1.03E-06 | TGFB1, IL1B, PTEN, CCL2, AKT1, TNF                                                                                                  | 98 | 33  | 16792 | 31.153989 | 0.0022909 | 5.33E-05 | 4.69E-05 |
| GOTERM_BP_DIRECT | protein kinase B signaling                                 | 6  | 6.12244898 | 1.21E-06 |                                                                                                                                     |    |     |       |           |           |          |          |

|                  |                                                                                  |   |            |          |                                                 |    |     |       |           |           |          |          |
|------------------|----------------------------------------------------------------------------------|---|------------|----------|-------------------------------------------------|----|-----|-------|-----------|-----------|----------|----------|
| GOTERM_BP_DIRECT | positive regulation of sequence-specific DNA binding transcription factor        | 8 | 8.16326531 | 2.47E-06 | PPP3CA, IL6, IL1B, PTEN, AKT1, PPARG, ESR1, TNF | 98 | 105 | 16792 | 13.055005 | 0.0046762 | 1.07E-04 | 9.37E-05 |
| GOTERM_BP_DIRECT | positive regulation of neuron apoptotic process                                  | 6 | 6.12244898 | 4.69E-06 | CASP9, NQO1, JUN, CASP3, BAX, TP53              | 98 | 43  | 16792 | 23.908875 | 0.0088475 | 1.97E-04 | 1.74E-04 |
| GOTERM_BP_DIRECT | cellular response to insulin stimulus                                            | 7 | 7.14285714 | 5.41E-06 | STAT1, MYC, INSR, CCL2, AKT1, PPARG, SLC2A4     | 98 | 77  | 16792 | 15.576994 | 0.0102063 | 2.23E-04 | 1.96E-04 |
| GOTERM_BP_DIRECT | response to cAMP                                                                 | 6 | 6.12244898 | 6.59E-06 | THBD, JUN, STAT1, FOS, RELA, SLC6A3             | 98 | 46  | 16792 | 22.349601 | 0.0124055 | 2.66E-04 | 2.34E-04 |
| GOTERM_BP_DIRECT | wound healing                                                                    | 7 | 7.14285714 | 6.77E-06 | COL3A1, IL6, CASP3, OPRM1, PPARA, EGFR, PPARG   | 98 | 80  | 16792 | 14.992857 | 0.0127406 | 2.67E-04 | 2.35E-04 |
| GOTERM_BP_DIRECT | response to X-ray                                                                | 5 | 5.10204082 | 7.07E-06 | THBD, CDKN1A, CCND1, CASP3, TP53                | 98 | 22  | 16792 | 38.942486 | 0.0133009 | 2.73E-04 | 2.40E-04 |
| GOTERM_BP_DIRECT | intrinsic apoptotic signaling pathway in response to DNA damage                  | 6 | 6.12244898 | 7.34E-06 | CASP9, BCL2, BAX, HMOX1, SIRT1, TNF             | 98 | 47  | 16792 | 21.874077 | 0.0138093 | 2.78E-04 | 2.45E-04 |
| GOTERM_BP_DIRECT | activation of cysteine-type endopeptidase activity involved in apoptotic process | 7 | 7.14285714 | 8.38E-06 | CASP8, CASP3, BAX, PPARG, TNF, F3, XDH          | 98 | 83  | 16792 | 14.450947 | 0.0157577 | 3.11E-04 | 2.74E-04 |
| GOTERM_BP_DIRECT | positive regulation of NF-kappaB transcription factor activity                   | 8 | 8.16326531 | 1.19E-05 | IKBKB, IL6, TGFB1, CHUK, IL1B, TNF, RELA, ICAM1 | 98 | 133 | 16792 | 10.306583 | 0.0222155 | 4.23E-04 | 3.72E-04 |
| GOTERM_BP_DIRECT | regulation of sequence-specific DNA binding transcription factor                 | 5 | 5.10204082 | 1.21E-05 | JUN, MAPK8, HMOX1, FOS, MAPK14                  | 98 | 25  | 16792 | 34.269388 | 0.0225911 | 4.23E-04 | 3.72E-04 |
| GOTERM_BP_DIRECT | cell aging                                                                       | 5 | 5.10204082 | 1.21E-05 | BCL2, SIRT1, TP53, ICAM1, SOD1                  | 98 | 25  | 16792 | 34.269388 | 0.0225911 | 4.23E-04 | 3.72E-04 |
| GOTERM_BP_DIRECT | regulation of nitric-oxide synthase activity                                     | 5 | 5.10204082 | 1.42E-05 | HSP90AA1, IL1B, CAV1, AKT1, EGFR                | 98 | 26  | 16792 | 32.951334 | 0.0265273 | 4.89E-04 | 4.30E-04 |
| GOTERM_BP_DIRECT | positive regulation of fibroblast proliferation                                  | 6 | 6.12244898 | 1.47E-05 | CDKN1A, JUN, TGFB1, MYC, ESR1, EGFR             | 98 | 54  | 16792 | 19.038549 | 0.0273864 | 4.96E-04 | 4.36E-04 |
| GOTERM_BP_DIRECT | positive regulation of superoxide anion generation                               | 4 | 4.08163265 | 1.53E-05 | CRP, TGFB1, EGFR, SOD1                          | 98 | 9   | 16792 | 76.154195 | 0.0285882 | 5.09E-04 | 4.47E-04 |
| GOTERM_BP_DIRECT | positive regulation of release of sequestered calcium ion into                   | 5 | 5.10204082 | 1.66E-05 | CXCL10, CXCL11, BAX, DRD1, F2                   | 98 | 27  | 16792 | 31.730915 | 0.0309333 | 5.33E-04 | 4.68E-04 |
| GOTERM_BP_DIRECT | positive regulation of vascular endothelial growth factor production             | 5 | 5.10204082 | 1.66E-05 | IL1A, TGFB1, IL1B, CYP1B1, PTGS2                | 98 | 27  | 16792 | 31.730915 | 0.0309333 | 5.33E-04 | 4.68E-04 |
| GOTERM_BP_DIRECT | protein import into nucleus, translocation                                       | 5 | 5.10204082 | 1.93E-05 | OPRD1, TGFB1, IFNG, AKT1, TNF                   | 98 | 28  | 16792 | 30.597668 | 0.0358389 | 6.08E-04 | 5.35E-04 |
| GOTERM_BP_DIRECT | positive regulation of chemokine biosynthetic process                            | 4 | 4.08163265 | 2.18E-05 | IFNG, IL1B, HMOX1, TNF                          | 98 | 10  | 16792 | 68.538776 | 0.0404221 | 6.59E-04 | 5.79E-04 |
| GOTERM_BP_DIRECT | cellular response to dexamethasone                                               | 5 | 5.10204082 | 2.22E-05 | CASP9, IL6, TGFB1, CCL2, EGFR                   | 98 | 29  | 16792 | 29.542576 | 0.0412735 | 6.59E-04 | 5.79E-04 |
| GOTERM_BP_DIRECT | liver regeneration                                                               | 5 | 5.10204082 | 2.22E-05 | TGFB1, CCND1, MYC, HMOX1, EGFR                  | 98 | 29  | 16792 | 29.542576 | 0.0412735 | 6.59E-04 | 5.79E-04 |
| GOTERM_BP_DIRECT | negative regulation of smooth muscle cell proliferation                          | 5 | 5.10204082 | 2.22E-05 | IFNG, IGFBP3, HMOX1, PPARG, PPARG               | 98 | 29  | 16792 | 29.542576 | 0.0412735 | 6.59E-04 | 5.79E-04 |
| GOTERM_BP_DIRECT | response to mechanical stimulus                                                  | 6 | 6.12244898 | 2.27E-05 | COL3A1, JUN, STAT1, CCL2, PPARG, MPO            | 98 | 59  | 16792 | 17.425112 | 0.0420582 | 6.61E-04 | 5.81E-04 |

|                  |                                                                                   |    |            |          |                                                                                               |    |     |       |           |           |            |            |
|------------------|-----------------------------------------------------------------------------------|----|------------|----------|-----------------------------------------------------------------------------------------------|----|-----|-------|-----------|-----------|------------|------------|
| GOTERM_BP_DIRECT | cellular response to ionizing radiation                                           | 5  | 5.10204082 | 2.92E-05 | CDKN1A, TGFB1, MAPK14, SIRT1, TP53                                                            | 98 | 31  | 16792 | 27.636603 | 0.0538433 | 8.39E-04   | 7.37E-04   |
| GOTERM_BP_DIRECT | negative regulation of transcription, DNA-templated                               | 13 | 13.2653061 | 2.99E-05 | JUN, TGFB1, NR1I3, NR1I2, AHR, SIRT1, TNF, RELA, IRF1, BIRC5, PPARG, TP53, PPARD              | 98 | 499 | 16792 | 4.4639483 | 0.055097  | 8.46E-04   | 7.44E-04   |
| GOTERM_BP_DIRECT | regulation of apoptotic process                                                   | 9  | 9.18367347 | 3.23E-05 | CASP9, TGFB1, CASP8, STAT1, IGFBP3, BAX, BIRC5, ESR1, TP53                                    | 98 | 213 | 16792 | 7.2400115 | 0.0593307 | 8.99E-04   | 7.91E-04   |
| GOTERM_BP_DIRECT | response to estrogen                                                              | 6  | 6.12244898 | 3.64E-05 | HSP90AA1, CCND1, CAV1, HMOX1, PPARG, ESR1                                                     | 98 | 65  | 16792 | 15.816641 | 0.0666556 | 1.00E-03   | 8.79E-04   |
| GOTERM_BP_DIRECT | positive regulation of cAMP-mediated signaling                                    | 4  | 4.08163265 | 3.96E-05 | CXCL10, CXCL11, ADRB1, OPRM1                                                                  | 98 | 12  | 16792 | 57.115646 | 0.07227   | 0.00105652 | 9.29E-04   |
| GOTERM_BP_DIRECT | PERK-mediated unfolded protein response                                           | 4  | 4.08163265 | 3.96E-05 | CXCL8, HSPA5, CCL2, NFE2L2                                                                    | 98 | 12  | 16792 | 57.115646 | 0.07227   | 0.00105652 | 9.29E-04   |
| GOTERM_BP_DIRECT | positive regulation of endothelial cell proliferation                             | 6  | 6.12244898 | 4.86E-05 | JUN, CCL2, AKT1, PRKCA, SIRT1, F3                                                             | 98 | 69  | 16792 | 14.899734 | 0.0880434 | 0.00128001 | 0.00112533 |
| GOTERM_BP_DIRECT | nitric oxide biosynthetic process                                                 | 4  | 4.08163265 | 5.12E-05 | NQO1, NOS2, CYP1B1, AKT1                                                                      | 98 | 13  | 16792 | 52.722135 | 0.0925445 | 0.00133025 | 0.0011695  |
| GOTERM_BP_DIRECT | apoptotic signaling pathway                                                       | 6  | 6.12244898 | 5.58E-05 | CASP8, CASP3, CAV1, BAX, PRKCA, PPARD                                                         | 98 | 71  | 16792 | 14.480023 | 0.1003992 | 0.00141068 | 0.00124021 |
| GOTERM_BP_DIRECT | cellular response to interleukin-1                                                | 6  | 6.12244898 | 5.58E-05 | IL6, CXCL8, MYC, CCL2, RELA, ICAM1                                                            | 98 | 71  | 16792 | 14.480023 | 0.1003992 | 0.00141068 | 0.00124021 |
| GOTERM_BP_DIRECT | negative regulation of extrinsic apoptotic signaling pathway in absence of ligand | 5  | 5.10204082 | 5.97E-05 | IL1A, IL1B, BCL2, AKT1, TNF                                                                   | 98 | 37  | 16792 | 23.154992 | 0.1069677 | 0.00146921 | 0.00129166 |
| GOTERM_BP_DIRECT | response to nicotine                                                              | 5  | 5.10204082 | 5.97E-05 | VCAM1, CASP3, BCL2, HMOX1, SLC6A3                                                             | 98 | 37  | 16792 | 23.154992 | 0.1069677 | 0.00146921 | 0.00129166 |
| GOTERM_BP_DIRECT | negative regulation of transcription from RNA polymerase II                       | 15 | 15.3061224 | 6.46E-05 | TGFB1, STAT1, CAV1, ESR1, SIRT1, TNF, RELA, RXRA, IFNG, CCND1, MYC, PPARG, PPARG, TP53, PPARD | 98 | 720 | 16792 | 3.5697279 | 0.115166  | 0.00155791 | 0.00136964 |
| GOTERM_BP_DIRECT | negative regulation of oxidative stress-induced intrinsic apoptotic signaling     | 4  | 4.08163265 | 6.49E-05 | HSPB1, AKT1, SIRT1, NFE2L2                                                                    | 98 | 14  | 16792 | 48.956268 | 0.1158058 | 0.00155791 | 0.00136964 |
| GOTERM_BP_DIRECT | response to nutrient                                                              | 6  | 6.12244898 | 6.81E-05 | NQO1, VCAM1, STAT1, PTEN, PPARG, SLC6A4                                                       | 98 | 74  | 16792 | 13.892995 | 0.121141  | 0.00161408 | 0.00141903 |
| GOTERM_BP_DIRECT | negative regulation of cell growth                                                | 7  | 7.14285714 | 7.16E-05 | CDKN1A, TGFB1, BCL2, PPARG, SIRT1, TP53, PPARD                                                | 98 | 121 | 16792 | 9.9126328 | 0.1268215 | 0.0016742  | 0.00147189 |
| GOTERM_BP_DIRECT | circadian rhythm                                                                  | 6  | 6.12244898 | 7.27E-05 | GSK3B, JUN, NOS2, SERPINE1, EGFR, SLC6A4                                                      | 98 | 75  | 16792 | 13.707755 | 0.1286631 | 0.00167953 | 0.00147657 |
| GOTERM_BP_DIRECT | response to progesterone                                                          | 5  | 5.10204082 | 7.37E-05 | TGFB1, CAV1, CCL2, FOS, RELA                                                                  | 98 | 39  | 16792 | 21.967556 | 0.1303405 | 0.00168251 | 0.00147919 |
| GOTERM_BP_DIRECT | leukocyte migration                                                               | 7  | 7.14285714 | 7.49E-05 | THBD, MMP1, CAV1, F2, SELE, MMP9, ICAM1                                                       | 98 | 122 | 16792 | 9.8313817 | 0.1323538 | 0.00169007 | 0.00148584 |
| GOTERM_BP_DIRECT | positive regulation of cell migration                                             | 8  | 8.16326531 | 9.47E-05 | TGFB1, HSPA5, PLAU, INSR, PRKCA, DRD1, F3, EGFR                                               | 98 | 184 | 16792 | 7.4498669 | 0.1643397 | 0.00208626 | 0.00183414 |
| GOTERM_BP_DIRECT | response to UV-A                                                                  | 3  | 3.06122449 | 9.87E-05 | CCND1, AKT1, EGFR                                                                             | 98 | 3   | 16792 | 171.34694 | 0.1706038 | 0.00208626 | 0.00183414 |
| GOTERM_BP_DIRECT | positive regulation of calcidiol 1-monooxygenase                                  | 3  | 3.06122449 | 9.87E-05 | IFNG, IL1B, TNF                                                                               | 98 | 3   | 16792 | 171.34694 | 0.1706038 | 0.00208626 | 0.00183414 |
| GOTERM_BP_DIRECT | ovarian follicle development                                                      | 5  | 5.10204082 | 9.90E-05 | MYC, BCL2, BAX, ICAM1, SOD1                                                                   | 98 | 42  | 16792 | 20.398445 | 0.171008  | 0.00208626 | 0.00183414 |
| GOTERM_BP_DIRECT | extrinsic apoptotic signaling pathway                                             | 5  | 5.10204082 | 9.90E-05 | TGFB1, CASP8, IFNG, BAX, TNF                                                                  | 98 | 42  | 16792 | 20.398445 | 0.171008  | 0.00208626 | 0.00183414 |
| GOTERM_BP_DIRECT | response to muscle stretch                                                        | 4  | 4.08163265 | 9.91E-05 | JUN, FOS, MAPK14, RELA                                                                        | 98 | 16  | 16792 | 42.836735 | 0.1711966 | 0.00208626 | 0.00183414 |

|                  |                                                                        |    |            |          |                                                                           |    |     |       |           |           |            |            |
|------------------|------------------------------------------------------------------------|----|------------|----------|---------------------------------------------------------------------------|----|-----|-------|-----------|-----------|------------|------------|
| GOTERM_BP_DIRECT | negative regulation of neuron apoptotic process                        | 7  | 7.14285714 | 1.16E-04 | JUN, BCL2, BAX, HMOX1, CCL2, BIRC5, SOD1                                  | 98 | 132 | 16792 | 9.0865801 | 0.1971304 | 0.00241264 | 0.00212109 |
| GOTERM_BP_DIRECT | cellular response to positive regulation of protein kinase B signaling | 5  | 5.10204082 | 1.19E-04 | CASP9, MYC, BAX, PTGS2, TP53                                              | 98 | 44  | 16792 | 19.471243 | 0.2018508 | 0.0024505  | 0.00215437 |
| GOTERM_BP_DIRECT | endoplasmic reticulum unfolded protein response                        | 6  | 6.12244898 | 1.25E-04 | IL6, TGFB1, INSR, TNF, F3, EGFR                                           | 98 | 84  | 16792 | 12.239067 | 0.2105967 | 0.00254262 | 0.00223535 |
| GOTERM_BP_DIRECT | response to vitamin D                                                  | 5  | 5.10204082 | 1.30E-04 | PTPN1, IFNG, CCND1, HSPA5, NFE2L2                                         | 98 | 45  | 16792 | 19.038549 | 0.2183644 | 0.00262075 | 0.00230405 |
| GOTERM_BP_DIRECT | proteolysis                                                            | 4  | 4.08163265 | 1.43E-04 | CXCL10, TGFB1, SPP1, PTGS2                                                | 98 | 18  | 16792 | 38.077098 | 0.237636  | 0.00284843 | 0.00250421 |
| GOTERM_BP_DIRECT | immune response                                                        | 12 | 12.244898  | 1.44E-04 | CASP9, DPP4, PRSS1, IGHG1, CASP8, PLA2, MMP1, CASP3, MMP2, F2, CTSD, MMP9 | 98 | 500 | 16792 | 4.1123265 | 0.2392642 | 0.00284843 | 0.00250421 |
| GOTERM_BP_DIRECT | cell cycle arrest                                                      | 11 | 11.2244898 | 1.59E-04 | OPRD1, IL1A, CXCL10, IL6, CXCL11, CXCL8, IFNG, CHUK, IL1B, CCL2, TNF      | 98 | 421 | 16792 | 4.4769984 | 0.2598415 | 0.00310172 | 0.0027269  |
| GOTERM_BP_DIRECT | response to heat                                                       | 7  | 7.14285714 | 1.66E-04 | CDKN1A, TGFB1, CXCL8, IFNG, MYC, IRF1, TP53                               | 98 | 141 | 16792 | 8.5065856 | 0.2703632 | 0.00320695 | 0.00281941 |
| GOTERM_BP_DIRECT | re-entry into mitotic cell cycle                                       | 5  | 5.10204082 | 1.68E-04 | IL6, HSP90AA1, CCL2, AKT1, SOD1                                           | 98 | 48  | 16792 | 17.848639 | 0.272044  | 0.00320695 | 0.00281941 |
| GOTERM_BP_DIRECT | stress-induced premature senescence                                    | 3  | 3.06122449 | 1.97E-04 | GSK3B, CCND1, MYC                                                         | 98 | 4   | 16792 | 128.5102  | 0.3111434 | 0.00368503 | 0.00323972 |
| GOTERM_BP_DIRECT | positive regulation of pri-miRNA transcription from RNA polymerase II  | 3  | 3.06122449 | 1.97E-04 | CDKN1A, MAPK14, SIRT1                                                     | 98 | 4   | 16792 | 128.5102  | 0.3111434 | 0.00368503 | 0.00323972 |
| GOTERM_BP_DIRECT | cellular response to DNA damage stimulus                               | 4  | 4.08163265 | 1.98E-04 | JUN, TGFB1, FOS, RELA                                                     | 98 | 20  | 16792 | 34.269388 | 0.3133364 | 0.00368503 | 0.00323972 |
| GOTERM_BP_DIRECT | response to cytokine                                                   | 8  | 8.16326531 | 2.02E-04 | CASP9, CDKN1A, CCND1, MYC, BCL2, AKT1, SIRT1, TP53                        | 98 | 208 | 16792 | 6.5902669 | 0.3186649 | 0.00372488 | 0.00327474 |
| GOTERM_BP_DIRECT | response to food                                                       | 5  | 5.10204082 | 2.29E-04 | COL3A1, JUN, STAT1, BCL2, FOS                                             | 98 | 52  | 16792 | 16.475667 | 0.352121  | 0.00411967 | 0.00362183 |
| GOTERM_BP_DIRECT | response to immobilization stress                                      | 4  | 4.08163265 | 2.30E-04 | CYP1A1, AKT1, OPRM1, MPO                                                  | 98 | 21  | 16792 | 32.637512 | 0.3538576 | 0.00411967 | 0.00362183 |
| GOTERM_BP_DIRECT | transcription initiation from RNA polymerase II promoter               | 4  | 4.08163265 | 2.30E-04 | TGFB1, CYP1A1, PPARG, FOS                                                 | 98 | 21  | 16792 | 32.637512 | 0.3538576 | 0.00411967 | 0.00362183 |
| GOTERM_BP_DIRECT | cell proliferation                                                     | 7  | 7.14285714 | 2.50E-04 | RXRA, NR1I3, NR1I2, PPARG, PPARA, ESR1, PPARG                             | 98 | 152 | 16792 | 7.8909774 | 0.3774447 | 0.00442863 | 0.00389346 |
| GOTERM_BP_DIRECT | protein phosphorylation                                                | 10 | 10.2040816 | 2.66E-04 | IL1A, CHRM3, MYC, PTEN, BCL2, CYP1A1, AKT1, TP53, EGFR, PPARG             | 98 | 366 | 16792 | 4.6816103 | 0.3959717 | 0.00466729 | 0.00410327 |
| GOTERM_BP_DIRECT | negative regulation of myoblast                                        | 11 | 11.2244898 | 3.01E-04 | IKBKB, GSK3B, MAPK8, TGFB1, CCND1, CHUK, IGFBP3, CCL2, BIRC5, AKT1, PRKCA | 98 | 456 | 16792 | 4.1333691 | 0.4352057 | 0.00519485 | 0.00456708 |
| GOTERM_BP_DIRECT | cellular response to vascular endothelial growth factor stimulus       | 4  | 4.08163265 | 3.04E-04 | CXCL10, TGFB1, TNF, PPARG                                                 | 98 | 23  | 16792 | 29.799468 | 0.4382601 | 0.00519485 | 0.00456708 |
| GOTERM_BP_DIRECT | positive regulation of fever generation                                | 4  | 4.08163265 | 3.04E-04 | VCAM1, HSPB1, AKT1, MAPK14                                                | 98 | 23  | 16792 | 29.799468 | 0.4382601 | 0.00519485 | 0.00456708 |
| GOTERM_BP_DIRECT | humoral immune response                                                | 3  | 3.06122449 | 3.27E-04 | IL1B, PTGS2, TNF                                                          | 98 | 5   | 16792 | 102.80816 | 0.4614649 | 0.00538638 | 0.00473546 |
| GOTERM_BP_DIRECT | negative regulation of protein binding                                 | 5  | 5.10204082 | 3.27E-04 | IL6, IFNG, BCL2, CCL2, TNF                                                | 98 | 57  | 16792 | 15.030433 | 0.4618051 | 0.00538638 | 0.00473546 |
| GOTERM_BP_DIRECT | cellular response to hydrogen peroxide                                 | 5  | 5.10204082 | 3.27E-04 | GSK3B, MAPK8, CAV1, BAX, PPARA                                            | 98 | 57  | 16792 | 15.030433 | 0.4618051 | 0.00538638 | 0.00473546 |
| GOTERM_BP_DIRECT | positive regulation of I-kappaB kinase/NF-kappaB signaling             | 5  | 5.10204082 | 3.27E-04 | IL6, CYP1B1, SIRT1, RELA, NFE2L2                                          | 98 | 57  | 16792 | 15.030433 | 0.4618051 | 0.00538638 | 0.00473546 |
| GOTERM_BP_DIRECT | response to calcium                                                    | 7  | 7.14285714 | 3.41E-04 | IKBKB, IL1A, CASP8, CHUK, HMOX1, TNF, RELA                                | 98 | 161 | 16792 | 7.4498669 | 0.4756931 | 0.00556524 | 0.00489271 |
| GOTERM_BP_DIRECT |                                                                        | 5  | 5.10204082 | 3.50E-04 | PPP3CA, IL6, CCND1, CAV1, EGFR                                            | 98 | 58  | 16792 | 14.771288 | 0.4844426 | 0.00566146 | 0.00497731 |

|                  |                                                                                                              |   |            |          |                                            |    |     |       |           |           |            |            |
|------------------|--------------------------------------------------------------------------------------------------------------|---|------------|----------|--------------------------------------------|----|-----|-------|-----------|-----------|------------|------------|
| GOTERM_BP_DIRECT | defense response to virus                                                                                    | 7 | 7.14285714 | 3.88E-04 | CXCL10, IL6, IFNG, STAT1, IRF1, BCL2, RELA | 98 | 165 | 16792 | 7.2692641 | 0.5210371 | 0.0062372  | 0.00548347 |
| GOTERM_BP_DIRECT | response to tumor necrosis factor                                                                            | 4 | 4.08163265 | 3.92E-04 | CASP8, CASP3, PTGS2, SELE                  | 98 | 25  | 16792 | 27.41551  | 0.524205  | 0.00624053 | 0.00548639 |
| GOTERM_BP_DIRECT | response to virus                                                                                            | 6 | 6.12244898 | 4.40E-04 | IKBKB, IFNG, CHUK, CYP1A1, HSPB1, TNF      | 98 | 110 | 16792 | 9.3461967 | 0.5653619 | 0.00688478 | 0.00605279 |
| GOTERM_BP_DIRECT | response to oxidative stress                                                                                 | 6 | 6.12244898 | 4.40E-04 | HMOX1, AKT1, PTGS2, MPO, SIRT1, EGFR       | 98 | 110 | 16792 | 9.3461967 | 0.5653619 | 0.00688478 | 0.00605279 |
| GOTERM_BP_DIRECT | memory                                                                                                       | 5 | 5.10204082 | 4.52E-04 | PTEN, DRD1, HTR2A, PTGS2, SLC6A4           | 98 | 62  | 16792 | 13.818302 | 0.5751042 | 0.00701408 | 0.00616647 |
| GOTERM_BP_DIRECT | response to wounding                                                                                         | 5 | 5.10204082 | 4.80E-04 | TGFB1, MYC, CYP1A1, CCL2, F2               | 98 | 63  | 16792 | 13.598963 | 0.5974497 | 0.00728115 | 0.00640126 |
| GOTERM_BP_DIRECT | positive regulation of interleukin-12 biosynthetic process                                                   | 3 | 3.06122449 | 4.88E-04 | IFNG, IRF1, RELA                           | 98 | 6   | 16792 | 85.673469 | 0.6034414 | 0.00728115 | 0.00640126 |
| GOTERM_BP_DIRECT | response to cobalt ion                                                                                       | 3 | 3.06122449 | 4.88E-04 | CASP9, CASP8, CASP3                        | 98 | 6   | 16792 | 85.673469 | 0.6034414 | 0.00728115 | 0.00640126 |
| GOTERM_BP_DIRECT | macrophage derived foam cell                                                                                 | 3 | 3.06122449 | 4.88E-04 | TGFB1, STAT1, PPARG                        | 98 | 6   | 16792 | 85.673469 | 0.6034414 | 0.00728115 | 0.00640126 |
| GOTERM_BP_DIRECT | negative regulation of production of miRNAs involved in gene silencing by miRNA                              | 3 | 3.06122449 | 4.88E-04 | PPP3CA, TGFB1, ESR1                        | 98 | 6   | 16792 | 85.673469 | 0.6034414 | 0.00728115 | 0.00640126 |
| GOTERM_BP_DIRECT | collagen catabolic process                                                                                   | 5 | 5.10204082 | 5.10E-04 | COL3A1, MMP1, MMP2, CTSD, MMP9             | 98 | 64  | 16792 | 13.38648  | 0.6195295 | 0.00754766 | 0.00663557 |
| GOTERM_BP_DIRECT | response to glucocorticoid                                                                                   | 5 | 5.10204082 | 5.41E-04 | IL6, CASP3, BCL2, PTGS2, TNF               | 98 | 65  | 16792 | 13.180534 | 0.6412771 | 0.00794518 | 0.00698505 |
| GOTERM_BP_DIRECT | response to radiation                                                                                        | 4 | 4.08163265 | 5.51E-04 | COL3A1, JUN, BCL2, OPRM1                   | 98 | 28  | 16792 | 24.478134 | 0.6482533 | 0.00797371 | 0.00701013 |
| GOTERM_BP_DIRECT | regulation of mitochondrial membrane potential                                                               | 4 | 4.08163265 | 5.51E-04 | OPRD1, BCL2, BAX, SOD1                     | 98 | 28  | 16792 | 24.478134 | 0.6482533 | 0.00797371 | 0.00701013 |
| GOTERM_BP_DIRECT | Fc-epsilon receptor signaling pathway                                                                        | 7 | 7.14285714 | 5.80E-04 | IKBKB, PPP3CA, JUN, MAPK8, CHUK, FOS, RELA | 98 | 178 | 16792 | 6.7383628 | 0.6672205 | 0.008333   | 0.007326   |
| GOTERM_BP_DIRECT | glucose metabolic process                                                                                    | 5 | 5.10204082 | 6.07E-04 | MYC, AKT1, MAPK14, TNF, PPARG              | 98 | 67  | 16792 | 12.787085 | 0.6835224 | 0.00846875 | 0.00744535 |
| GOTERM_BP_DIRECT | regulation of insulin secretion                                                                              | 5 | 5.10204082 | 6.07E-04 | IFNG, NOS2, IL1B, PRKCA, TNF               | 98 | 67  | 16792 | 12.787085 | 0.6835224 | 0.00846875 | 0.00744535 |
| GOTERM_BP_DIRECT | positive regulation of vasodilation                                                                          | 4 | 4.08163265 | 6.12E-04 | NOS2, HMOX1, EGFR, PPARG                   | 98 | 29  | 16792 | 23.634061 | 0.6866936 | 0.00846875 | 0.00744535 |
| GOTERM_BP_DIRECT | cellular response to glucose starvation                                                                      | 4 | 4.08163265 | 6.12E-04 | HSPA5, BCL2, TP53, NFE2L2                  | 98 | 29  | 16792 | 23.634061 | 0.6866936 | 0.00846875 | 0.00744535 |
| GOTERM_BP_DIRECT | endothelial cell migration                                                                                   | 4 | 4.08163265 | 6.12E-04 | DPP4, STAT1, PTEN, CYP1B1                  | 98 | 29  | 16792 | 23.634061 | 0.6866936 | 0.00846875 | 0.00744535 |
| GOTERM_BP_DIRECT | positive regulation of glucose import                                                                        | 4 | 4.08163265 | 6.77E-04 | INSR, AKT1, MAPK14, NFE2L2                 | 98 | 30  | 16792 | 22.846259 | 0.7231243 | 0.0091469  | 0.00804155 |
| GOTERM_BP_DIRECT | positive regulation of protein insertion into mitochondrial membrane involved in apoptotic signaling pathway | 4 | 4.08163265 | 6.77E-04 | MAPK8, CASP8, BCL2, TP53                   | 98 | 30  | 16792 | 22.846259 | 0.7231243 | 0.0091469  | 0.00804155 |
| GOTERM_BP_DIRECT | regulation of tumor necrosis factor-mediated signaling pathway                                               | 4 | 4.08163265 | 6.77E-04 | IKBKB, CASP8, CHUK, TNF                    | 98 | 30  | 16792 | 22.846259 | 0.7231243 | 0.0091469  | 0.00804155 |
| GOTERM_BP_DIRECT | regulation of establishment of endothelial barrier                                                           | 3 | 3.06122449 | 6.81E-04 | IKBKB, IL1B, TNF                           | 98 | 7   | 16792 | 73.434402 | 0.7247711 | 0.0091469  | 0.00804155 |
| GOTERM_BP_DIRECT | chemotaxis                                                                                                   | 6 | 6.12244898 | 7.05E-04 | CXCL10, CXCL11, CXCL8, PLAU, CCL2, MAPK14  | 98 | 122 | 16792 | 8.4268986 | 0.7372855 | 0.00940997 | 0.00827283 |

|                  |                                                                                                  |   |            |            |                                                    |    |     |       |           |           |            |            |
|------------------|--------------------------------------------------------------------------------------------------|---|------------|------------|----------------------------------------------------|----|-----|-------|-----------|-----------|------------|------------|
| GOTERM_BP_DIRECT | regulation of cell proliferation                                                                 | 7 | 7.14285714 | 7.11E-04   | CXCL10, CXCL11, JUN, NOS2, PLA2, SIRT1, TNF        | 98 | 185 | 16792 | 6.4833977 | 0.7400316 | 0.0094176  | 0.00827954 |
| GOTERM_BP_DIRECT | negative regulation of fibroblast proliferation                                                  | 4 | 4.08163265 | 7.47E-04   | IFNG, MYC, BAX, TP53                               | 98 | 31  | 16792 | 22.109282 | 0.7572918 | 0.00976115 | 0.00858157 |
| GOTERM_BP_DIRECT | response to amphetamine                                                                          | 4 | 4.08163265 | 7.47E-04   | PPP3CA, DRD1, ICAM1, SOD1                          | 98 | 31  | 16792 | 22.109282 | 0.7572918 | 0.00976115 | 0.00858157 |
| GOTERM_BP_DIRECT | interferon-gamma-mediated signaling pathway                                                      | 5 | 5.10204082 | 7.56E-04   | VCAM1, IFNG, STAT1, IRF1, ICAM1                    | 98 | 71  | 16792 | 12.066686 | 0.7614328 | 0.00981207 | 0.00862634 |
| GOTERM_BP_DIRECT | peptidyl-serine phosphorylation                                                                  | 6 | 6.12244898 | 7.87E-04   | GSK3B, MAPK8, BCL2, AKT1, PRKCA, MAPK14            | 98 | 125 | 16792 | 8.2246531 | 0.775081  | 0.01014577 | 0.00891971 |
| GOTERM_BP_DIRECT | brown fat cell differentiation                                                                   | 4 | 4.08163265 | 8.21E-04   | ADRB1, SLC2A4, ADRB2, PTGS2                        | 98 | 32  | 16792 | 21.418367 | 0.7890022 | 0.01050857 | 0.00923867 |
| GOTERM_BP_DIRECT | positive regulation of intrinsic apoptotic signaling pathway                                     | 4 | 4.08163265 | 8.99E-04   | CAV1, BCL2, BAX, TP53                              | 98 | 33  | 16792 | 20.769326 | 0.8181236 | 0.01112432 | 0.00978001 |
| GOTERM_BP_DIRECT | negative regulation of extrinsic apoptotic signaling pathway via death domain                    | 4 | 4.08163265 | 8.99E-04   | CASP8, SERPINE1, HMOX1, ICAM1                      | 98 | 33  | 16792 | 20.769326 | 0.8181236 | 0.01112432 | 0.00978001 |
| GOTERM_BP_DIRECT | ectopic germ cell programmed cell death                                                          | 3 | 3.06122449 | 9.04E-04   | IL1A, IL1B, BAX                                    | 98 | 8   | 16792 | 64.255102 | 0.8198417 | 0.01112432 | 0.00978001 |
| GOTERM_BP_DIRECT | activation of signaling protein activity involved in unfolded protein response                   | 3 | 3.06122449 | 9.04E-04   | PTPN1, HSPA5, BAX                                  | 98 | 8   | 16792 | 64.255102 | 0.8198417 | 0.01112432 | 0.00978001 |
| GOTERM_BP_DIRECT | negative regulation of lipid storage                                                             | 3 | 3.06122449 | 9.04E-04   | CRP, IL6, TNF                                      | 98 | 8   | 16792 | 64.255102 | 0.8198417 | 0.01112432 | 0.00978001 |
| GOTERM_BP_DIRECT | negative regulation of collagen biosynthetic process                                             | 3 | 3.06122449 | 9.04E-04   | IL6, PPARG, PPARG                                  | 98 | 8   | 16792 | 64.255102 | 0.8198417 | 0.01112432 | 0.00978001 |
| GOTERM_BP_DIRECT | cytokine-mediated signaling pathway                                                              | 6 | 6.12244898 | 9.72E-04   | IL1A, IL6, IL1B, CCL2, F3, RELA                    | 98 | 131 | 16792 | 7.8479514 | 0.8416095 | 0.01186192 | 0.01042847 |
| GOTERM_BP_DIRECT | extracellular matrix disassembly                                                                 | 5 | 5.10204082 | 9.76E-04   | PRSS1, MMP1, MMP2, SPP1, MMP9                      | 98 | 76  | 16792 | 11.272825 | 0.8429771 | 0.01186192 | 0.01042847 |
| GOTERM_BP_DIRECT | cell surface receptor signaling pathway                                                          | 8 | 8.16326531 | 0.00104981 | CXCL10, CASP8, IFNG, CCL2, ADRB2, F2, MAPK14, EGFR | 98 | 274 | 16792 | 5.0028303 | 0.863365  | 0.01267132 | 0.01114006 |
| GOTERM_BP_DIRECT | xenobiotic metabolic process                                                                     | 5 | 5.10204082 | 0.00107618 | NQO1, NR1I2, CYP1B1, AHR, CYP3A4                   | 98 | 78  | 16792 | 10.983778 | 0.8700301 | 0.01290731 | 0.01134753 |
| GOTERM_BP_DIRECT | activation of cysteine-type endopeptidase activity involved in apoptotic process by cytochrome c | 3 | 3.06122449 | 0.00115796 | CASP9, CASP3, BAX                                  | 98 | 9   | 16792 | 57.115646 | 0.8887081 | 0.01371455 | 0.01205722 |
| GOTERM_BP_DIRECT | response to salt stress                                                                          | 3 | 3.06122449 | 0.00115796 | HSP90AA1, BAX, TNF                                 | 98 | 9   | 16792 | 57.115646 | 0.8887081 | 0.01371455 | 0.01205722 |
| GOTERM_BP_DIRECT | cellular response to                                                                             | 4 | 4.08163265 | 0.00125912 | IL1A, CXCL10, CDKN1A, HMOX1                        | 98 | 37  | 16792 | 18.523993 | 0.9081436 | 0.01482003 | 0.01302911 |
| GOTERM_BP_DIRECT | positive regulation of peptidyl-tyrosine phosphorylation                                         | 5 | 5.10204082 | 0.0012966  | IL6, TGFB1, HTR2A, TP53, ICAM1                     | 98 | 82  | 16792 | 10.447984 | 0.9144505 | 0.01516708 | 0.01333422 |
| GOTERM_BP_DIRECT | peptidyl-threonine phosphorylation                                                               | 4 | 4.08163265 | 0.00136135 | GSK3B, MAPK8, BCL2, AKT1                           | 98 | 38  | 16792 | 18.03652  | 0.9243403 | 0.01573019 | 0.01382929 |
| GOTERM_BP_DIRECT | intracellular receptor signaling pathway                                                         | 4 | 4.08163265 | 0.00136135 | NR1I2, AHR, PPARG, PPARG                           | 98 | 38  | 16792 | 18.03652  | 0.9243403 | 0.01573019 | 0.01382929 |
| GOTERM_BP_DIRECT | striated muscle cell differentiation                                                             | 3 | 3.06122449 | 0.001442   | CHUK, AKT1, MAPK14                                 | 98 | 10  | 16792 | 51.404082 | 0.9350778 | 0.01636284 | 0.01438548 |

|                  |                                                                                             |    |            |            |                                                                                                               |    |      |       |           |           |            |            |
|------------------|---------------------------------------------------------------------------------------------|----|------------|------------|---------------------------------------------------------------------------------------------------------------|----|------|-------|-----------|-----------|------------|------------|
| GOTERM_BP_DIRECT | negative regulation of fibrinolysis                                                         | 3  | 3.06122449 | 0.001442   | THBD, SERPINE1, F2                                                                                            | 98 | 10   | 16792 | 51.404082 | 0.9350778 | 0.01636284 | 0.01438548 |
| GOTERM_BP_DIRECT | ER overload response                                                                        | 3  | 3.06122449 | 0.001442   | GSK3B, HSPA5, TP53                                                                                            | 98 | 10   | 16792 | 51.404082 | 0.9350778 | 0.01636284 | 0.01438548 |
| GOTERM_BP_DIRECT | movement of cell or subcellular component                                                   | 5  | 5.10204082 | 0.00154682 | CXCL8, IFNG, HSPB1, MAPK14, PTGS2                                                                             | 98 | 86   | 16792 | 9.9620313 | 0.9467891 | 0.01741991 | 0.01531481 |
| GOTERM_BP_DIRECT | activation of adenylate cyclase activity                                                    | 4  | 4.08163265 | 0.00158112 | ADRB1, PRKCA, DRD1, ADRB2                                                                                     | 98 | 40   | 16792 | 17.134694 | 0.950143  | 0.01741991 | 0.01531481 |
| GOTERM_BP_DIRECT | regulation of mitotic cell cycle                                                            | 4  | 4.08163265 | 0.00158112 | CDKN1A, MYC, BIRC5, SIRT1                                                                                     | 98 | 40   | 16792 | 17.134694 | 0.950143  | 0.01741991 | 0.01531481 |
| GOTERM_BP_DIRECT | negative regulation of neuron death                                                         | 4  | 4.08163265 | 0.00158112 | IL6, AKT1, PPARA, SIRT1                                                                                       | 98 | 40   | 16792 | 17.134694 | 0.950143  | 0.01741991 | 0.01531481 |
| GOTERM_BP_DIRECT | negative regulation of I-kappaB kinase/NF-kappaB signaling                                  | 4  | 4.08163265 | 0.00158112 | CASP8, STAT1, ESR1, SIRT1                                                                                     | 98 | 40   | 16792 | 17.134694 | 0.950143  | 0.01741991 | 0.01531481 |
| GOTERM_BP_DIRECT | negative regulation of epithelial cell differentiation                                      | 3  | 3.06122449 | 0.00175582 | IFNG, CCND1, CAV1                                                                                             | 98 | 11   | 16792 | 46.730983 | 0.9642143 | 0.01923285 | 0.01690867 |
| GOTERM_BP_DIRECT | lactation                                                                                   | 4  | 4.08163265 | 0.00182191 | CCND1, CAV1, XDH, SLC6A3                                                                                      | 98 | 42   | 16792 | 16.318756 | 0.968434  | 0.01961663 | 0.01724607 |
| GOTERM_BP_DIRECT | positive regulation of DNA replication                                                      | 4  | 4.08163265 | 0.00182191 | IL6, JUN, INSR, EGFR                                                                                          | 98 | 42   | 16792 | 16.318756 | 0.968434  | 0.01961663 | 0.01724607 |
| GOTERM_BP_DIRECT | negative regulation of fat cell differentiation                                             | 4  | 4.08163265 | 0.00182191 | IL6, TGFB1, SIRT1, TNF                                                                                        | 98 | 42   | 16792 | 16.318756 | 0.968434  | 0.01961663 | 0.01724607 |
| GOTERM_BP_DIRECT | steroid metabolic process                                                                   | 4  | 4.08163265 | 0.00195041 | NR1I2, CYP1A1, CYP1B1, CYP3A4                                                                                 | 98 | 43   | 16792 | 15.93925  | 0.9752675 | 0.02088151 | 0.0183581  |
| GOTERM_BP_DIRECT | transforming growth factor beta receptor signaling pathway                                  | 5  | 5.10204082 | 0.00198242 | COL3A1, JUN, TGFB1, CCL2, FOS                                                                                 | 98 | 92   | 16792 | 9.3123336 | 0.9767258 | 0.02110495 | 0.01855454 |
| GOTERM_BP_DIRECT | removal of superoxide radicals                                                              | 3  | 3.06122449 | 0.00209907 | NQO1, MPO, SOD1                                                                                               | 98 | 12   | 16792 | 42.836735 | 0.9813501 | 0.02222199 | 0.01953659 |
| GOTERM_BP_DIRECT | positive regulation of interleukin-6                                                        | 4  | 4.08163265 | 0.00222402 | IL1A, IL6, IL1B, TNF                                                                                          | 98 | 45   | 16792 | 15.230839 | 0.9852897 | 0.02341398 | 0.02058453 |
| GOTERM_BP_DIRECT | G-protein coupled receptor signaling pathway, coupled to cyclic nucleotide second messenger | 4  | 4.08163265 | 0.00236929 | OPRD1, CCL2, DRD1, OPRM1                                                                                      | 98 | 46   | 16792 | 14.899734 | 0.9888369 | 0.02480559 | 0.02180797 |
| GOTERM_BP_DIRECT | cellular response to ATP                                                                    | 3  | 3.06122449 | 0.0024714  | CCL2, PTGS2, SOD1                                                                                             | 98 | 13   | 16792 | 39.541601 | 0.9908051 | 0.02517906 | 0.02213631 |
| GOTERM_BP_DIRECT | response to arsenic-containing substance                                                    | 3  | 3.06122449 | 0.0024714  | CDKN1A, PTEN, CYP1A1                                                                                          | 98 | 13   | 16792 | 39.541601 | 0.9908051 | 0.02517906 | 0.02213631 |
| GOTERM_BP_DIRECT | negative regulation of macrophage derived foam cell                                         | 3  | 3.06122449 | 0.0024714  | CRP, PPARG, PPARA                                                                                             | 98 | 13   | 16792 | 39.541601 | 0.9908051 | 0.02517906 | 0.02213631 |
| GOTERM_BP_DIRECT | leukocyte tethering or rolling                                                              | 3  | 3.06122449 | 0.0024714  | VCAM1, SELE, TNF                                                                                              | 98 | 13   | 16792 | 39.541601 | 0.9908051 | 0.02517906 | 0.02213631 |
| GOTERM_BP_DIRECT | prepulse inhibition                                                                         | 3  | 3.06122449 | 0.0024714  | PTEN, DRD1, SLC6A3                                                                                            | 98 | 13   | 16792 | 39.541601 | 0.9908051 | 0.02517906 | 0.02213631 |
| GOTERM_BP_DIRECT | positive regulation of fat cell differentiation                                             | 4  | 4.08163265 | 0.00252032 | AKT1, PPARG, HTR2A, PPARD                                                                                     | 98 | 47   | 16792 | 14.582718 | 0.9916211 | 0.02540428 | 0.02233432 |
| GOTERM_BP_DIRECT | cellular response to amino acid stimulus                                                    | 4  | 4.08163265 | 0.00252032 | COL3A1, MMP2, TNF, EGFR                                                                                       | 98 | 47   | 16792 | 14.582718 | 0.9916211 | 0.02540428 | 0.02233432 |
| GOTERM_BP_DIRECT | signal transduction                                                                         | 16 | 16.3265306 | 0.00262593 | CHRM3, HSP90AA1, CXCL8, NR1I3, NR1I2, MAPK14, ESR1, EGFR, CXCL10, THBD, CXCL11, PLA2, IL1B, CCL2, AKT1, PPARG | 98 | 1161 | 16792 | 2.3613704 | 0.9931443 | 0.02632875 | 0.02314707 |
| GOTERM_BP_DIRECT | glucose homeostasis                                                                         | 5  | 5.10204082 | 0.00278477 | IL6, INSR, AKT1, PPARG, SLC2A4                                                                                | 98 | 101  | 16792 | 8.4825217 | 0.9949304 | 0.02777216 | 0.02441605 |
| GOTERM_BP_DIRECT | transcription from RNA polymerase II                                                        | 10 | 10.2040816 | 0.00285513 | JUN, MYC, IRF1, FOS, AHR, ELK1, ESR1, TP53, RELA, NFE2L2                                                      | 98 | 513  | 16792 | 3.3400963 | 0.9955649 | 0.02777216 | 0.02441605 |



|                  |                                                                |   |            |            |                                          |    |     |       |           |           |            |            |
|------------------|----------------------------------------------------------------|---|------------|------------|------------------------------------------|----|-----|-------|-----------|-----------|------------|------------|
| GOTERM_BP_DIRECT | positive regulation of glycolytic process                      | 3 | 3.06122449 | 0.00287248 | MYC, INSR, HTR2A                         | 98 | 14  | 16792 | 36.717201 | 0.9957087 | 0.02777216 | 0.02441605 |
| GOTERM_BP_DIRECT | cellular response to hepatocyte growth factor stimulus         | 3 | 3.06122449 | 0.00287248 | GSK3B, IL6, RELA                         | 98 | 14  | 16792 | 36.717201 | 0.9957087 | 0.02777216 | 0.02441605 |
| GOTERM_BP_DIRECT | positive regulation of protein                                 | 3 | 3.06122449 | 0.00287248 | MMP1, BAX, TP53                          | 98 | 14  | 16792 | 36.717201 | 0.9957087 | 0.02777216 | 0.02441605 |
| GOTERM_BP_DIRECT | positive regulation of blood coagulation                       | 3 | 3.06122449 | 0.00287248 | SERPINE1, F2, NFE2L2                     | 98 | 14  | 16792 | 36.717201 | 0.9957087 | 0.02777216 | 0.02441605 |
| GOTERM_BP_DIRECT | negative regulation of smooth muscle cell migration            | 3 | 3.06122449 | 0.00287248 | IGFBP3, SERPINE1, PPARD                  | 98 | 14  | 16792 | 36.717201 | 0.9957087 | 0.02777216 | 0.02441605 |
| GOTERM_BP_DIRECT | regulation of I-kappaB kinase/NF-kappaB signaling              | 3 | 3.06122449 | 0.00330196 | IL1B, HSPB1, TNF                         | 98 | 15  | 16792 | 34.269388 | 0.9981032 | 0.03144328 | 0.02764354 |
| GOTERM_BP_DIRECT | response to copper ion                                         | 3 | 3.06122449 | 0.00330196 | IL1A, ICAM1, SOD1                        | 98 | 15  | 16792 | 34.269388 | 0.9981032 | 0.03144328 | 0.02764354 |
| GOTERM_BP_DIRECT | positive regulation of membrane protein ectodomain proteolysis | 3 | 3.06122449 | 0.00330196 | IFNG, IL1B, TNF                          | 98 | 15  | 16792 | 34.269388 | 0.9981032 | 0.03144328 | 0.02764354 |
| GOTERM_BP_DIRECT | activation of MAPK activity                                    | 5 | 5.10204082 | 0.00342859 | IL1B, INSR, MAPK14, TNF, SOD1            | 98 | 107 | 16792 | 8.0068663 | 0.998509  | 0.03248584 | 0.02856011 |
| GOTERM_BP_DIRECT | negative regulation of growth of symbiont in host              | 3 | 3.06122449 | 0.00375951 | IFNG, MPO, TNF                           | 98 | 16  | 16792 | 32.127551 | 0.9992054 | 0.03509496 | 0.03085393 |
| GOTERM_BP_DIRECT | execution phase of apoptosis                                   | 3 | 3.06122449 | 0.00375951 | CASP8, CASP3, AKT1                       | 98 | 16  | 16792 | 32.127551 | 0.9992054 | 0.03509496 | 0.03085393 |
| GOTERM_BP_DIRECT | positive regulation of monocyte chemotaxis                     | 3 | 3.06122449 | 0.00375951 | CXCL10, SERPINE1, CCL2                   | 98 | 16  | 16792 | 32.127551 | 0.9992054 | 0.03509496 | 0.03085393 |
| GOTERM_BP_DIRECT | MAPK cascade                                                   | 7 | 7.14285714 | 0.00412262 | TGFB1, MYC, IL1B, CAV1, CCL2, TNF, EGFR  | 98 | 262 | 16792 | 4.5779716 | 0.9996018 | 0.03829594 | 0.03366809 |
| GOTERM_BP_DIRECT | heart development                                              | 6 | 6.12244898 | 0.00418034 | COL3A1, TGFB1, PTEN, PPARG, PPARA, PPARD | 98 | 183 | 16792 | 5.6179324 | 0.9996432 | 0.03864265 | 0.03397291 |
| GOTERM_BP_DIRECT | cellular response to prostaglandin E stimulus                  | 3 | 3.06122449 | 0.00424481 | AKT1, PPARG, ACACA                       | 98 | 17  | 16792 | 30.237695 | 0.9996844 | 0.03904809 | 0.03432935 |
| GOTERM_BP_DIRECT | platelet activation                                            | 5 | 5.10204082 | 0.00443352 | COL3A1, IL6, AKT1, PRKCA, F2             | 98 | 115 | 16792 | 7.4498669 | 0.9997803 | 0.04060247 | 0.03569589 |
| GOTERM_BP_DIRECT | response to vitamin A                                          | 3 | 3.06122449 | 0.00475751 | CYP1A1, PPARG, PPARD                     | 98 | 18  | 16792 | 28.557823 | 0.9998811 | 0.04252586 | 0.03738685 |
| GOTERM_BP_DIRECT | positive regulation of leukocyte chemotaxis                    | 3 | 3.06122449 | 0.00475751 | CXCL10, IL6, CXCL11                      | 98 | 18  | 16792 | 28.557823 | 0.9998811 | 0.04252586 | 0.03738685 |
| GOTERM_BP_DIRECT | macrophage differentiation                                     | 3 | 3.06122449 | 0.00475751 | CASP8, SIRT1, MMP9                       | 98 | 18  | 16792 | 28.557823 | 0.9998811 | 0.04252586 | 0.03738685 |
| GOTERM_BP_DIRECT | response to iron ion                                           | 3 | 3.06122449 | 0.00475751 | CCND1, BCL2, SLC6A3                      | 98 | 18  | 16792 | 28.557823 | 0.9998811 | 0.04252586 | 0.03738685 |
| GOTERM_BP_DIRECT | response to corticosterone                                     | 3 | 3.06122449 | 0.00475751 | CDKN1A, CCND1, FOS                       | 98 | 18  | 16792 | 28.557823 | 0.9998811 | 0.04252586 | 0.03738685 |
| GOTERM_BP_DIRECT | positive regulation of MAP kinase activity                     | 4 | 4.08163265 | 0.00480701 | TGFB1, HTR2A, TNF, EGFR                  | 98 | 59  | 16792 | 11.616742 | 0.9998918 | 0.04276655 | 0.03759846 |
| GOTERM_BP_DIRECT | positive regulation of epithelial cell proliferation           | 4 | 4.08163265 | 0.00503905 | IL6, TGFB1, MYC, EGFR                    | 98 | 60  | 16792 | 11.423129 | 0.9999304 | 0.04441392 | 0.03904675 |
| GOTERM_BP_DIRECT | positive regulation of T cell proliferation                    | 4 | 4.08163265 | 0.00503905 | IL6, VCAM1, IFNG, IL1B                   | 98 | 60  | 16792 | 11.423129 | 0.9999304 | 0.04441392 | 0.03904675 |
| GOTERM_BP_DIRECT | negative regulation of protein                                 | 4 | 4.08163265 | 0.00527774 | TGFB1, IGFBP3, PTEN, XDH                 | 98 | 61  | 16792 | 11.235865 | 0.9999558 | 0.04542254 | 0.03993348 |
| GOTERM_BP_DIRECT | response to stress                                             | 4 | 4.08163265 | 0.00527774 | HSP90AA1, MAPK8, AHSA1, EGFR             | 98 | 61  | 16792 | 11.235865 | 0.9999558 | 0.04542254 | 0.03993348 |
| GOTERM_BP_DIRECT | positive regulation of protein export from nucleus             | 3 | 3.06122449 | 0.0052973  | GSK3B, IL1B, TP53                        | 98 | 19  | 16792 | 27.05478  | 0.9999575 | 0.04542254 | 0.03993348 |

|                  |                                                                                   |    |            |            |                                                                  |    |     |       |           |           |            |            |
|------------------|-----------------------------------------------------------------------------------|----|------------|------------|------------------------------------------------------------------|----|-----|-------|-----------|-----------|------------|------------|
| GOTERM_BP_DIRECT | temperature homeostasis                                                           | 3  | 3.06122449 | 0.0052973  | ADRB1, DRD1, HTR2A                                               | 98 | 19  | 16792 | 27.05478  | 0.9999575 | 0.04542254 | 0.03993348 |
| GOTERM_BP_DIRECT | positive regulation of synaptic transmission, glutamatergic                       | 3  | 3.06122449 | 0.0052973  | DRD1, PTGS2, EGFR                                                | 98 | 19  | 16792 | 27.05478  | 0.9999575 | 0.04542254 | 0.03993348 |
| GOTERM_BP_DIRECT | positive regulation of osteoclast differentiation                                 | 3  | 3.06122449 | 0.0052973  | IFNG, FOS, TNF                                                   | 98 | 19  | 16792 | 27.05478  | 0.9999575 | 0.04542254 | 0.03993348 |
| GOTERM_BP_DIRECT | extracellular matrix organization                                                 | 6  | 6.12244898 | 0.00557755 | COL3A1, VCAM1, SERPINE1, SPP1, TNF, ICAM1                        | 98 | 196 | 16792 | 5.2453145 | 0.9999751 | 0.04761017 | 0.04185675 |
| GOTERM_BP_DIRECT | regulation of inflammatory response                                               | 4  | 4.08163265 | 0.00577529 | PTGS2, SELE, ESR1, RELA                                          | 98 | 63  | 16792 | 10.879171 | 0.9999829 | 0.04907704 | 0.04314636 |
| GOTERM_BP_DIRECT | decidualization                                                                   | 3  | 3.06122449 | 0.00586385 | SPP1, PTGS2, PPARD                                               | 98 | 20  | 16792 | 25.702041 | 0.9999855 | 0.04960711 | 0.04361237 |
| GOTERM_BP_DIRECT | negative regulation of transforming growth factor beta receptor signaling pathway | 4  | 4.08163265 | 0.00603425 | TGFB1, HSPA5, CAV1, SIRT1                                        | 98 | 64  | 16792 | 10.709184 | 0.9999896 | 0.0508218  | 0.04468028 |
| GOTERM_BP_DIRECT | regulation of blood pressure                                                      | 4  | 4.08163265 | 0.00630006 | HMOX1, PPARG, PTGS2, SOD1                                        | 98 | 65  | 16792 | 10.544427 | 0.9999937 | 0.05282573 | 0.04644204 |
| GOTERM_BP_DIRECT | positive regulation of NF-kappaB import into nucleus                              | 3  | 3.06122449 | 0.00645684 | IL1B, PTGS2, TNF                                                 | 98 | 21  | 16792 | 24.478134 | 0.9999953 | 0.05366539 | 0.04718024 |
| GOTERM_BP_DIRECT | fibrinolysis                                                                      | 3  | 3.06122449 | 0.00645684 | PLAU, SERPINE1, F2                                               | 98 | 21  | 16792 | 24.478134 | 0.9999953 | 0.05366539 | 0.04718024 |
| GOTERM_BP_DIRECT | neutrophil chemotaxis                                                             | 4  | 4.08163265 | 0.00657277 | CXCL8, IFNG, IL1B, CCL2                                          | 98 | 66  | 16792 | 10.384663 | 0.9999963 | 0.05415388 | 0.04760969 |
| GOTERM_BP_DIRECT | phospholipase C-activating G-protein coupled receptor signaling pathway           | 4  | 4.08163265 | 0.00657277 | OPRD1, HTR2A, OPRM1, ESR1                                        | 98 | 66  | 16792 | 10.384663 | 0.9999963 | 0.05415388 | 0.04760969 |
| GOTERM_BP_DIRECT | response to insulin                                                               | 4  | 4.08163265 | 0.00685242 | IL6, PPARA, SIRT1, RELA                                          | 98 | 67  | 16792 | 10.229668 | 0.9999978 | 0.05621353 | 0.04942045 |
| GOTERM_BP_DIRECT | positive regulation of protein complex assembly                                   | 3  | 3.06122449 | 0.00707595 | GSK3B, TGFB1, TNF                                                | 98 | 22  | 16792 | 23.365492 | 0.9999986 | 0.05779711 | 0.05081265 |
| GOTERM_BP_DIRECT | response to glucose                                                               | 4  | 4.08163265 | 0.00713905 | TGFB1, CASP3, PTEN, PPARD                                        | 98 | 68  | 16792 | 10.079232 | 0.9999987 | 0.05781408 | 0.05082758 |
| GOTERM_BP_DIRECT | cholesterol metabolic process                                                     | 4  | 4.08163265 | 0.00713905 | RXRA, PON1, LDLR, PPARD                                          | 98 | 68  | 16792 | 10.079232 | 0.9999987 | 0.05781408 | 0.05082758 |
| GOTERM_BP_DIRECT | oxidation-reduction process                                                       | 10 | 10.2040816 | 0.00721083 | NQO1, VCAM1, NOS2, CYP1A1, CYP1B1, CYP3A4, PTGS2, MPO, XDH, SOD1 | 98 | 592 | 16792 | 2.894374  | 0.9999989 | 0.05814694 | 0.05112021 |
| GOTERM_BP_DIRECT | positive regulation of collagen biosynthetic process                              | 3  | 3.06122449 | 0.00772087 | TGFB1, CCL2, F2                                                  | 98 | 23  | 16792 | 22.349601 | 0.9999996 | 0.06106188 | 0.0536829  |
| GOTERM_BP_DIRECT | release of cytochrome c from mitochondria                                         | 3  | 3.06122449 | 0.00772087 | JUN, BCL2, BAX                                                   | 98 | 23  | 16792 | 22.349601 | 0.9999996 | 0.06106188 | 0.0536829  |
| GOTERM_BP_DIRECT | response to bacterium                                                             | 3  | 3.06122449 | 0.00772087 | NOS2, CAV1, CCL2                                                 | 98 | 23  | 16792 | 22.349601 | 0.9999996 | 0.06106188 | 0.0536829  |
| GOTERM_BP_DIRECT | Ras protein signal transduction                                                   | 4  | 4.08163265 | 0.00773343 | CDKN1A, JUN, MAPK14, TP53                                        | 98 | 70  | 16792 | 9.7912536 | 0.9999996 | 0.06106188 | 0.0536829  |
| GOTERM_BP_DIRECT | cellular response to retinoic acid                                                | 4  | 4.08163265 | 0.00773343 | MYC, CCL2, PPARG, SLC6A4                                         | 98 | 70  | 16792 | 9.7912536 | 0.9999996 | 0.06106188 | 0.0536829  |
| GOTERM_BP_DIRECT | chemokine-mediated signaling pathway                                              | 4  | 4.08163265 | 0.00804126 | CXCL10, CXCL11, CXCL8, CCL2                                      | 98 | 71  | 16792 | 9.6533487 | 0.9999998 | 0.06322899 | 0.05558813 |
| GOTERM_BP_DIRECT | vascular endothelial growth factor receptor signaling pathway                     | 4  | 4.08163265 | 0.00835623 | HSP90AA1, HSPB1, CCL2, MAPK14                                    | 98 | 72  | 16792 | 9.5192744 | 0.9999999 | 0.06543412 | 0.05752678 |
| GOTERM_BP_DIRECT | positive regulation of inflammatory response                                      | 4  | 4.08163265 | 0.00867838 | SERPINE1, CCL2, LDLR, EGFR                                       | 98 | 73  | 16792 | 9.3888734 | 0.9999999 | 0.06767708 | 0.05949869 |
| GOTERM_BP_DIRECT | leukocyte cell-cell adhesion                                                      | 3  | 3.06122449 | 0.00908689 | VCAM1, SELE, ICAM1                                               | 98 | 25  | 16792 | 20.561633 | 1         | 0.06999858 | 0.06153965 |

|                  |                                                                        |   |            |            |                               |    |     |       |           |   |            |            |
|------------------|------------------------------------------------------------------------|---|------------|------------|-------------------------------|----|-----|-------|-----------|---|------------|------------|
| GOTERM_BP_DIRECT | negative regulation of G1/S transition of mitotic cell cycle           | 3 | 3.06122449 | 0.00908689 | CDKN1A, PTEN, BCL2            | 98 | 25  | 16792 | 20.561633 | 1 | 0.06999858 | 0.06153965 |
| GOTERM_BP_DIRECT | nucleotide-binding oligomerization domain containing signaling pathway | 3 | 3.06122449 | 0.00908689 | IKBKB, CASP8, CHUK            | 98 | 25  | 16792 | 20.561633 | 1 | 0.06999858 | 0.06153965 |
| GOTERM_BP_DIRECT | activation of phospholipase C activity                                 | 3 | 3.06122449 | 0.00980737 | HTR2A, SELE, EGFR             | 98 | 26  | 16792 | 19.770801 | 1 | 0.07463838 | 0.06561876 |
| GOTERM_BP_DIRECT | positive regulation of interleukin-8                                   | 3 | 3.06122449 | 0.00980737 | IL1B, SERPINE1, TNF           | 98 | 26  | 16792 | 19.770801 | 1 | 0.07463838 | 0.06561876 |
| GOTERM_BP_DIRECT | positive regulation of mitotic nuclear                                 | 3 | 3.06122449 | 0.00980737 | IL1A, IL1B, INSR              | 98 | 26  | 16792 | 19.770801 | 1 | 0.07463838 | 0.06561876 |
| GOTERM_BP_DIRECT | T cell receptor signaling pathway                                      | 5 | 5.10204082 | 0.01066292 | IKBKB, IFNG, CHUK, PTEN, RELA | 98 | 148 | 16792 | 5.7887479 | 1 | 0.08082494 | 0.0710577  |
| GOTERM_BP_DIRECT | viral entry into host                                                  | 4 | 4.08163265 | 0.01113714 | DPP4, HTR2A, LDLR, ICAM1      | 98 | 80  | 16792 | 8.5673469 | 1 | 0.08332282 | 0.07325373 |
| GOTERM_BP_DIRECT | ossification                                                           | 4 | 4.08163265 | 0.01113714 | BCL2, SPP1, MMP9, EGFR        | 98 | 80  | 16792 | 8.5673469 | 1 | 0.08332282 | 0.07325373 |
| GOTERM_BP_DIRECT | TRIF-dependent toll-like receptor signaling pathway                    | 3 | 3.06122449 | 0.01132174 | IKBKB, CASP8, CHUK            | 98 | 28  | 16792 | 18.358601 | 1 | 0.08332282 | 0.07325373 |
| GOTERM_BP_DIRECT | negative regulation of endothelial cell apoptotic process              | 3 | 3.06122449 | 0.01132174 | SERPINE1, ICAM1, NFE2L2       | 98 | 28  | 16792 | 18.358601 | 1 | 0.08332282 | 0.07325373 |
| GOTERM_BP_DIRECT | positive regulation of release of cytochrome c from mitochondria       | 3 | 3.06122449 | 0.01132174 | BAX, TP53, MMP9               | 98 | 28  | 16792 | 18.358601 | 1 | 0.08332282 | 0.07325373 |
| GOTERM_BP_DIRECT | positive regulation of catalytic activity                              | 4 | 4.08163265 | 0.01151784 | CAV1, IGFBP3, BCL2, SOD1      | 98 | 81  | 16792 | 8.4615772 | 1 | 0.08332282 | 0.07325373 |
| GOTERM_BP_DIRECT | positive regulation of MAPK cascade                                    | 4 | 4.08163265 | 0.01151784 | IL6, INSR, IGFBP3, ADRB2      | 98 | 81  | 16792 | 8.4615772 | 1 | 0.08332282 | 0.07325373 |
| GOTERM_BP_DIRECT | positive regulation of translational initiation by iron                | 2 | 2.04081633 | 0.01152009 | RXRA, TNF                     | 98 | 2   | 16792 | 171.34694 | 1 | 0.08332282 | 0.07325373 |
| GOTERM_BP_DIRECT | negative regulation of synaptic transmission, dopaminergic             | 2 | 2.04081633 | 0.01152009 | PTGS2, SLC6A4                 | 98 | 2   | 16792 | 171.34694 | 1 | 0.08332282 | 0.07325373 |
| GOTERM_BP_DIRECT | positive regulation of vitamin D biosynthetic process                  | 2 | 2.04081633 | 0.01152009 | IFNG, TNF                     | 98 | 2   | 16792 | 171.34694 | 1 | 0.08332282 | 0.07325373 |
| GOTERM_BP_DIRECT | regulation of nitrogen utilization                                     | 2 | 2.04081633 | 0.01152009 | BCL2, BAX                     | 98 | 2   | 16792 | 171.34694 | 1 | 0.08332282 | 0.07325373 |
| GOTERM_BP_DIRECT | positive regulation of leukocyte mediated cytotoxicity                 | 2 | 2.04081633 | 0.01152009 | NOS2, CCL2                    | 98 | 2   | 16792 | 171.34694 | 1 | 0.08332282 | 0.07325373 |
| GOTERM_BP_DIRECT | behavioral fear response                                               | 3 | 3.06122449 | 0.01211504 | DPP4, BCL2, DRD1              | 98 | 29  | 16792 | 17.725545 | 1 | 0.08663393 | 0.07616471 |
| GOTERM_BP_DIRECT | negative regulation of insulin receptor signaling pathway              | 3 | 3.06122449 | 0.01211504 | PTPN1, IL1B, RELA             | 98 | 29  | 16792 | 17.725545 | 1 | 0.08663393 | 0.07616471 |
| GOTERM_BP_DIRECT | negative regulation of endothelial cell proliferation                  | 3 | 3.06122449 | 0.01211504 | STAT1, CAV1, XDH              | 98 | 29  | 16792 | 17.725545 | 1 | 0.08663393 | 0.07616471 |
| GOTERM_BP_DIRECT | canonical Wnt signaling pathway                                        | 4 | 4.08163265 | 0.01230161 | GSK3B, CCND1, MYC, PTEN       | 98 | 83  | 16792 | 8.2576838 | 1 | 0.08763738 | 0.0770469  |
| GOTERM_BP_DIRECT | locomotory behavior                                                    | 4 | 4.08163265 | 0.01270471 | PTEN, OPRM1, SLC6A3, SOD1     | 98 | 84  | 16792 | 8.159378  | 1 | 0.08983366 | 0.07897777 |

|                  |                                                                                              |   |            |            |                                   |    |     |       |           |   |            |            |
|------------------|----------------------------------------------------------------------------------------------|---|------------|------------|-----------------------------------|----|-----|-------|-----------|---|------------|------------|
| GOTERM_BP_DIRECT | positive regulation of cell growth                                                           | 4 | 4.08163265 | 0.01270471 | BCL2, AKT1, F2, EGFR              | 98 | 84  | 16792 | 8.159378  | 1 | 0.08983366 | 0.07897777 |
| GOTERM_BP_DIRECT | intrinsic apoptotic signaling pathway                                                        | 3 | 3.06122449 | 0.01293201 | CDKN1A, BAX, TP53                 | 98 | 30  | 16792 | 17.134694 | 1 | 0.09076353 | 0.07979527 |
| GOTERM_BP_DIRECT | cellular response to fibroblast growth factor stimulus                                       | 3 | 3.06122449 | 0.01293201 | CXCL8, MYC, CCL2                  | 98 | 30  | 16792 | 17.134694 | 1 | 0.09076353 | 0.07979527 |
| GOTERM_BP_DIRECT | lipid metabolic process                                                                      | 5 | 5.10204082 | 0.01301624 | PPARG, CYP3A4, PPARA, LDLR, PPARD | 98 | 157 | 16792 | 5.4569089 | 1 | 0.09101759 | 0.08001863 |
| GOTERM_BP_DIRECT | intrinsic apoptotic signaling pathway in response to DNA damage by p53 class mediator        | 3 | 3.06122449 | 0.01377236 | CDKN1A, SIRT1, TP53               | 98 | 31  | 16792 | 16.581962 | 1 | 0.09559934 | 0.0840467  |
| GOTERM_BP_DIRECT | cellular response to estradiol stimulus                                                      | 3 | 3.06122449 | 0.01377236 | IL6, ESR1, EGFR                   | 98 | 31  | 16792 | 16.581962 | 1 | 0.09559934 | 0.0840467  |
| GOTERM_BP_DIRECT | negative regulation of protein catabolic process                                             | 3 | 3.06122449 | 0.0146358  | NOS2, RELA, EGFR                  | 98 | 32  | 16792 | 16.063776 | 1 | 0.10085398 | 0.08866635 |
| GOTERM_BP_DIRECT | response to cocaine                                                                          | 3 | 3.06122449 | 0.0146358  | HSP90AA1, OPRM1, SLC6A3           | 98 | 32  | 16792 | 16.063776 | 1 | 0.10085398 | 0.08866635 |
| GOTERM_BP_DIRECT | female pregnancy                                                                             | 4 | 4.08163265 | 0.01483322 | THBD, TGFB1, BCL2, FOS            | 98 | 89  | 16792 | 7.700986  | 1 | 0.10184404 | 0.08953677 |
| GOTERM_BP_DIRECT | intrinsic apoptotic signaling pathway in response to endoplasmic reticulum stress            | 3 | 3.06122449 | 0.01552204 | GSK3B, BCL2, BAX                  | 98 | 33  | 16792 | 15.576994 | 1 | 0.10505098 | 0.09235617 |
| GOTERM_BP_DIRECT | response to interleukin-1                                                                    | 3 | 3.06122449 | 0.01552204 | PRKCA, SELE, RELA                 | 98 | 33  | 16792 | 15.576994 | 1 | 0.10505098 | 0.09235617 |
| GOTERM_BP_DIRECT | glucose transport                                                                            | 3 | 3.06122449 | 0.01552204 | AKT1, SLC2A4, PPARD               | 98 | 33  | 16792 | 15.576994 | 1 | 0.10505098 | 0.09235617 |
| GOTERM_BP_DIRECT | cellular response to epidermal growth factor stimulus                                        | 3 | 3.06122449 | 0.01552204 | MYC, AKT1, EGFR                   | 98 | 33  | 16792 | 15.576994 | 1 | 0.10505098 | 0.09235617 |
| GOTERM_BP_DIRECT | positive regulation of cell cycle                                                            | 3 | 3.06122449 | 0.0164308  | CCND1, MYC, SLC6A4                | 98 | 34  | 16792 | 15.118848 | 1 | 0.11080559 | 0.09741536 |
| GOTERM_BP_DIRECT | cellular calcium ion homeostasis                                                             | 4 | 4.08163265 | 0.01667264 | TGFB1, CAV1, CCL2, HTR2A          | 98 | 93  | 16792 | 7.3697608 | 1 | 0.11106239 | 0.09764113 |
| GOTERM_BP_DIRECT | response to cobalamin                                                                        | 2 | 2.04081633 | 0.01723079 | RELA, EGFR                        | 98 | 3   | 16792 | 114.23129 | 1 | 0.11106239 | 0.09764113 |
| GOTERM_BP_DIRECT | vasodilation by norepinephrine-epinephrine involved in regulation of systemic arterial blood | 2 | 2.04081633 | 0.01723079 | ADRB1, ADRB2                      | 98 | 3   | 16792 | 114.23129 | 1 | 0.11106239 | 0.09764113 |
| GOTERM_BP_DIRECT | negative regulation of helicase activity                                                     | 2 | 2.04081633 | 0.01723079 | SIRT1, TP53                       | 98 | 3   | 16792 | 114.23129 | 1 | 0.11106239 | 0.09764113 |
| GOTERM_BP_DIRECT | negative regulation of receptor biosynthetic process                                         | 2 | 2.04081633 | 0.01723079 | PPARG, PPARA                      | 98 | 3   | 16792 | 114.23129 | 1 | 0.11106239 | 0.09764113 |
| GOTERM_BP_DIRECT | heat generation                                                                              | 2 | 2.04081633 | 0.01723079 | ADRB1, ADRB2                      | 98 | 3   | 16792 | 114.23129 | 1 | 0.11106239 | 0.09764113 |
| GOTERM_BP_DIRECT | positive regulation of killing of cells of other organism                                    | 2 | 2.04081633 | 0.01723079 | IFNG, NOS2                        | 98 | 3   | 16792 | 114.23129 | 1 | 0.11106239 | 0.09764113 |
| GOTERM_BP_DIRECT | positive regulation of cyclase activity                                                      | 2 | 2.04081633 | 0.01723079 | MAPK8, MAPK14                     | 98 | 3   | 16792 | 114.23129 | 1 | 0.11106239 | 0.09764113 |
| GOTERM_BP_DIRECT | neutrophil apoptotic process                                                                 | 2 | 2.04081633 | 0.01723079 | IL6, IFNG                         | 98 | 3   | 16792 | 114.23129 | 1 | 0.11106239 | 0.09764113 |
| GOTERM_BP_DIRECT | cellular response to prolactin                                                               | 2 | 2.04081633 | 0.01723079 | IL6, MYC                          | 98 | 3   | 16792 | 114.23129 | 1 | 0.11106239 | 0.09764113 |

|                  |                                                                                           |   |            |            |                              |    |     |       |           |   |            |            |
|------------------|-------------------------------------------------------------------------------------------|---|------------|------------|------------------------------|----|-----|-------|-----------|---|------------|------------|
| GOTERM_BP_DIRECT | fever generation                                                                          | 2 | 2.04081633 | 0.01723079 | IL1A, IL1B                   | 98 | 3   | 16792 | 114.23129 | 1 | 0.11106239 | 0.09764113 |
| GOTERM_BP_DIRECT | transformation of host cell by virus                                                      | 2 | 2.04081633 | 0.01723079 | MYC, INSR                    | 98 | 3   | 16792 | 114.23129 | 1 | 0.11106239 | 0.09764113 |
| GOTERM_BP_DIRECT | positive regulation of cellular extravasation                                             | 2 | 2.04081633 | 0.01723079 | CCL2, ICAM1                  | 98 | 3   | 16792 | 114.23129 | 1 | 0.11106239 | 0.09764113 |
| GOTERM_BP_DIRECT | digestive tract development                                                               | 3 | 3.06122449 | 0.01736179 | COL3A1, TGFB1, CYP1A1        | 98 | 35  | 16792 | 14.68688  | 1 | 0.11115065 | 0.09771873 |
| GOTERM_BP_DIRECT | placenta development                                                                      | 3 | 3.06122449 | 0.01736179 | PPARG, MAPK14, SOD1          | 98 | 35  | 16792 | 14.68688  | 1 | 0.11115065 | 0.09771873 |
| GOTERM_BP_DIRECT | negative regulation of cell migration                                                     | 4 | 4.08163265 | 0.01763819 | SERPINE1, PTEN, BCL2, CYP1B1 | 98 | 95  | 16792 | 7.2146079 | 1 | 0.11253995 | 0.09894013 |
| GOTERM_BP_DIRECT | learning or memory                                                                        | 3 | 3.06122449 | 0.01831473 | CASP3, PTEN, EGFR            | 98 | 36  | 16792 | 14.278912 | 1 | 0.11646446 | 0.10239039 |
| GOTERM_BP_DIRECT | negative regulation of protein kinase B signaling                                         | 3 | 3.06122449 | 0.01928933 | PTEN, SIRT1, XDH             | 98 | 37  | 16792 | 13.892995 | 1 | 0.1222518  | 0.10747836 |
| GOTERM_BP_DIRECT | regulation of gene expression                                                             | 4 | 4.08163265 | 0.02018633 | MYC, BCL2, AHR, F2           | 98 | 100 | 16792 | 6.8538776 | 1 | 0.12728711 | 0.11190518 |
| GOTERM_BP_DIRECT | ERBB2 signaling pathway                                                                   | 3 | 3.06122449 | 0.02028533 | HSP90AA1, AKT1, EGFR         | 98 | 38  | 16792 | 13.52739  | 1 | 0.12728711 | 0.11190518 |
| GOTERM_BP_DIRECT | extrinsic apoptotic signaling pathway via death domain                                    | 3 | 3.06122449 | 0.02028533 | BCL2, BAX, TNF               | 98 | 38  | 16792 | 13.52739  | 1 | 0.12728711 | 0.11190518 |
| GOTERM_BP_DIRECT | acute-phase response                                                                      | 3 | 3.06122449 | 0.02130245 | CRP, IL6, F2                 | 98 | 39  | 16792 | 13.180534 | 1 | 0.1332282  | 0.11712833 |
| GOTERM_BP_DIRECT | blood coagulation                                                                         | 5 | 5.10204082 | 0.0219729  | THBD, PLA2, IRF1, F2, F3     | 98 | 184 | 16792 | 4.6561668 | 1 | 0.1369692  | 0.12041725 |
| GOTERM_BP_DIRECT | positive regulation of cysteine-type endopeptidase activity involved in apoptotic process | 3 | 3.06122449 | 0.02234042 | MYC, SIRT1, TNF              | 98 | 40  | 16792 | 12.85102  | 1 | 0.1378166  | 0.12116225 |
| GOTERM_BP_DIRECT | sequestering of triglyceride                                                              | 2 | 2.04081633 | 0.02290883 | IL1B, TNF                    | 98 | 4   | 16792 | 85.673469 | 1 | 0.1378166  | 0.12116225 |
| GOTERM_BP_DIRECT | regulation of vascular endothelial growth factor production                               | 2 | 2.04081633 | 0.02290883 | IL6, CCL2                    | 98 | 4   | 16792 | 85.673469 | 1 | 0.1378166  | 0.12116225 |
| GOTERM_BP_DIRECT | connective tissue replacement involved in inflammatory response wound                     | 2 | 2.04081633 | 0.02290883 | IL1A, TGFB1                  | 98 | 4   | 16792 | 85.673469 | 1 | 0.1378166  | 0.12116225 |
| GOTERM_BP_DIRECT | negative regulation of smooth muscle contraction                                          | 2 | 2.04081633 | 0.02290883 | ADRB2, PTGS2                 | 98 | 4   | 16792 | 85.673469 | 1 | 0.1378166  | 0.12116225 |
| GOTERM_BP_DIRECT | positive regulation of mononuclear cell migration                                         | 2 | 2.04081633 | 0.02290883 | TGFB1, TNF                   | 98 | 4   | 16792 | 85.673469 | 1 | 0.1378166  | 0.12116225 |
| GOTERM_BP_DIRECT | positive regulation of cell adhesion molecule production                                  | 2 | 2.04081633 | 0.02290883 | IL1B, CAV1                   | 98 | 4   | 16792 | 85.673469 | 1 | 0.1378166  | 0.12116225 |
| GOTERM_BP_DIRECT | negative regulation of extracellular matrix disassembly                                   | 2 | 2.04081633 | 0.02290883 | DPP4, TGFB1                  | 98 | 4   | 16792 | 85.673469 | 1 | 0.1378166  | 0.12116225 |
| GOTERM_BP_DIRECT | regulation of cytokine production involved in inflammatory response                       | 2 | 2.04081633 | 0.02290883 | NOS2, MAPK14                 | 98 | 4   | 16792 | 85.673469 | 1 | 0.1378166  | 0.12116225 |
| GOTERM_BP_DIRECT | negative regulation of bicellular tight junction assembly                                 | 2 | 2.04081633 | 0.02290883 | IKKB, TNF                    | 98 | 4   | 16792 | 85.673469 | 1 | 0.1378166  | 0.12116225 |

|                  |                                                                             |   |            |            |                                                 |    |     |       |           |   |            |            |
|------------------|-----------------------------------------------------------------------------|---|------------|------------|-------------------------------------------------|----|-----|-------|-----------|---|------------|------------|
| GOTERM_BP_DIRECT | regulation of protein import into nucleus, translocation                    | 2 | 2.04081633 | 0.02290883 | CDKN1A, SIRT1                                   | 98 | 4   | 16792 | 85.673469 | 1 | 0.1378166  | 0.12116225 |
| GOTERM_BP_DIRECT | cellular iron ion homeostasis                                               | 3 | 3.06122449 | 0.02669539 | MYC, HMOX1, SOD1                                | 98 | 44  | 16792 | 11.682746 | 1 | 0.16008785 | 0.14074214 |
| GOTERM_BP_DIRECT | regulation of entry of bacterium into host                                  | 2 | 2.04081633 | 0.0285544  | CXCL8, CAV1                                     | 98 | 5   | 16792 | 68.538776 | 1 | 0.1680453  | 0.14773798 |
| GOTERM_BP_DIRECT | glial cell apoptotic process                                                | 2 | 2.04081633 | 0.0285544  | CASP9, CASP3                                    | 98 | 5   | 16792 | 68.538776 | 1 | 0.1680453  | 0.14773798 |
| GOTERM_BP_DIRECT | membrane to membrane docking                                                | 2 | 2.04081633 | 0.0285544  | VCAM1, ICAM1                                    | 98 | 5   | 16792 | 68.538776 | 1 | 0.1680453  | 0.14773798 |
| GOTERM_BP_DIRECT | negative regulation of myosin-light-chain-phosphatase activity              | 2 | 2.04081633 | 0.0285544  | IKBKB, TNF                                      | 98 | 5   | 16792 | 68.538776 | 1 | 0.1680453  | 0.14773798 |
| GOTERM_BP_DIRECT | chemical synaptic transmission, postsynaptic                                | 2 | 2.04081633 | 0.0285544  | GSK3B, AKT1                                     | 98 | 5   | 16792 | 68.538776 | 1 | 0.1680453  | 0.14773798 |
| GOTERM_BP_DIRECT | negative regulation of sequestering of triglyceride                         | 2 | 2.04081633 | 0.0285544  | PPARG, PPARA                                    | 98 | 5   | 16792 | 68.538776 | 1 | 0.1680453  | 0.14773798 |
| GOTERM_BP_DIRECT | intracellular signal transduction                                           | 7 | 7.14285714 | 0.02929791 | GSK3B, CXCL8, HSPB1, HMOX1, AKT1, PRKCA, MAPK14 | 98 | 403 | 16792 | 2.9762496 | 1 | 0.17188711 | 0.15111553 |
| GOTERM_BP_DIRECT | T cell activation                                                           | 3 | 3.06122449 | 0.03016754 | DPP4, PPP3CA, CASP8                             | 98 | 47  | 16792 | 10.937039 | 1 | 0.17536037 | 0.15416907 |
| GOTERM_BP_DIRECT | positive regulation of cell division                                        | 3 | 3.06122449 | 0.03016754 | IL1A, TGFB1, IL1B                               | 98 | 47  | 16792 | 10.937039 | 1 | 0.17536037 | 0.15416907 |
| GOTERM_BP_DIRECT | organ regeneration                                                          | 3 | 3.06122449 | 0.03016754 | CDKN1A, CCL2, PPARG                             | 98 | 47  | 16792 | 10.937039 | 1 | 0.17536037 | 0.15416907 |
| GOTERM_BP_DIRECT | cellular protein metabolic process                                          | 4 | 4.08163265 | 0.03095271 | MMP1, MMP2, IGFBP3, F2                          | 98 | 118 | 16792 | 5.8083708 | 1 | 0.17937429 | 0.15769792 |
| GOTERM_BP_DIRECT | regulation of circadian rhythm                                              | 3 | 3.06122449 | 0.03257651 | MAPK8, PPARG, PPARA                             | 98 | 49  | 16792 | 10.490629 | 1 | 0.18820879 | 0.16546482 |
| GOTERM_BP_DIRECT | heterophilic cell-cell adhesion via plasma membrane cell adhesion molecules | 3 | 3.06122449 | 0.0338085  | VCAM1, SELE, ICAM1                              | 98 | 50  | 16792 | 10.280816 | 1 | 0.19156142 | 0.16841231 |
| GOTERM_BP_DIRECT | negative regulation of cholesterol storage                                  | 2 | 2.04081633 | 0.03416768 | PPARG, PPARA                                    | 98 | 6   | 16792 | 57.115646 | 1 | 0.19156142 | 0.16841231 |
| GOTERM_BP_DIRECT | positive regulation of fatty acid oxidation                                 | 2 | 2.04081633 | 0.03416768 | PPARG, PPARA                                    | 98 | 6   | 16792 | 57.115646 | 1 | 0.19156142 | 0.16841231 |
| GOTERM_BP_DIRECT | maternal process involved in parturition                                    | 2 | 2.04081633 | 0.03416768 | CYP1A1, CCL2                                    | 98 | 6   | 16792 | 57.115646 | 1 | 0.19156142 | 0.16841231 |
| GOTERM_BP_DIRECT | positive regulation of cAMP metabolic process                               | 2 | 2.04081633 | 0.03416768 | CXCL10, CXCL11                                  | 98 | 6   | 16792 | 57.115646 | 1 | 0.19156142 | 0.16841231 |
| GOTERM_BP_DIRECT | positive regulation of exit from mitosis                                    | 2 | 2.04081633 | 0.03416768 | TGFB1, BIRC5                                    | 98 | 6   | 16792 | 57.115646 | 1 | 0.19156142 | 0.16841231 |
| GOTERM_BP_DIRECT | positive regulation of brown fat cell differentiation                       | 2 | 2.04081633 | 0.03416768 | MAPK14, PTGS2                                   | 98 | 6   | 16792 | 57.115646 | 1 | 0.19156142 | 0.16841231 |
| GOTERM_BP_DIRECT | conditioned taste aversion                                                  | 2 | 2.04081633 | 0.03416768 | FOS, DRD1                                       | 98 | 6   | 16792 | 57.115646 | 1 | 0.19156142 | 0.16841231 |
| GOTERM_BP_DIRECT | lipid hydroxylation                                                         | 2 | 2.04081633 | 0.03416768 | CYP1A1, CYP3A4                                  | 98 | 6   | 16792 | 57.115646 | 1 | 0.19156142 | 0.16841231 |
| GOTERM_BP_DIRECT | epithelial cell proliferation involved in salivary gland morphogenesis      | 2 | 2.04081633 | 0.03416768 | IL6, TNF                                        | 98 | 6   | 16792 | 57.115646 | 1 | 0.19156142 | 0.16841231 |

|                  |                                                                  |   |            |            |                           |    |     |       |           |   |            |            |
|------------------|------------------------------------------------------------------|---|------------|------------|---------------------------|----|-----|-------|-----------|---|------------|------------|
| GOTERM_BP_DIRECT | sensory perception of pain                                       | 3 | 3.06122449 | 0.03632627 | OPRD1, OPRM1, PTGS2       | 98 | 52  | 16792 | 9.8854003 | 1 | 0.20246555 | 0.17799874 |
| GOTERM_BP_DIRECT | regulation of protein localization                               | 3 | 3.06122449 | 0.03632627 | MAPK8, BCL2, AKT1         | 98 | 52  | 16792 | 9.8854003 | 1 | 0.20246555 | 0.17799874 |
| GOTERM_BP_DIRECT | protein dephosphorylation                                        | 4 | 4.08163265 | 0.03653373 | PTPN1, PPP3CA, PTEN, BCL2 | 98 | 126 | 16792 | 5.4395854 | 1 | 0.20302469 | 0.1784903  |
| GOTERM_BP_DIRECT | dopamine transport                                               | 2 | 2.04081633 | 0.03974887 | DRD1, SLC6A3              | 98 | 7   | 16792 | 48.956268 | 1 | 0.21398893 | 0.18812958 |
| GOTERM_BP_DIRECT | peroxisome proliferator activated receptor signaling             | 2 | 2.04081633 | 0.03974887 | RXRA, PPARG               | 98 | 7   | 16792 | 48.956268 | 1 | 0.21398893 | 0.18812958 |
| GOTERM_BP_DIRECT | peripheral nervous system myelin maintenance                     | 2 | 2.04081633 | 0.03974887 | AKT1, SOD1                | 98 | 7   | 16792 | 48.956268 | 1 | 0.21398893 | 0.18812958 |
| GOTERM_BP_DIRECT | salivary gland morphogenesis                                     | 2 | 2.04081633 | 0.03974887 | TGFB1, EGFR               | 98 | 7   | 16792 | 48.956268 | 1 | 0.21398893 | 0.18812958 |
| GOTERM_BP_DIRECT | regulation of branching involved in prostate gland               | 2 | 2.04081633 | 0.03974887 | RXRA, ESR1                | 98 | 7   | 16792 | 48.956268 | 1 | 0.21398893 | 0.18812958 |
| GOTERM_BP_DIRECT | cellular response to hyperoxia                                   | 2 | 2.04081633 | 0.03974887 | CAV1, PPARG               | 98 | 7   | 16792 | 48.956268 | 1 | 0.21398893 | 0.18812958 |
| GOTERM_BP_DIRECT | response to leptin                                               | 2 | 2.04081633 | 0.03974887 | CCND1, SIRT1              | 98 | 7   | 16792 | 48.956268 | 1 | 0.21398893 | 0.18812958 |
| GOTERM_BP_DIRECT | negative regulation of myelination                               | 2 | 2.04081633 | 0.03974887 | IFNG, PTEN                | 98 | 7   | 16792 | 48.956268 | 1 | 0.21398893 | 0.18812958 |
| GOTERM_BP_DIRECT | negative regulation of glial cell apoptotic process              | 2 | 2.04081633 | 0.03974887 | CCL2, PRKCA               | 98 | 7   | 16792 | 48.956268 | 1 | 0.21398893 | 0.18812958 |
| GOTERM_BP_DIRECT | positive regulation of monocyte chemotactic protein-1 production | 2 | 2.04081633 | 0.03974887 | IL1A, IL1B                | 98 | 7   | 16792 | 48.956268 | 1 | 0.21398893 | 0.18812958 |
| GOTERM_BP_DIRECT | regulation of protein homodimerization activity                  | 2 | 2.04081633 | 0.03974887 | BCL2, BAX                 | 98 | 7   | 16792 | 48.956268 | 1 | 0.21398893 | 0.18812958 |
| GOTERM_BP_DIRECT | defense response to Gram-negative bacterium                      | 3 | 3.06122449 | 0.04023375 | IL6, NOS2, SERPINE1       | 98 | 55  | 16792 | 9.3461967 | 1 | 0.21598574 | 0.18988509 |
| GOTERM_BP_DIRECT | negative regulation of epithelial cell proliferation             | 3 | 3.06122449 | 0.04157018 | TGFB1, PTEN, PPARD        | 98 | 56  | 16792 | 9.1793003 | 1 | 0.22190279 | 0.1950871  |
| GOTERM_BP_DIRECT | cell growth                                                      | 3 | 3.06122449 | 0.04157018 | IL6, TGFB1, BCL2          | 98 | 56  | 16792 | 9.1793003 | 1 | 0.22190279 | 0.1950871  |
| GOTERM_BP_DIRECT | cellular response to interferon-gamma                            | 3 | 3.06122449 | 0.04292318 | NOS2, MYC, CCL2           | 98 | 57  | 16792 | 9.0182599 | 1 | 0.22720511 | 0.19974866 |
| GOTERM_BP_DIRECT | learning                                                         | 3 | 3.06122449 | 0.04292318 | JUN, DRD1, PTGS2          | 98 | 57  | 16792 | 9.0182599 | 1 | 0.22720511 | 0.19974866 |
| GOTERM_BP_DIRECT | circadian regulation of gene expression                          | 3 | 3.06122449 | 0.04292318 | AHR, PPARA, SIRT1         | 98 | 57  | 16792 | 9.0182599 | 1 | 0.22720511 | 0.19974866 |
| GOTERM_BP_DIRECT | negative regulation of platelet activation                       | 2 | 2.04081633 | 0.04529813 | THBD, F2                  | 98 | 8   | 16792 | 42.836735 | 1 | 0.22829775 | 0.20070926 |
| GOTERM_BP_DIRECT | low-density lipoprotein particle clearance                       | 2 | 2.04081633 | 0.04529813 | HMOX1, LDLR               | 98 | 8   | 16792 | 42.836735 | 1 | 0.22829775 | 0.20070926 |
| GOTERM_BP_DIRECT | positive regulation of IRE1-mediated unfolded protein response   | 2 | 2.04081633 | 0.04529813 | PTPN1, BAX                | 98 | 8   | 16792 | 42.836735 | 1 | 0.22829775 | 0.20070926 |
| GOTERM_BP_DIRECT | flavonoid metabolic process                                      | 2 | 2.04081633 | 0.04529813 | MYC, CYP1A1               | 98 | 8   | 16792 | 42.836735 | 1 | 0.22829775 | 0.20070926 |
| GOTERM_BP_DIRECT | amine metabolic process                                          | 2 | 2.04081633 | 0.04529813 | VCAM1, CYP1A1             | 98 | 8   | 16792 | 42.836735 | 1 | 0.22829775 | 0.20070926 |

|                  |                                                                                                                            |   |            |            |                                               |    |     |       |           |   |            |            |
|------------------|----------------------------------------------------------------------------------------------------------------------------|---|------------|------------|-----------------------------------------------|----|-----|-------|-----------|---|------------|------------|
| GOTERM_BP_DIRECT | positive regulation of ER-associated ubiquitin-dependent protein catabolic process                                         | 2 | 2.04081633 | 0.04529813 | CAV1, NFE2L2                                  | 98 | 8   | 16792 | 42.836735 | 1 | 0.22829775 | 0.20070926 |
| GOTERM_BP_DIRECT | positive regulation of MHC class II biosynthetic process                                                                   | 2 | 2.04081633 | 0.04529813 | IFNG, SIRT1                                   | 98 | 8   | 16792 | 42.836735 | 1 | 0.22829775 | 0.20070926 |
| GOTERM_BP_DIRECT | positive regulation of interleukin-6 biosynthetic process                                                                  | 2 | 2.04081633 | 0.04529813 | IFNG, IL1B                                    | 98 | 8   | 16792 | 42.836735 | 1 | 0.22829775 | 0.20070926 |
| GOTERM_BP_DIRECT | cellular response to nicotine                                                                                              | 2 | 2.04081633 | 0.04529813 | TNF, RELA                                     | 98 | 8   | 16792 | 42.836735 | 1 | 0.22829775 | 0.20070926 |
| GOTERM_BP_DIRECT | T cell chemotaxis                                                                                                          | 2 | 2.04081633 | 0.04529813 | CXCL10, CXCL11                                | 98 | 8   | 16792 | 42.836735 | 1 | 0.22829775 | 0.20070926 |
| GOTERM_BP_DIRECT | regulation of protein heterodimerization activity                                                                          | 2 | 2.04081633 | 0.04529813 | BCL2, BAX                                     | 98 | 8   | 16792 | 42.836735 | 1 | 0.22829775 | 0.20070926 |
| GOTERM_BP_DIRECT | myeloid cell homeostasis                                                                                                   | 2 | 2.04081633 | 0.04529813 | BAX, SOD1                                     | 98 | 8   | 16792 | 42.836735 | 1 | 0.22829775 | 0.20070926 |
| GOTERM_BP_DIRECT | positive regulation of cyclin-dependent protein serine/threonine kinase activity involved in G1/S transition of cell cycle | 2 | 2.04081633 | 0.04529813 | AKT1, EGFR                                    | 98 | 8   | 16792 | 42.836735 | 1 | 0.22829775 | 0.20070926 |
| GOTERM_BP_DIRECT | negative regulation of cell adhesion mediated by integrin                                                                  | 2 | 2.04081633 | 0.04529813 | SERPINE1, CYP1B1                              | 98 | 8   | 16792 | 42.836735 | 1 | 0.22829775 | 0.20070926 |
| GOTERM_BP_DIRECT | acute inflammatory response to antigenic stimulus                                                                          | 2 | 2.04081633 | 0.04529813 | OPRM1, ICAM1                                  | 98 | 8   | 16792 | 42.836735 | 1 | 0.22829775 | 0.20070926 |
| GOTERM_BP_DIRECT | monoamine transport                                                                                                        | 2 | 2.04081633 | 0.04529813 | SLC6A3, SLC6A4                                | 98 | 8   | 16792 | 42.836735 | 1 | 0.22829775 | 0.20070926 |
| GOTERM_BP_DIRECT | positive regulation of programmed cell death                                                                               | 2 | 2.04081633 | 0.04529813 | CDKN1A, TNF                                   | 98 | 8   | 16792 | 42.836735 | 1 | 0.22829775 | 0.20070926 |
| GOTERM_BP_DIRECT | death-inducing signaling complex                                                                                           | 2 | 2.04081633 | 0.04529813 | CASP8, TNF                                    | 98 | 8   | 16792 | 42.836735 | 1 | 0.22829775 | 0.20070926 |
| GOTERM_BP_DIRECT | I-kappaB kinase/NF-kappaB signaling                                                                                        | 3 | 3.06122449 | 0.04707932 | IKBKB, CHUK, TNF                              | 98 | 60  | 16792 | 8.5673469 | 1 | 0.23601936 | 0.20749776 |
| GOTERM_BP_DIRECT | negative regulation of sequence-specific DNA binding transcription factor                                                  | 3 | 3.06122449 | 0.04707932 | HMOX1, ESR1, SIRT1                            | 98 | 60  | 16792 | 8.5673469 | 1 | 0.23601936 | 0.20749776 |
| GOTERM_BP_DIRECT | regulation of cell                                                                                                         | 4 | 4.08163265 | 0.04745415 | IL6, CCL2, F2, ICAM1                          | 98 | 140 | 16792 | 4.8956268 | 1 | 0.23727075 | 0.20859793 |
| GOTERM_BP_DIRECT | cell adhesion                                                                                                              | 7 | 7.14285714 | 0.04989249 | VCAM1, SPPI, CYP1B1, CCL2, PRKCA, SELE, ICAM1 | 98 | 459 | 16792 | 2.6131341 | 1 | 0.24502712 | 0.21541698 |
| GOTERM_BP_DIRECT | DNA damage response, signal transduction by p53 class mediator resulting in cell cycle arrest                              | 3 | 3.06122449 | 0.04992877 | CDKN1A, BAX, TP53                             | 98 | 62  | 16792 | 8.2909809 | 1 | 0.24502712 | 0.21541698 |
| GOTERM_BP_DIRECT | SMAD protein signal transduction                                                                                           | 3 | 3.06122449 | 0.04992877 | JUN, TGFB1, FOS                               | 98 | 62  | 16792 | 8.2909809 | 1 | 0.24502712 | 0.21541698 |
| GOTERM_BP_DIRECT | negative regulation of angiogenesis                                                                                        | 3 | 3.06122449 | 0.04992877 | CXCL10, STAT1, CCL2                           | 98 | 62  | 16792 | 8.2909809 | 1 | 0.24502712 | 0.21541698 |
