# Supplementary material for: Explore the Mechanism of Astragalus mongholicus Bunge against Nonalcoholic Fatty Liver Disease Based on Network Pharmacology and Experimental Verification
Source: Hindawi journal article supplement (doi:10.1155/2022/4745042), 2022-04-05
Supplement: f1 [file 4745042.f1.zip]

| Category         | Term                                                                                    | Count | %          | PValue   | Genes                                                                                                                                                                                                                                                                                                                                                                                                                                                                                                                | List Total | Pop Hits | Pop Total | Fold Enrichment | Bonferroni | Benjamini | FDR      |
|------------------|-----------------------------------------------------------------------------------------|-------|------------|----------|----------------------------------------------------------------------------------------------------------------------------------------------------------------------------------------------------------------------------------------------------------------------------------------------------------------------------------------------------------------------------------------------------------------------------------------------------------------------------------------------------------------------|------------|----------|-----------|-----------------|------------|-----------|----------|
| GOTERM_MF_DIRECT | enzyme binding                                                                          | 25    | 25.5102041 | 4.70E-20 | PTEN, CYP3A4, PTGS2, EGFR, PPP3CA, MAPK8, RXRA, CCND1, AKT1, HMOX1, PTPN1, JUN, TGFB1, GSTM1, HSPA5, STAT1, CAV1, PRKCA, <del>MADK14 ESR1 SIRT1 CXCL10</del>                                                                                                                                                                                                                                                                                                                                                         | 98         | 333      | 16881     | 12.9320647      | 1.86E-17   | 1.86E-17  | 1.70E-17 |
| GOTERM_MF_DIRECT | protein binding                                                                         | 82    | 83.6734694 | 7.42E-11 | CHRM3, GSK3B, CDKN1A, CXCL8, SERPINE1, PTEN, HSPB1, AHR, SLC2A4, ELK1, TNF, SLC6A3, SLC6A4, ICAM1, CASP9, IKBKB, THBD, PPP3CA, IGHG1, CASP8, CCND1, PLAUI, MYC, CASP3, AKT1, CTSD, HSP90AA1, CHUK, IGFBP3, MMP2, AHS1, PRKCA, FOS, OPRM1, F2, MMP9, F3, SIRT1, IL1A, IRF1, BIRC5, PPARG, PPARA, TP53, PPARD, CRP, OPRD1, NR1I2, ADRB1, ADRB2, PTGS2, ACACA, EGFR, RELA, DPP4, MAPK8, RXRA, SPP1, HMOX1, DRD1, LDLR, PTPN1, NQO1, JUN, TGFB1, NOS2, HSPA5, STAT1, INSR, CAV1, <del>MADK14 SELE ESR1 SOD1 CXCL10</del> | 98         | 8785     | 16881     | 1.607845        | 2.93E-08   | 1.47E-08  | 1.34E-08 |
| GOTERM_MF_DIRECT | identical protein binding                                                               | 23    | 23.4693878 | 1.88E-10 | NQO1, JUN, HSP90AA1, STAT1, CAV1, PTEN, HSPB1, ESR1, SIRT1, TNF, MMP9, EGFR, RELA, SOD1, DPP4, <del>CASP8 BCL2 BAX BIRC5 AKT1</del>                                                                                                                                                                                                                                                                                                                                                                                  | 98         | 749      | 16881     | 5.28954252      | 7.42E-08   | 2.47E-08  | 2.27E-08 |
| GOTERM_MF_DIRECT | RNA polymerase II transcription factor activity, ligand-activated sequence-specific DNA | 8     | 8.16326531 | 1.21E-09 | RXRA, NR1I3, NR1I2, PPARG, AHR, PPARA, ESR1, PPARD                                                                                                                                                                                                                                                                                                                                                                                                                                                                   | 98         | 36       | 16881     | 38.2789116      | 4.78E-07   | 1.19E-07  | 1.09E-07 |

|                          |                                                       |    |            |          |                                                                                                                                       |    |     |       |            |            |          |          |
|--------------------------|-------------------------------------------------------|----|------------|----------|---------------------------------------------------------------------------------------------------------------------------------------|----|-----|-------|------------|------------|----------|----------|
| GOTER<br>M_MF_<br>DIRECT | protein<br>heterodim<br>erization<br>activity         | 17 | 17.3469388 | 8.68E-09 | JUN, TGFB1, CHUK, CAV1, ADRB1,<br>AHR, FOS, EGFR, RELA, IKBKB,<br>PPP3CA, RXRA, BCL2, BAX, BIRC5,<br>TP53, PPARD                      | 98 | 465 | 16881 | 6.29749835 | 3.43E-06   | 6.86E-07 | 6.29E-07 |
| GOTER<br>M_MF_<br>DIRECT | protein<br>homodim<br>erization<br>activity           | 20 | 20.4081633 | 2.80E-08 | JUN, HSP90AA1, TGFB1, GSTM1,<br>NOS2, CHUK, STAT1, PON1, ADRB2,<br>PTGS2, RELA, SLC6A4, SOD1, DPP4,<br>IKBKB, BCL2, BAX, BIRC5, HMOX1 | 98 | 730 | 16881 | 4.71931786 | 1.11E-05   | 1.84E-06 | 1.69E-06 |
| GOTER<br>M_MF_<br>DIRECT | transcripti<br>on factor<br>binding                   | 13 | 13.2653061 | 8.14E-08 | JUN, AHR, FOS, ESR1, SIRT1, RELA,<br>CCND1, MYC, BCL2, PPARG, PPARA,<br>TP53, PPARD                                                   | 98 | 284 | 16881 | 7.88491664 | 3.22E-05   | 4.60E-06 | 4.21E-06 |
| GOTER<br>M_MF_<br>DIRECT | protease<br>binding                                   | 9  | 9.18367347 | 1.16E-07 | DPP4, CASP3, SERPINE1, BCL2, TNF,<br>TP53, F3, LDLR, SLC6A3                                                                           | 98 | 101 | 16881 | 15.3494645 | 4.56E-05   | 5.71E-06 | 5.23E-06 |
| GOTER<br>M_MF_<br>DIRECT | drug<br>binding                                       | 8  | 8.16326531 | 2.63E-07 | PPP3CA, CHRM3, NR1I2, PPARG,<br>HTR2A, PPARA, SLC6A3, PPARD                                                                           | 98 | 76  | 16881 | 18.132116  | 1.04E-04   | 1.15E-05 | 1.06E-05 |
| GOTER<br>M_MF_<br>DIRECT | protein<br>phosphata<br>se 2A<br>binding              | 6  | 6.12244898 | 4.12E-07 | PTPN1, STAT1, BCL2, AKT1, TP53,<br>SLC6A3                                                                                             | 98 | 27  | 16881 | 38.2789116 | 1.63E-04   | 1.63E-05 | 1.49E-05 |
| GOTER<br>M_MF_<br>DIRECT | steroid<br>hormone<br>receptor<br>activity            | 7  | 7.14285714 | 7.93E-07 | RXRA, NR1I3, NR1I2, PPARG, PPARA,<br>ESR1, PPARD                                                                                      | 98 | 56  | 16881 | 21.5318878 | 3.13E-04   | 2.85E-05 | 2.61E-05 |
| GOTER<br>M_MF_<br>DIRECT | sequence-<br>specific<br>DNA<br>binding               | 15 | 15.3061224 | 1.49E-06 | JUN, NR1I3, NR1I2, FOS, ELK1, ESR1,<br>RXRA, MYC, IRF1, BCL2, PPARG,<br>PPARA, TP53, NFE2L2, PPARD                                    | 98 | 518 | 16881 | 4.98808211 | 5.88E-04   | 4.90E-05 | 4.49E-05 |
| GOTER<br>M_MF_<br>DIRECT | nitric-<br>oxide<br>synthase<br>regulator<br>activity | 4  | 4.08163265 | 1.01E-05 | HSP90AA1, AKT1, ESR1, EGFR                                                                                                            | 98 | 8   | 16881 | 86.127551  | 0.00397637 | 3.06E-04 | 2.81E-04 |
| GOTER<br>M_MF_<br>DIRECT | serine-<br>type<br>endopepti<br>dase<br>activity      | 10 | 10.2040816 | 1.60E-05 | DPP4, PRSS1, IGHG1, PLAUI, MMP1,<br>MMP2, F2, CTSD, F3, MMP9                                                                          | 98 | 255 | 16881 | 6.75510204 | 0.00629011 | 4.51E-04 | 4.13E-04 |
| GOTER<br>M_MF_<br>DIRECT | protein<br>complex<br>binding                         | 9  | 9.18367347 | 2.45E-05 | CDKN1A, CASP8, CCND1, MYC,<br>CASP3, HTR2A, PPARA, RELA, SLC6A3                                                                       | 98 | 206 | 16881 | 7.52570834 | 0.00962492 | 6.45E-04 | 5.91E-04 |

|                  |                                                                                                       |    |            |          |                                                                                                          |    |     |       |            |            |            |            |
|------------------|-------------------------------------------------------------------------------------------------------|----|------------|----------|----------------------------------------------------------------------------------------------------------|----|-----|-------|------------|------------|------------|------------|
| GOTERM_MF_DIRECT | transcription regulatory region DNA binding                                                           | 9  | 9.18367347 | 3.11E-05 | JUN, RXRA, PPARG, FOS, AHR, TNF, TP53, RELA, NFE2L2                                                      | 98 | 213 | 16881 | 7.27838459 | 0.01220857 | 7.68E-04   | 7.04E-04   |
| GOTERM_MF_DIRECT | protein kinase binding                                                                                | 11 | 11.2244898 | 6.00E-05 | CASP9, IKBKB, GSK3B, PTPN1, CCND1, CAV1, PTEN, HSPB1, TP53, RELA, EGFR                                   | 98 | 376 | 16881 | 5.03937799 | 0.02340349 | 0.001393   | 0.00127662 |
| GOTERM_MF_DIRECT | chaperone binding                                                                                     | 6  | 6.12244898 | 1.02E-04 | HSPA5, BAX, AHSA1, BIRC5, TP53, SOD1                                                                     | 98 | 81  | 16881 | 12.7596372 | 0.03965482 | 0.0022478  | 0.00206001 |
| GOTERM_MF_DIRECT | transcription factor activity, sequence-specific DNA binding                                          | 17 | 17.3469388 | 1.10E-04 | JUN, STAT1, NR1I3, NR1I2, AHR, FOS, ELK1, ESR1, RELA, RXRA, MYC, IRF1, PPARG, PPARA, TP53, NFE2L2, PPARG | 98 | 961 | 16881 | 3.04717662 | 0.04244962 | 0.00228287 | 0.00209215 |
| GOTERM_MF_DIRECT | heme binding                                                                                          | 7  | 7.14285714 | 1.38E-04 | NOS2, CYP1A1, CYP1B1, HMOX1, CYP3A4, PTGS2, MPO                                                          | 98 | 137 | 16881 | 8.80135558 | 0.05309565 | 0.00272767 | 0.00249979 |
| GOTERM_MF_DIRECT | transcriptional activator activity, RNA polymerase II core promoter proximal region sequence-specific | 8  | 8.16326531 | 4.22E-04 | JUN, MYC, IRF1, FOS, PPARA, ELK1, ESR1, RELA                                                             | 98 | 236 | 16881 | 5.839156   | 0.15351836 | 0.00793484 | 0.00727193 |
| GOTERM_MF_DIRECT | protein phosphatase                                                                                   | 5  | 5.10204082 | 4.71E-04 | HSP90AA1, PPARG, MAPK14, TP53, EGFR                                                                      | 98 | 63  | 16881 | 13.6710398 | 0.16968946 | 0.00845053 | 0.00774454 |
| GOTERM_MF_DIRECT | glycoprotein binding                                                                                  | 5  | 5.10204082 | 5.30E-04 | HSP90AA1, TGFB1, HSPA5, LDLR, EGFR                                                                       | 98 | 65  | 16881 | 13.2503925 | 0.189028   | 0.00875619 | 0.00802466 |

|                    |                                                                       |   |            |            |                                                            |    |     |       |            |            |            |            |
|--------------------|-----------------------------------------------------------------------|---|------------|------------|------------------------------------------------------------|----|-----|-------|------------|------------|------------|------------|
| GOTERM_M_MF_DIRECT | cytokine activity                                                     | 7 | 7.14285714 | 5.32E-04   | IL1A, IL6, TGFB1, IFNG, IL1B, SPP1, TNF                    | 98 | 176 | 16881 | 6.85105519 | 0.18958151 | 0.00875619 | 0.00802466 |
| GOTERM_M_MF_DIRECT | RNA polymerase II core promoter proximal region sequence-specific DNA | 9 | 9.18367347 | 0.00100486 | JUN, STAT1, MYC, IRF1, FOS, PPARA, ELK1, ESR1, RELA        | 98 | 355 | 16881 | 4.36703076 | 0.32774731 | 0.01587686 | 0.01455044 |
| GOTERM_M_MF_DIRECT | protein kinase activity                                               | 9 | 9.18367347 | 0.00107971 | IKBKB, GSK3B, CCND1, CHUK, CCL2, AKT1, PRKCA, MAPK14, EGFR | 98 | 359 | 16881 | 4.31837303 | 0.3473507  | 0.01640327 | 0.01503287 |
| GOTERM_M_MF_DIRECT | double-stranded DNA binding                                           | 5 | 5.10204082 | 0.00121503 | STAT1, MYC, ELK1, TP53, EGFR                               | 98 | 81  | 16881 | 10.633031  | 0.38135907 | 0.0177755  | 0.01629046 |
| GOTERM_M_MF_DIRECT | ubiquitin protein ligase binding                                      | 8 | 8.16326531 | 0.001331   | GSK3B, CDKN1A, CASP8, HSPA5, BCL2, TP53, RELA, EGFR        | 98 | 287 | 16881 | 4.80153595 | 0.40909108 | 0.01877654 | 0.01720787 |
| GOTERM_M_MF_DIRECT | chromatin binding                                                     | 9 | 9.18367347 | 0.00185301 | JUN, PPARG, FOS, MPO, ELK1, ESR1, TP53, RELA, EGFR         | 98 | 391 | 16881 | 3.9649512  | 0.51935028 | 0.02523922 | 0.02313063 |
| GOTERM_M_MF_DIRECT | core promoter sequence-specific DNA binding                           | 4 | 4.08163265 | 0.00192141 | PPARG, ESR1, SIRT1, TP53                                   | 98 | 43  | 16881 | 16.0237304 | 0.53218795 | 0.02529862 | 0.02318506 |
| GOTERM_M_MF_DIRECT | cysteine-type endopeptidase activity involved in apoptotic            | 3 | 3.06122449 | 0.00244594 | CASP9, CASP8, CASP3                                        | 98 | 13  | 16881 | 39.7511774 | 0.61990405 | 0.03116607 | 0.02856232 |

|                          |                                                                                                                                                                       |    |            |            |                                                                                              |    |      |       |            |            |            |            |
|--------------------------|-----------------------------------------------------------------------------------------------------------------------------------------------------------------------|----|------------|------------|----------------------------------------------------------------------------------------------|----|------|-------|------------|------------|------------|------------|
| GOTER<br>M_MF_<br>DIRECT | chemokine activity                                                                                                                                                    | 4  | 4.08163265 | 0.00279807 | CXCL10, CXCL11, CXCL8, CCL2                                                                  | 98 | 49   | 16881 | 14.061641  | 0.66938026 | 0.03453866 | 0.03165315 |
| GOTER<br>M_MF_<br>DIRECT | oxidoreductase activity, acting on paired donors, with incorporation or reduction of molecular oxygen, reduced flavin or flavoprotein as one donor, and incorporation | 3  | 3.06122449 | 0.00326808 | CYP1A1, CYP1B1, CYP3A4                                                                       | 98 | 15   | 16881 | 34.4510204 | 0.7255549  | 0.03911788 | 0.0358498  |
| GOTER<br>M_MF_<br>DIRECT | receptor binding                                                                                                                                                      | 8  | 8.16326531 | 0.00423487 | DPP4, CXCL10, NOS2, CAV1, SERPINE1, CCL2, F2, SLC6A3                                         | 98 | 353  | 16881 | 3.90379835 | 0.81293972 | 0.04919919 | 0.04508888 |
| GOTER<br>M_MF_<br>DIRECT | cysteine-type endopeptidase activity                                                                                                                                  | 4  | 4.08163265 | 0.00520131 | CASP9, CASP8, CASP3, CTSD                                                                    | 98 | 61   | 16881 | 11.2954165 | 0.87253063 | 0.0587005  | 0.05379641 |
| GOTER<br>M_MF_<br>DIRECT | zinc ion binding                                                                                                                                                      | 15 | 15.3061224 | 0.00681086 | PTPN1, MMP1, NR1I3, MMP2, NR1I2, PRKCA, ESR1, MMP9, SOD1, RXRA, BIRC5 PPARG PPARA TP53 PPARD | 98 | 1169 | 16881 | 2.21028788 | 0.93276053 | 0.07473032 | 0.06848703 |
| GOTER<br>M_MF_<br>DIRECT | virus receptor activity                                                                                                                                               | 4  | 4.08163265 | 0.00762292 | DPP4, HTR2A, LDLR, ICAM1                                                                     | 98 | 70   | 16881 | 9.84314869 | 0.95132486 | 0.08137978 | 0.07458096 |
| GOTER<br>M_MF_<br>DIRECT | aromatase activity                                                                                                                                                    | 3  | 3.06122449 | 0.0104466  | CYP1A1, CYP1B1, CYP3A4                                                                       | 98 | 27   | 16881 | 19.1394558 | 0.98420577 | 0.10858962 | 0.09951758 |

|                          |                                                    |   |            |            |                                            |    |     |       |            |            |            |            |
|--------------------------|----------------------------------------------------|---|------------|------------|--------------------------------------------|----|-----|-------|------------|------------|------------|------------|
| GOTER<br>M_MF_<br>DIRECT | lipid<br>binding                                   | 5 | 5.10204082 | 0.01121283 | PTEN, BAX, PPARA, PTGS2, PPARD             | 98 | 151 | 16881 | 5.70381133 | 0.98836904 | 0.11316287 | 0.10370875 |
| GOTER<br>M_MF_<br>DIRECT | vitamin D<br>24-<br>hydroxyla<br>se activity       | 2 | 2.04081633 | 0.01145953 | CYP1A1, CYP3A4                             | 98 | 2   | 16881 | 172.255102 | 0.98946077 | 0.11316287 | 0.10370875 |
| GOTER<br>M_MF_<br>DIRECT | tumor<br>necrosis<br>factor<br>receptor<br>binding | 3 | 3.06122449 | 0.01199401 | CASP8, STAT1, TNF                          | 98 | 29  | 16881 | 17.8194933 | 0.99148798 | 0.11555208 | 0.10589836 |
| GOTER<br>M_MF_<br>DIRECT | kinase<br>activity                                 | 6 | 6.12244898 | 0.01267021 | GSK3B, CDKN1A, MAPK8, PLAU,<br>AKT1, PRKCA | 98 | 241 | 16881 | 4.28850876 | 0.99350491 | 0.11760962 | 0.10778401 |
| GOTER<br>M_MF_<br>DIRECT | NF-<br>kappaB<br>binding                           | 3 | 3.06122449 | 0.01280307 | GSK3B, RELA, PPARD                         | 98 | 30  | 16881 | 17.2255102 | 0.99384116 | 0.11760962 | 0.10778401 |
| GOTER<br>M_MF_<br>DIRECT | IkappaB<br>kinase<br>activity                      | 2 | 2.04081633 | 0.01714046 | IKBKB, CHUK                                | 98 | 3   | 16881 | 114.836735 | 0.99891825 | 0.1538746  | 0.14101925 |
| GOTER<br>M_MF_<br>DIRECT | protein<br>N-<br>terminus                          | 4 | 4.08163265 | 0.01837868 | TGFB1, TP53, RELA, SLC6A3                  | 98 | 97  | 16881 | 7.10330318 | 0.99934254 | 0.16132399 | 0.14784629 |
| GOTER<br>M_MF_<br>DIRECT | histone<br>deacetyla<br>se                         | 4 | 4.08163265 | 0.02096991 | HSP90AA1, MAPK8, CCND1, RELA               | 98 | 102 | 16881 | 6.75510204 | 0.99976856 | 0.18006775 | 0.16502411 |
| GOTER<br>M_MF_<br>DIRECT | integrin<br>binding                                | 4 | 4.08163265 | 0.02261607 | COL3A1, VCAM1, EGFR, ICAM1                 | 98 | 105 | 16881 | 6.56209913 | 0.99988094 | 0.18370789 | 0.16836014 |
| GOTER<br>M_MF_<br>DIRECT | BH3<br>domain<br>binding                           | 2 | 2.04081633 | 0.02278908 | BCL2, BAX                                  | 98 | 4   | 16881 | 86.127551  | 0.99988898 | 0.18370789 | 0.16836014 |
| GOTER<br>M_MF_<br>DIRECT | norepinep<br>hrine<br>binding                      | 2 | 2.04081633 | 0.02278908 | ADRB1, ADRB2                               | 98 | 4   | 16881 | 86.127551  | 0.99988898 | 0.18370789 | 0.16836014 |
| GOTER<br>M_MF_<br>DIRECT | CXCR3<br>chemokin<br>e receptor<br>binding         | 2 | 2.04081633 | 0.02840557 | CXCL10, CXCL11                             | 98 | 5   | 16881 | 68.9020408 | 0.99998861 | 0.21577306 | 0.19774645 |

|                  |                                                           |   |            |            |                                   |    |     |       |            |            |            |            |
|------------------|-----------------------------------------------------------|---|------------|------------|-----------------------------------|----|-----|-------|------------|------------|------------|------------|
| GOTERM_MF_DIRECT | superoxide dismutase activity                             | 2 | 2.04081633 | 0.02840557 | NQO1, SOD1                        | 98 | 5   | 16881 | 68.9020408 | 0.99998861 | 0.21577306 | 0.19774645 |
| GOTERM_MF_DIRECT | NFAT protein binding                                      | 2 | 2.04081633 | 0.02840557 | MAPK14, PPARA                     | 98 | 5   | 16881 | 68.9020408 | 0.99998861 | 0.21577306 | 0.19774645 |
| GOTERM_MF_DIRECT | oxygen binding                                            | 3 | 3.06122449 | 0.02987658 | CYP1A1, CYP1B1, CYP3A4            | 98 | 47  | 16881 | 10.9950065 | 0.99999374 | 0.21854164 | 0.20028373 |
| GOTERM_MF_DIRECT | RNA polymerase II transcription factor activity           | 3 | 3.06122449 | 0.02987658 | GSK3B, ELK1, TP53                 | 98 | 47  | 16881 | 10.9950065 | 0.99999374 | 0.21854164 | 0.20028373 |
| GOTERM_MF_DIRECT | scaffold protein binding                                  | 3 | 3.06122449 | 0.03106088 | IKBKB, CASP8, CHUK                | 98 | 48  | 16881 | 10.7659439 | 0.99999614 | 0.22140206 | 0.20290518 |
| GOTERM_MF_DIRECT | protein domain specific binding                           | 5 | 5.10204082 | 0.03194916 | HSPA5, IL1B, OPRM1, PPARA, NFE2L2 | 98 | 208 | 16881 | 4.14074765 | 0.99999731 | 0.22140206 | 0.20290518 |
| GOTERM_MF_DIRECT | RNA polymerase II regulatory region sequence-specific DNA | 5 | 5.10204082 | 0.03194916 | RXRA, NR1I3, NR1I2, TP53, RELA    | 98 | 208 | 16881 | 4.14074765 | 0.99999731 | 0.22140206 | 0.20290518 |
| GOTERM_MF_DIRECT | epinephrine binding                                       | 2 | 2.04081633 | 0.0339901  | ADRB1, ADRB2                      | 98 | 6   | 16881 | 57.4183673 | 0.99999883 | 0.23148433 | 0.21214514 |
| GOTERM_MF_DIRECT | monoamine transmembrane transporter activity              | 2 | 2.04081633 | 0.03954287 | SLC6A3, SLC6A4                    | 98 | 7   | 16881 | 49.2157434 | 0.99999988 | 0.26473618 | 0.24261898 |

|                  |                                       |   |            |            |                        |    |    |       |            |            |            |            |
|------------------|---------------------------------------|---|------------|------------|------------------------|----|----|-------|------------|------------|------------|------------|
| GOTERM_MF_DIRECT | copper ion binding                    | 3 | 3.06122449 | 0.04117632 | IL1A, TP53, SOD1       | 98 | 56 | 16881 | 9.2279519  | 0.99999994 | 0.27107745 | 0.24843048 |
| GOTERM_MF_DIRECT | monooxygenase activity                | 3 | 3.06122449 | 0.04387454 | CYP1A1, CYP1B1, CYP3A4 | 98 | 58 | 16881 | 8.90974666 | 0.99999998 | 0.28254444 | 0.25893946 |
| GOTERM_MF_DIRECT | insulin-like growth factor II binding | 2 | 2.04081633 | 0.04506405 | INSR, IGFBP3           | 98 | 8  | 16881 | 43.0637755 | 0.99999999 | 0.28254444 | 0.25893946 |
| GOTERM_MF_DIRECT | thyroid hormone receptor activity     | 2 | 2.04081633 | 0.04506405 | NR1I3, NR1I2           | 98 | 8  | 16881 | 43.0637755 | 0.99999999 | 0.28254444 | 0.25893946 |
