# Supplementary material for: Explore the Mechanism of Astragalus mongholicus Bunge against Nonalcoholic Fatty Liver Disease Based on Network Pharmacology and Experimental Verification
Source: Gastroenterol Res Pract. 2022 Apr 5;2022:4745042. doi: 10.1155/2022/4745042 (PMC9005278; doi:10.1155/2022/4745042)
Supplement: Supplementary Materials — Table S1: the bioactive components and corresponding targets of ABM. Table S2: information of NAFLD-related targets collected from the GeneCards database. Table S3: the common targets of ABM and NAFLD. Table S4: the 383 biological process terms. Table S5: the 40 cellular component terms. Table S6: the 63 molecular function terms. [file 4745042.f1.zip]

Archive with 7 entries (6 files):
- 4745042.f1/Table S1.pdf
- 4745042.f1/Table S2.pdf
- 4745042.f1/Table S3.pdf
- 4745042.f1/Table S4.pdf
- 4745042.f1/Table S5.pdf
- 4745042.f1/Table S6.pdf
- 4745042.f1/
